# Supplementary material for: Design, green synthesis, and quorum sensing quenching potential of novel 2-oxo-pyridines containing a thiophene/furan scaffold and targeting a LasR gene on P. aeruginosa
Source: Royal Society of Chemistry journal article supplement (doi:10.1039/d3ra04230h), 2023-01-01
Supplement: d3ra04230h1.pdf [file d3ra04230h1.pdf]

**Design, green synthesis, and quorum sensing quenching potential of novel 2-oxo-pyridines containing thiophene/furan scaffold targeting lasr gene on *p. aeruginosa***

Yousry A. Ammar <sup>a</sup>, Ahmed Ragab <sup>a,\*</sup>, M. A. Migahed <sup>b</sup>, S. Al-Sharbasy <sup>c</sup>, Mohamed A. Salem <sup>d</sup>, Omnia Kareem M. Riad <sup>e</sup>, Heba Mohammed Refat M. Selim <sup>e,f,\*</sup>, Gehad A. Abd-elmaksoud <sup>c</sup>, Moustafa S. Abusaif <sup>a</sup>

<sup>a</sup> Department of Chemistry, Faculty of Science (boys), Al-Azhar University, 11884 Nasr City, Cairo-Egypt

<sup>b</sup> Egyptian Petroleum Research Institute (EPRI), 11727 Nasr City, Cairo-Egypt.

<sup>c</sup> Department of Chemistry, Faculty of Science (girls), Al-Azhar University, 11884 Nasr City, Cairo-Egypt

<sup>d</sup> Department of Chemistry, Faculty of Science and Arts, King Khalid University, Mohail, Assir, Saudi Arabia

<sup>e</sup> Department of Microbiology and Immunology, Faculty of Pharmacy (Girls), Al-Azhar University, Nasr City, Cairo, Egypt

<sup>f</sup> Department of Pharmaceutical Sciences, Faculty of Pharmacy, Al-Maarefa University, Diriyah, 13713, Riyadh, Saudi Arabia

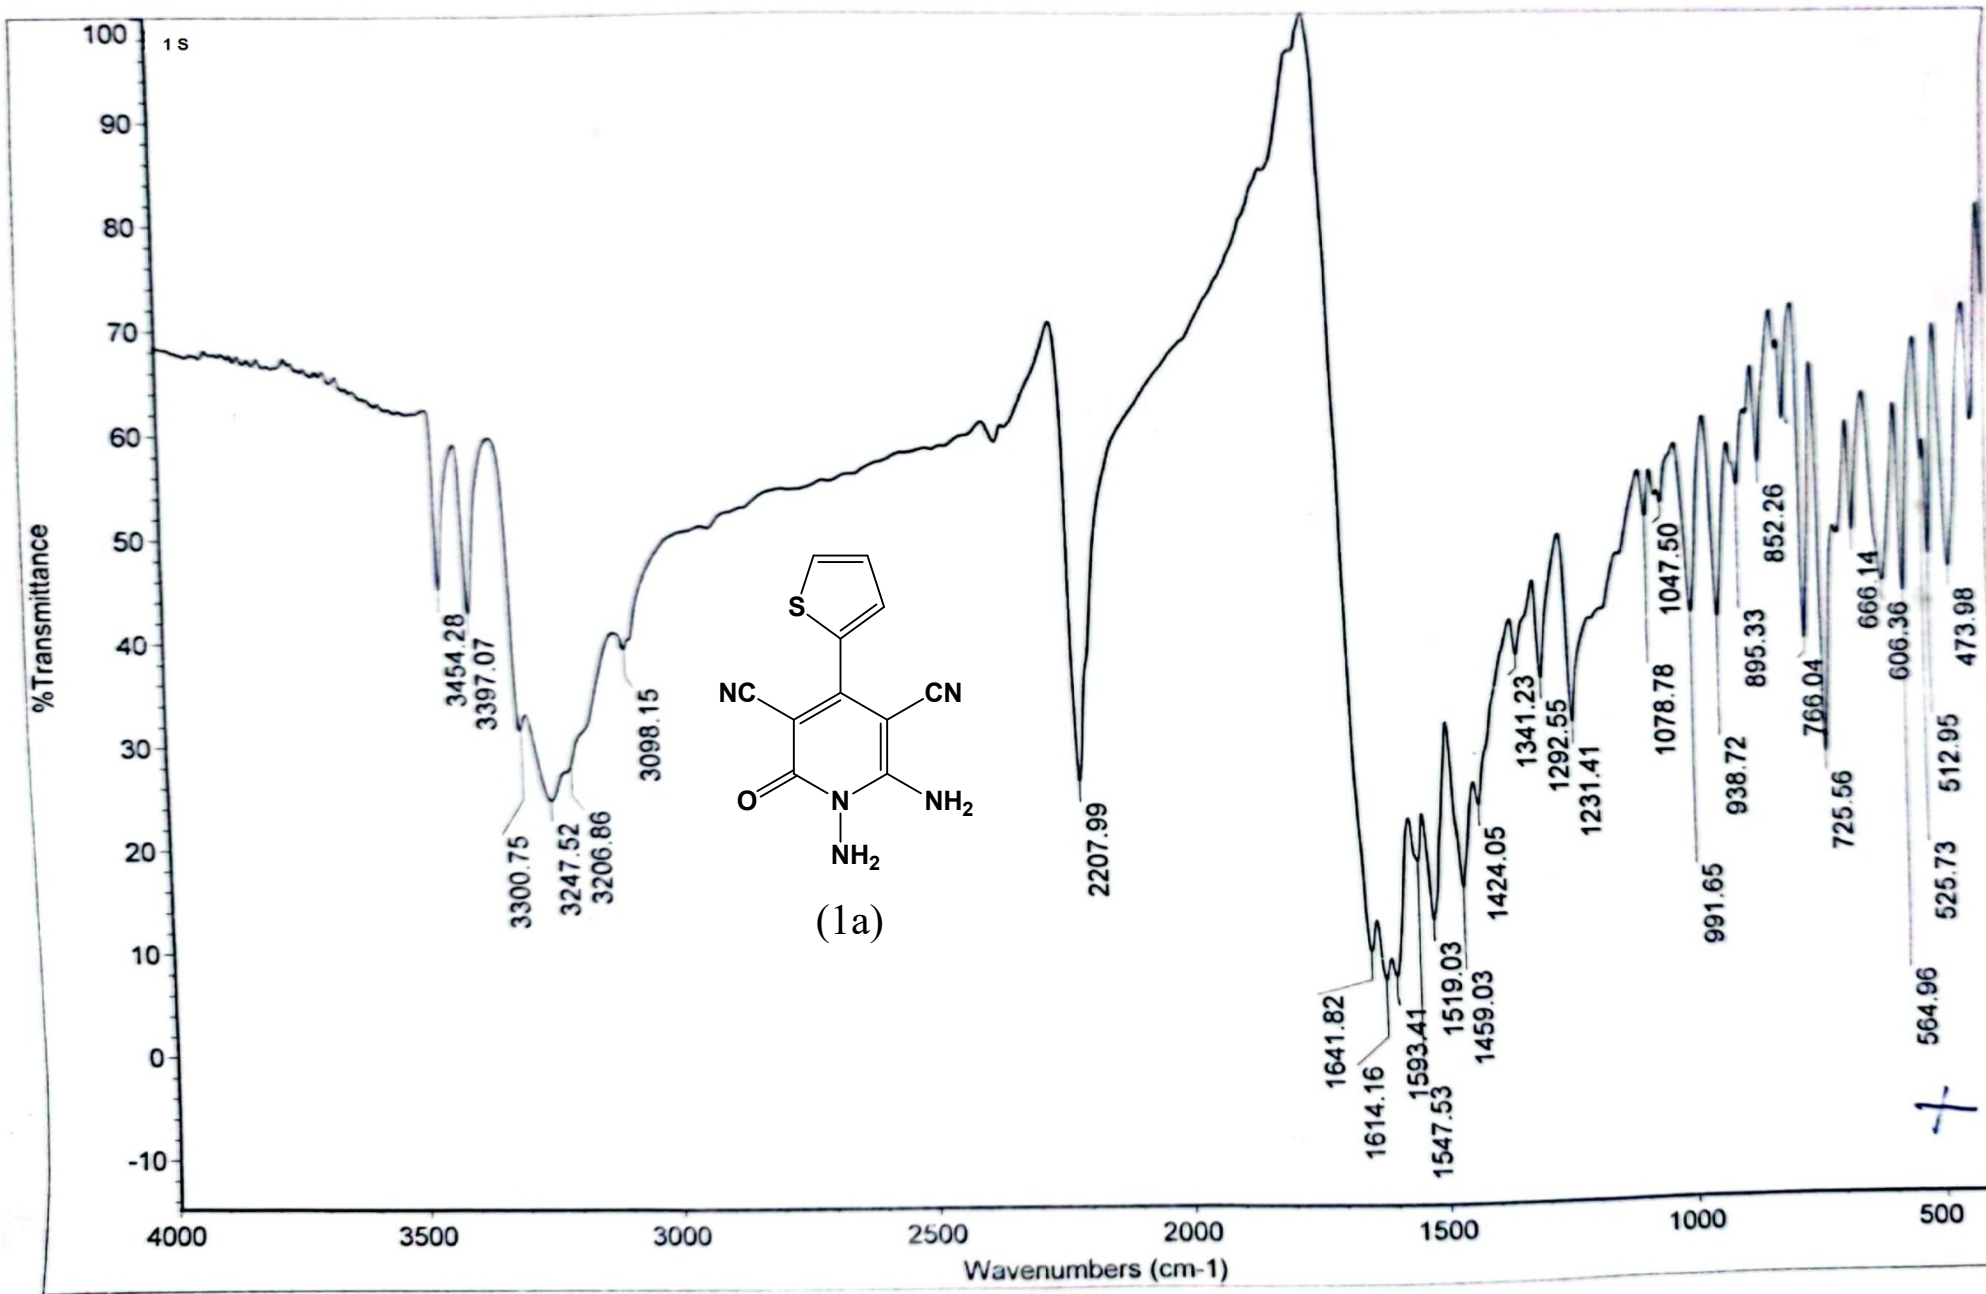

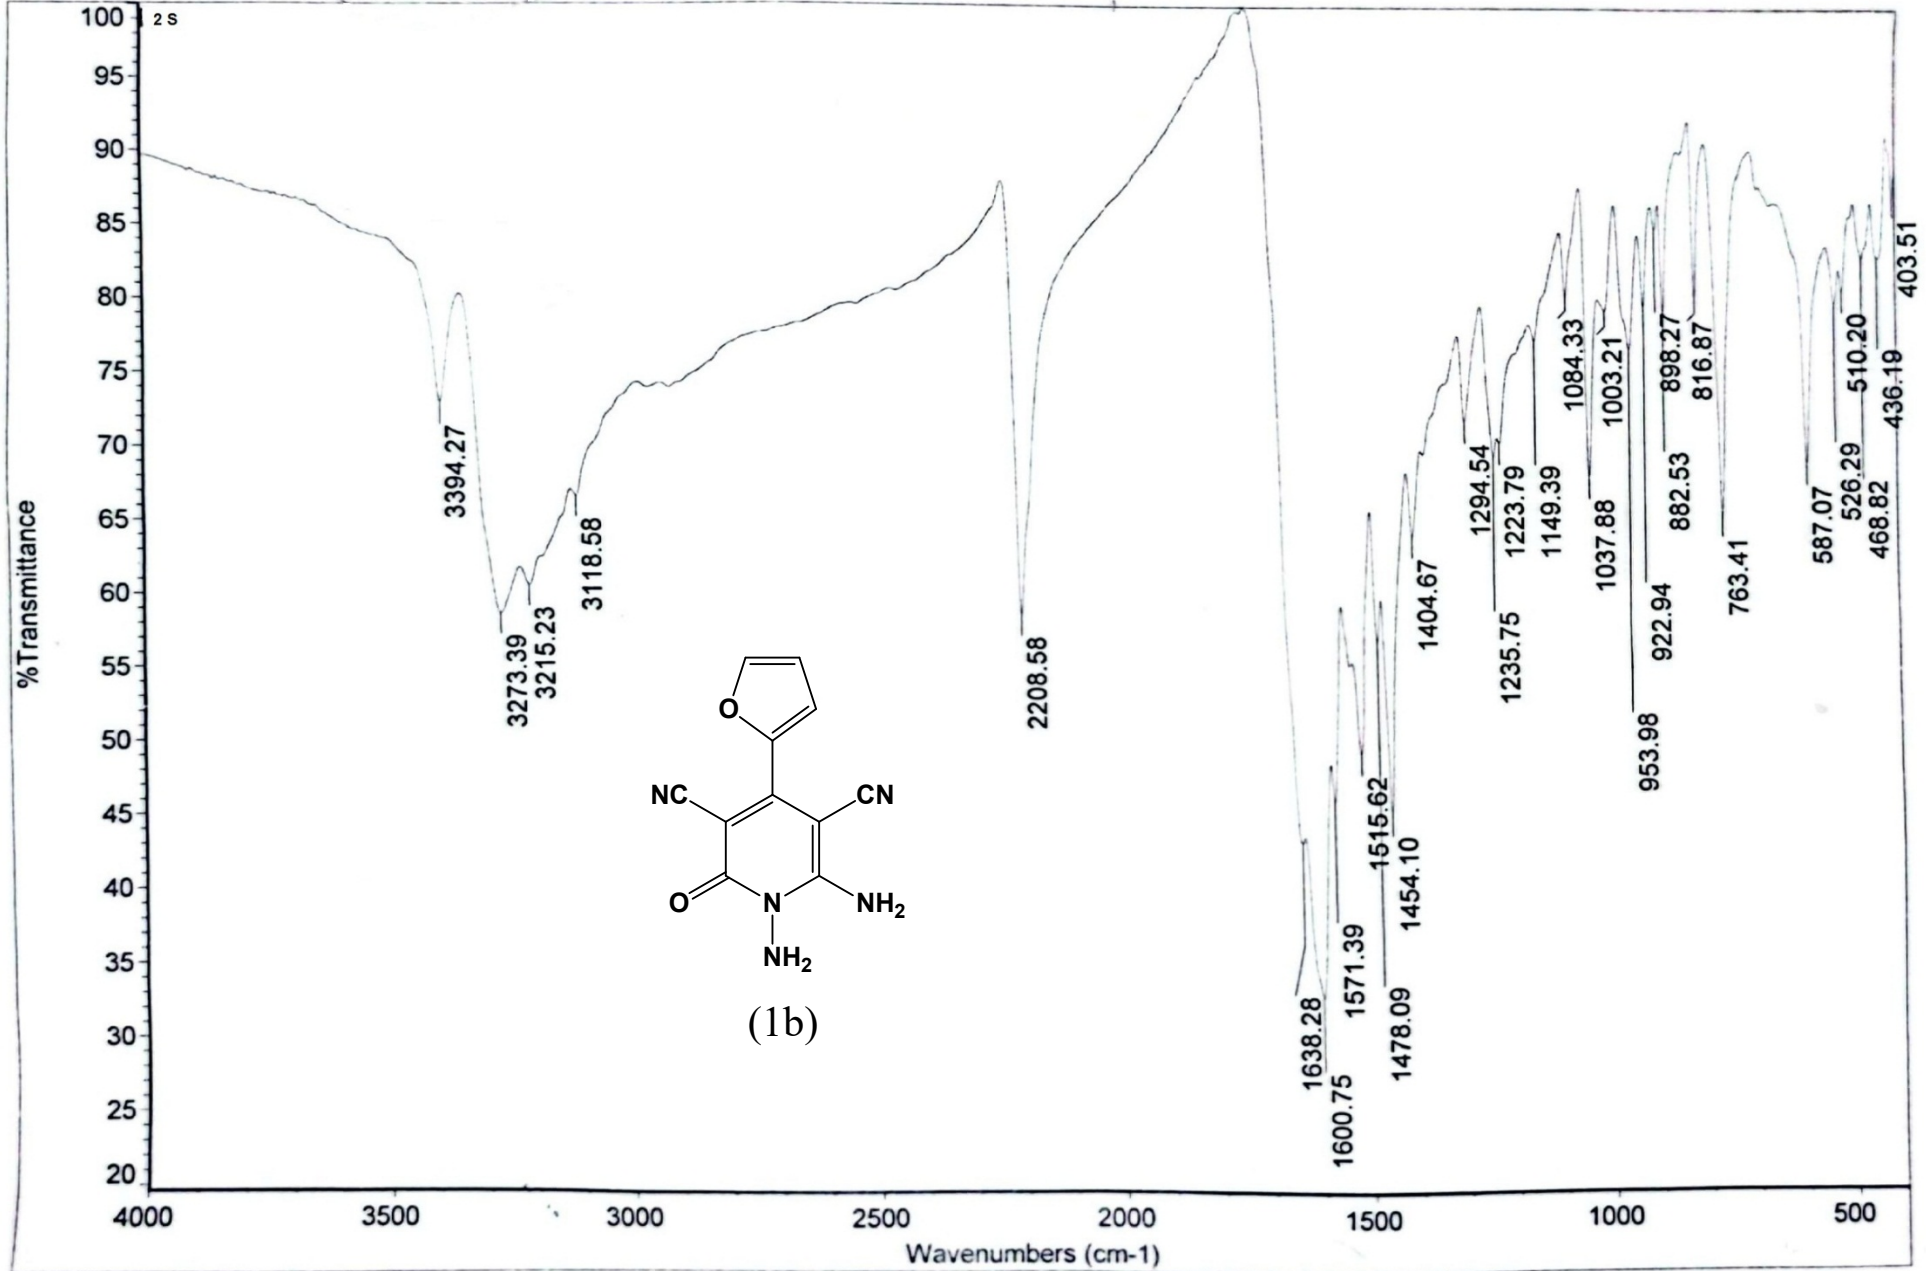

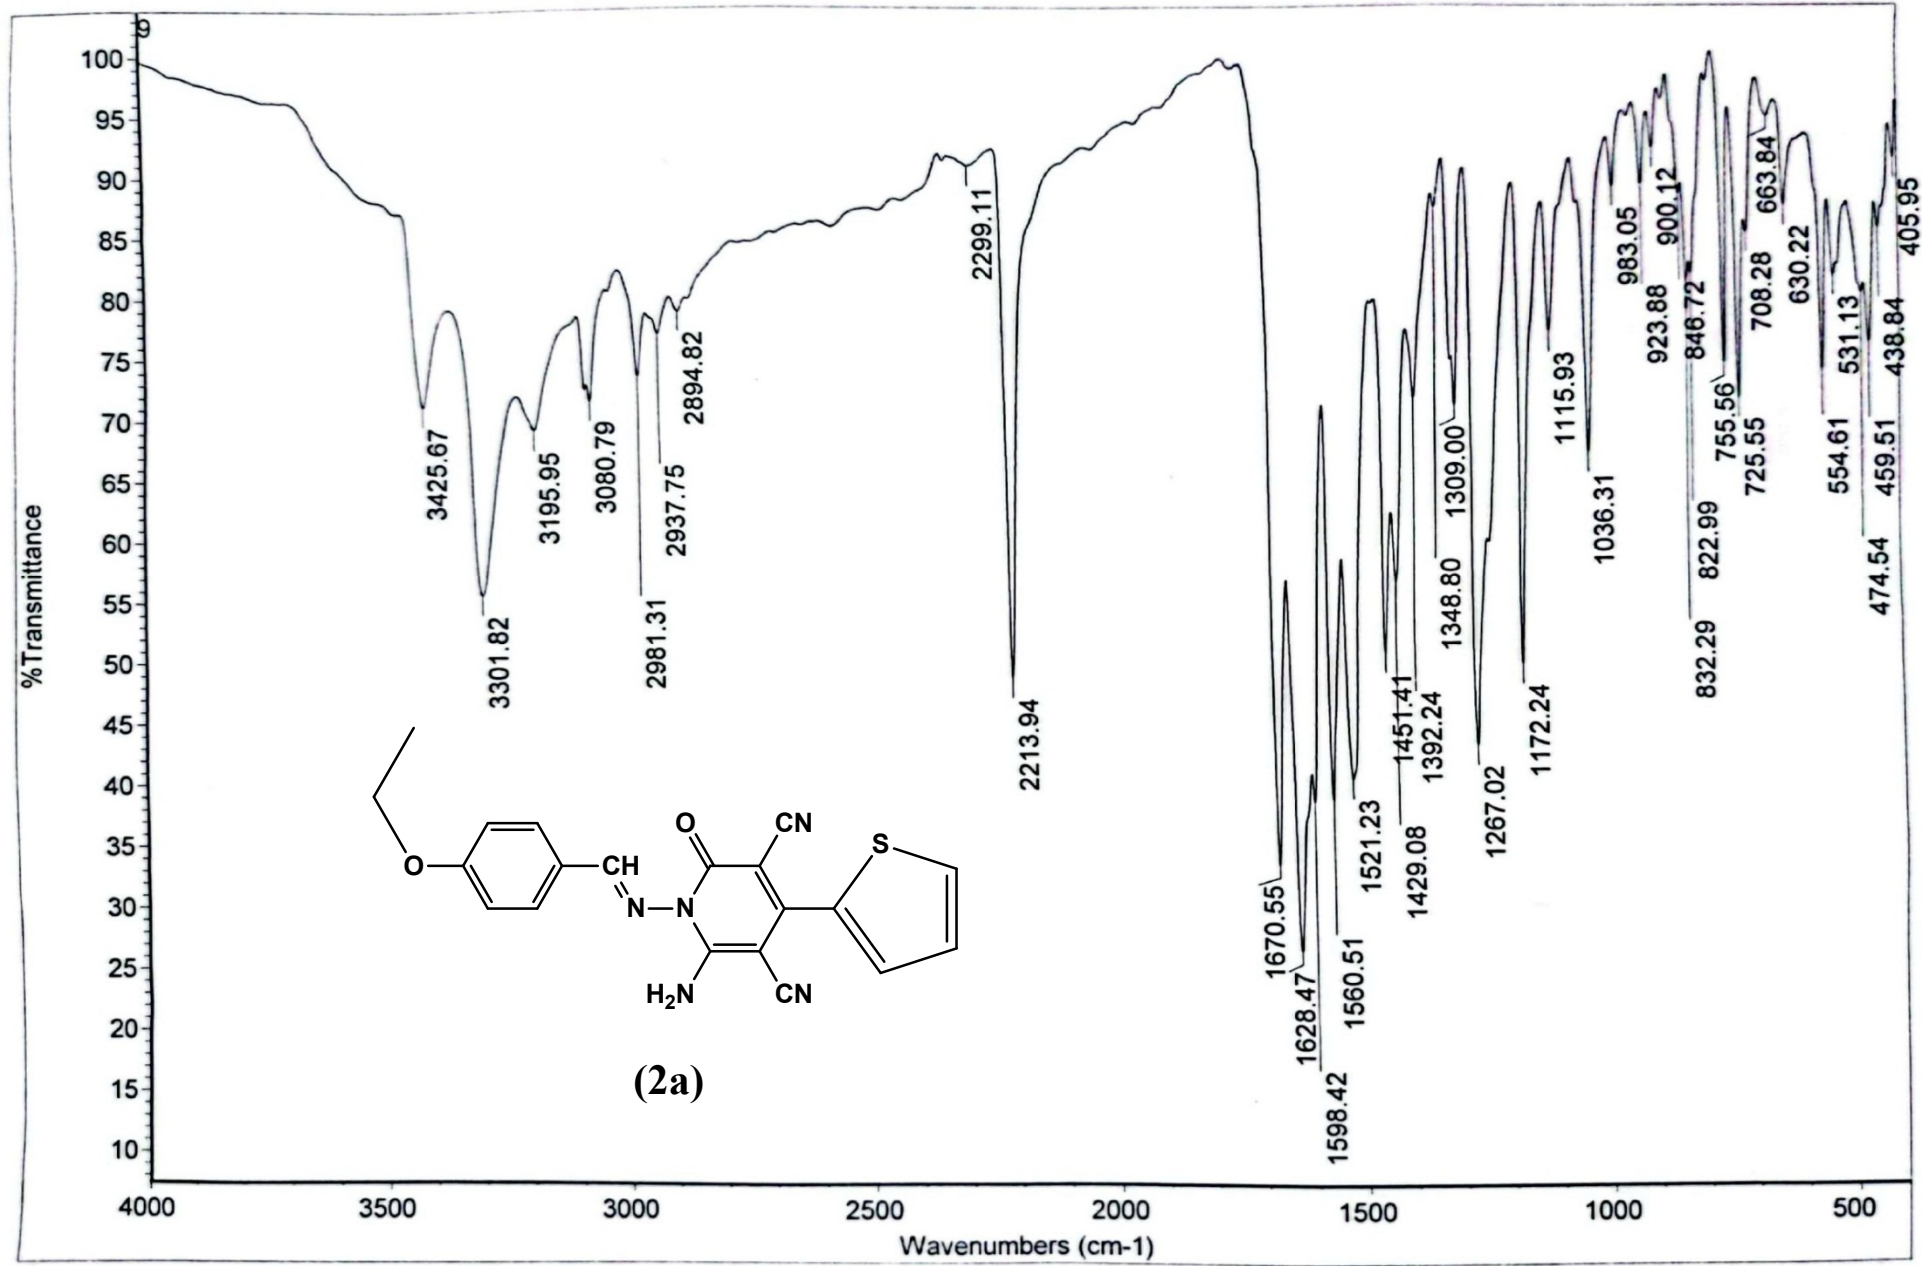

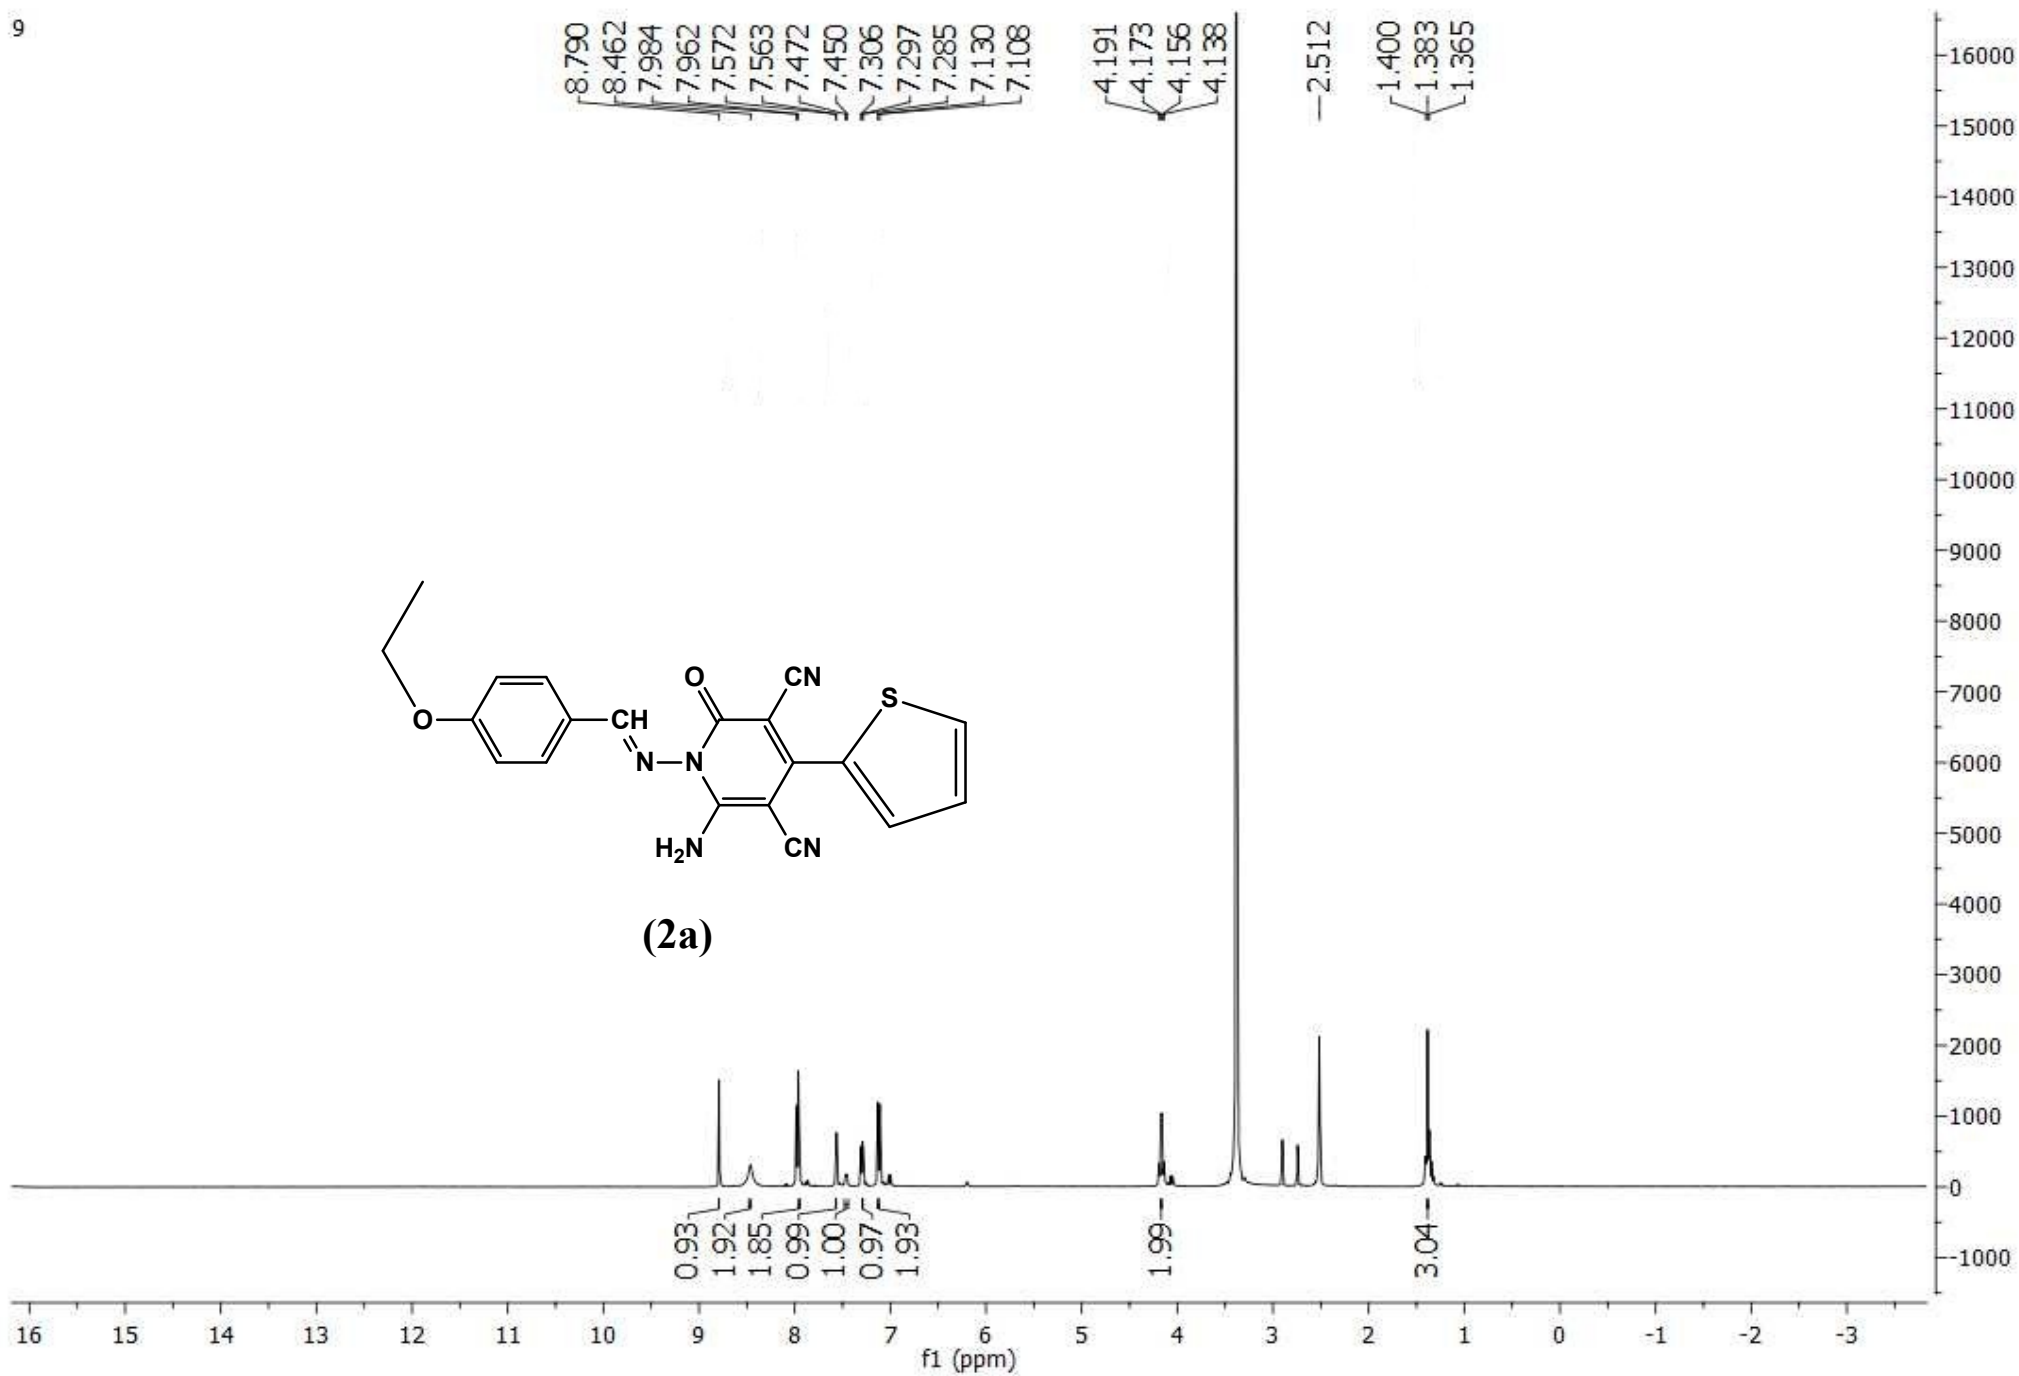

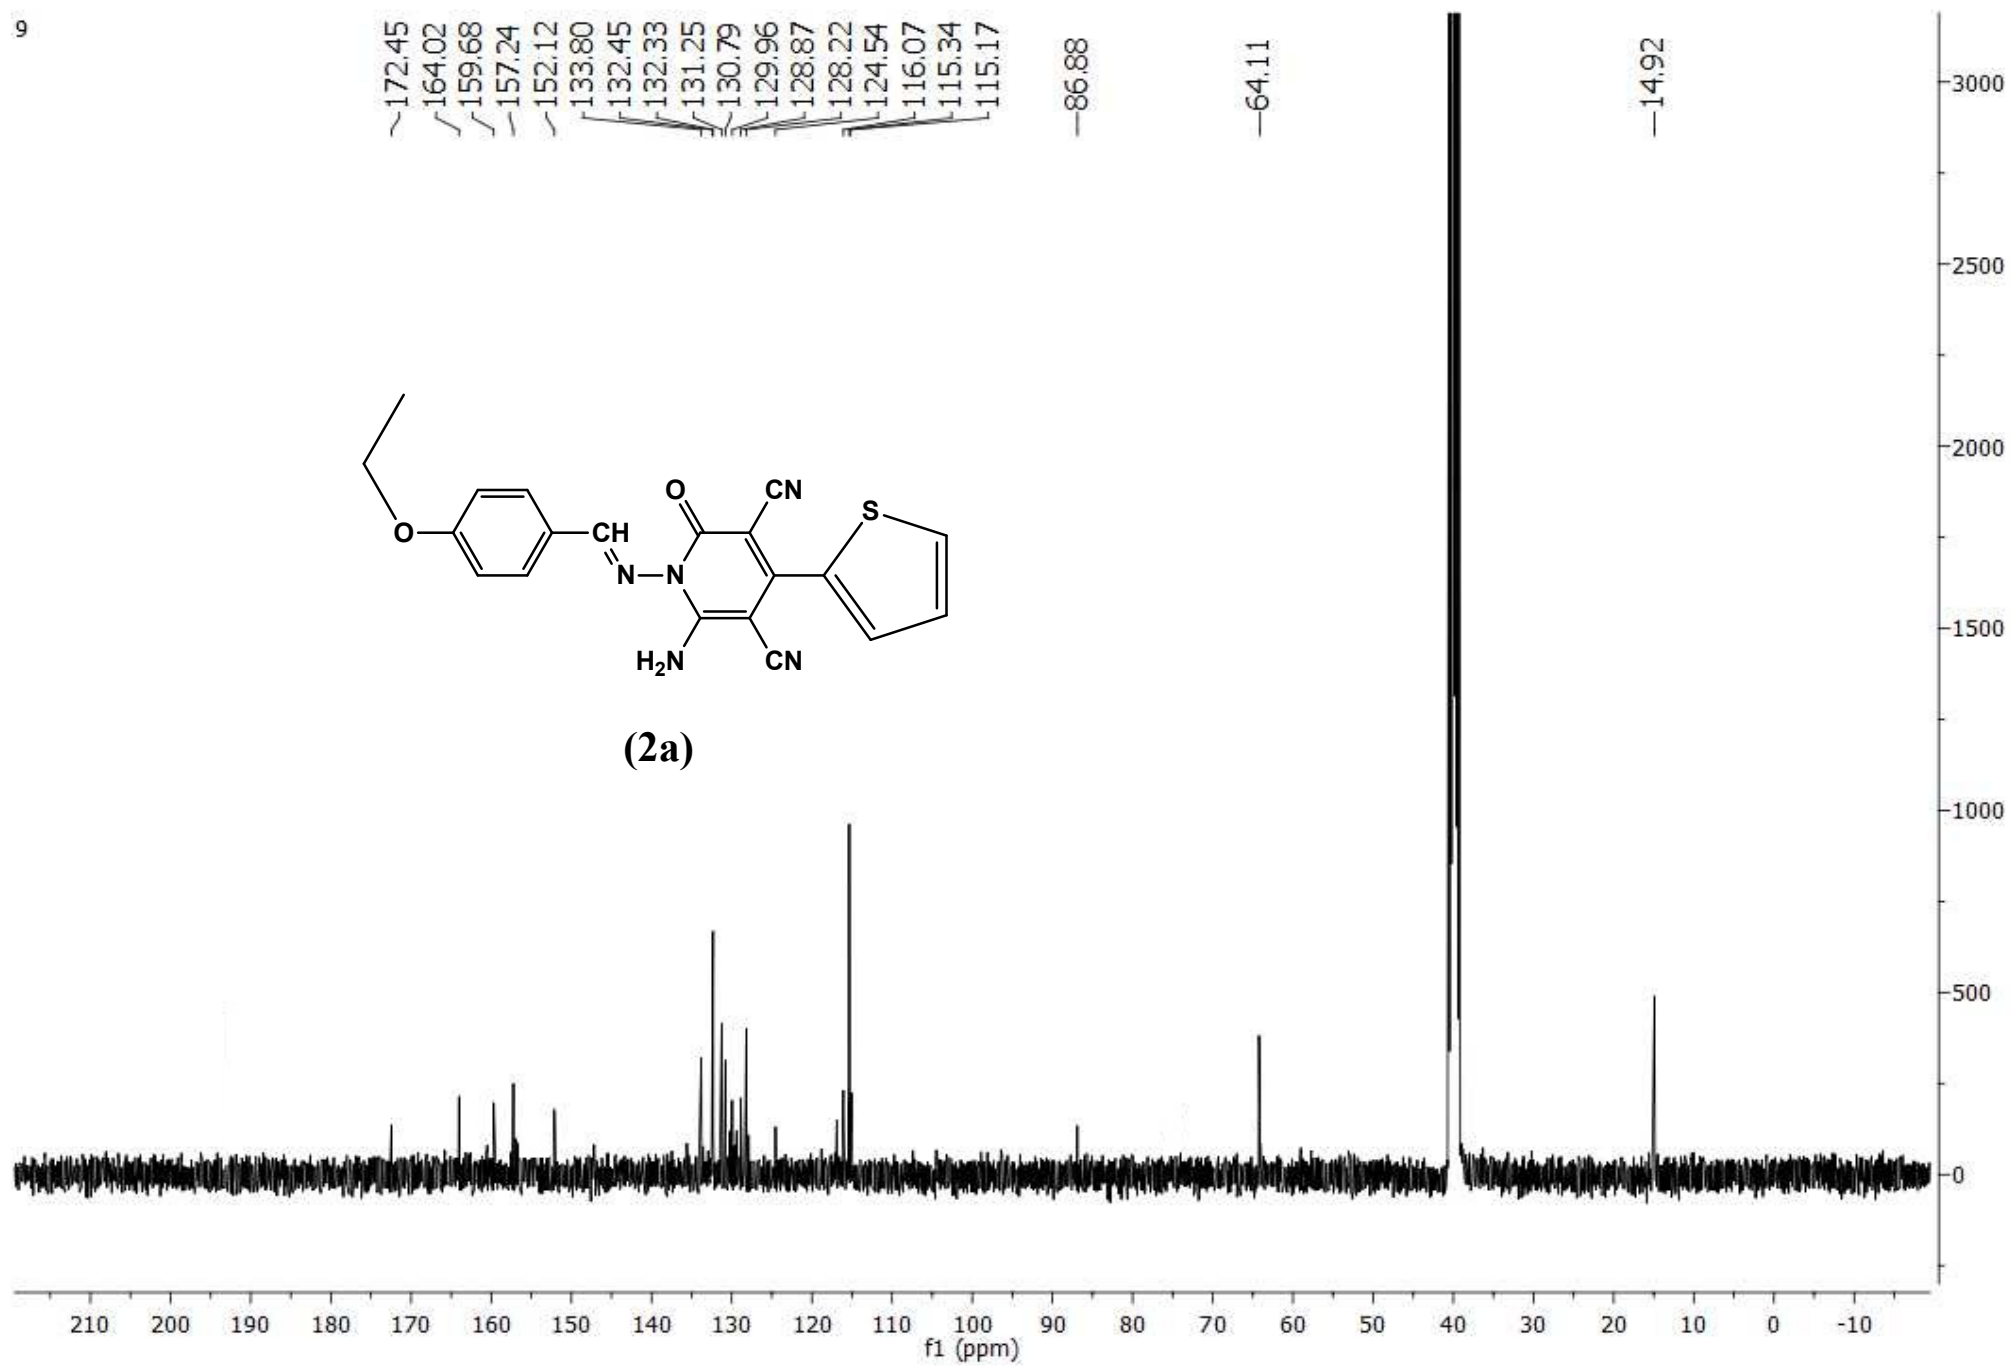

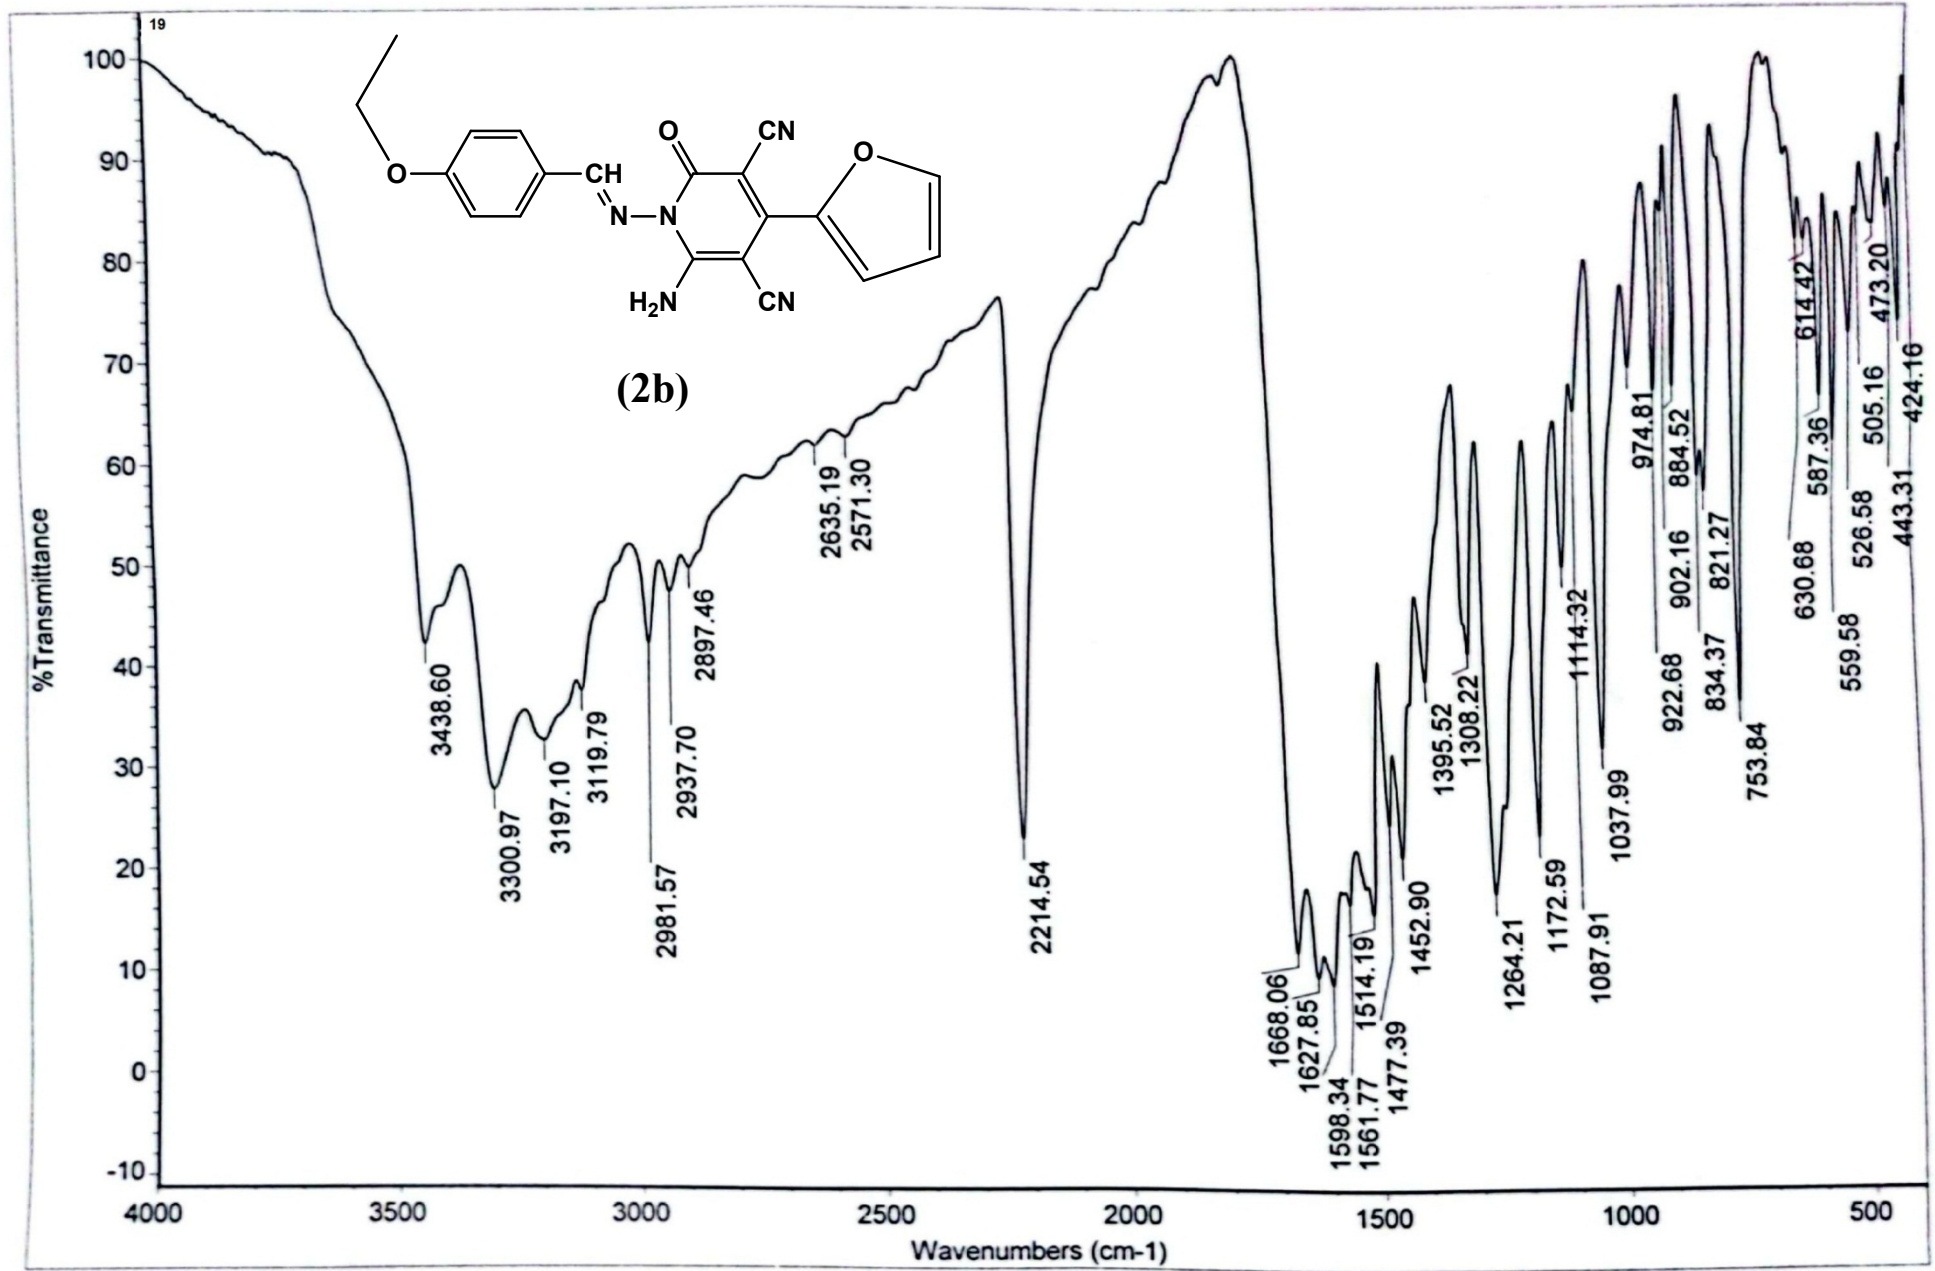

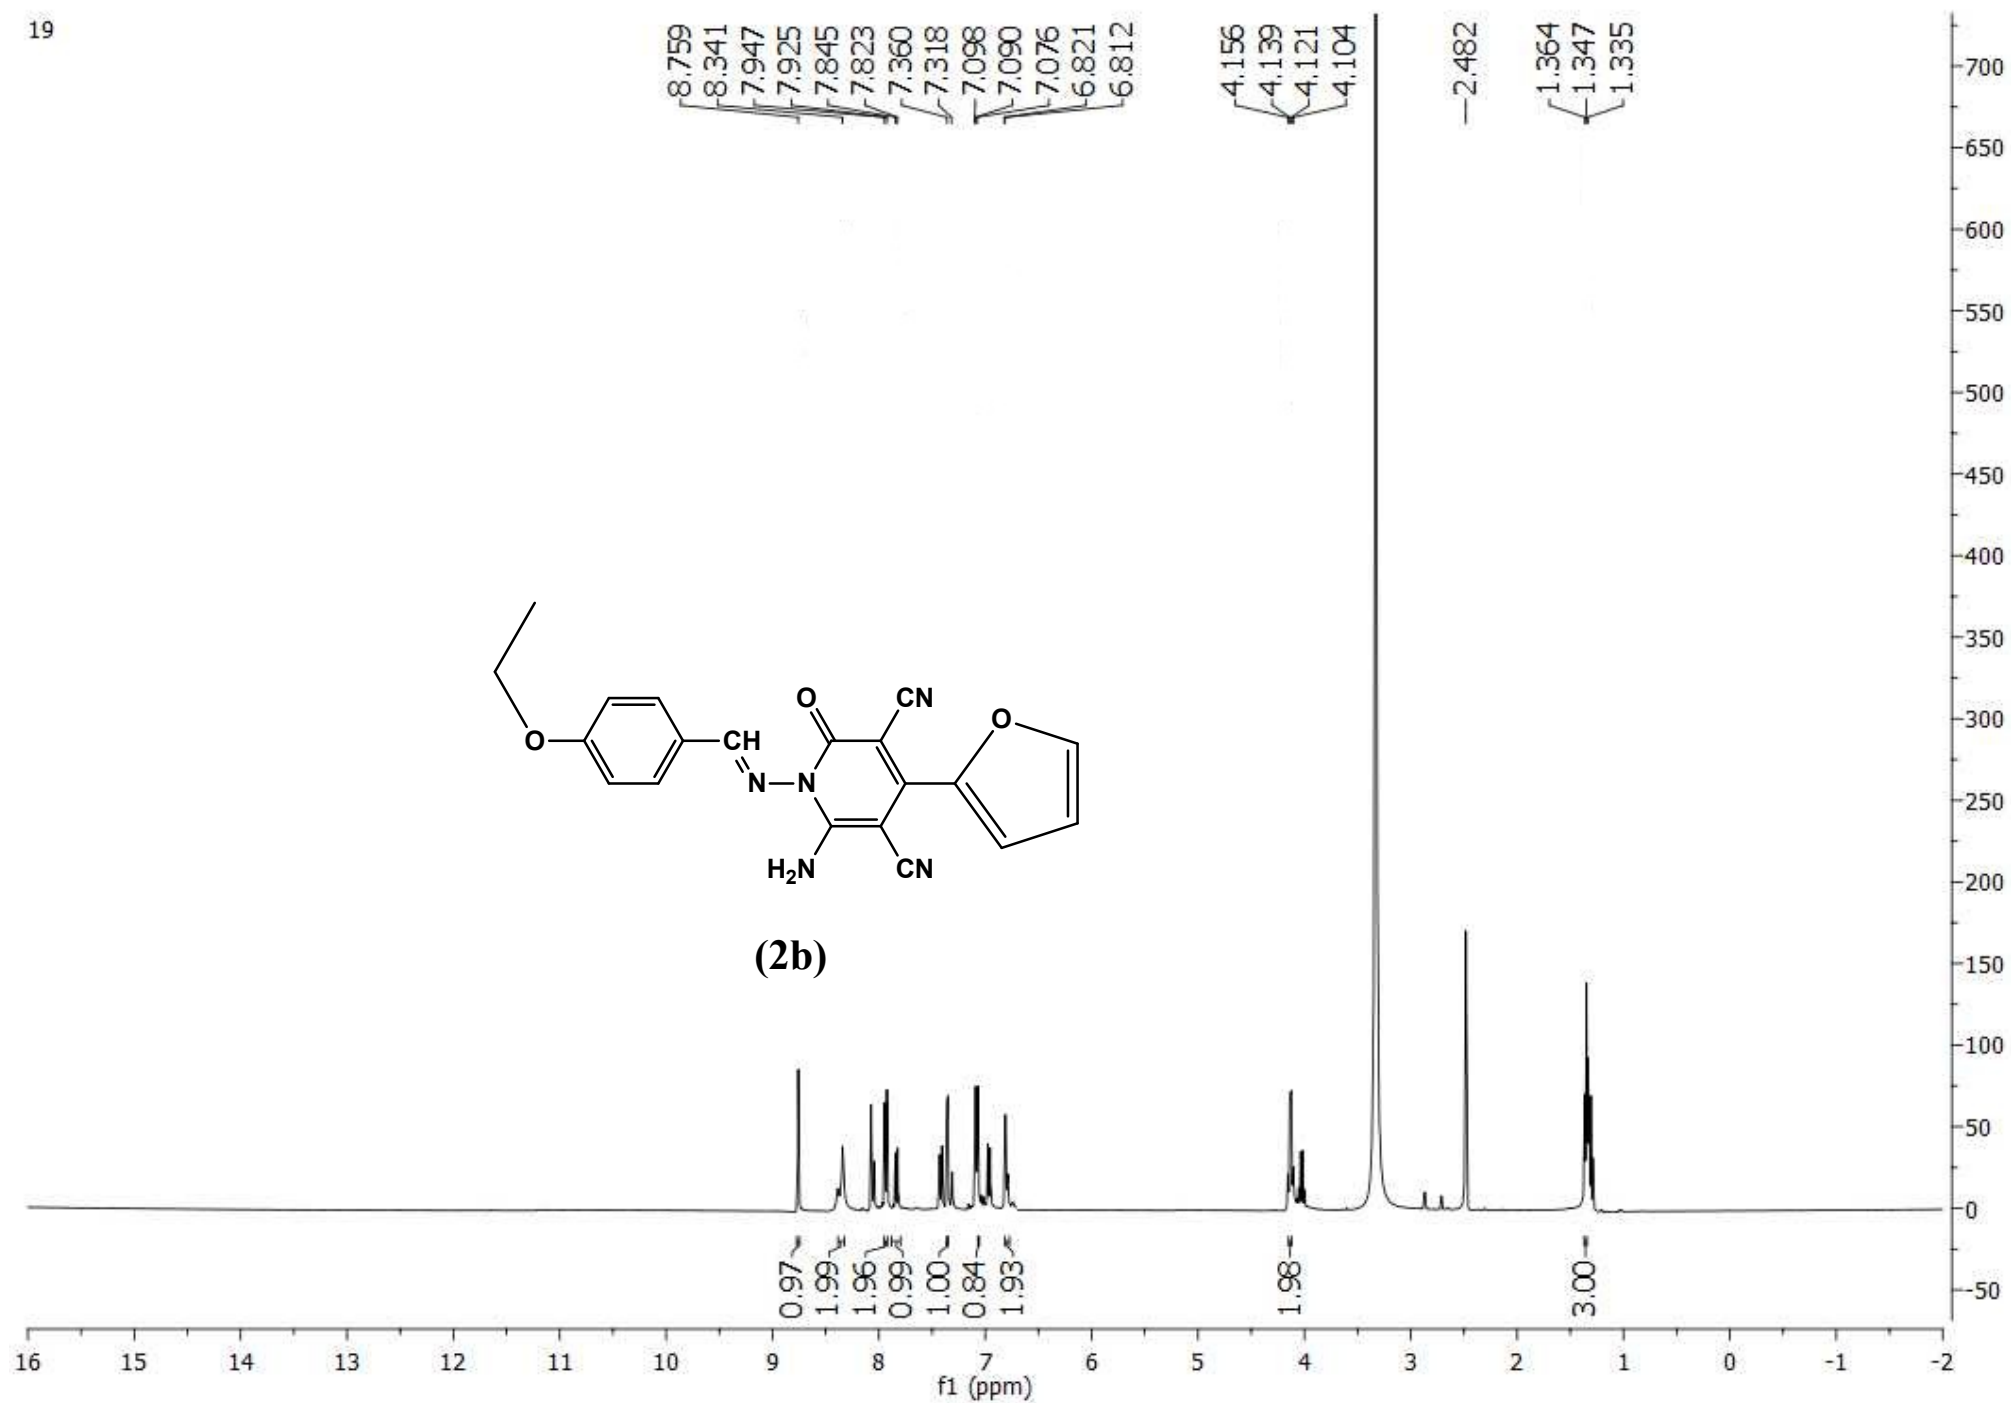



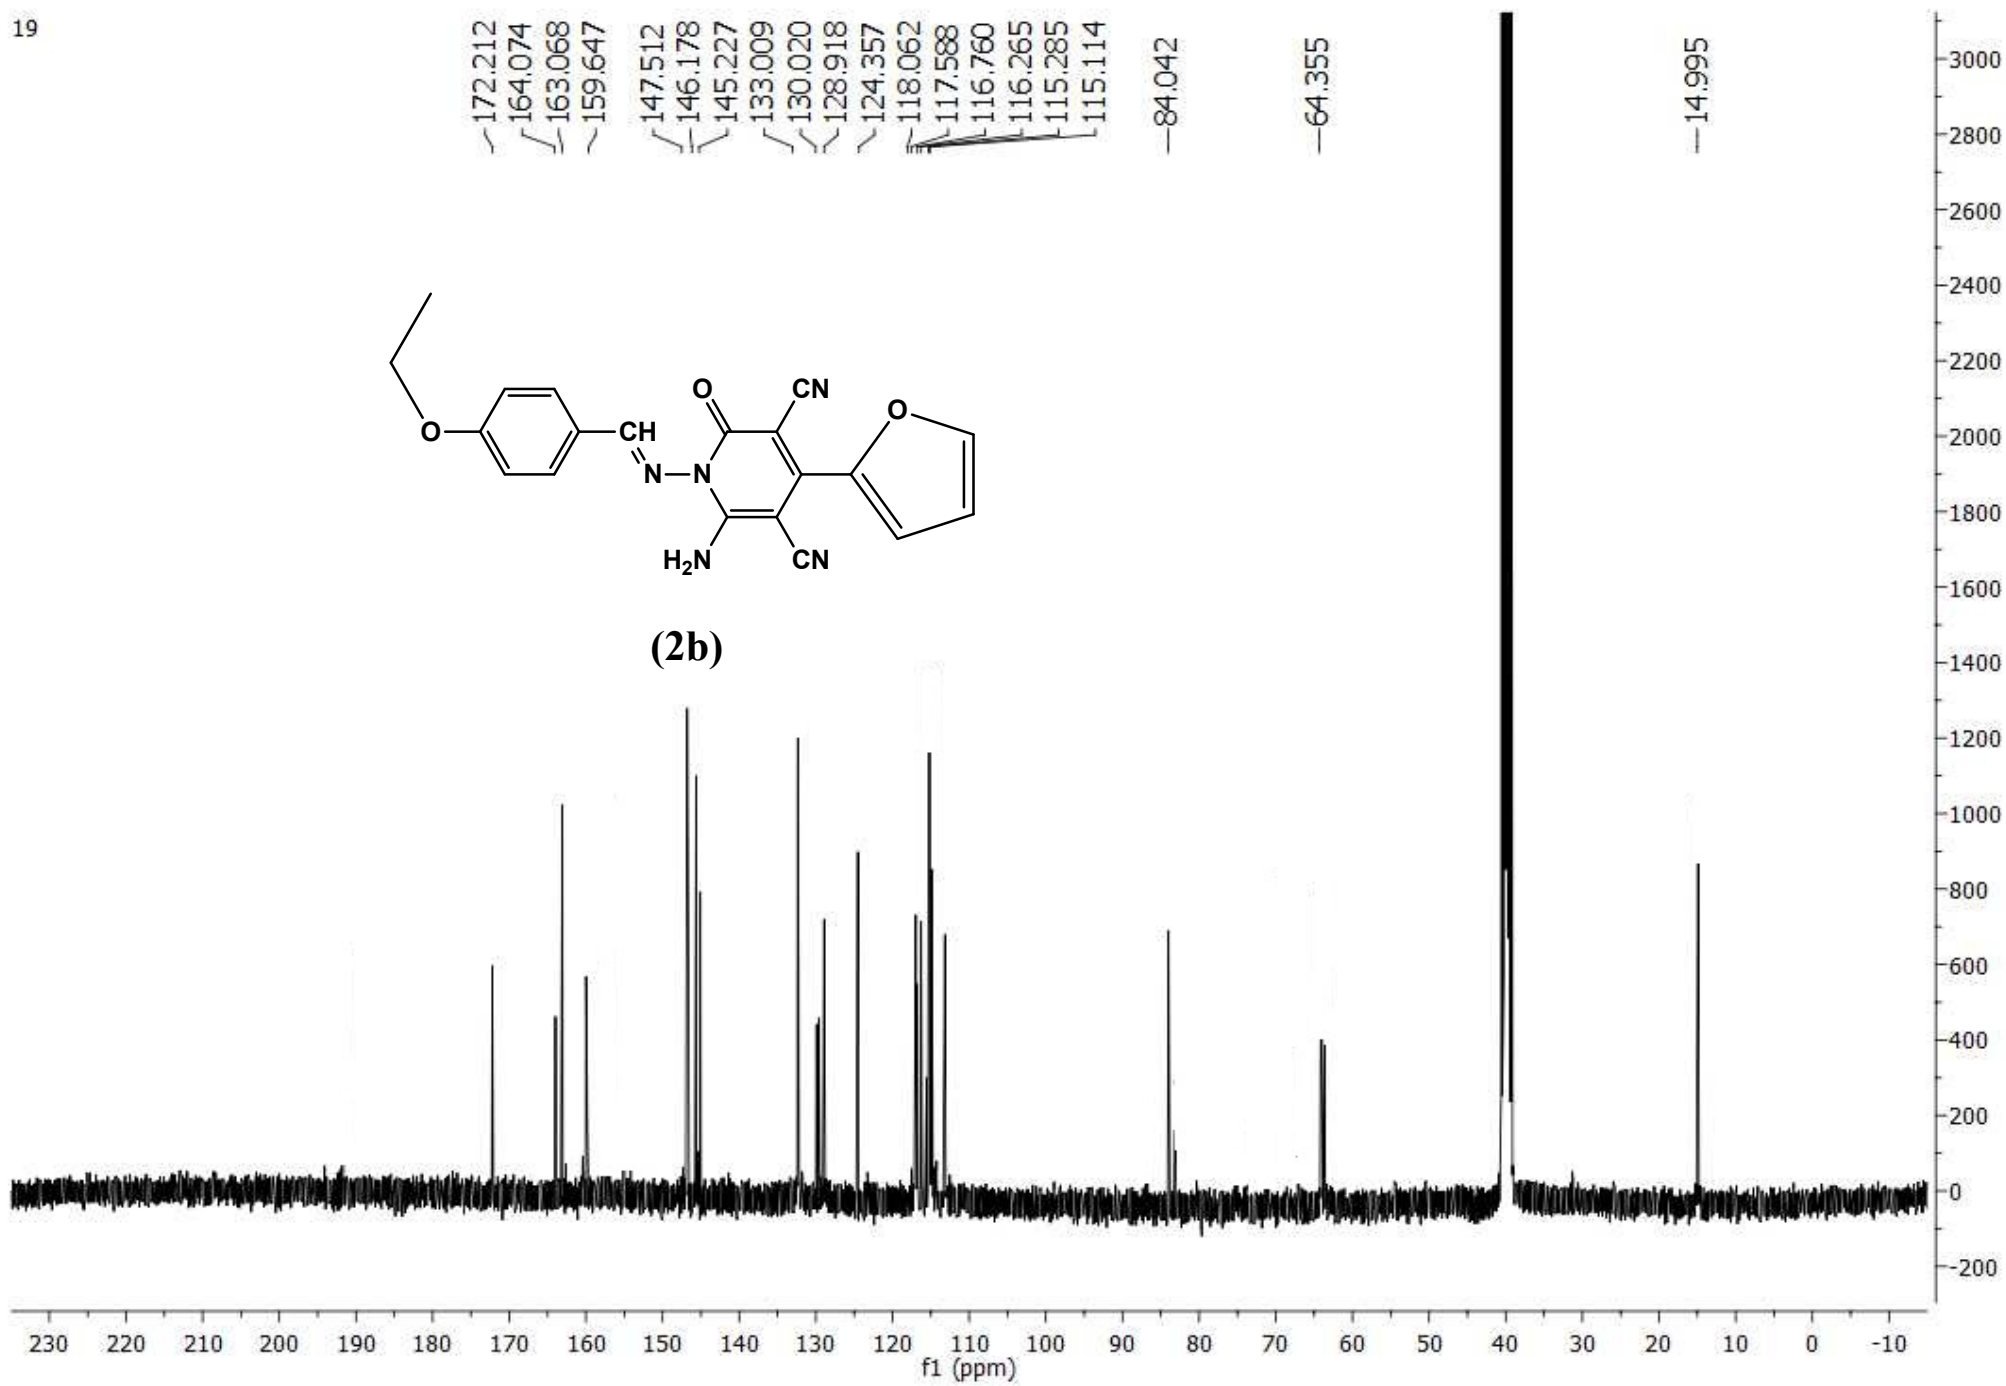

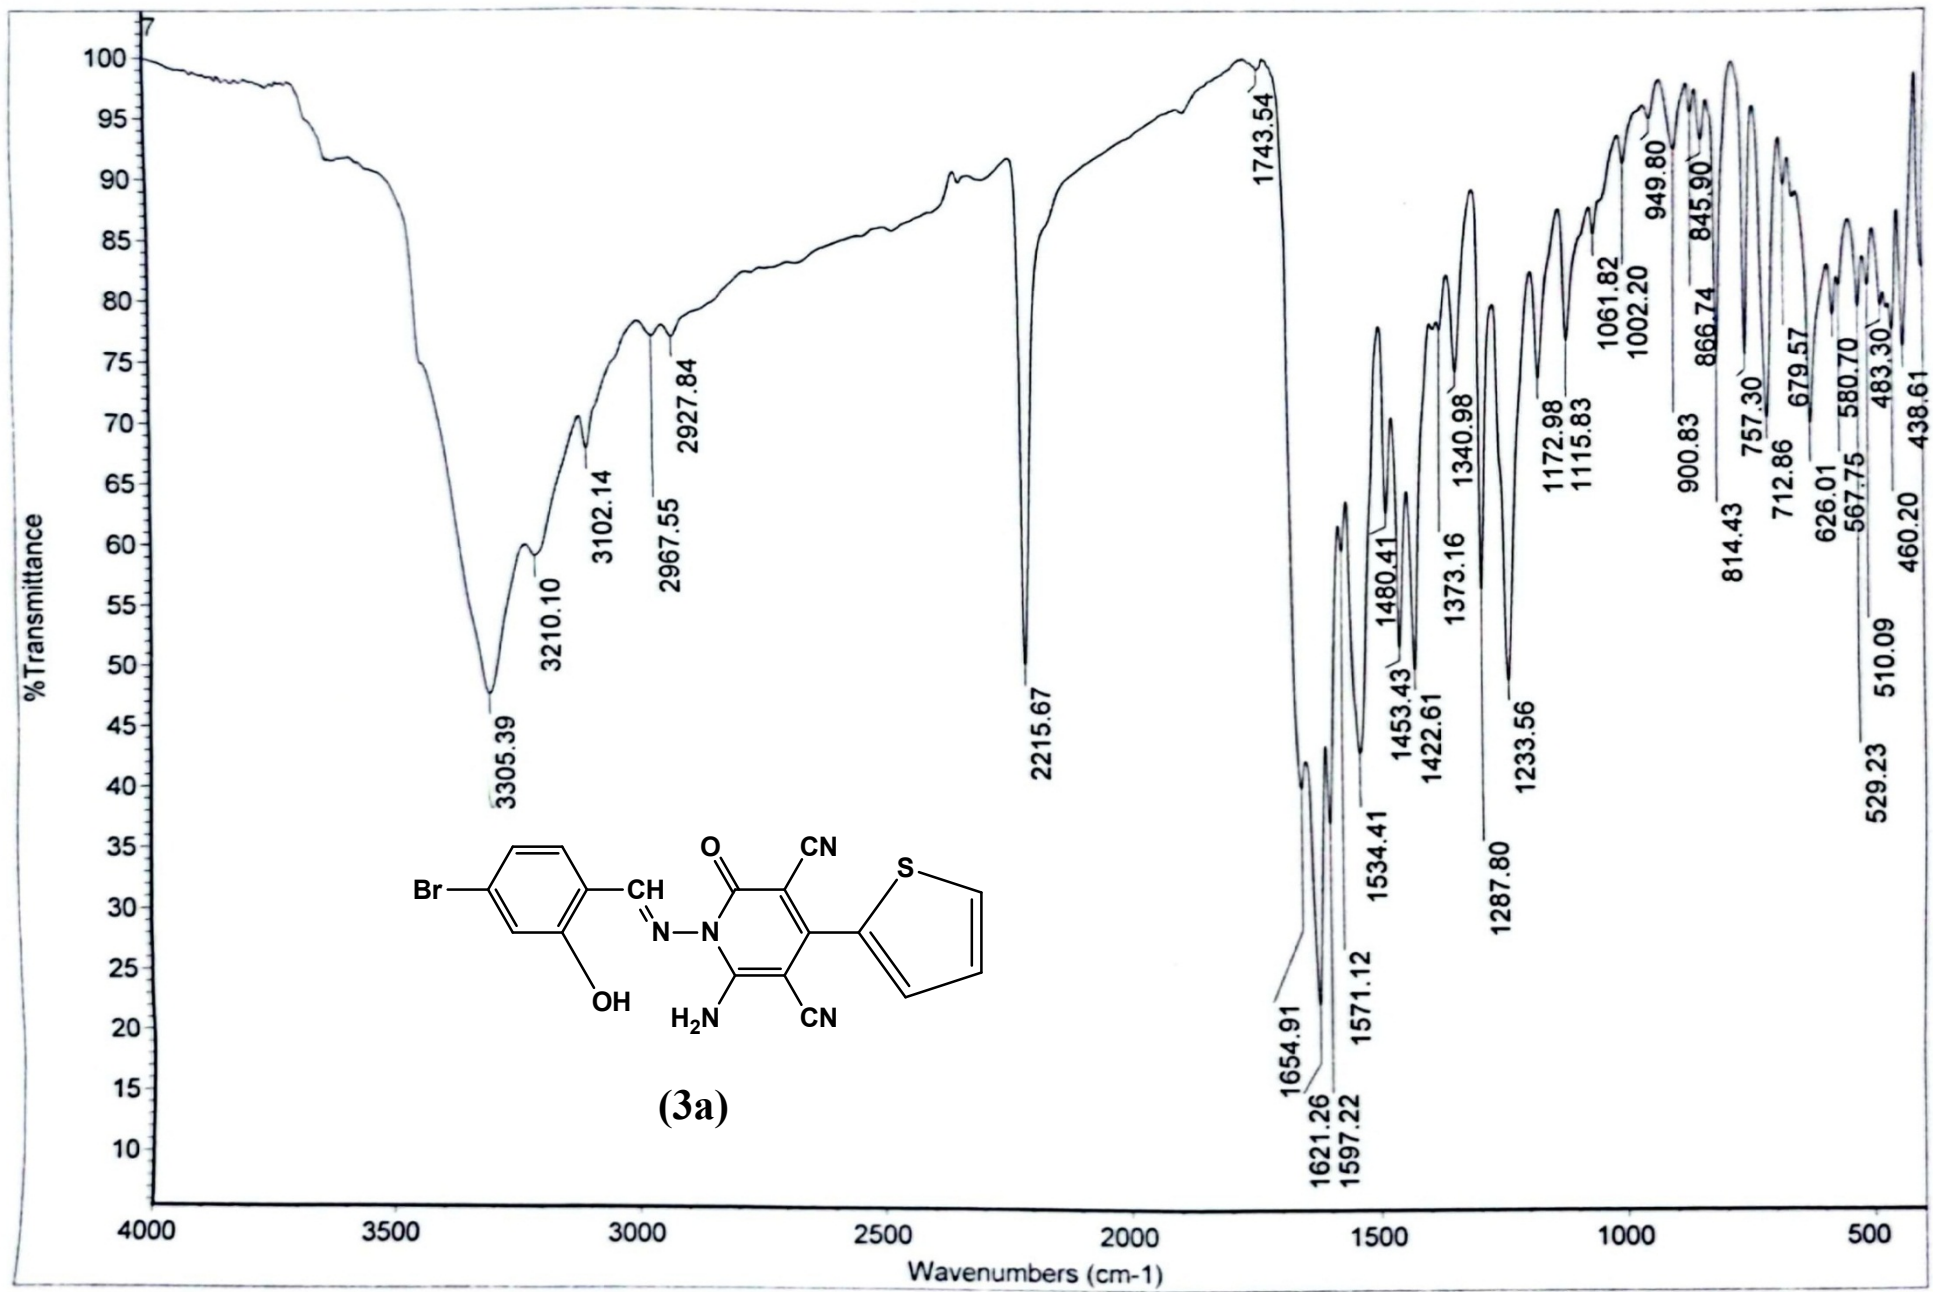

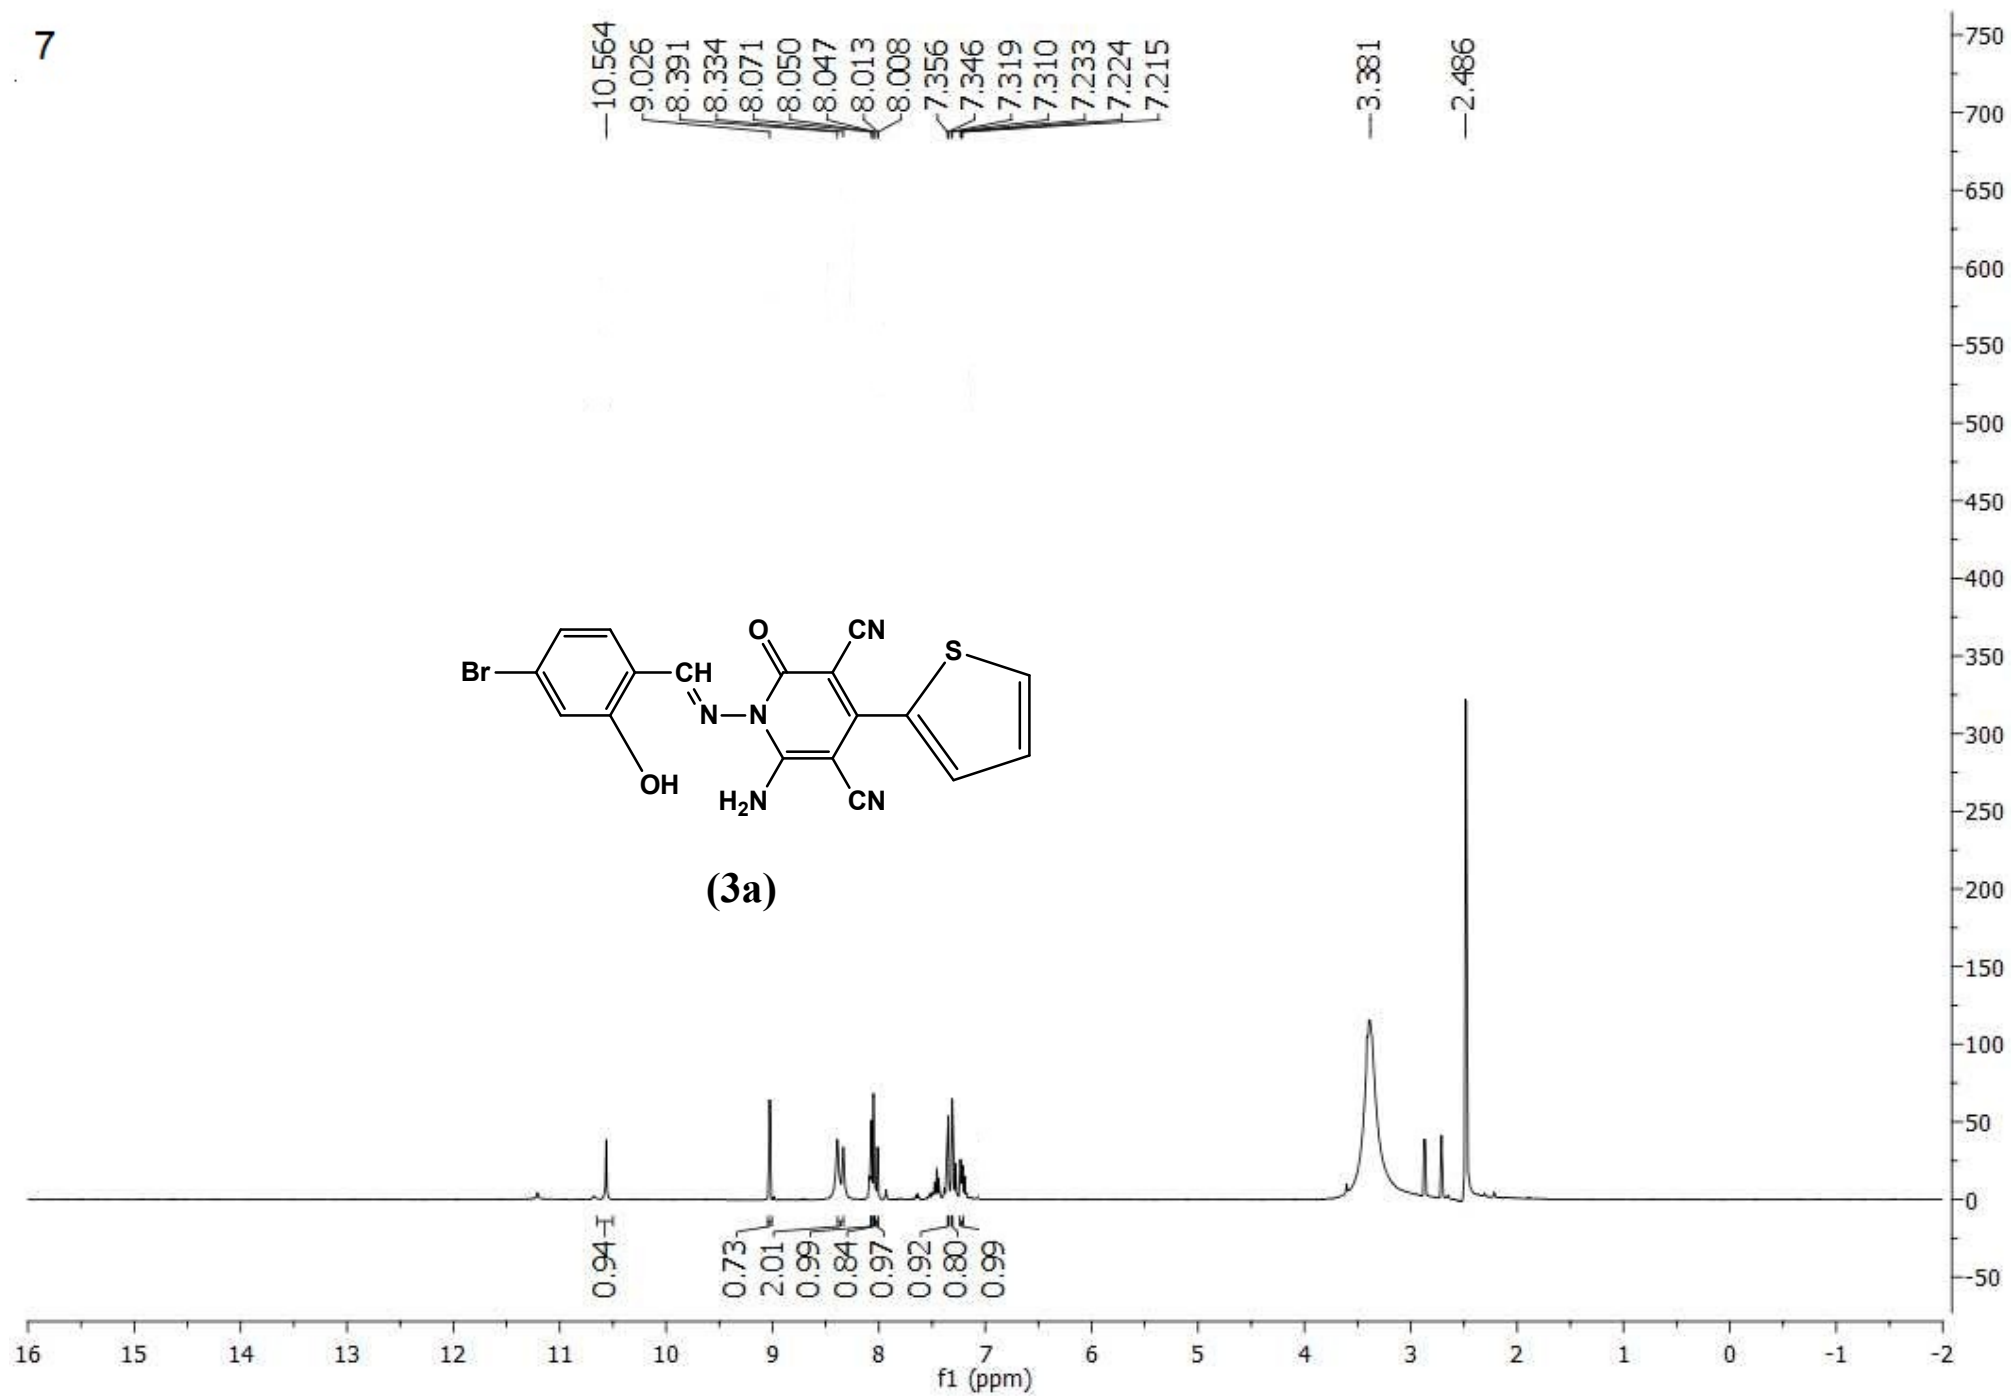

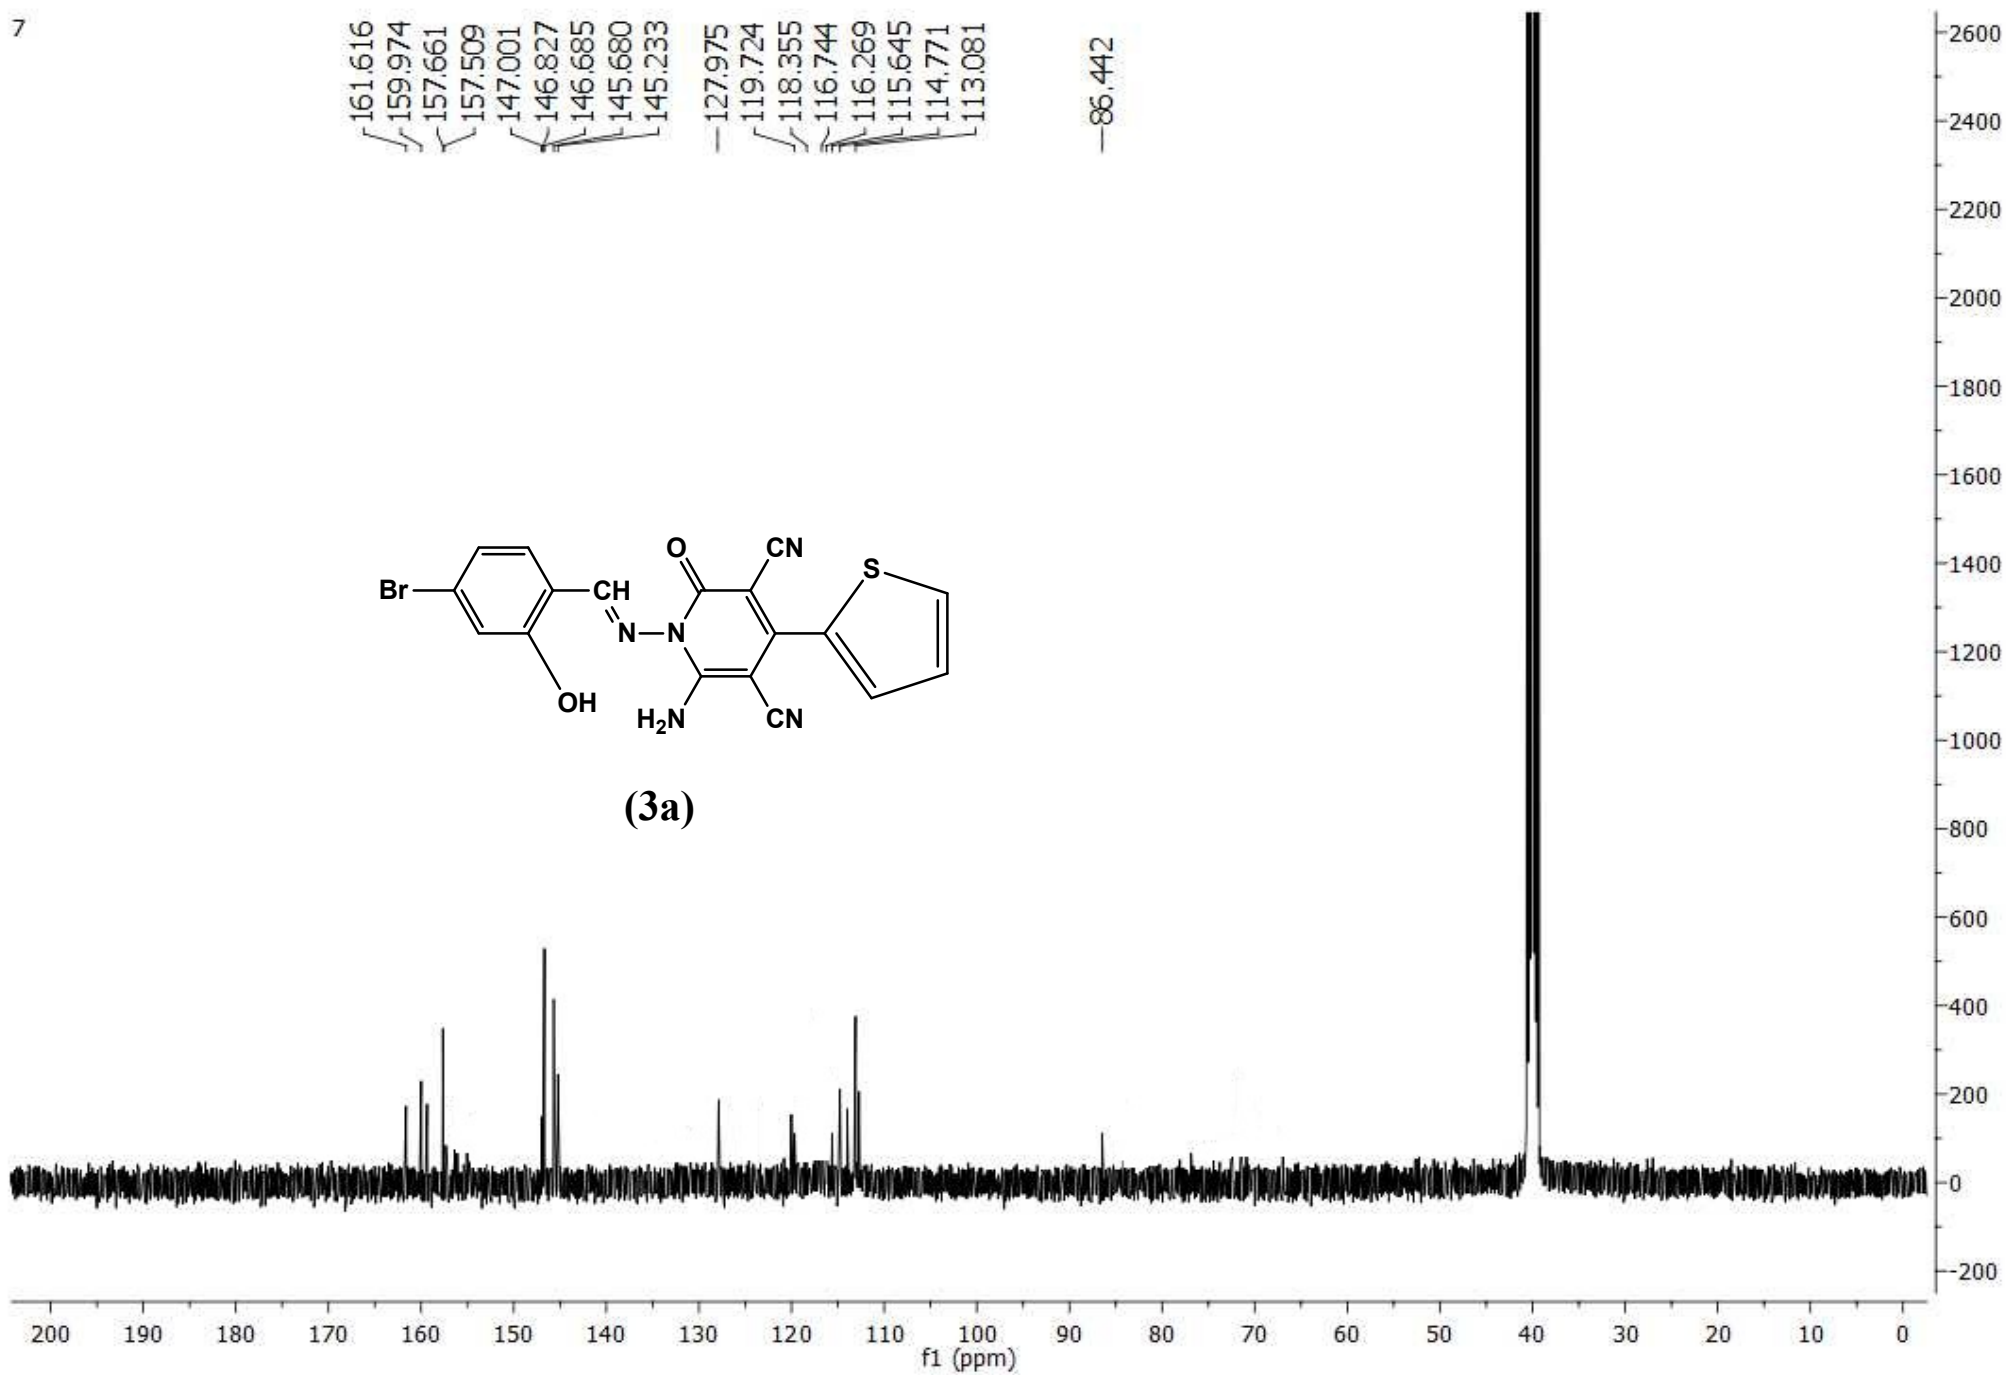

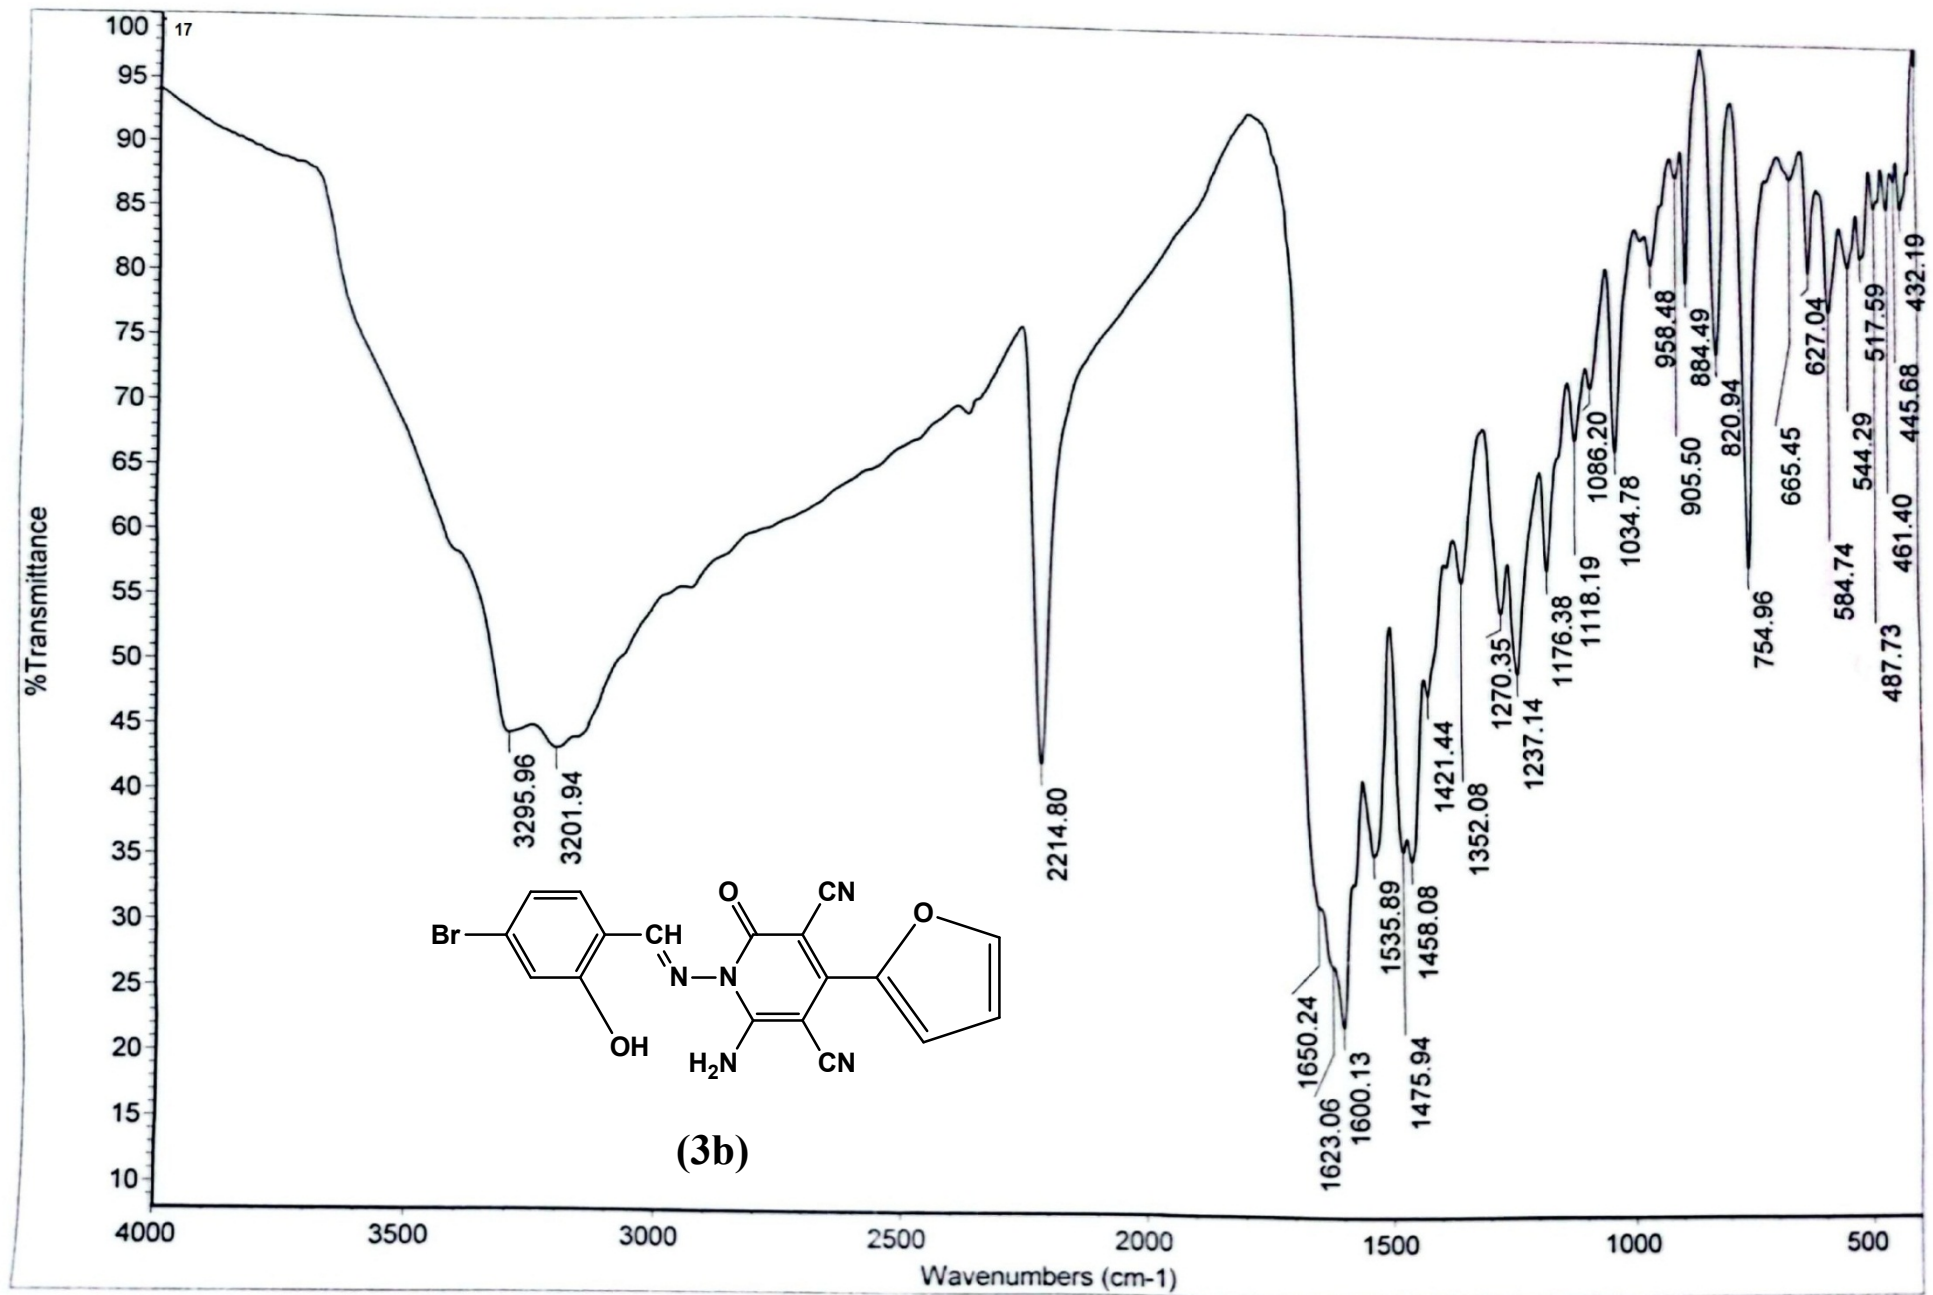

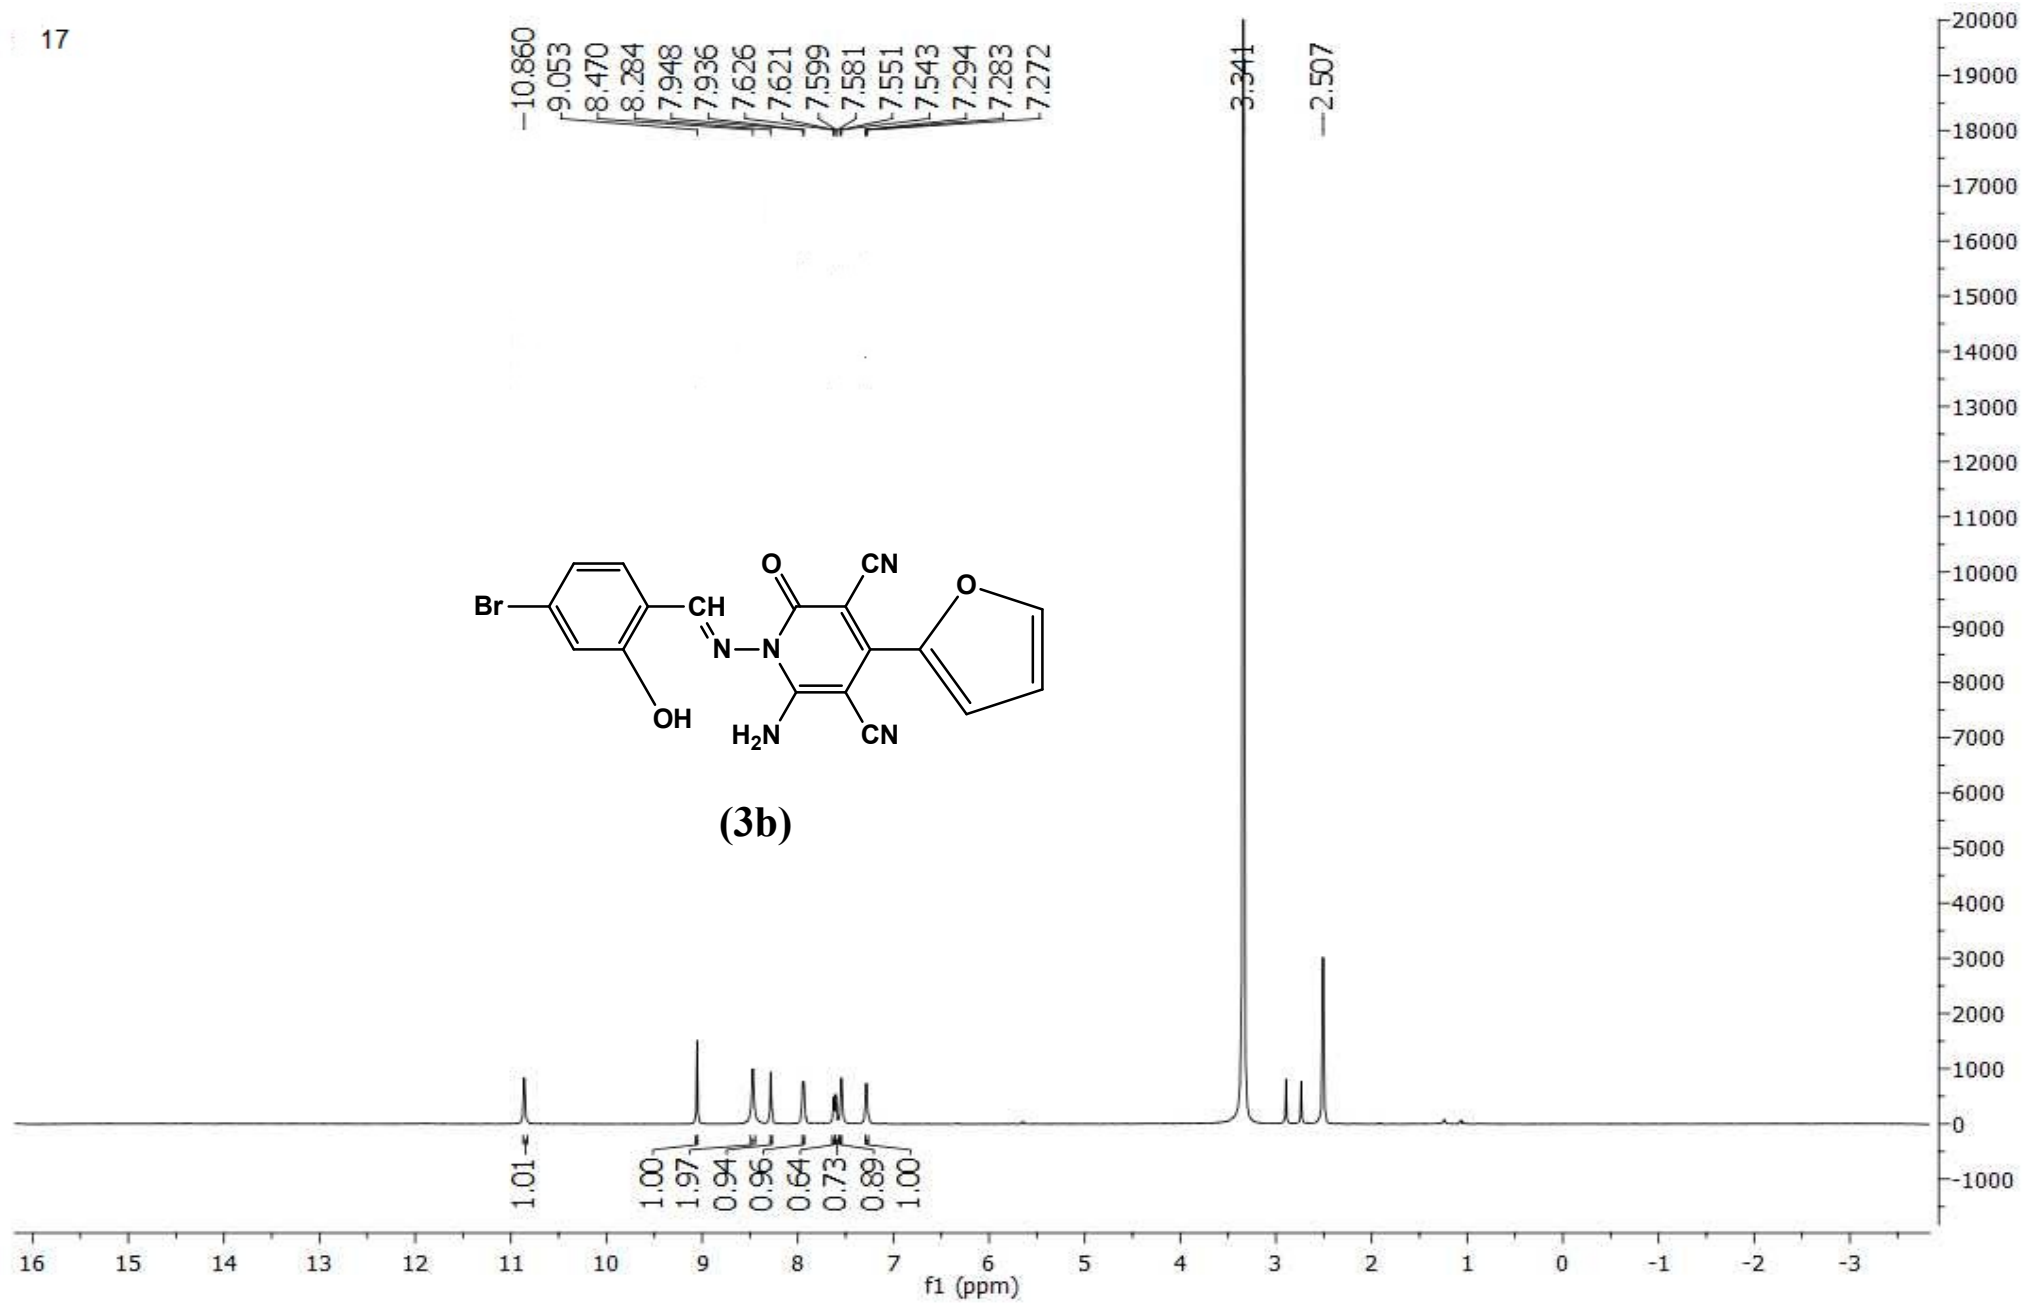

161.528  
159.905  
159.333  
157.747  
146.985  
146.777  
146.505  
145.778  
145.148  
141.836  
132.320  
124.595  
120.016  
117.063  
116.744  
115.645  
115.278  
—83.101

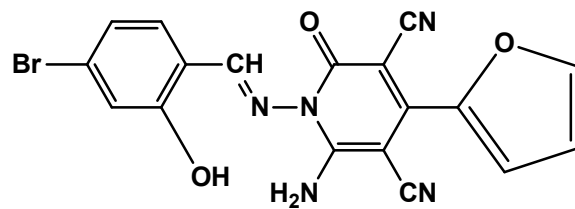

(3b)

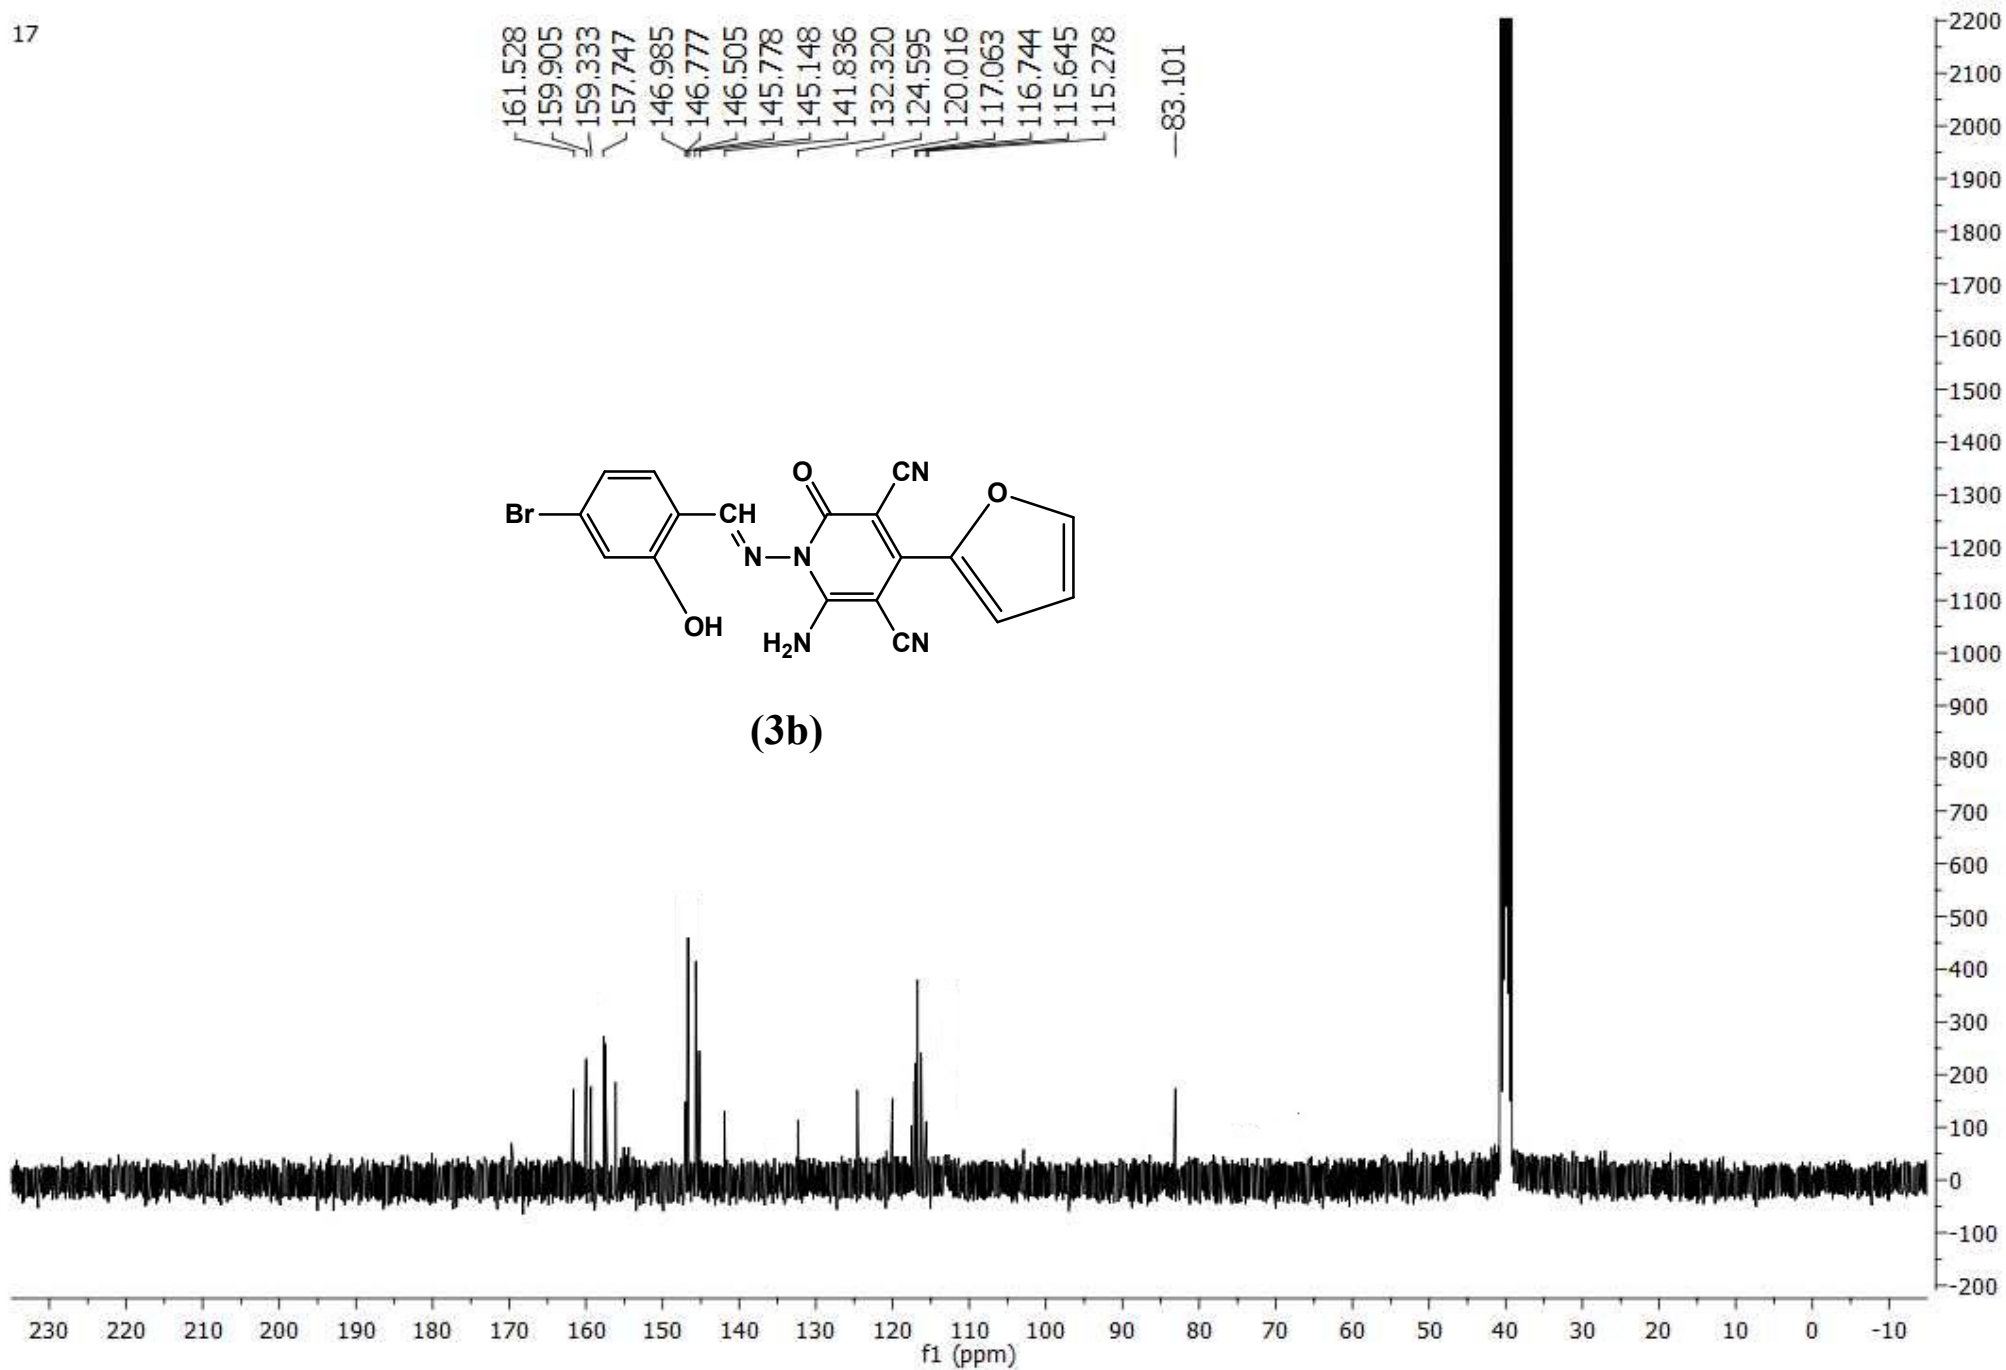

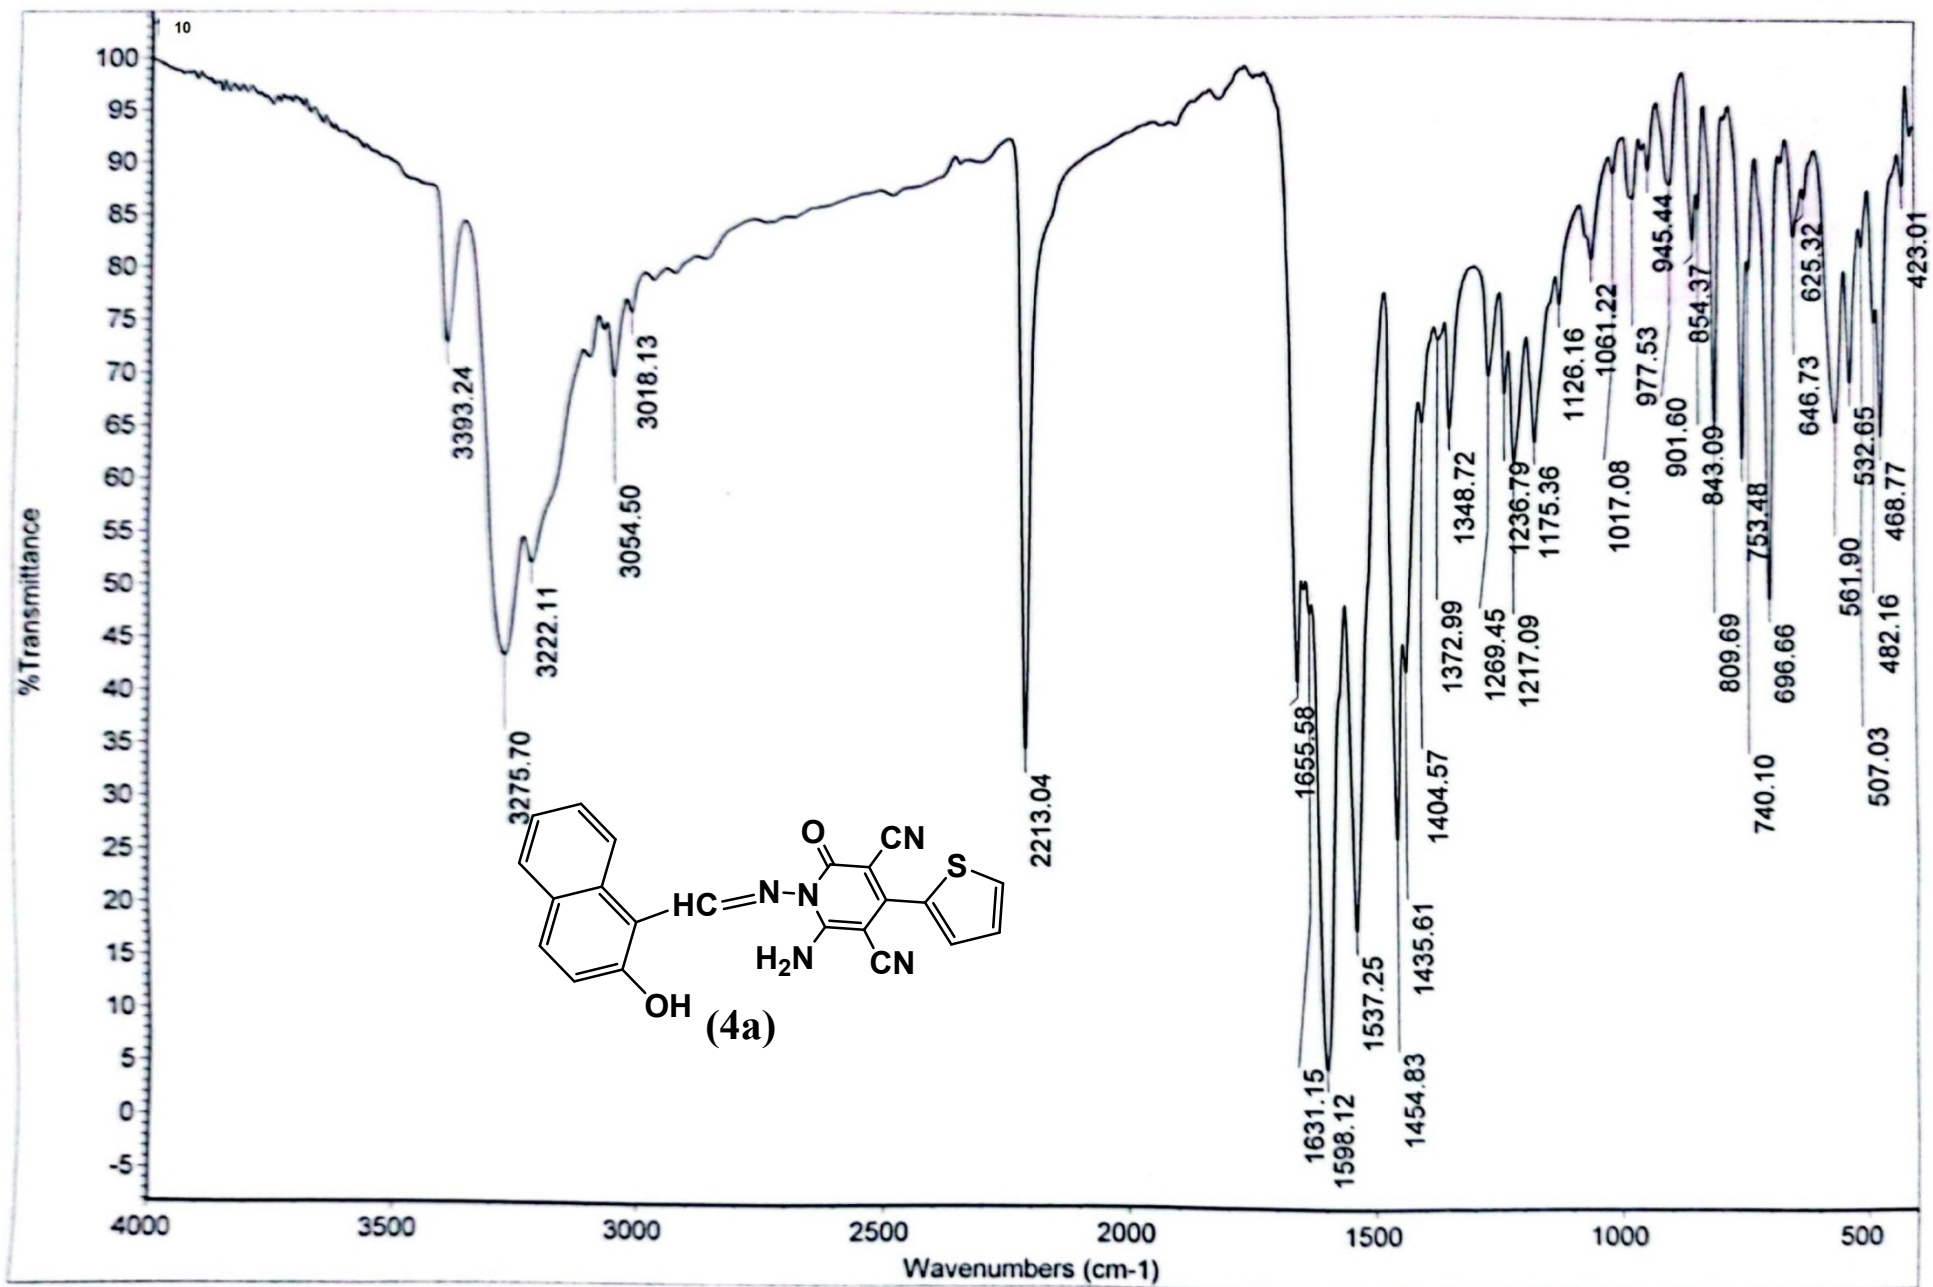



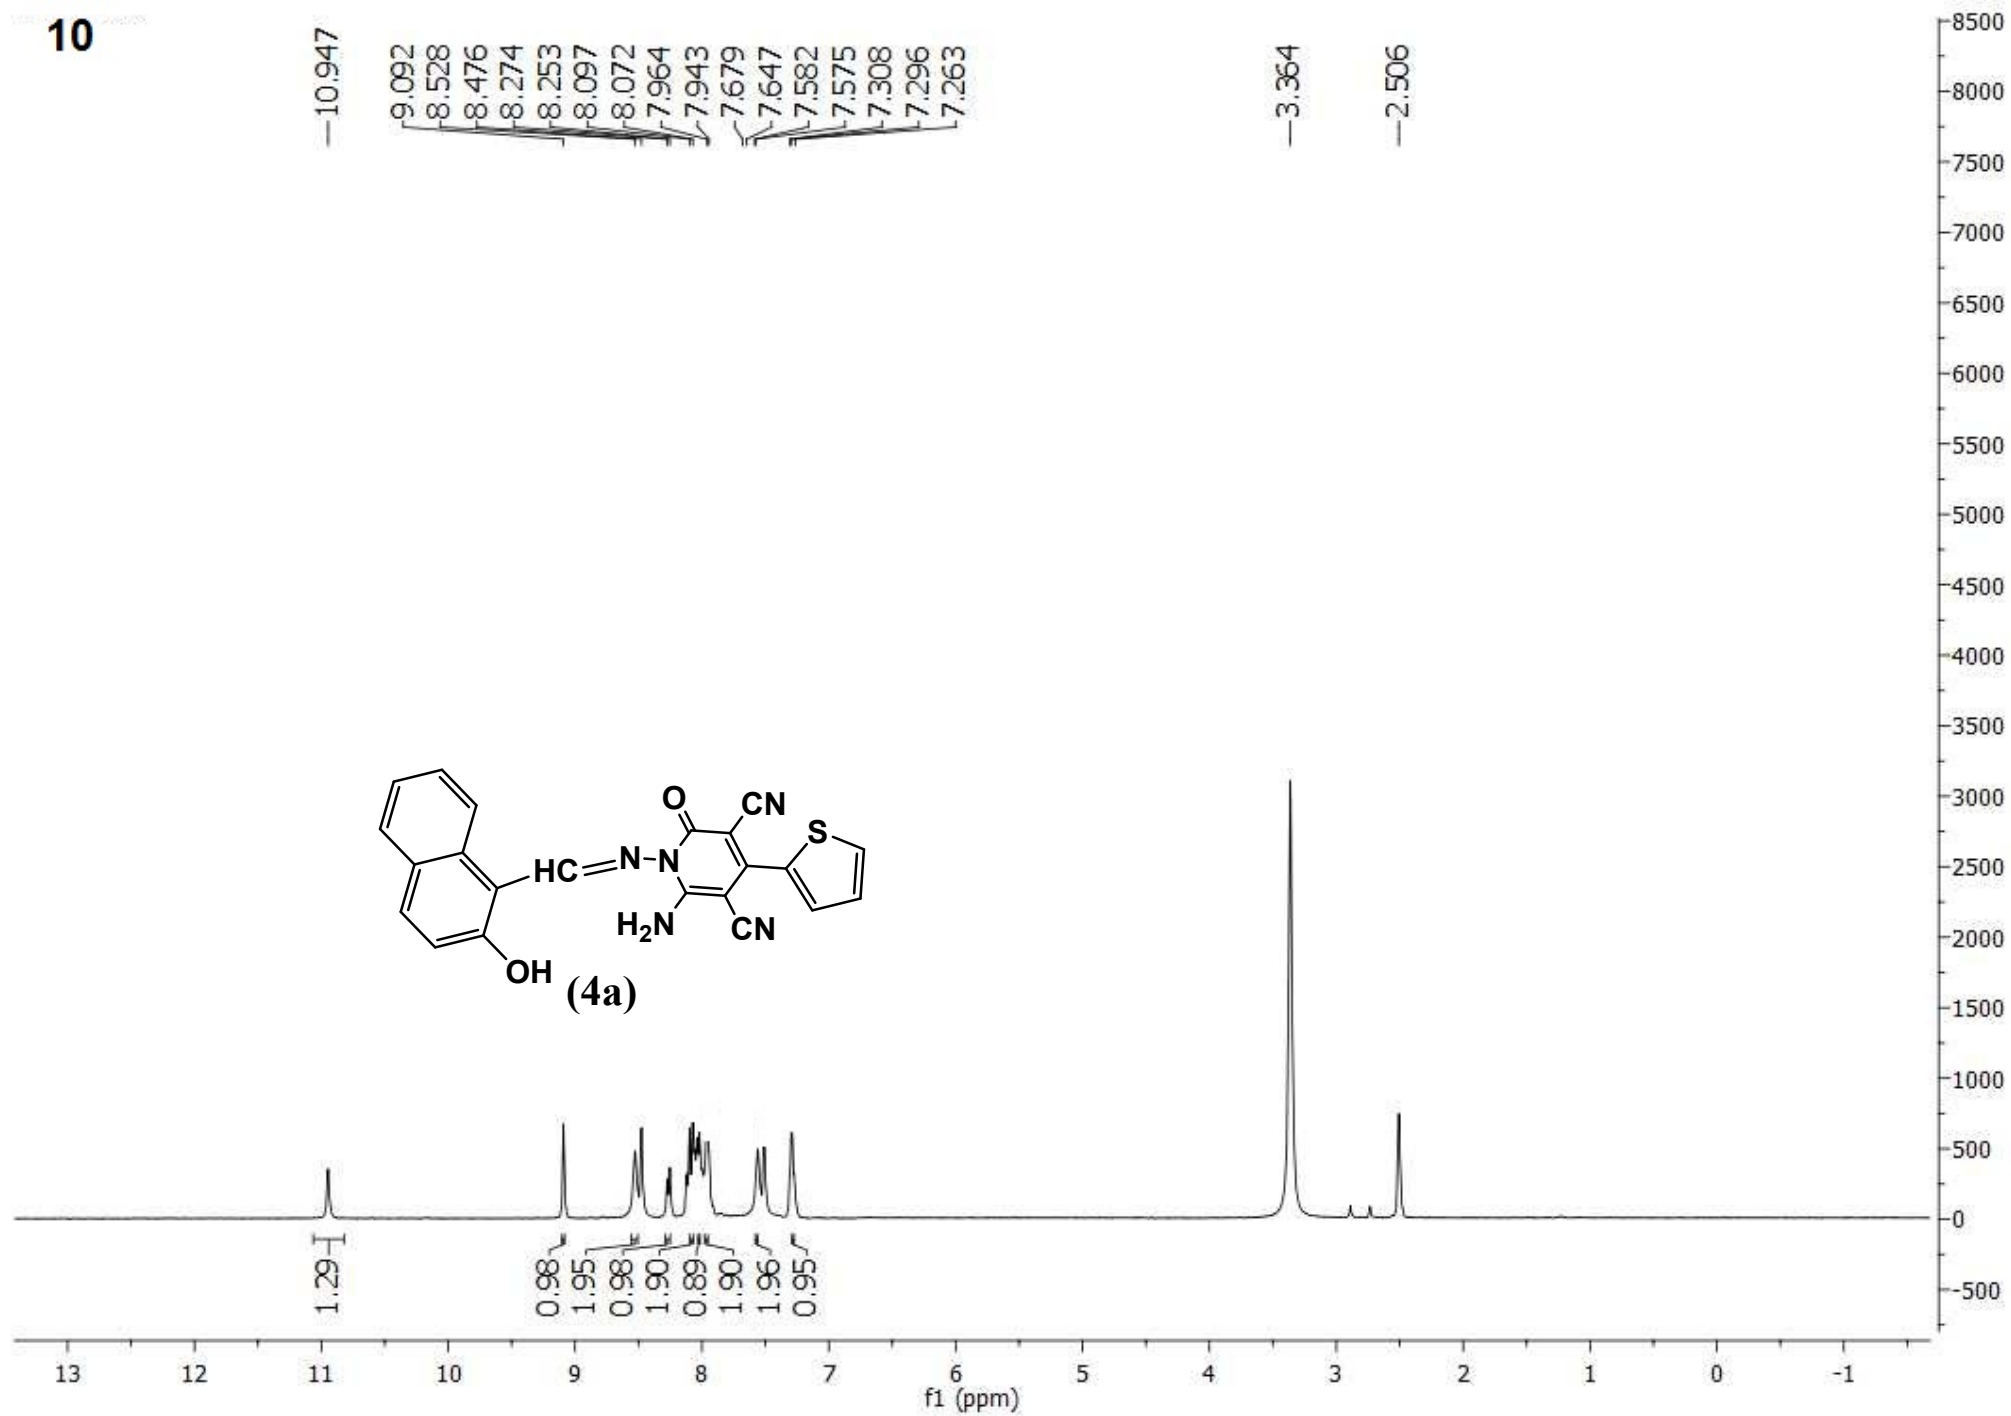

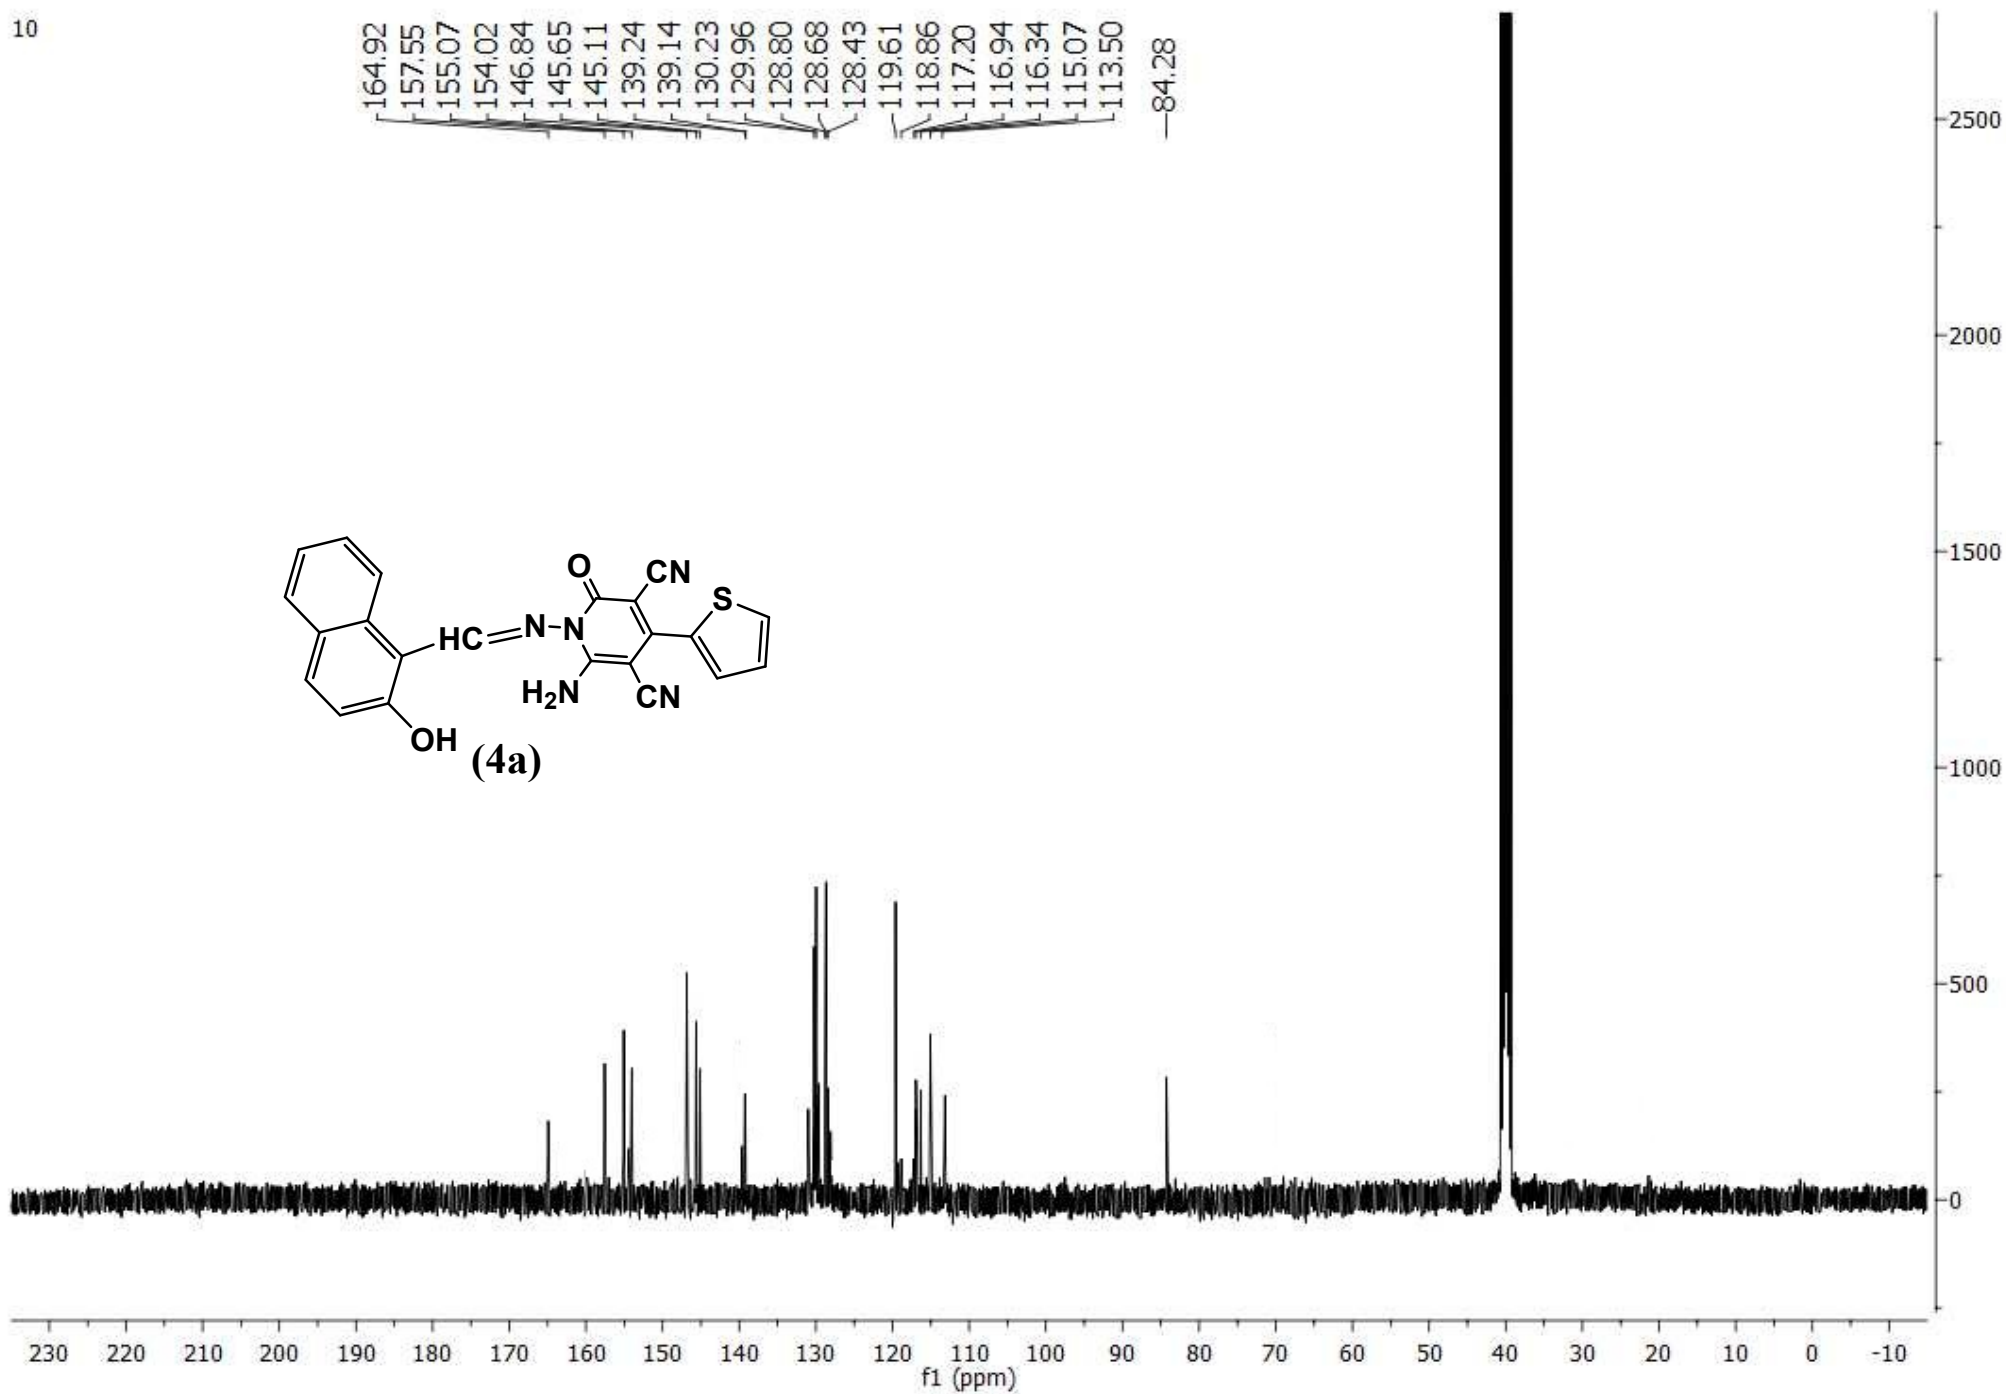

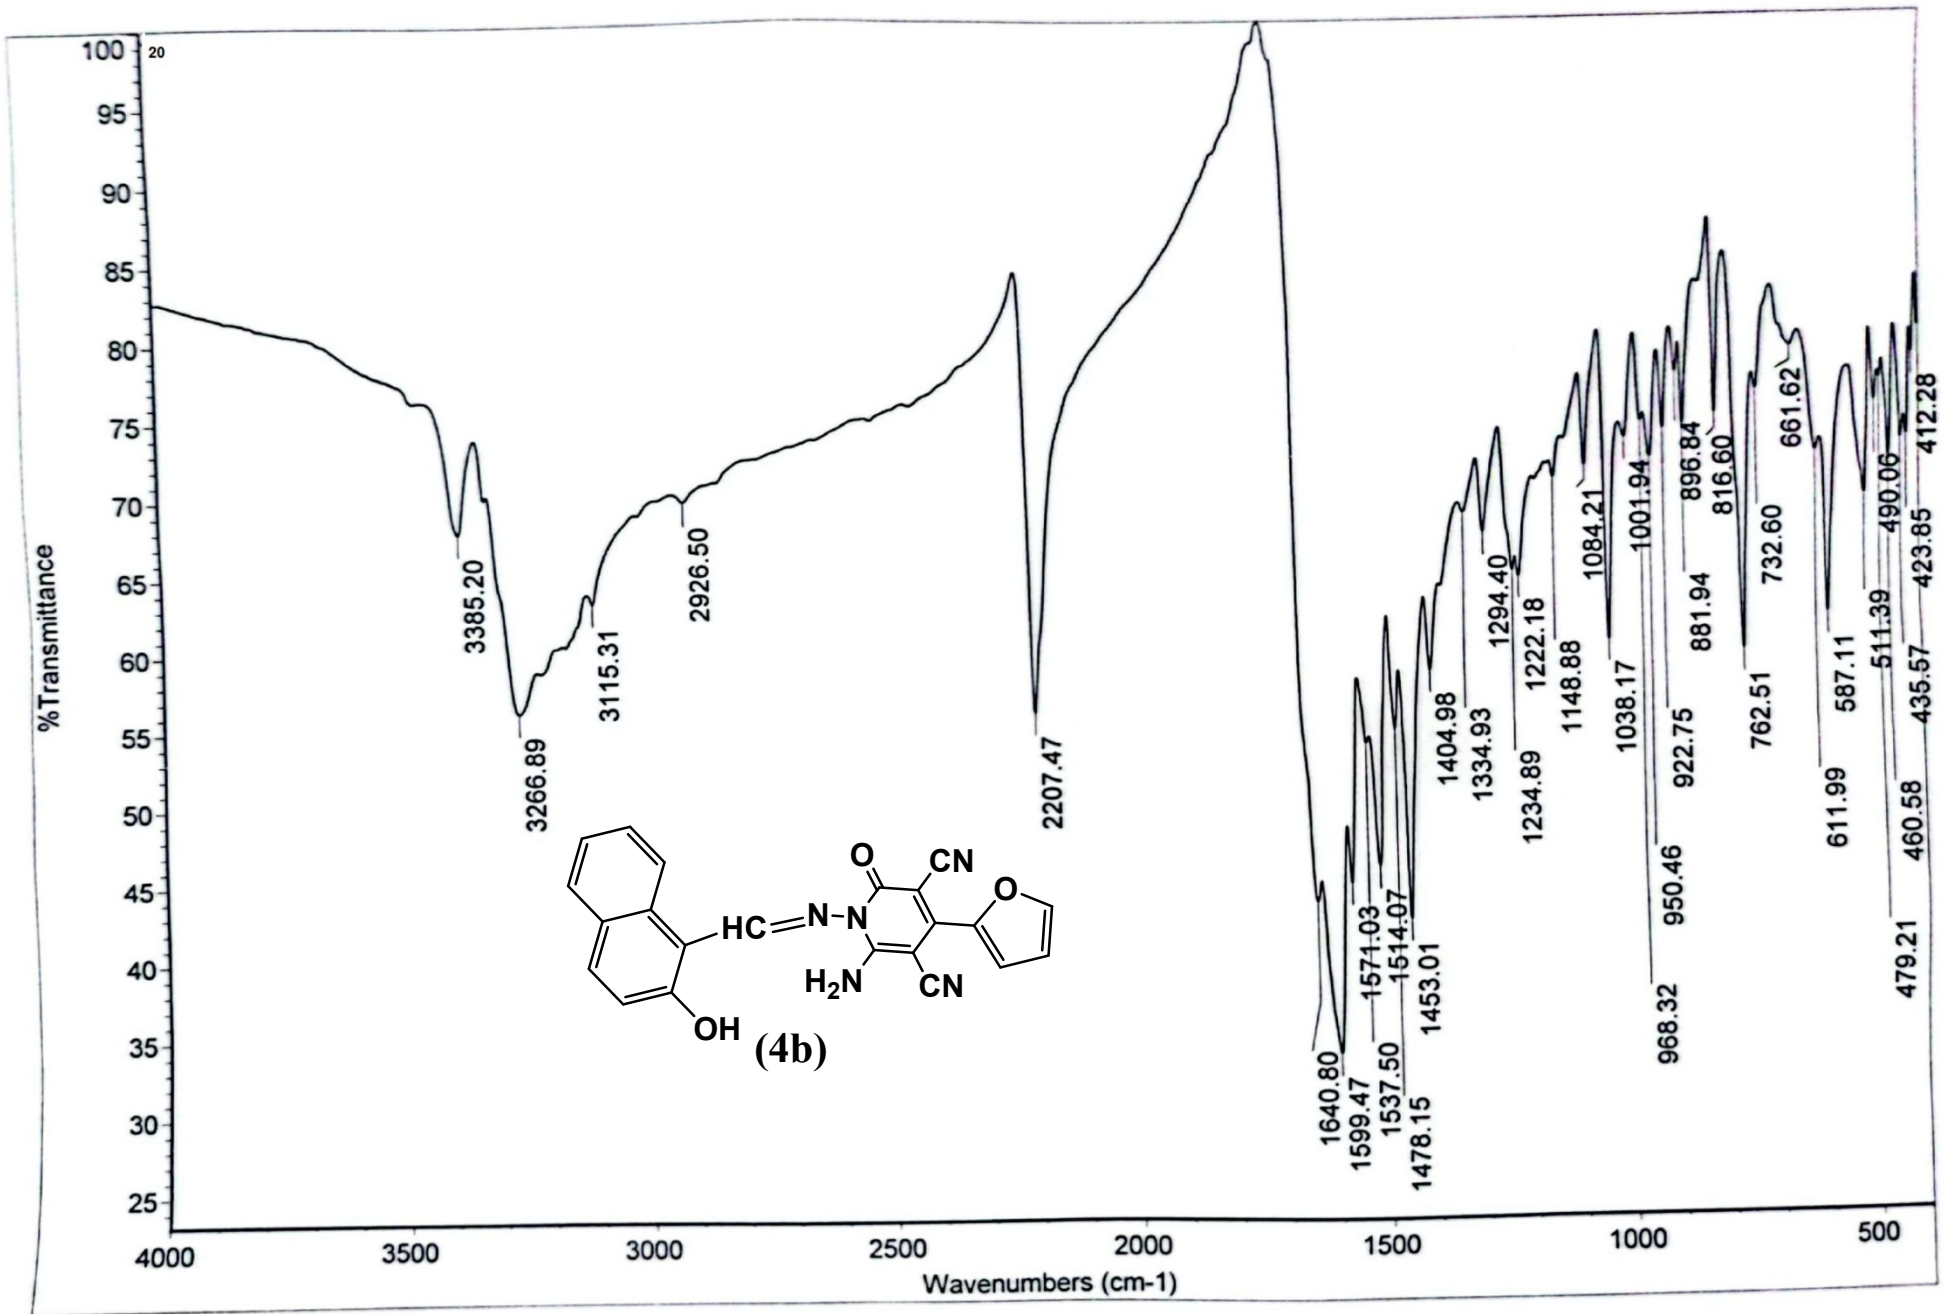

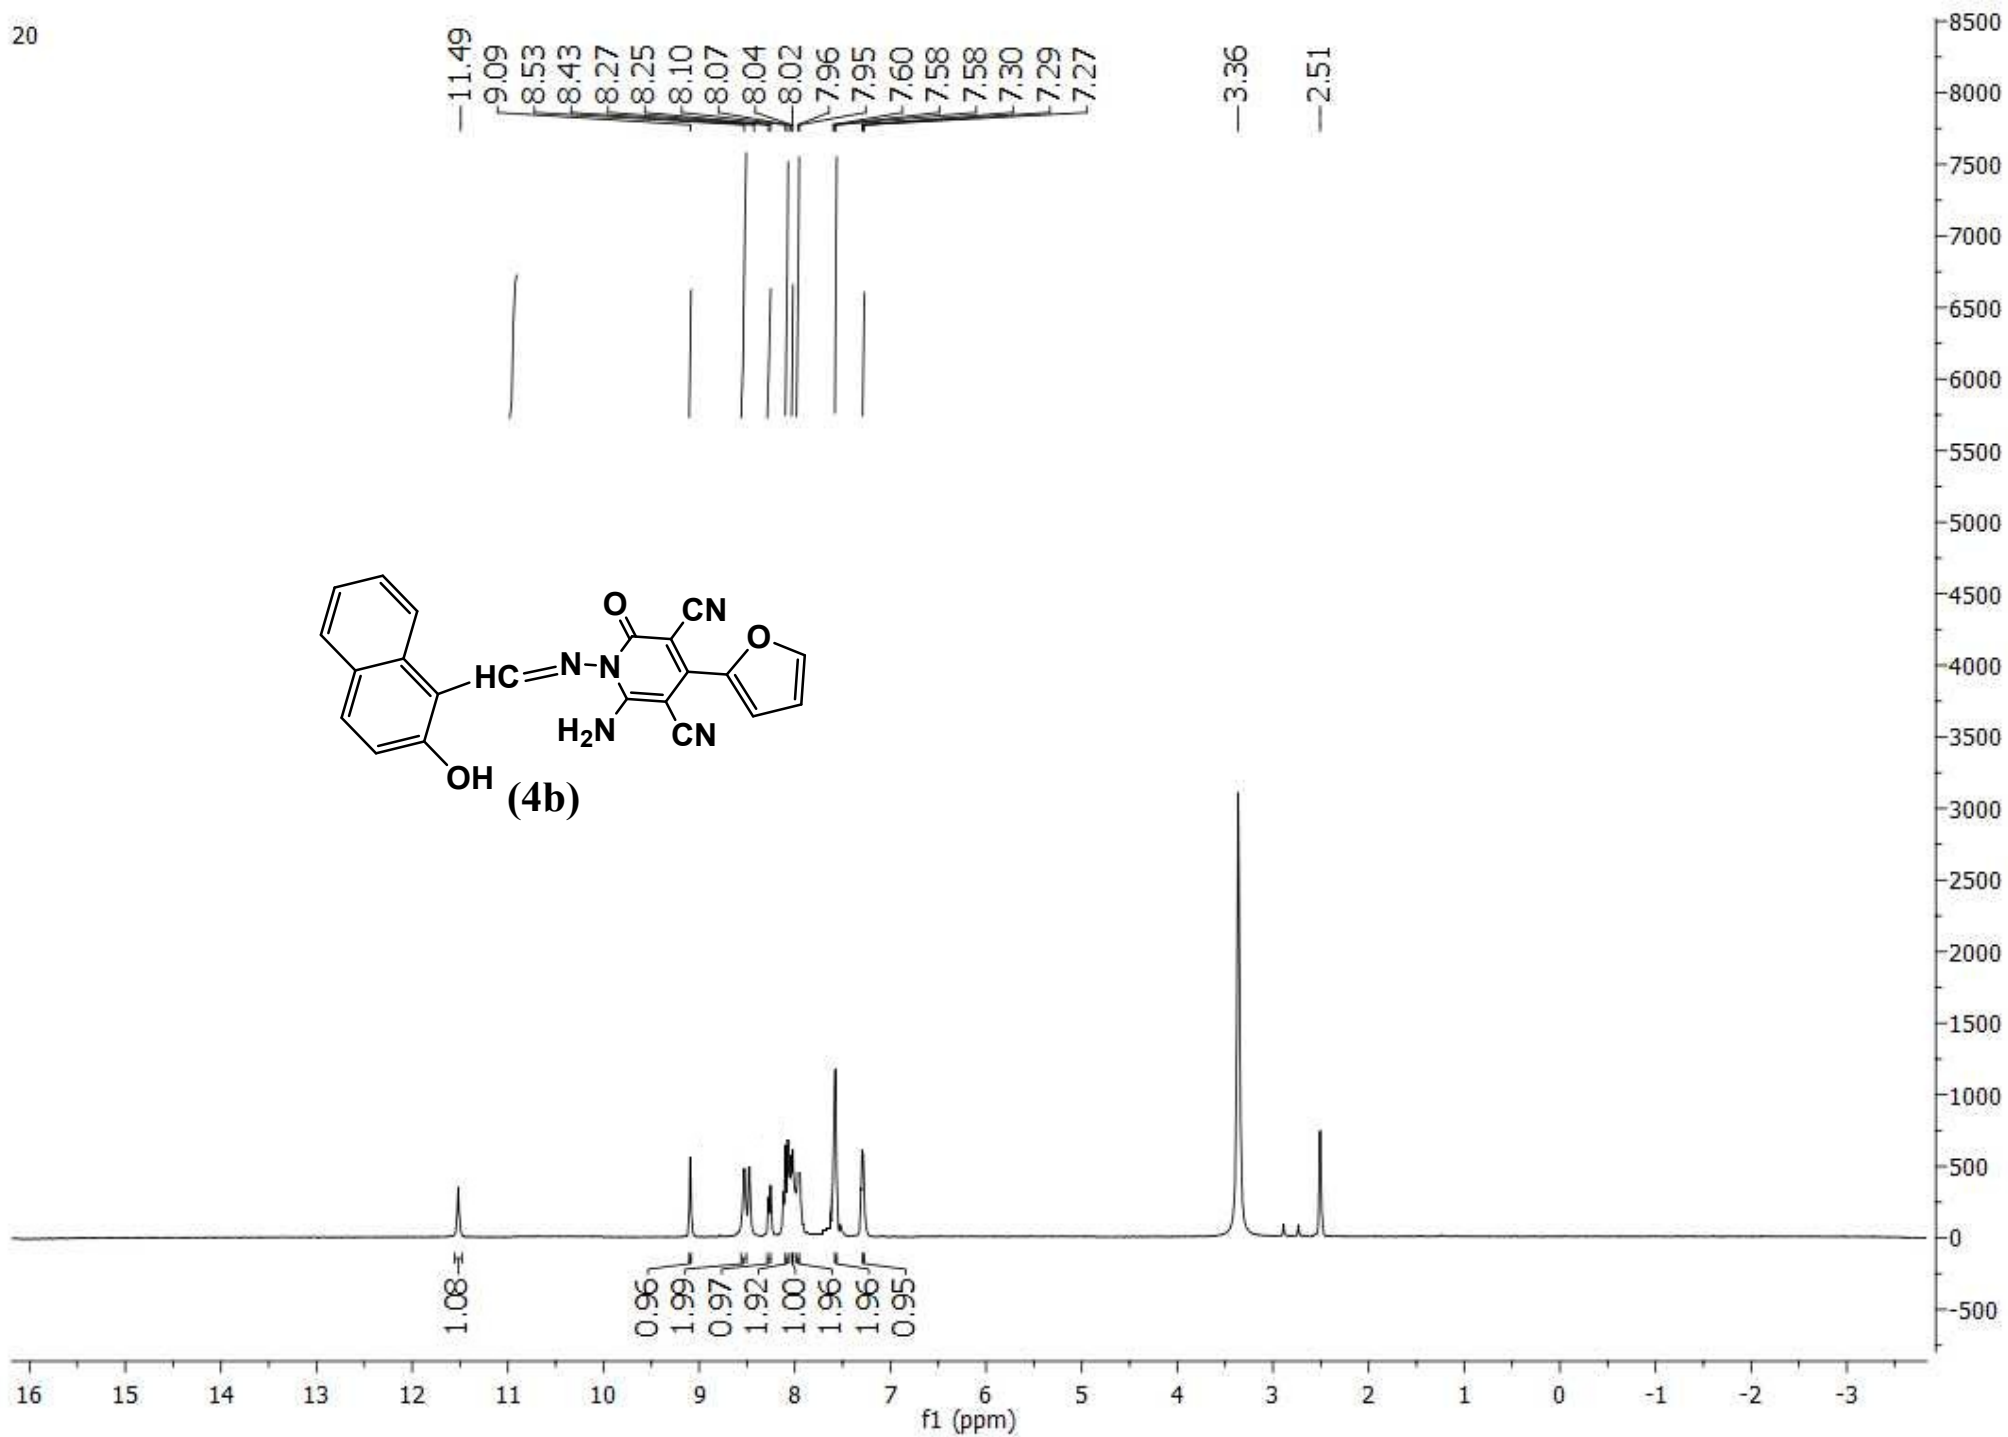

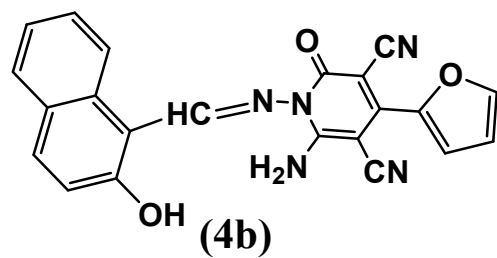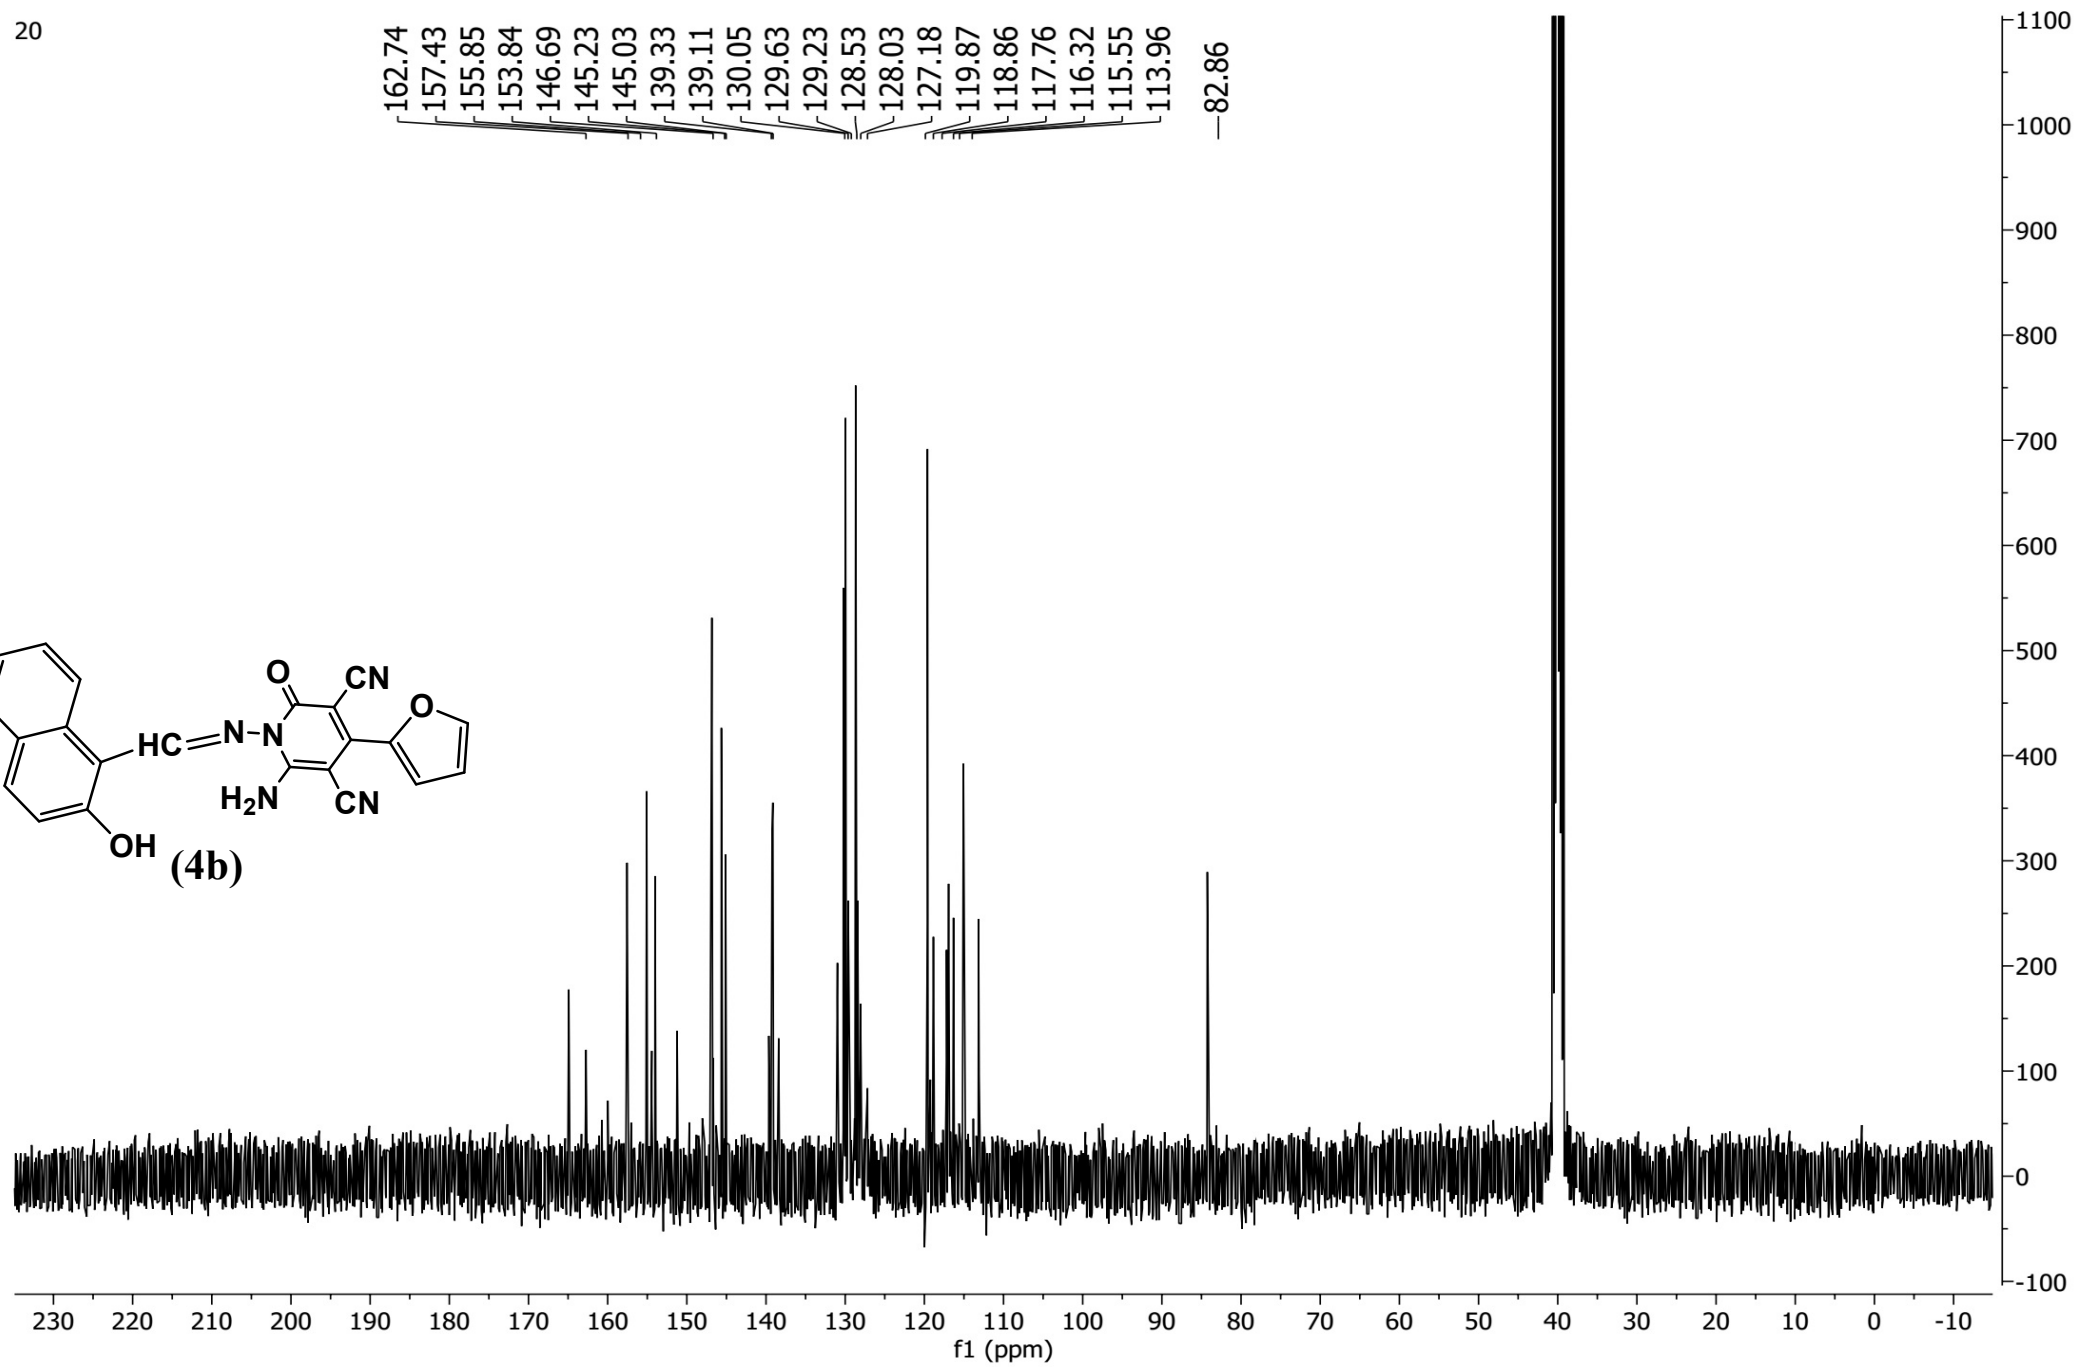

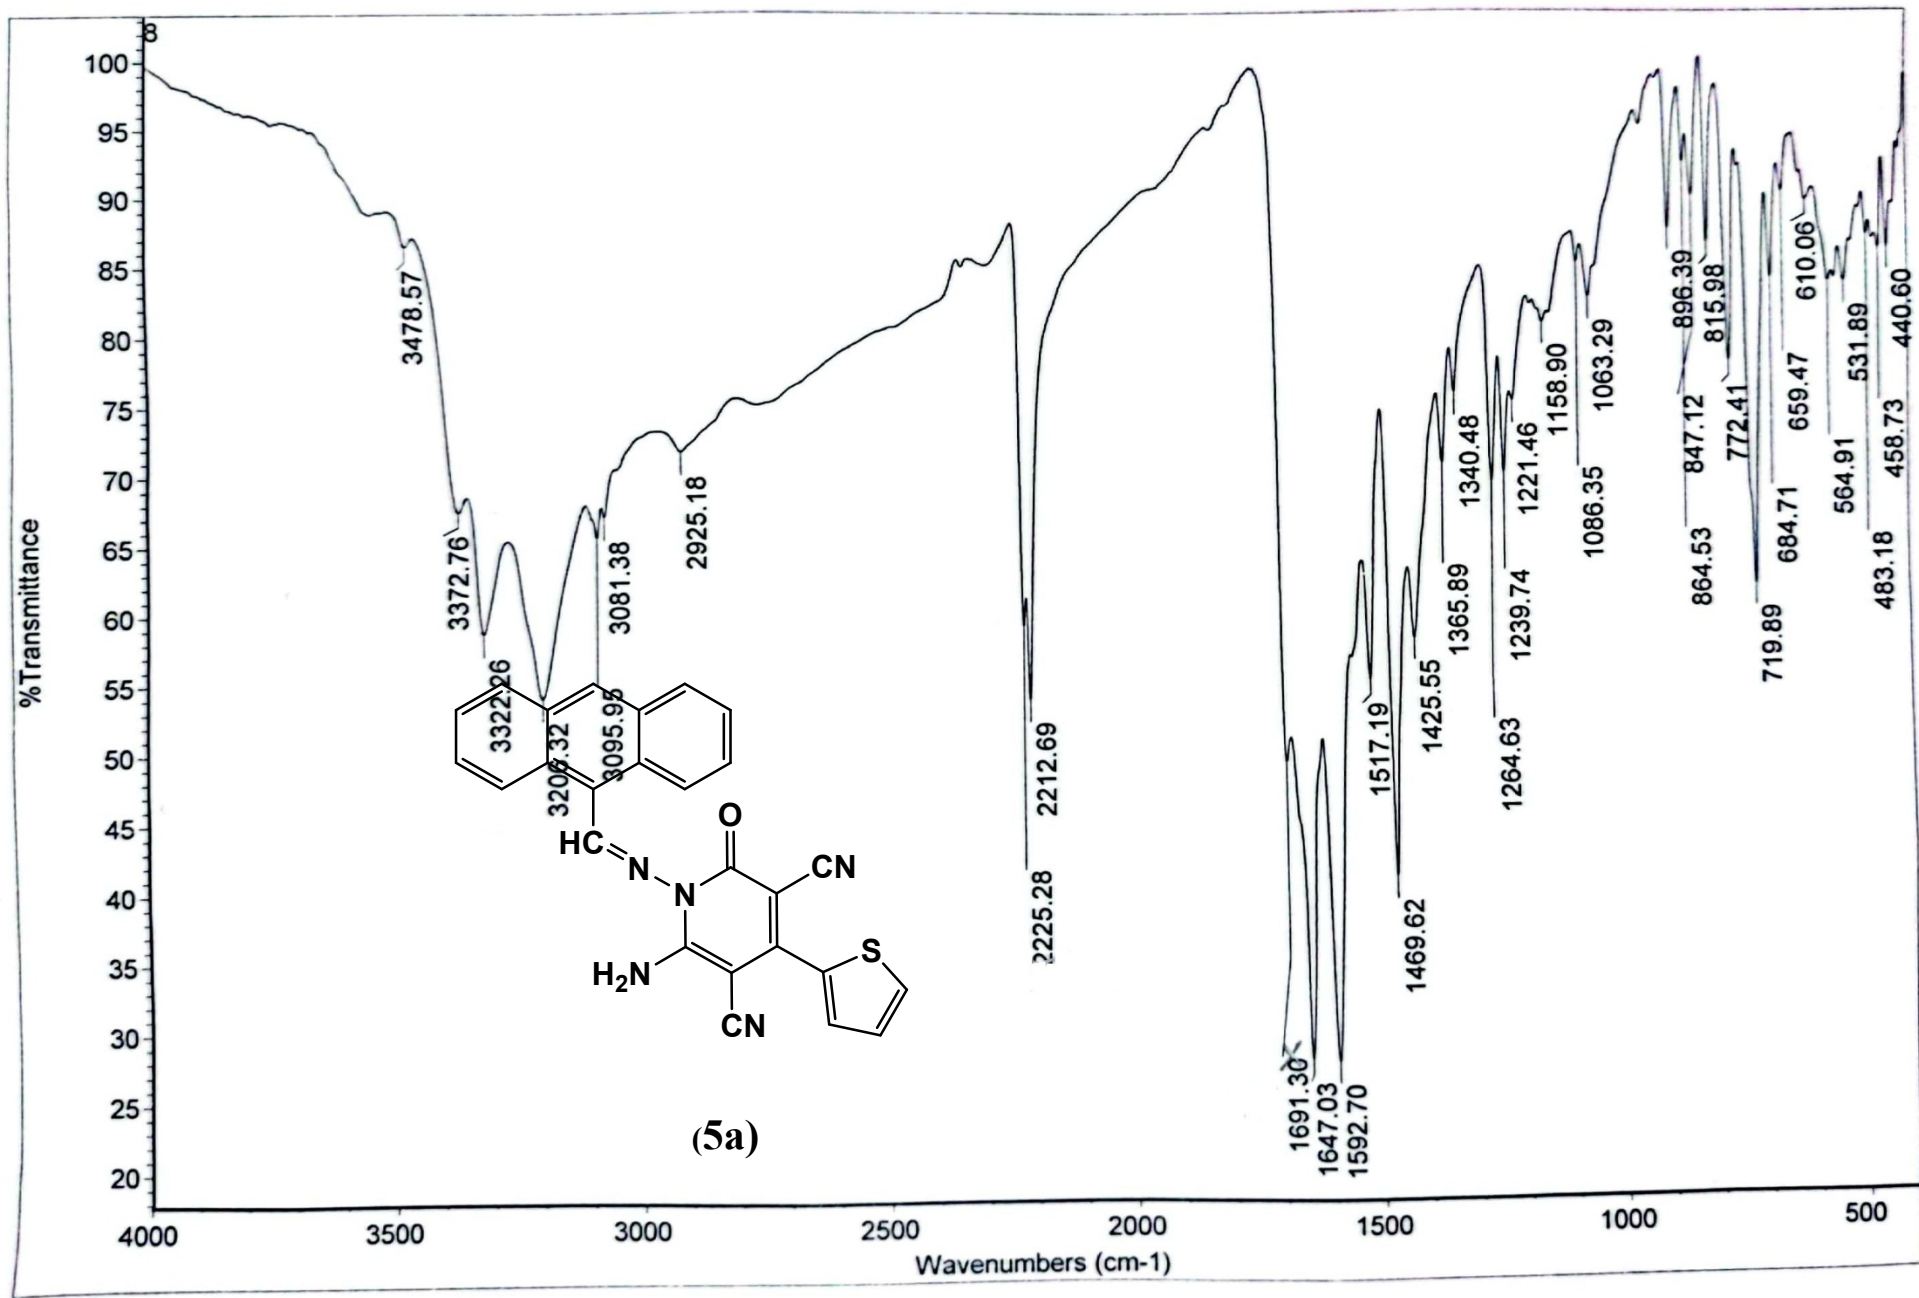

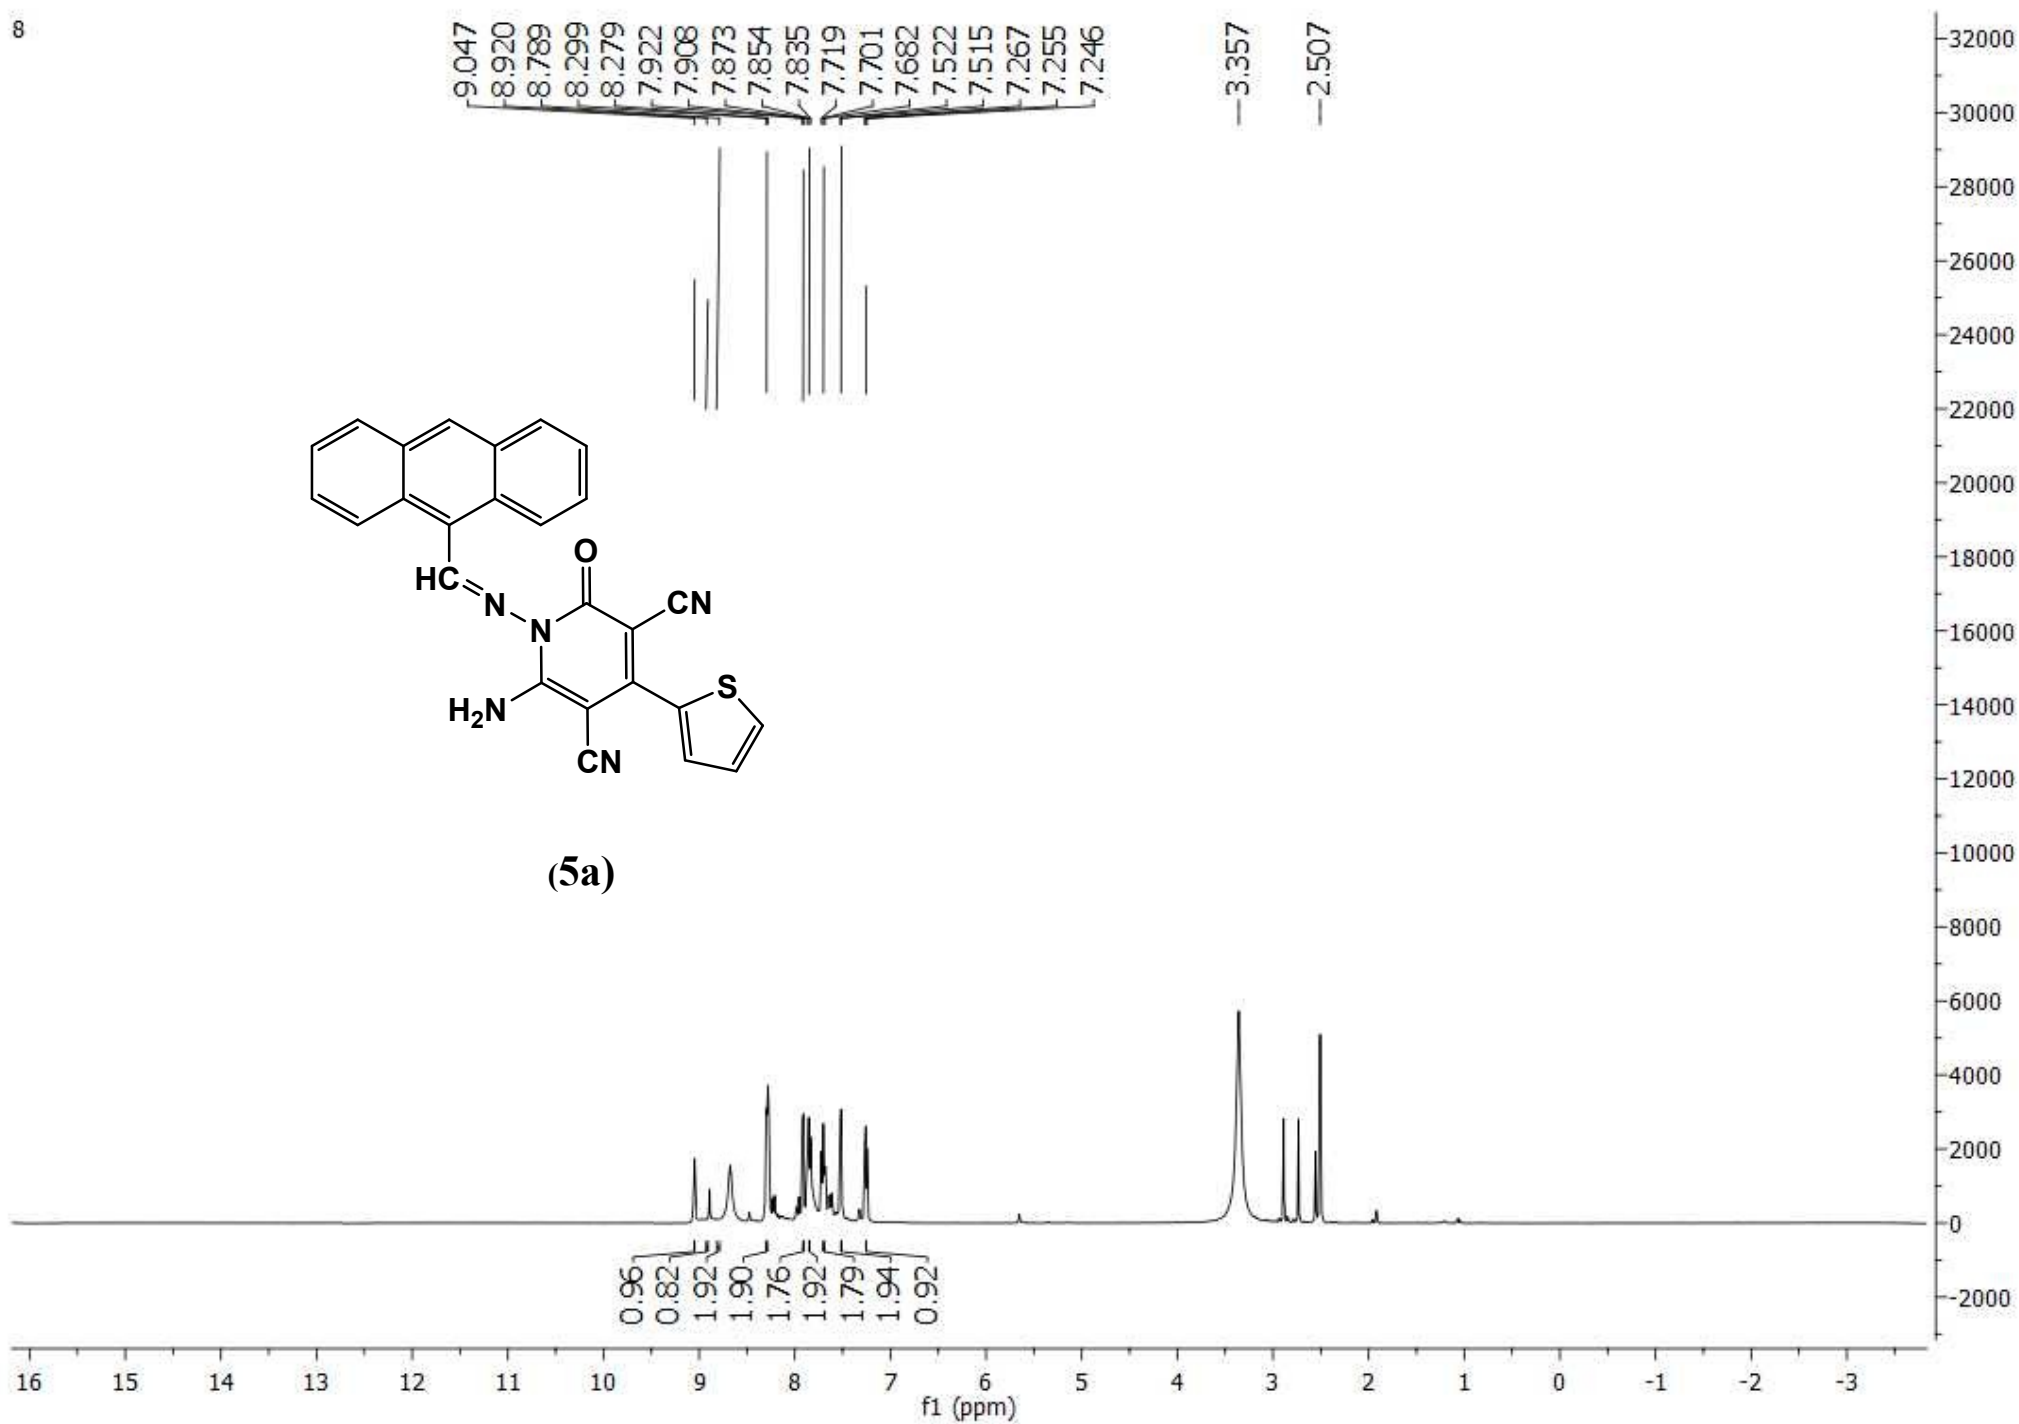

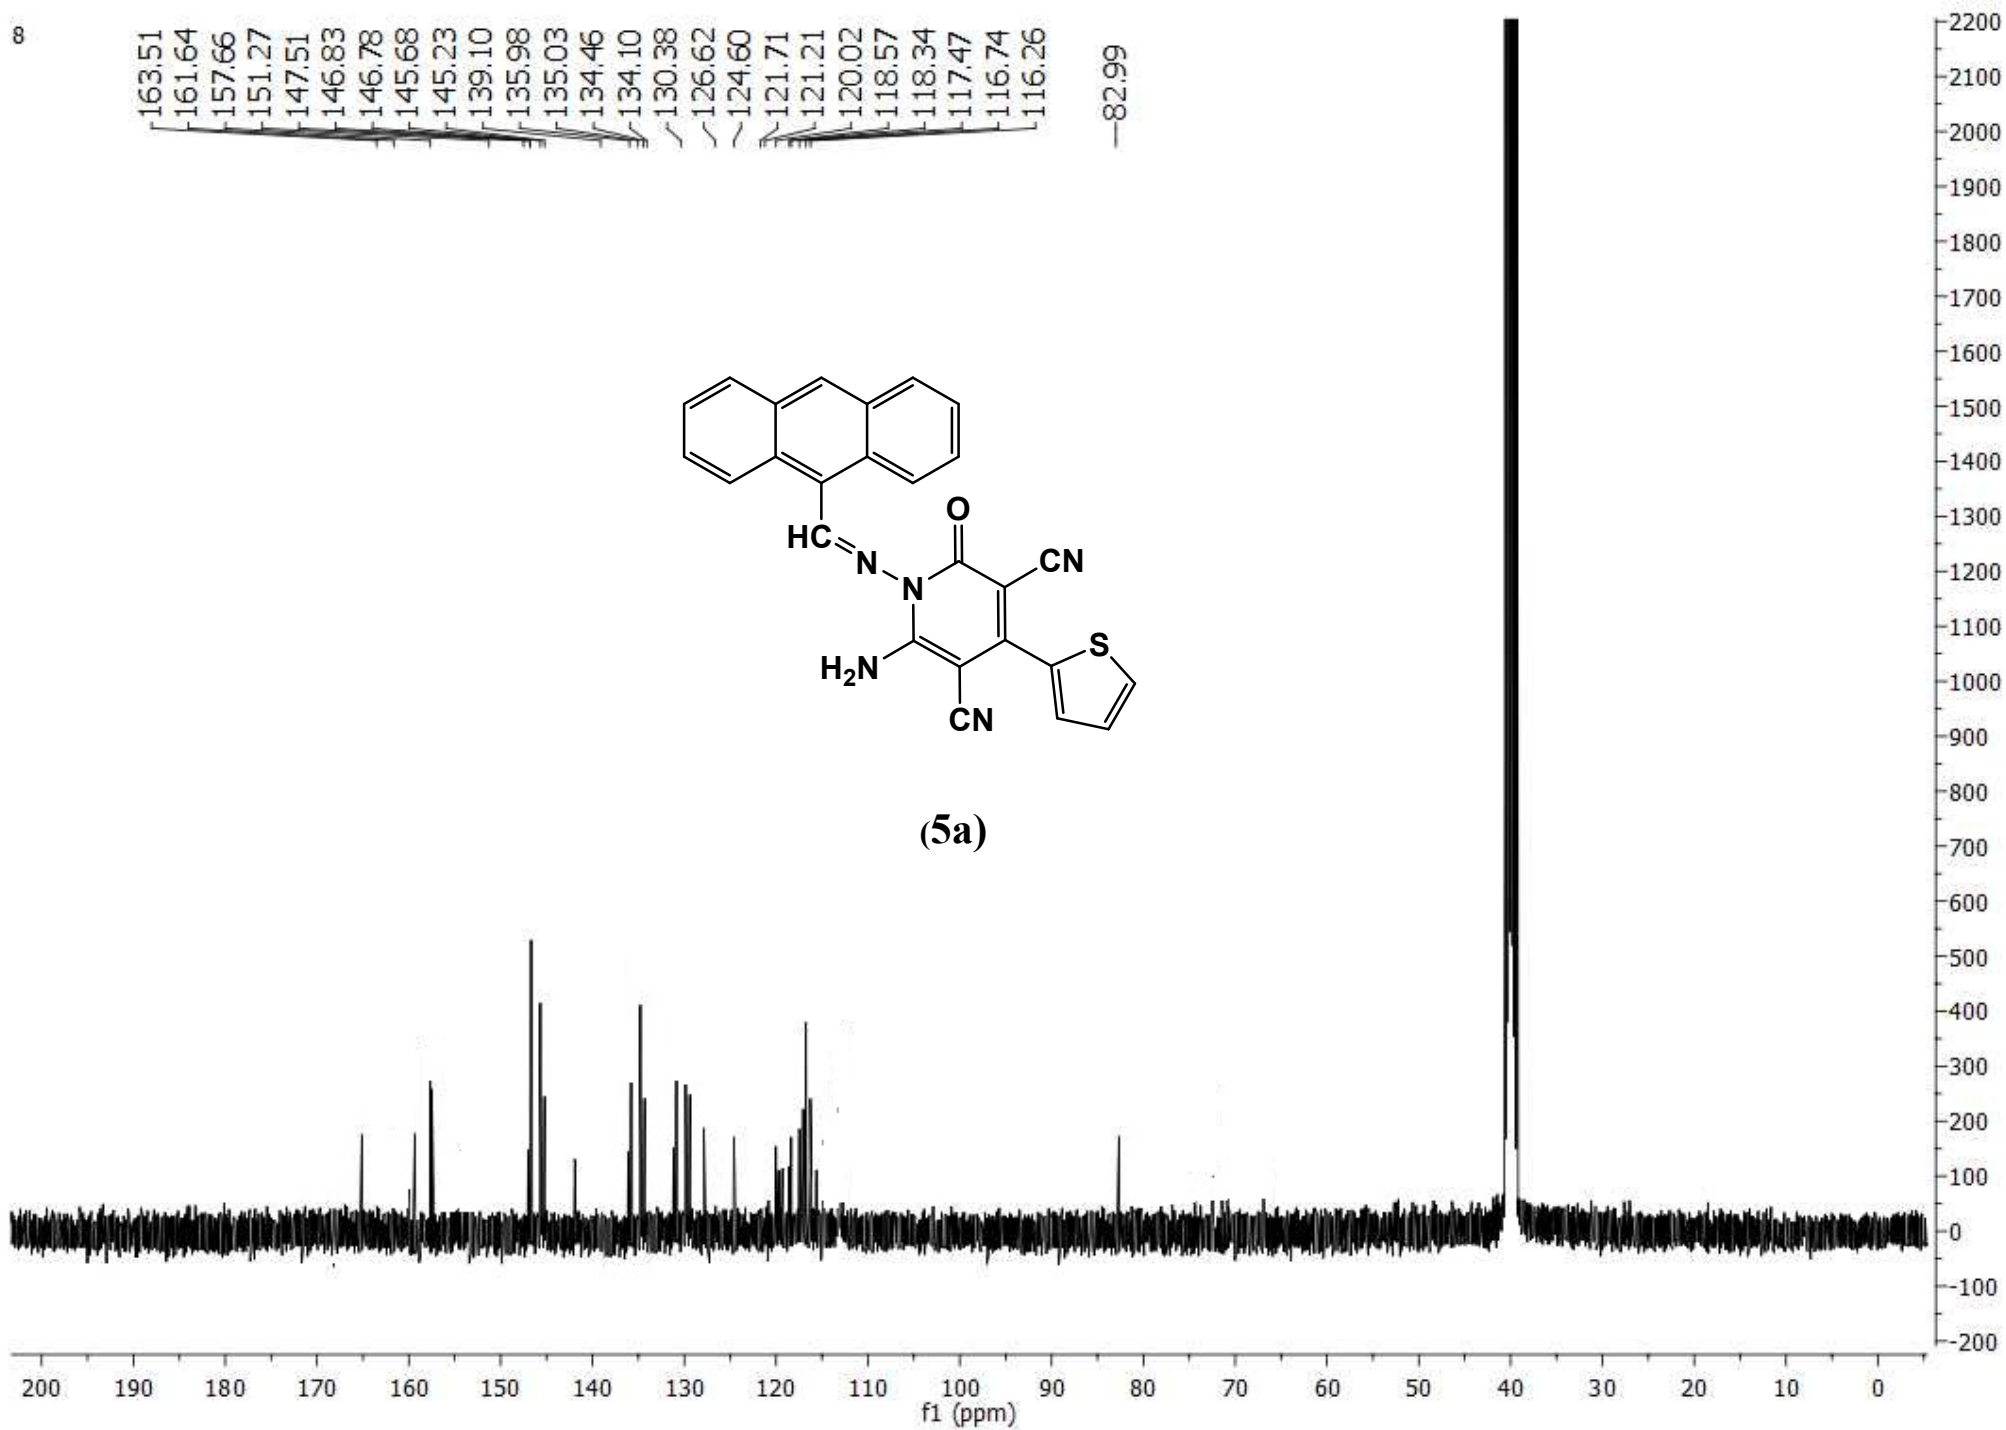



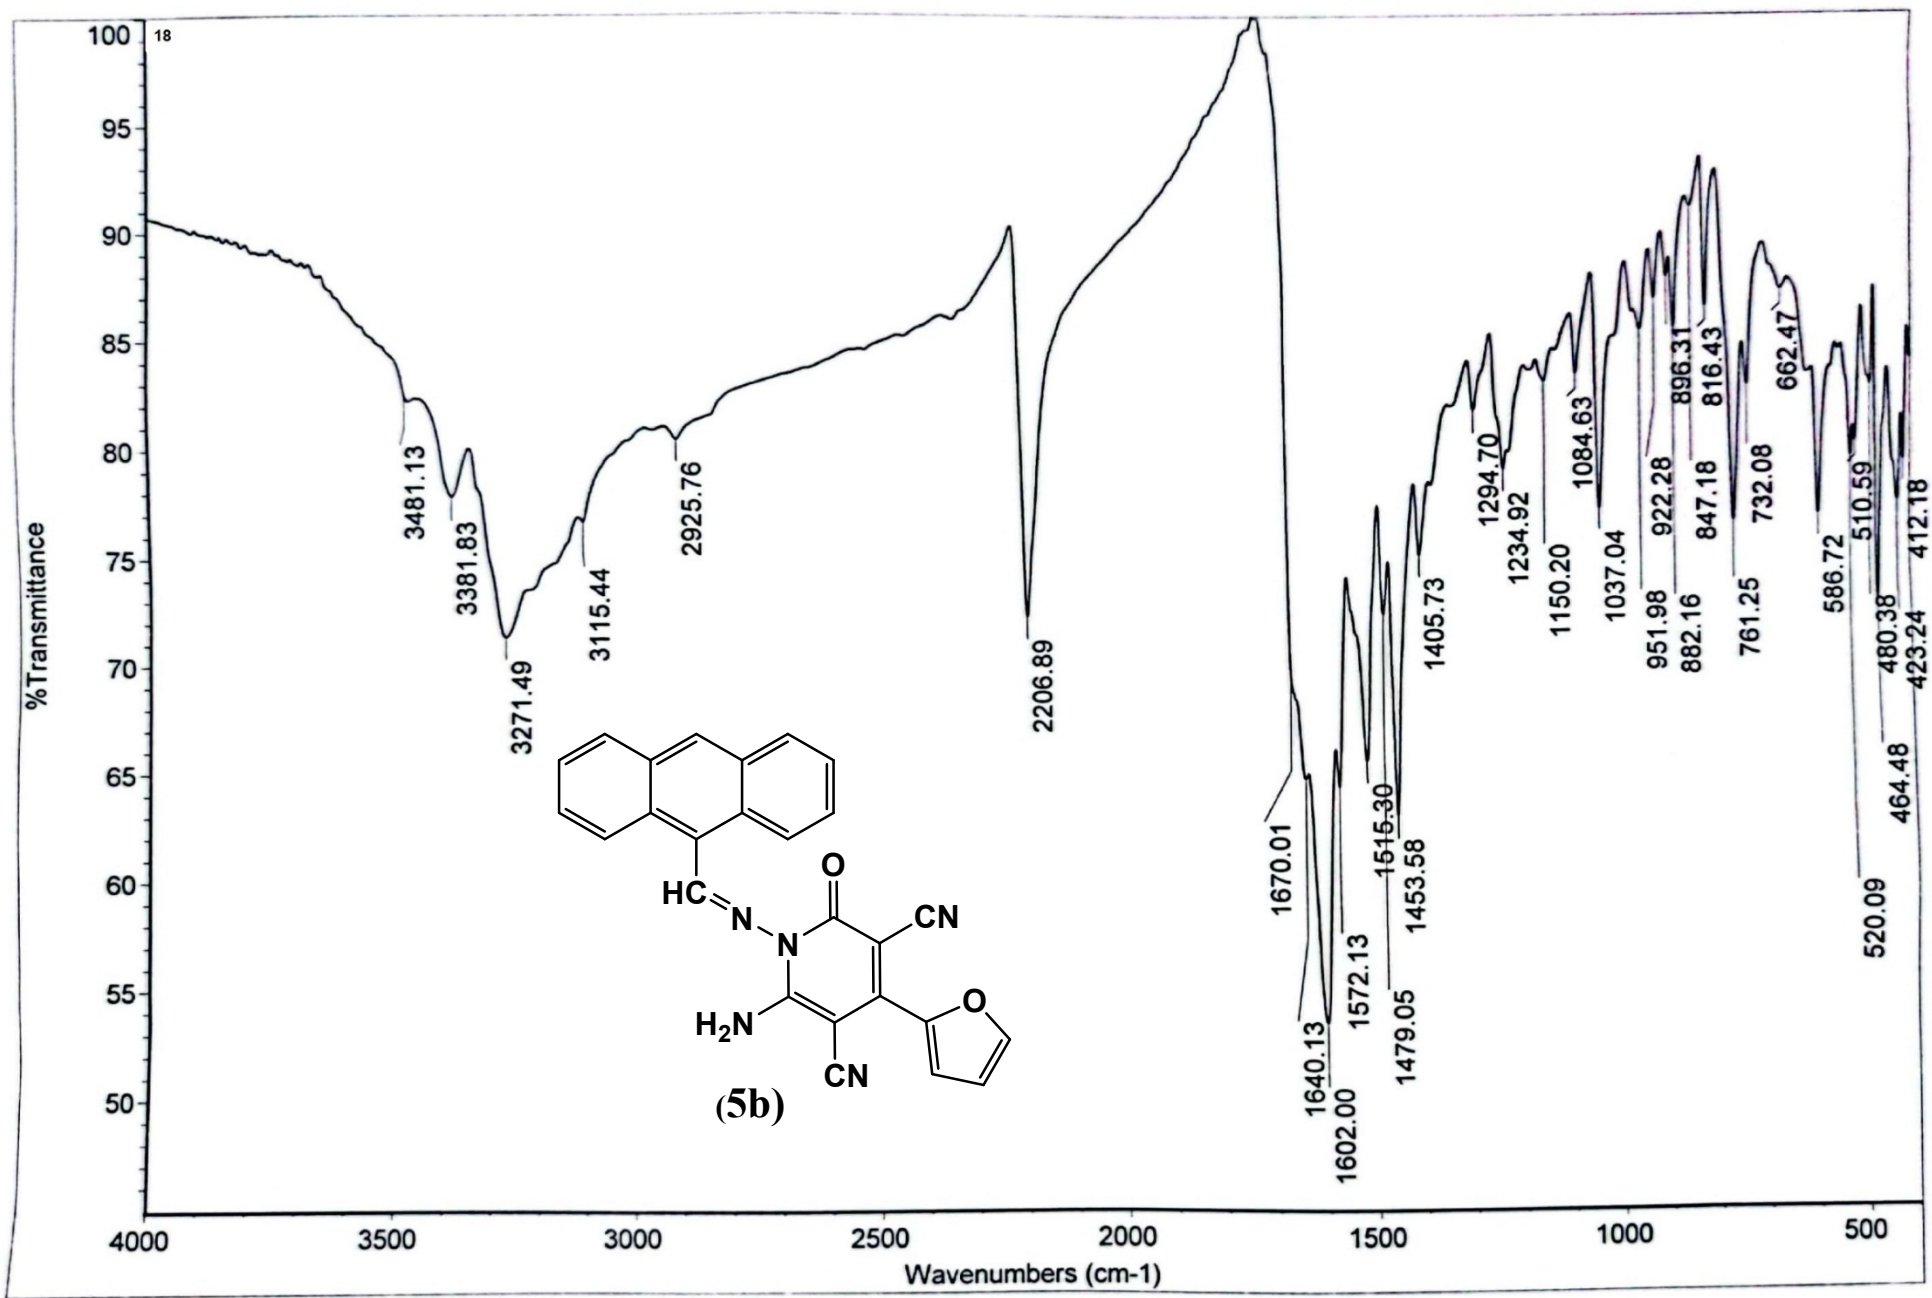

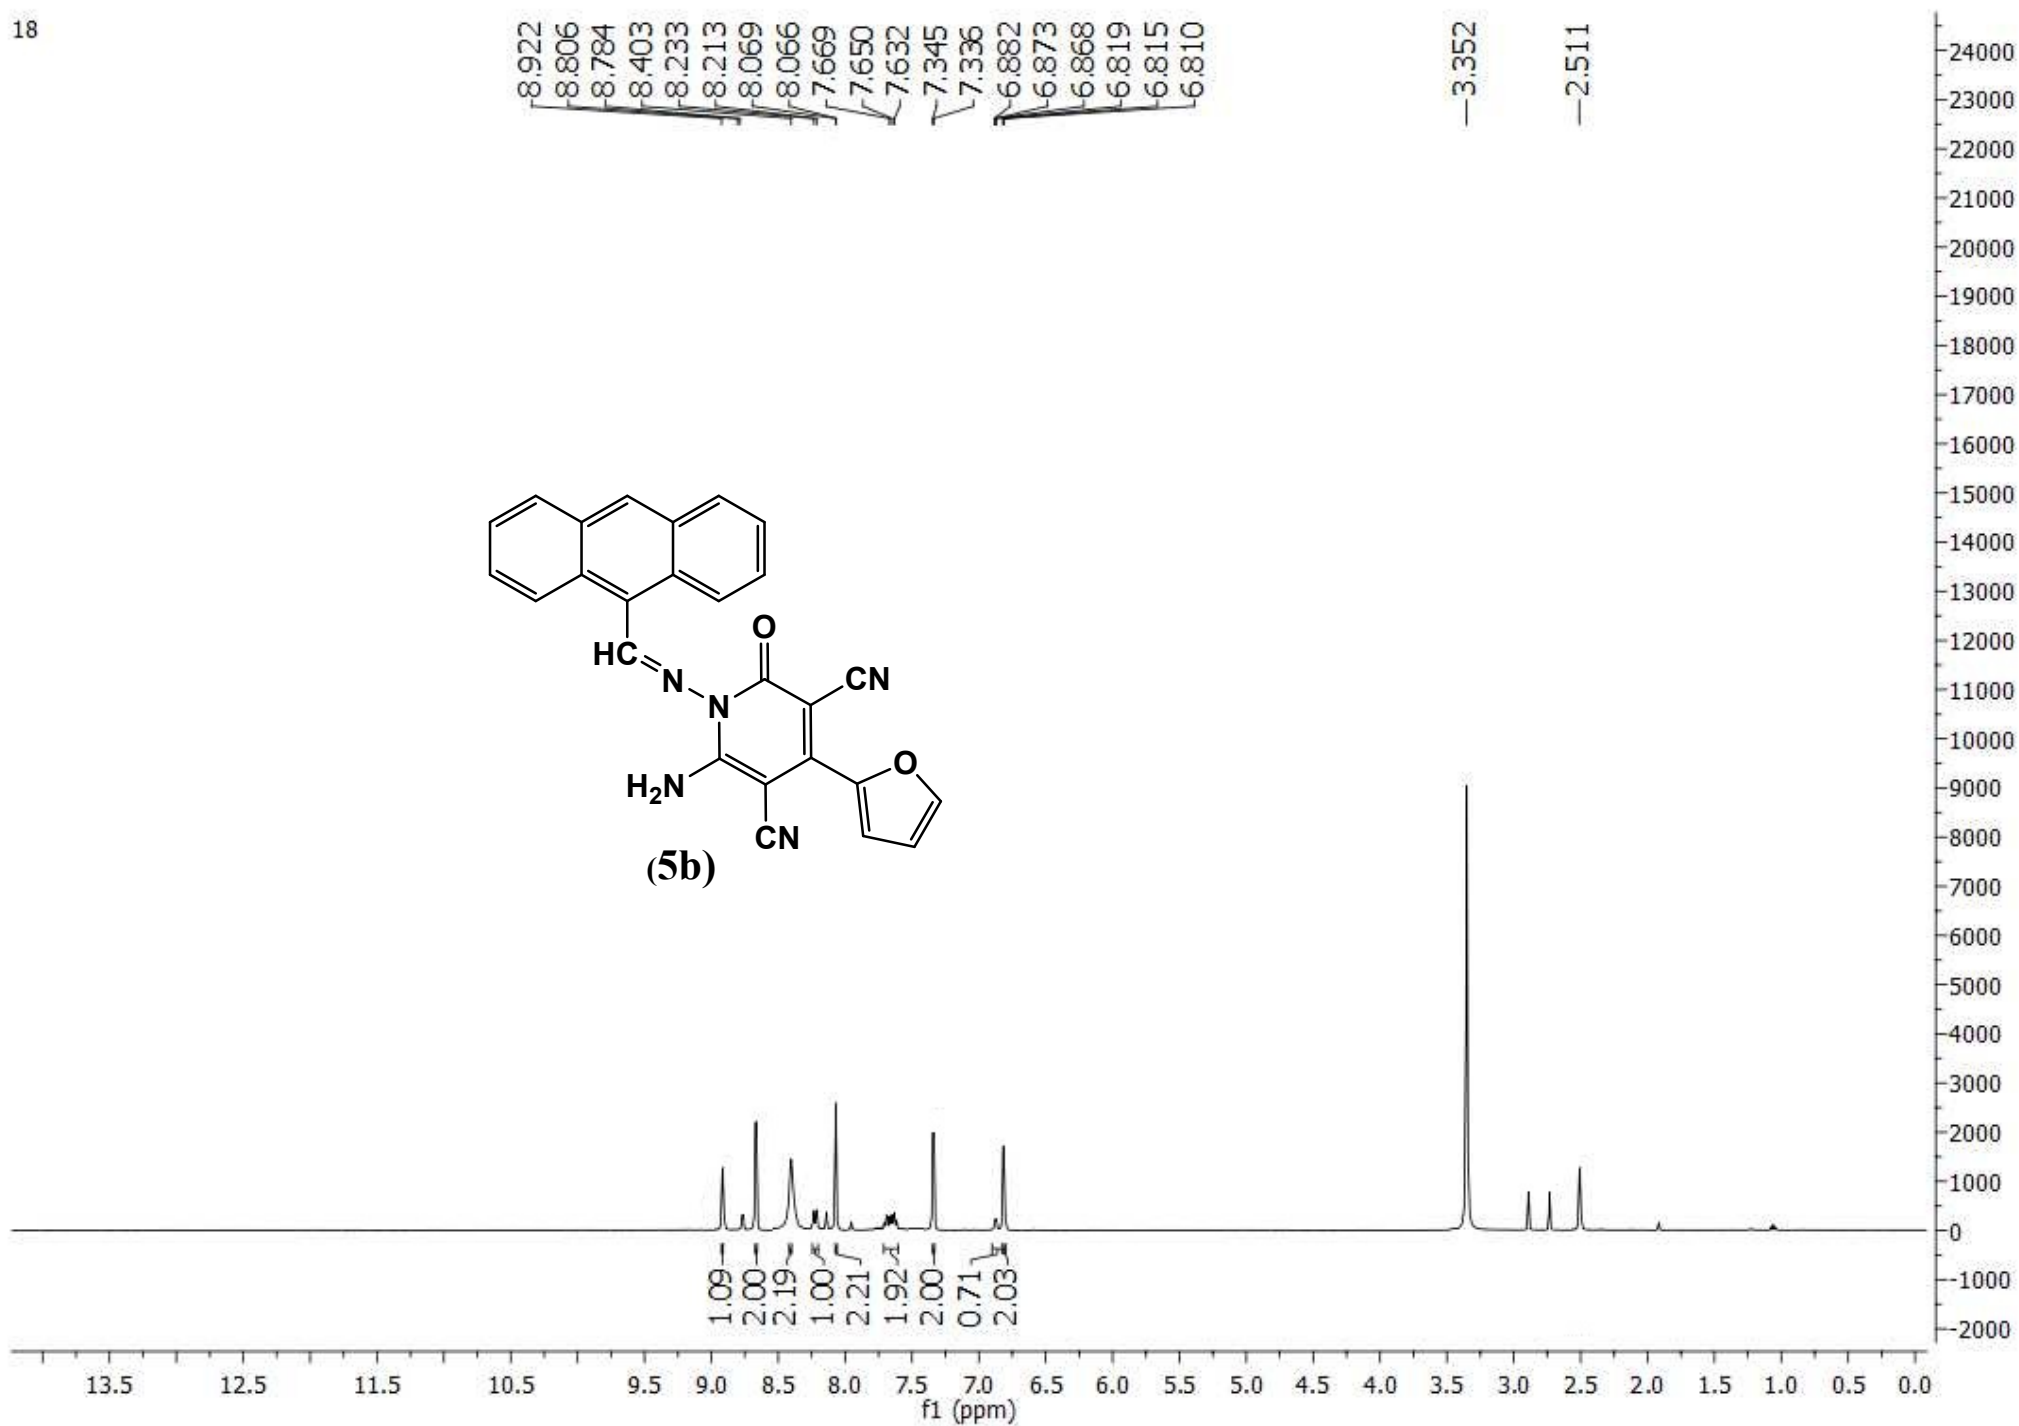

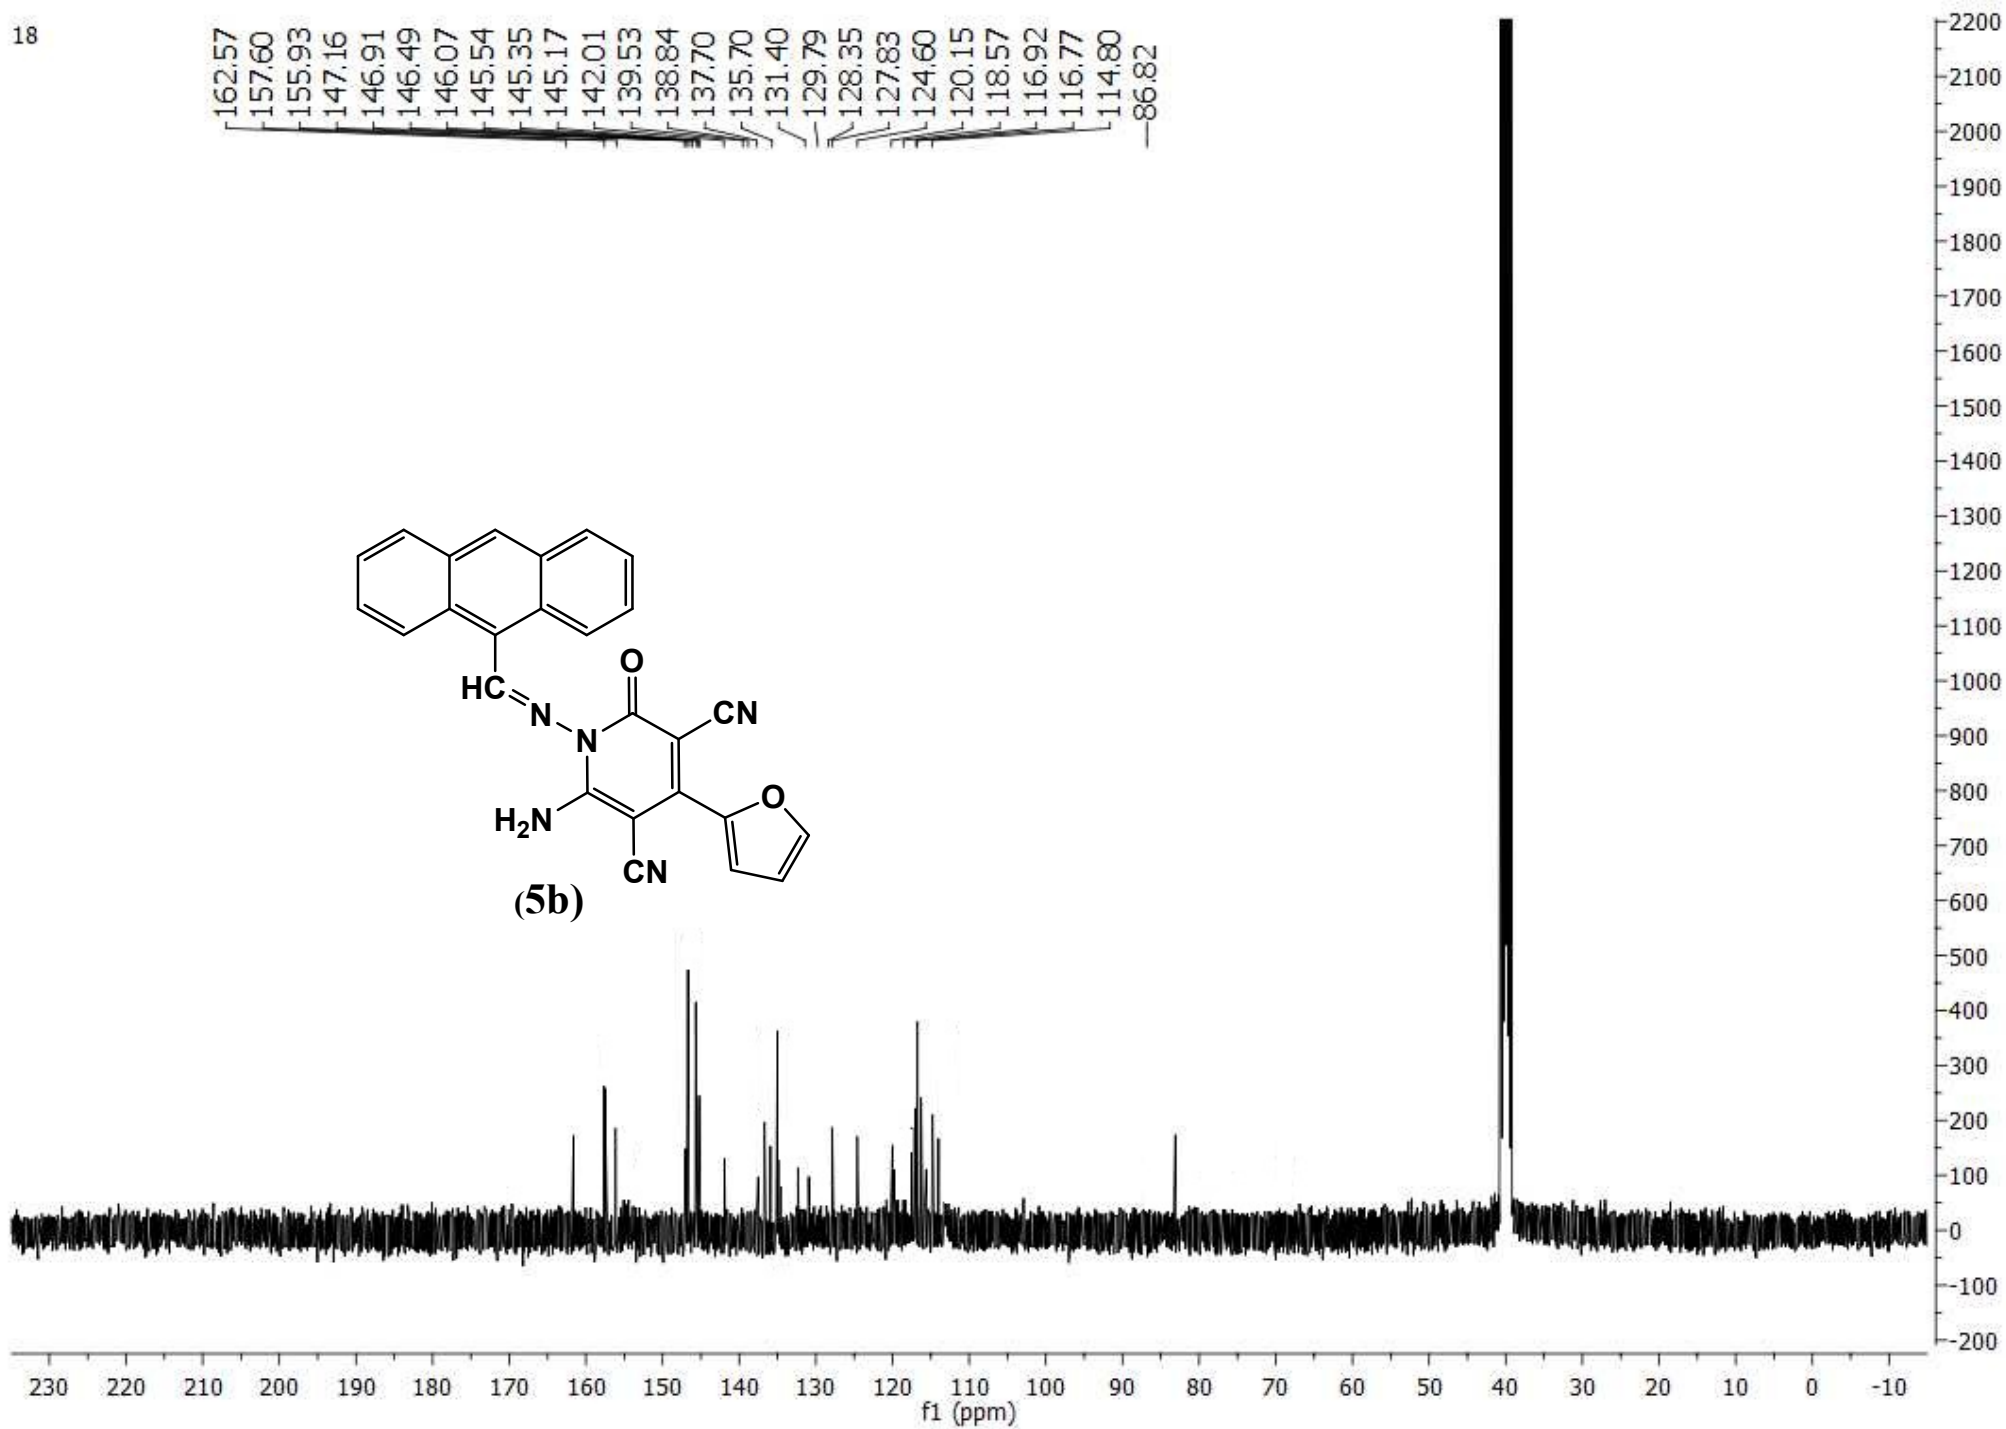

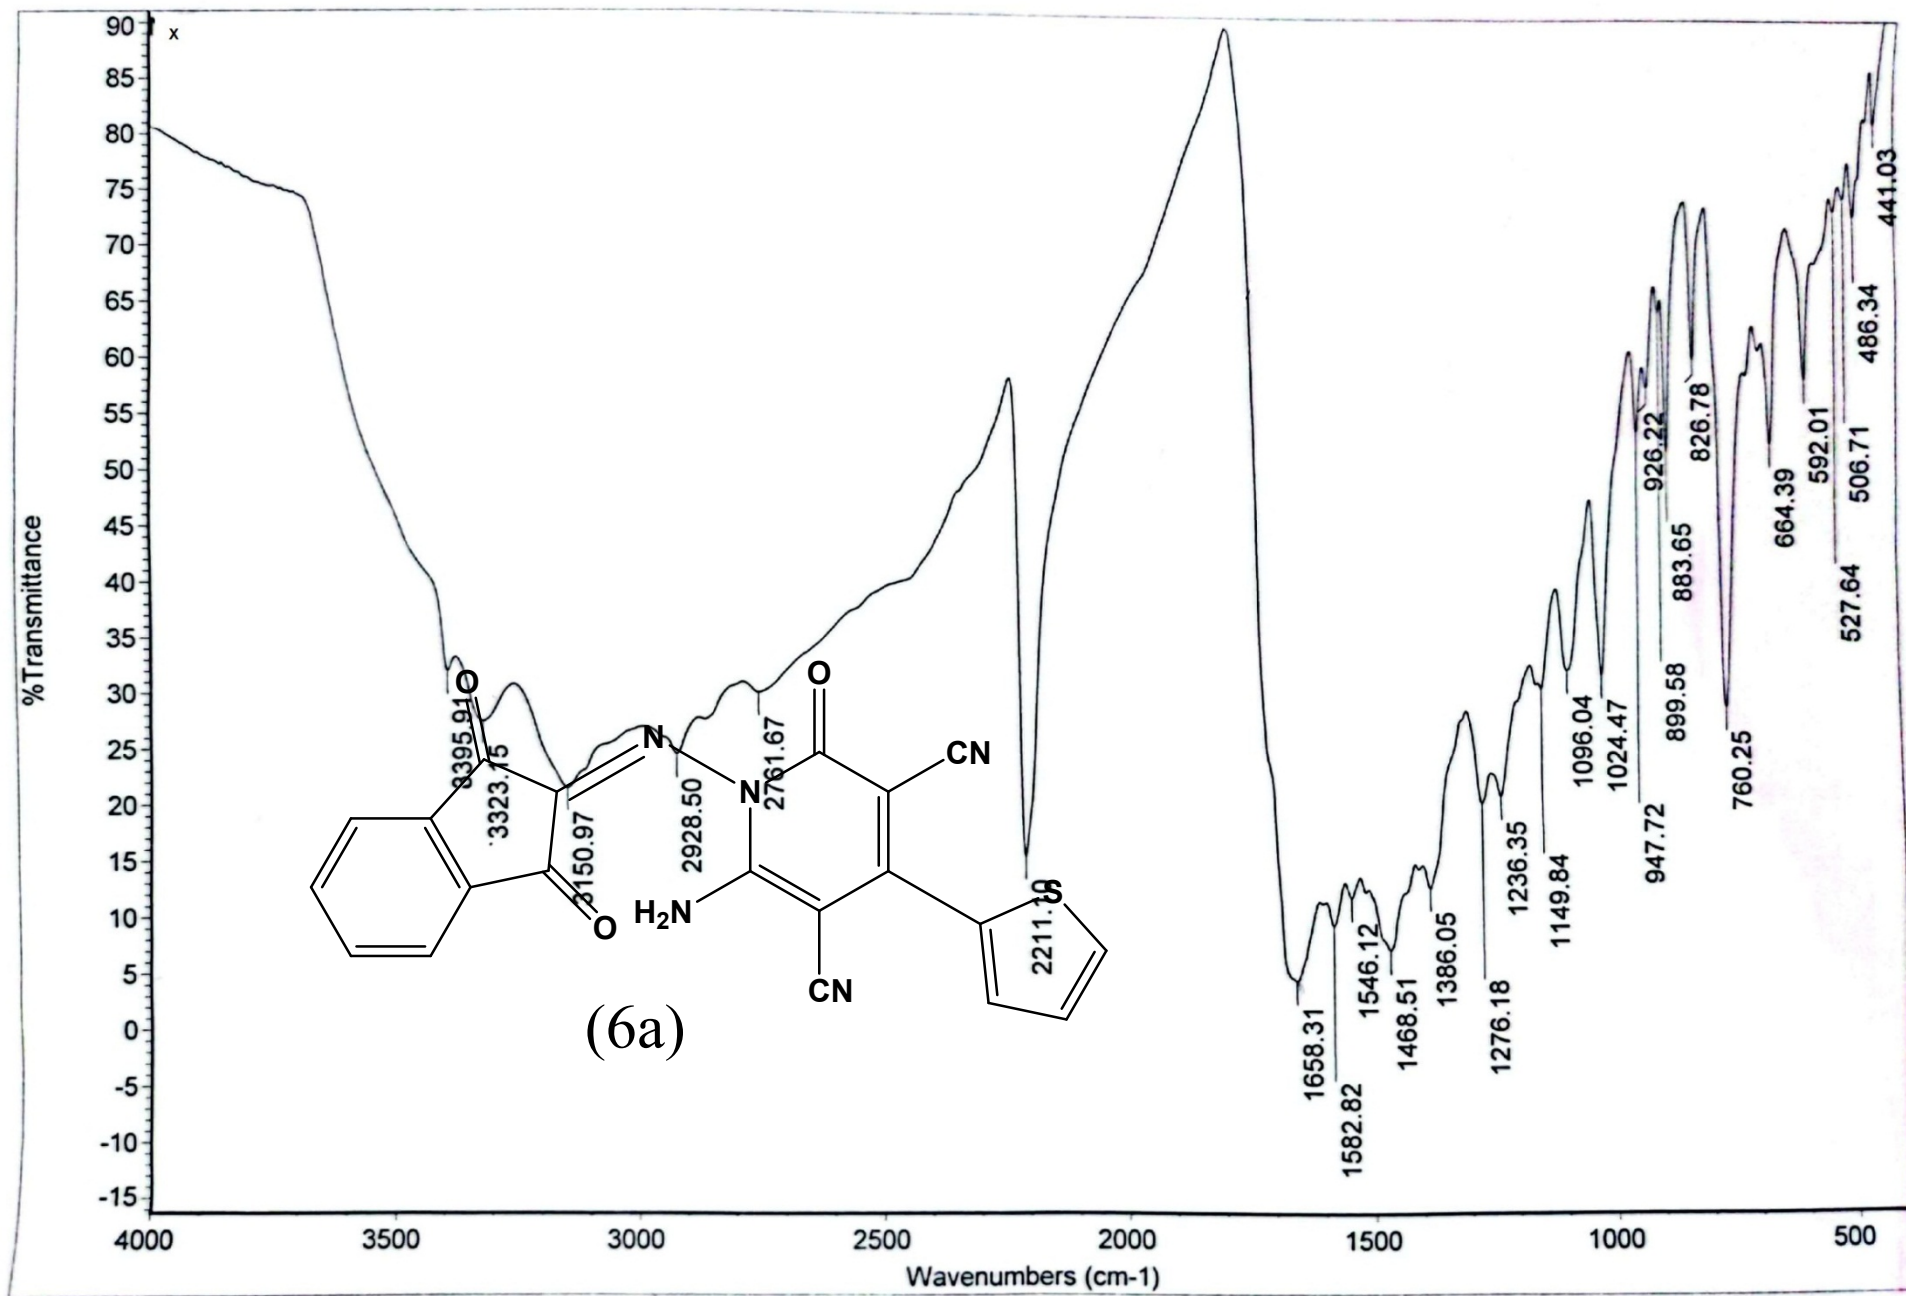

x

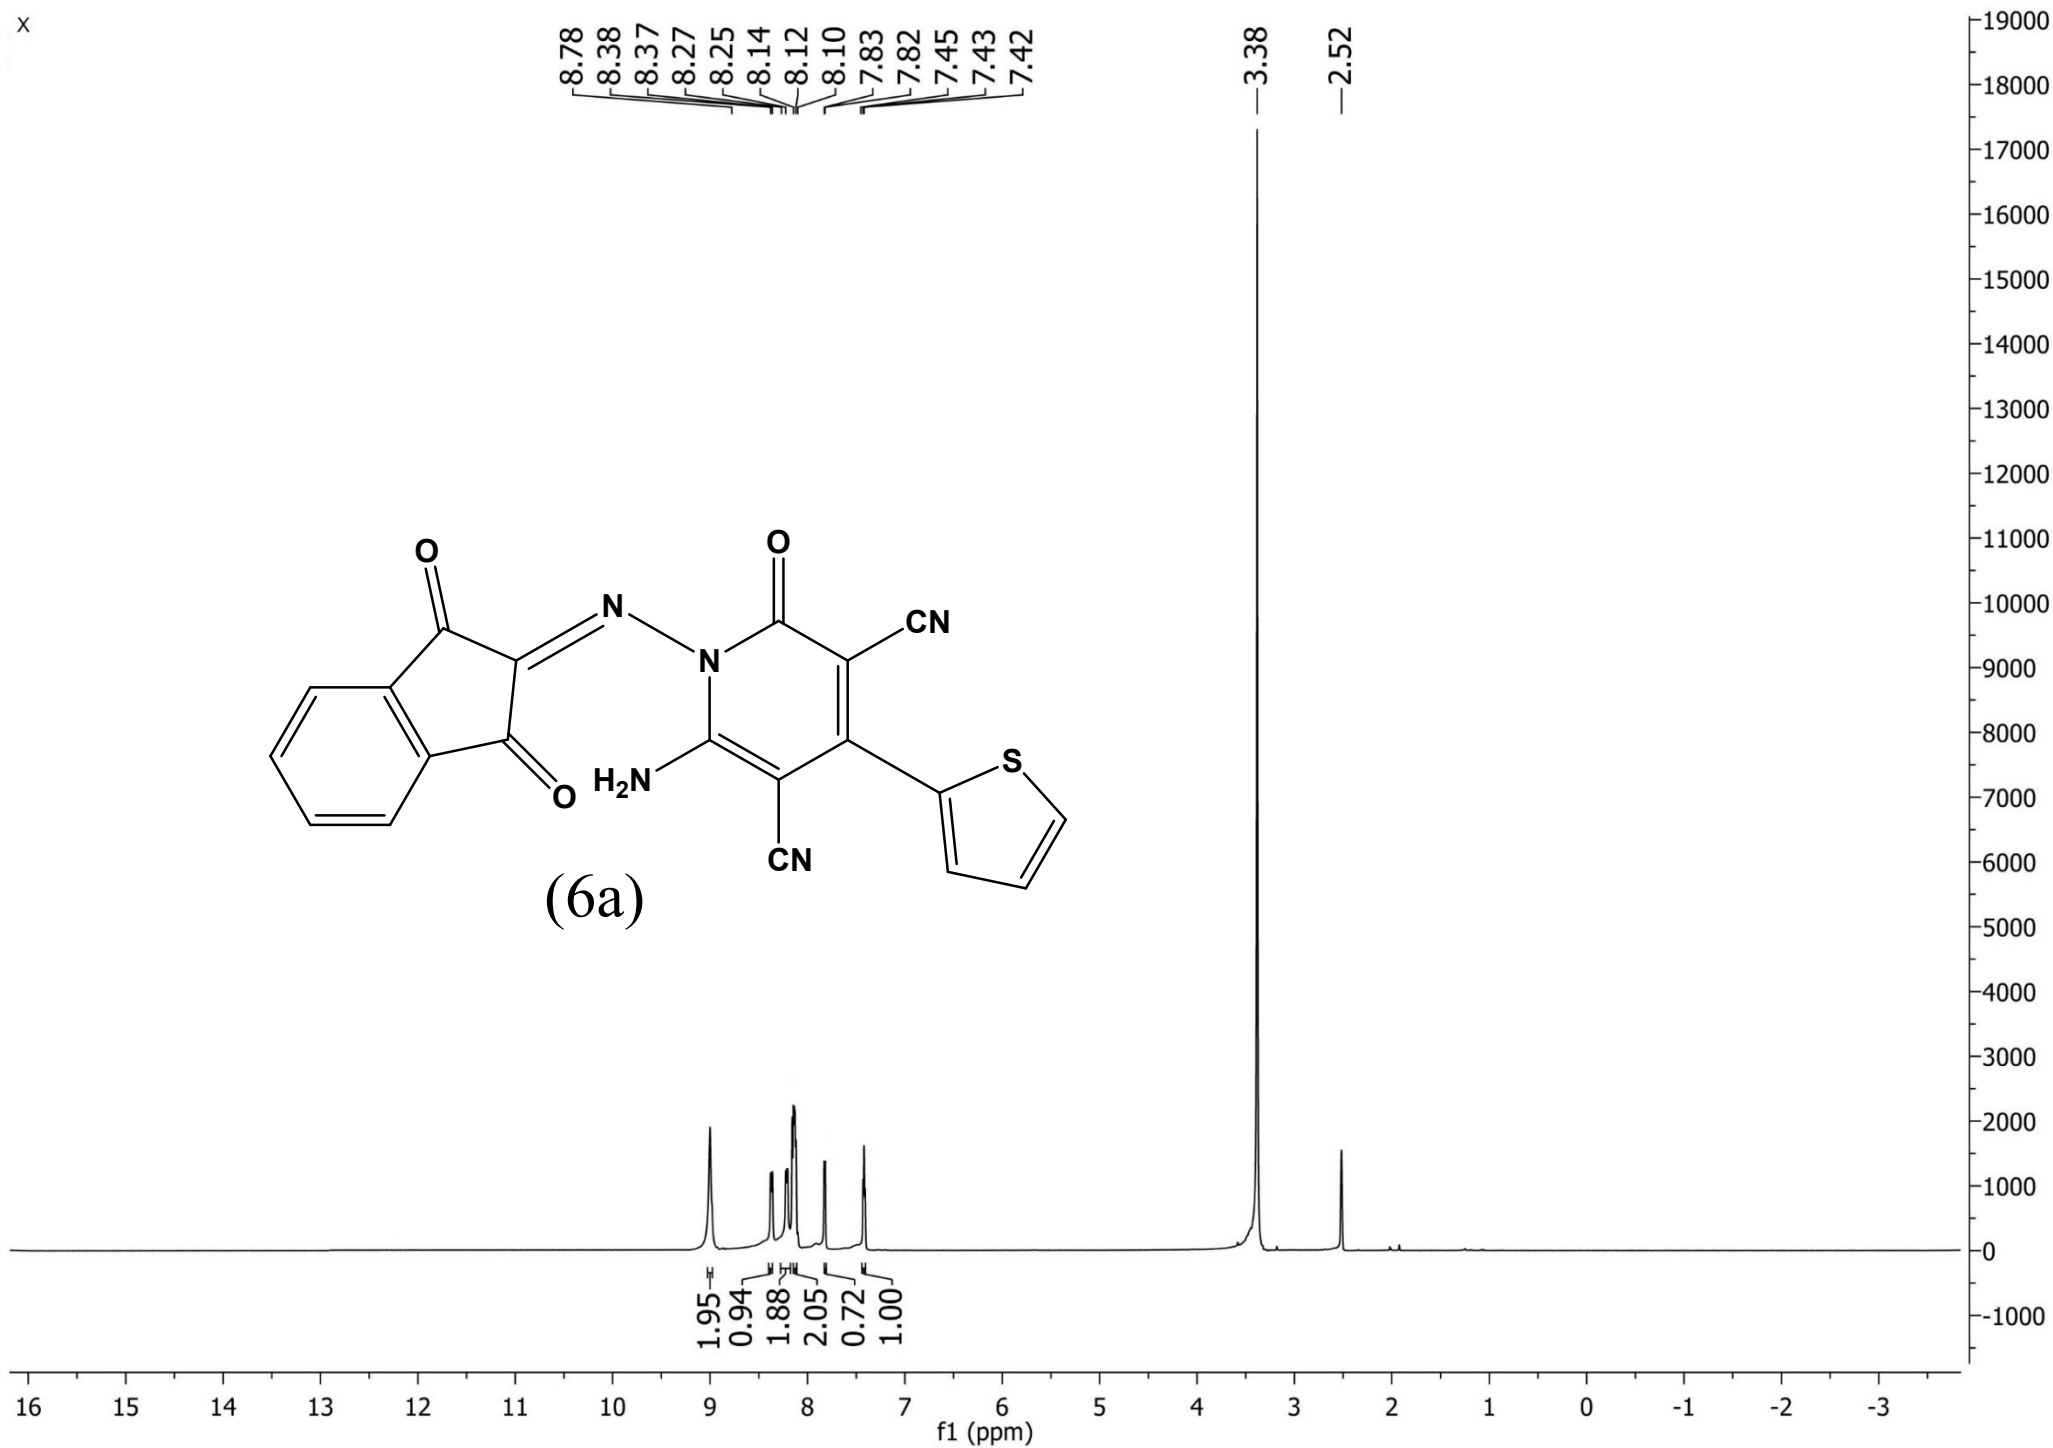

x

~168.51  
~164.51  
~162.17  
~158.91  
139.08  
138.71  
138.20  
134.95  
128.62  
127.86  
127.21  
124.41  
122.58  
122.28  
119.36  
118.95  
116.71  
113.90  
113.36

—79.40

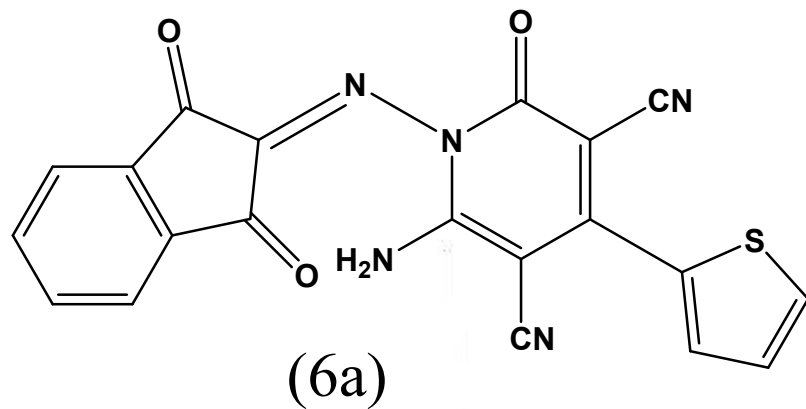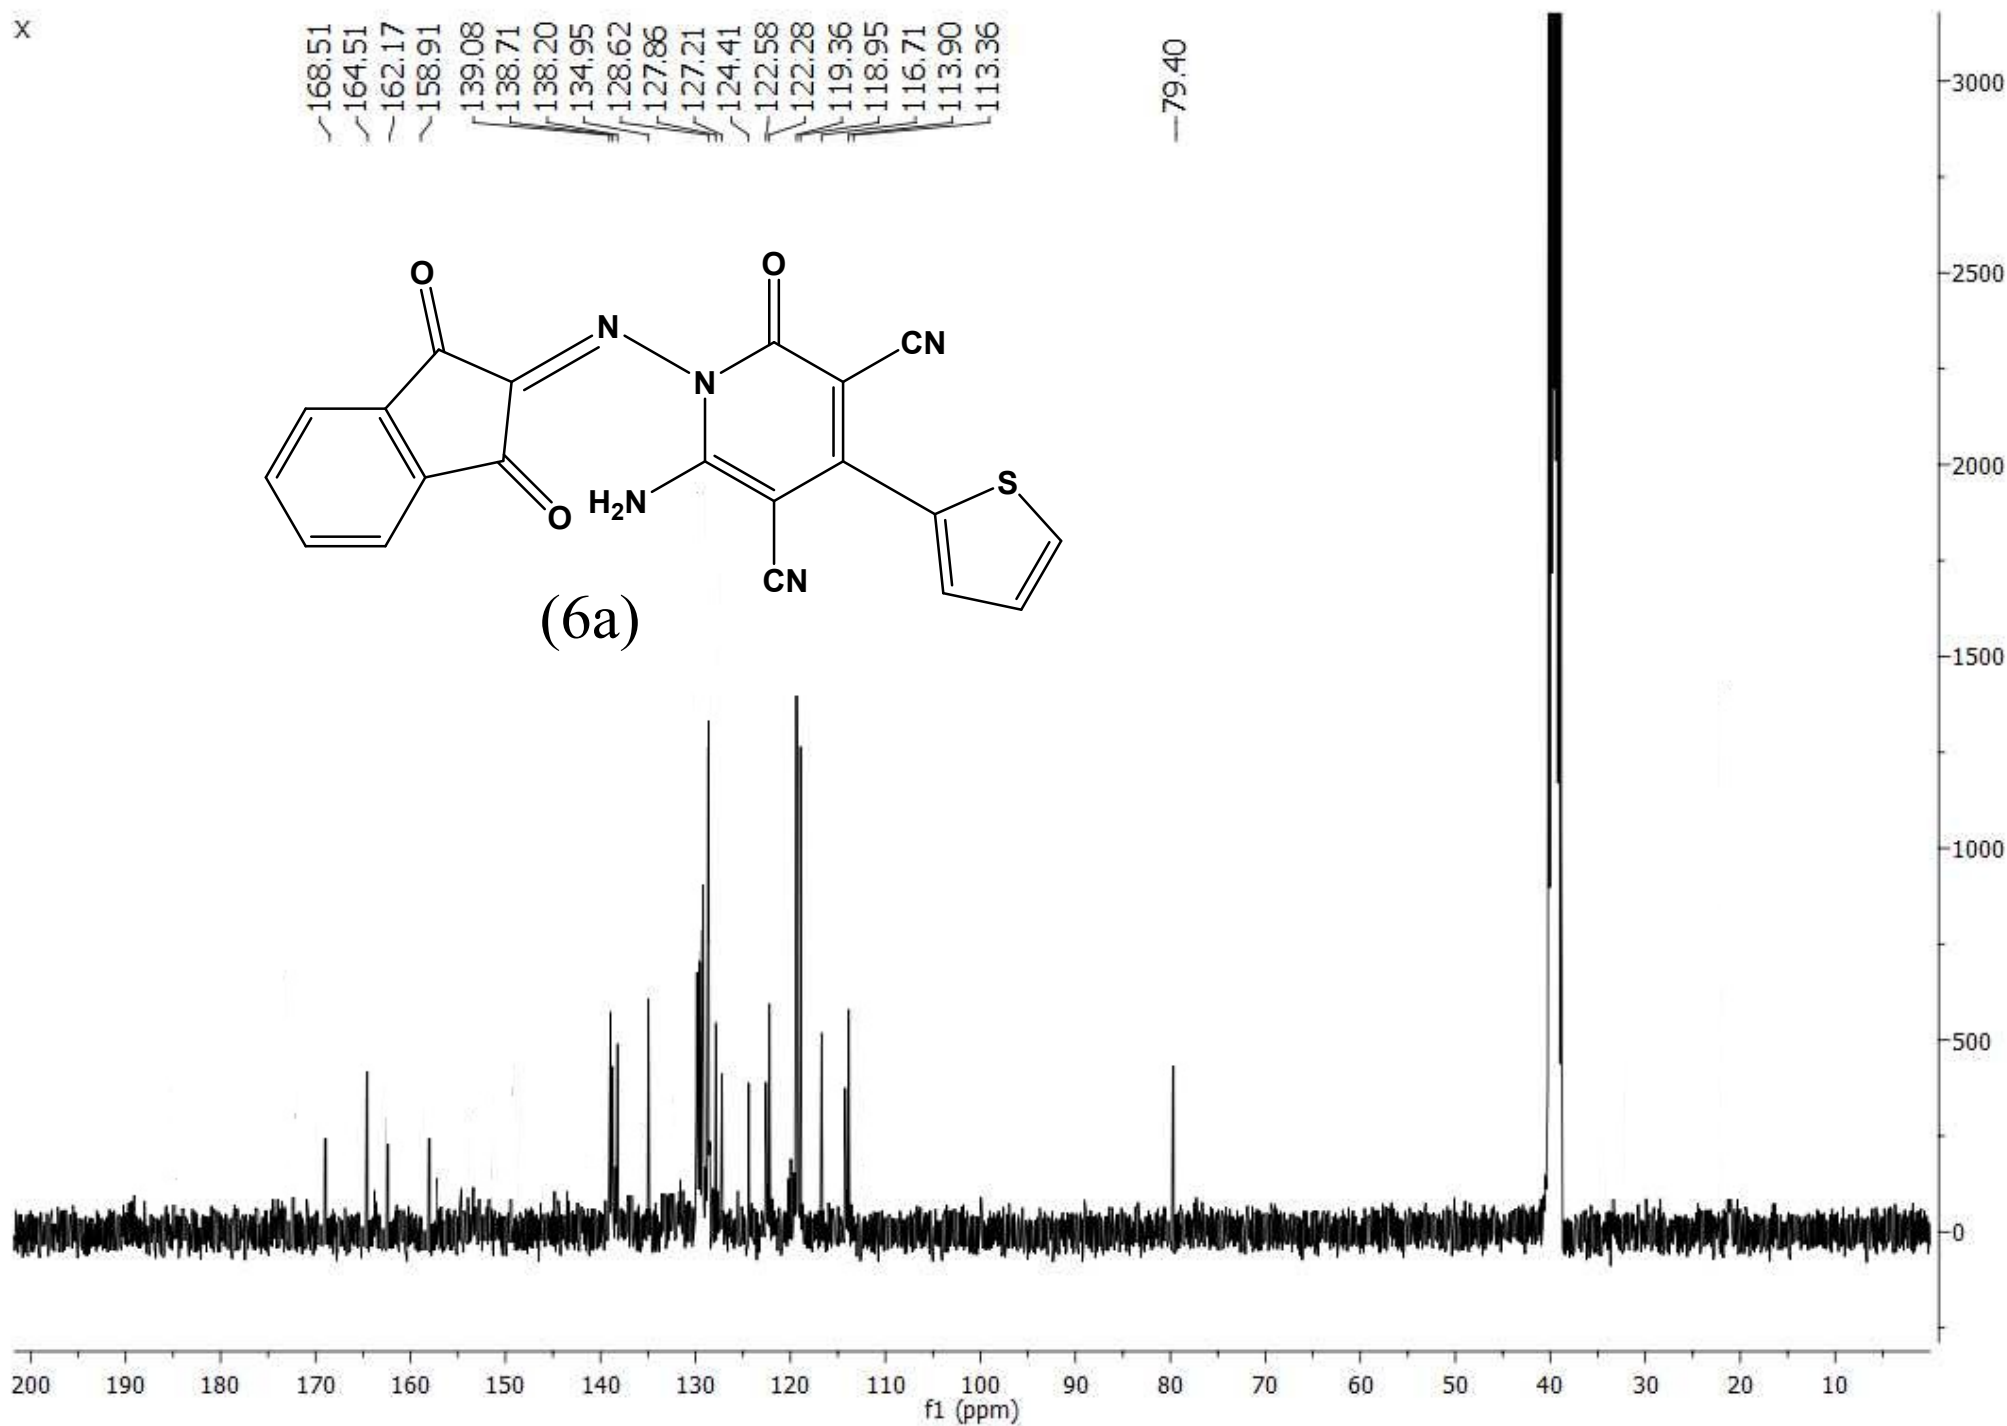

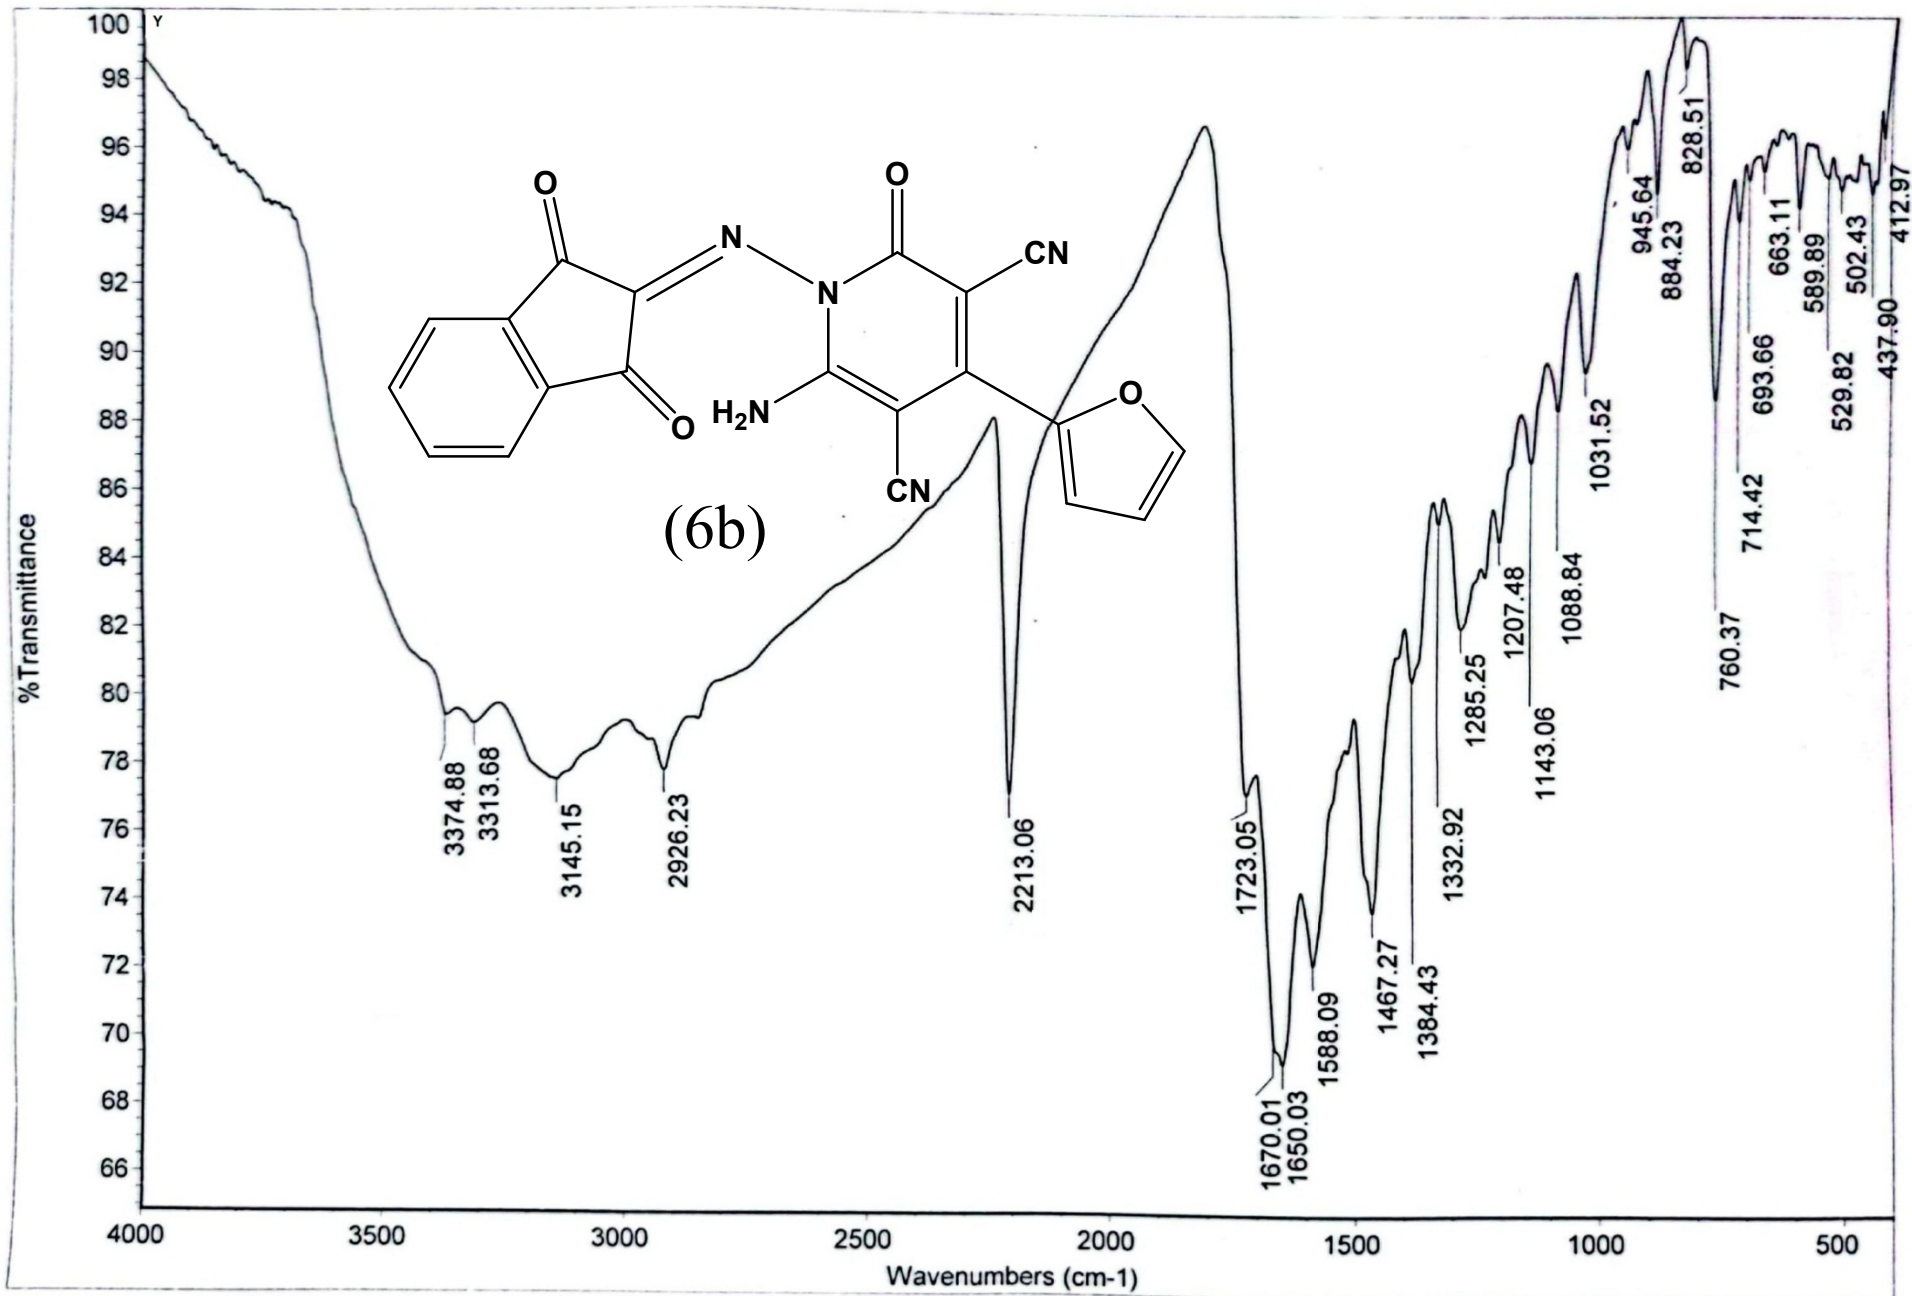

Y

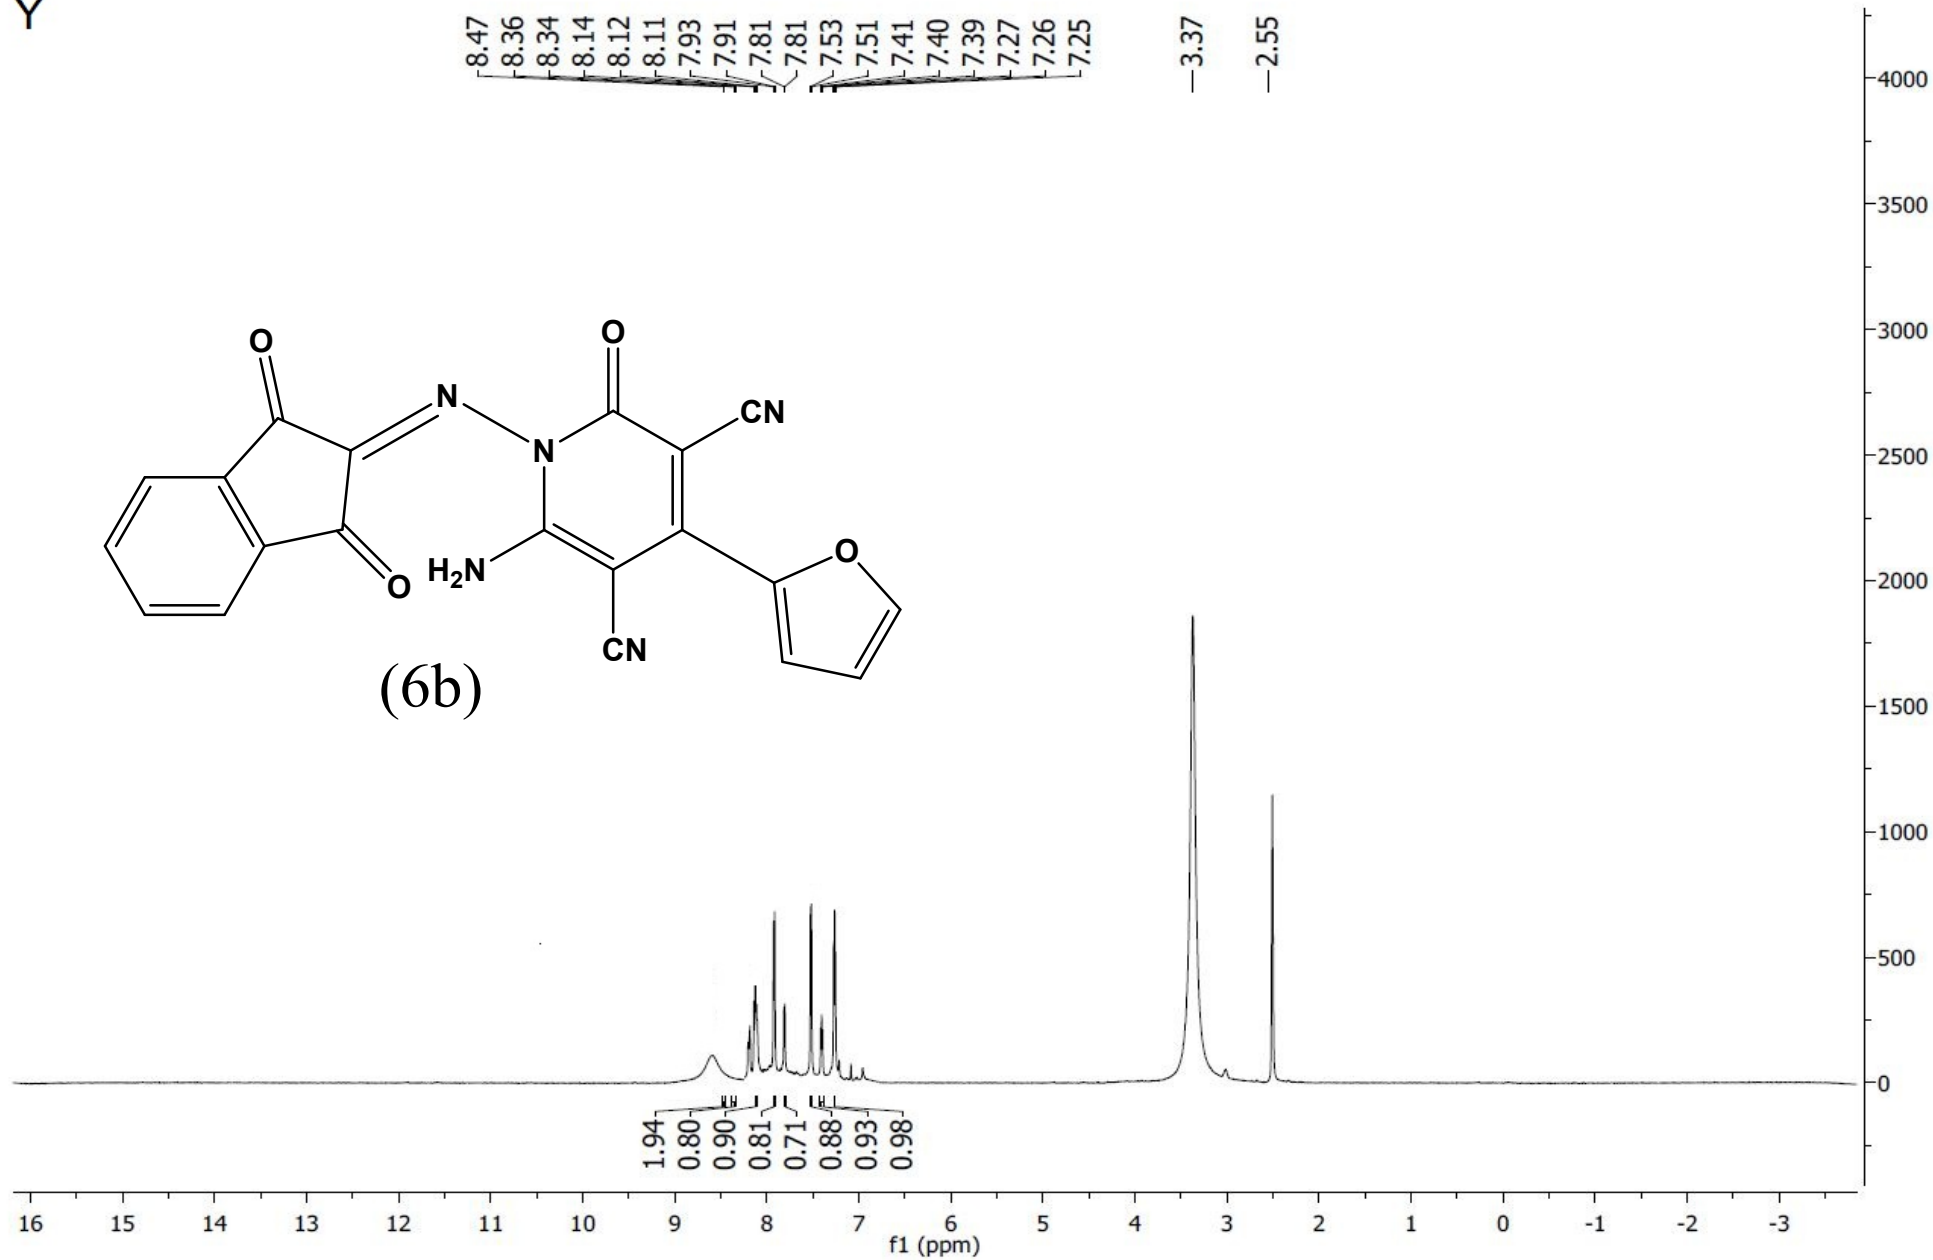



Y

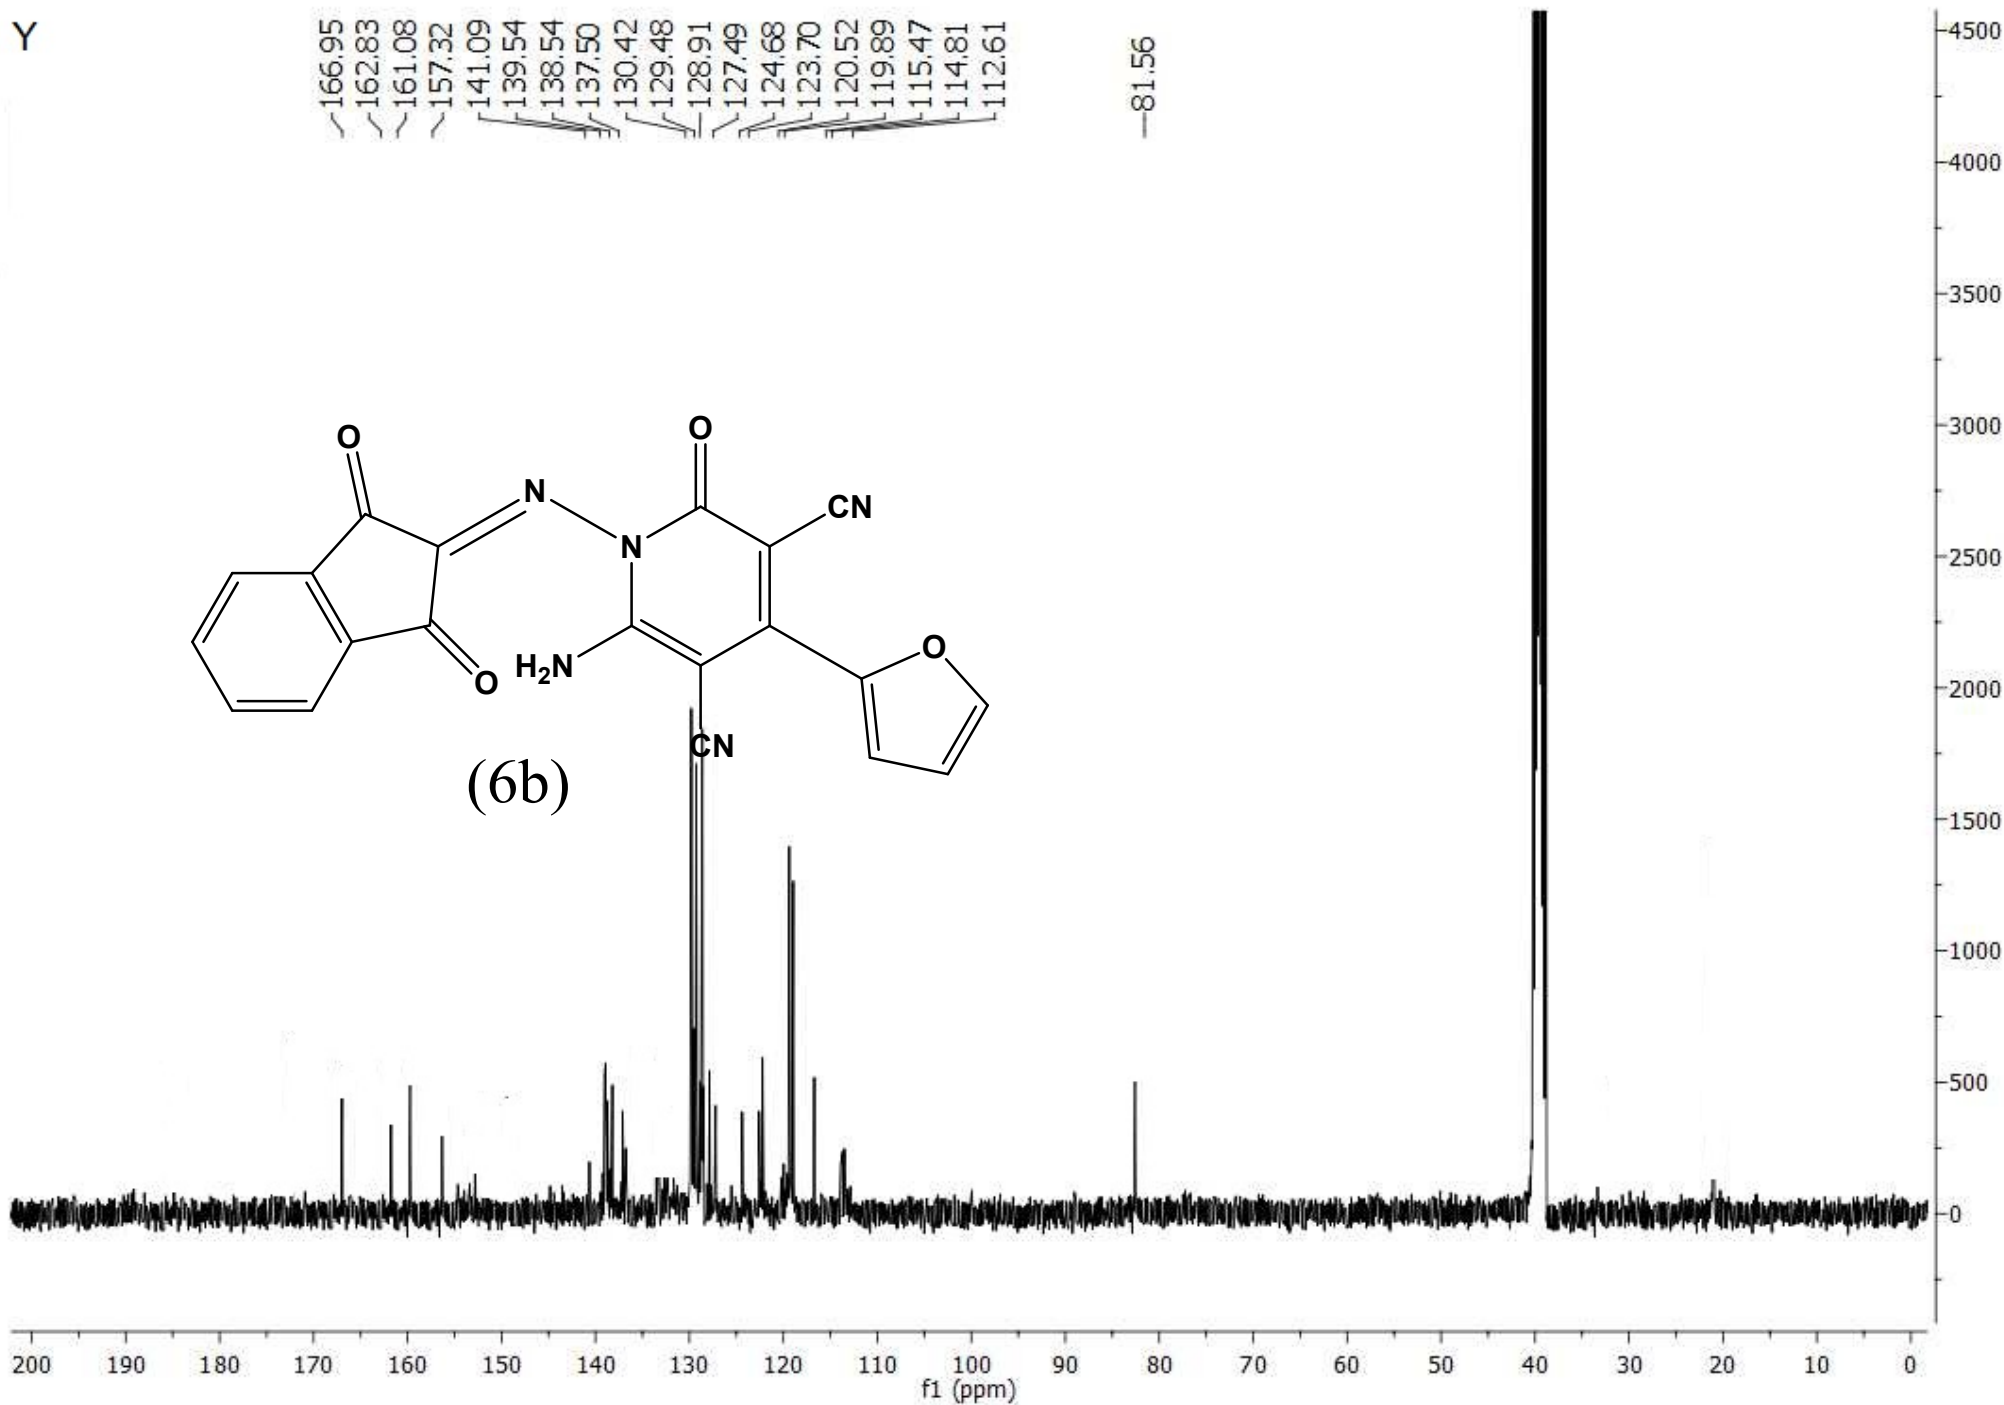

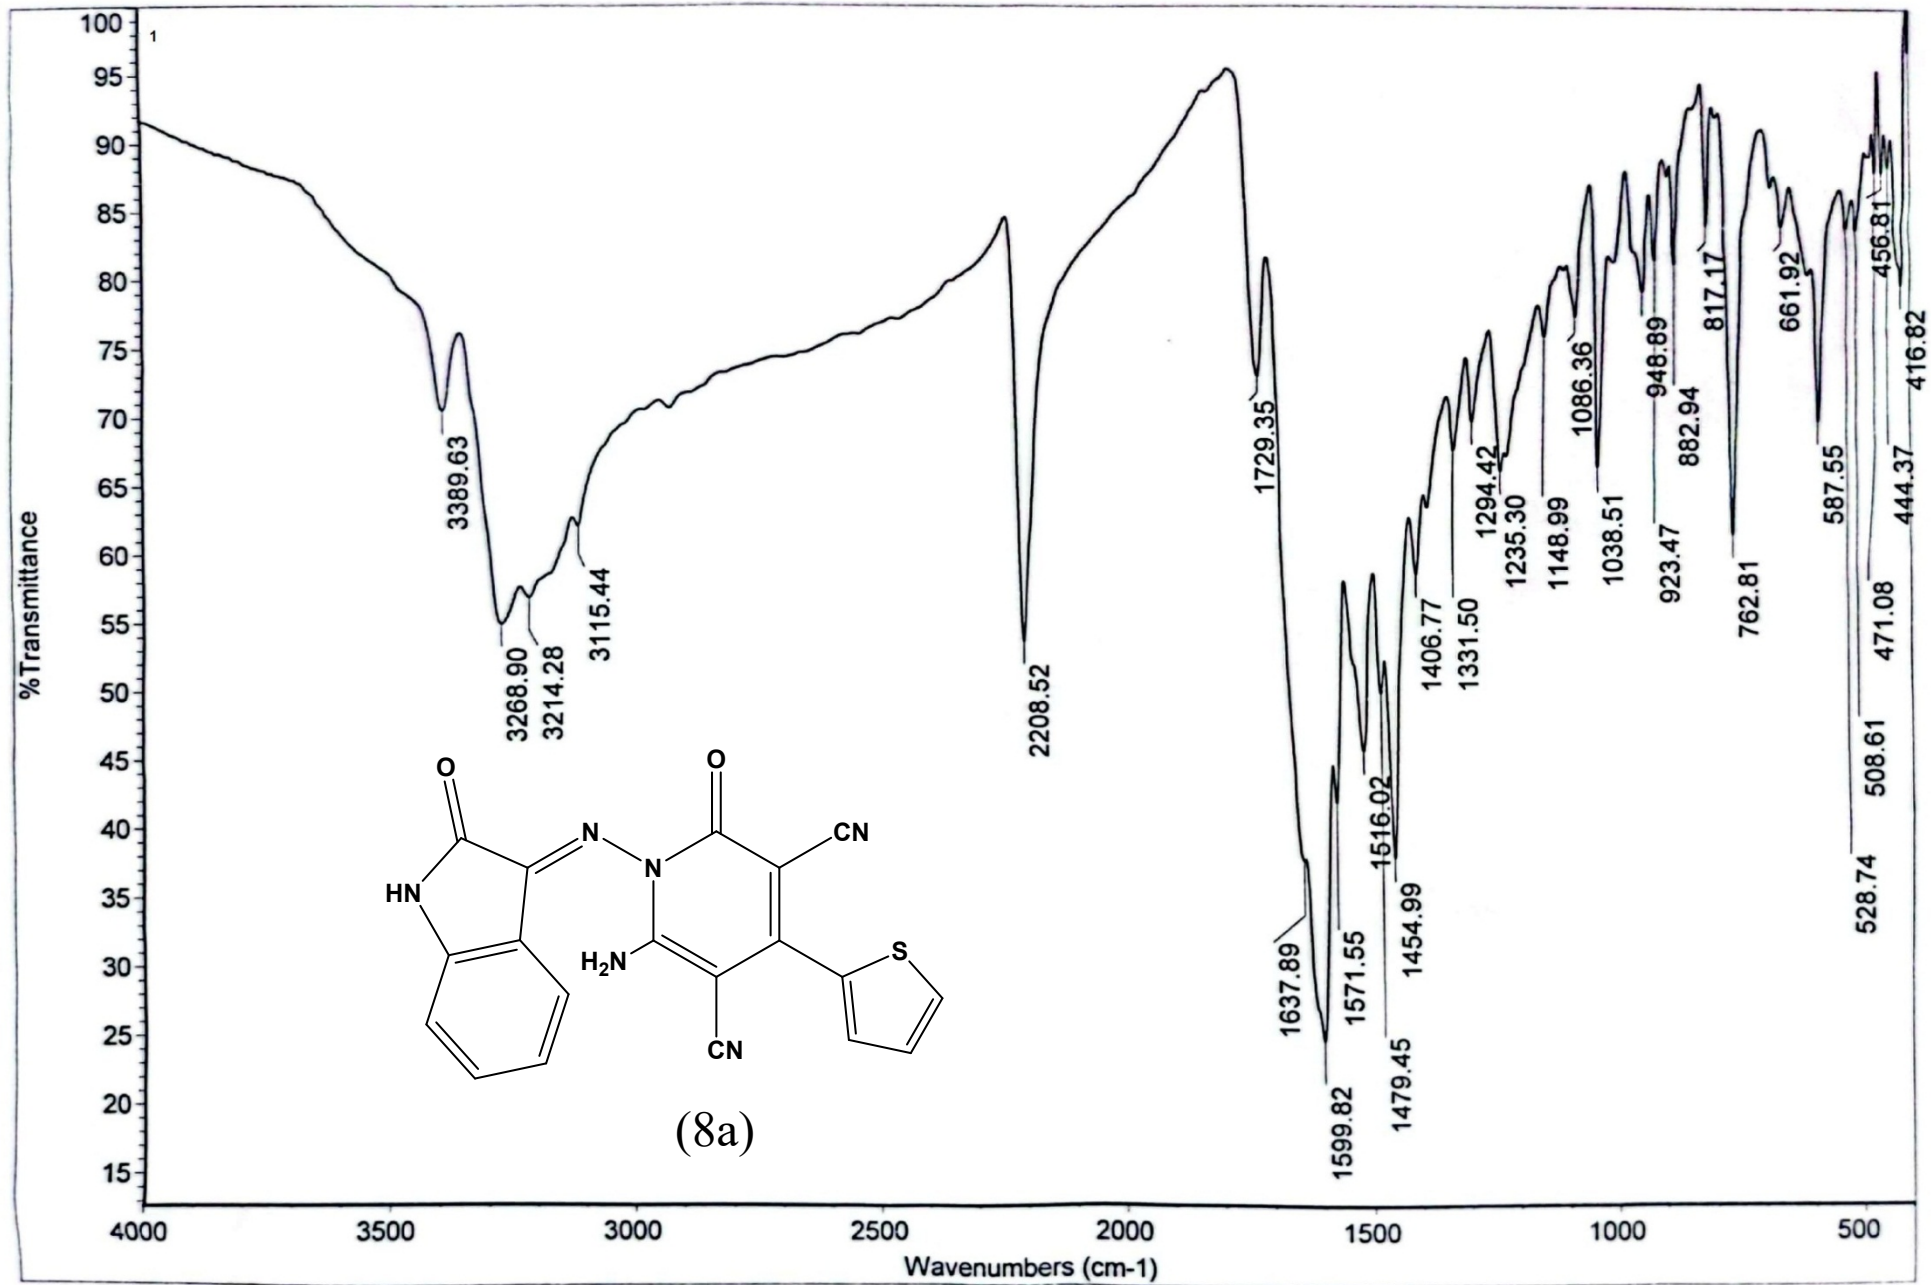

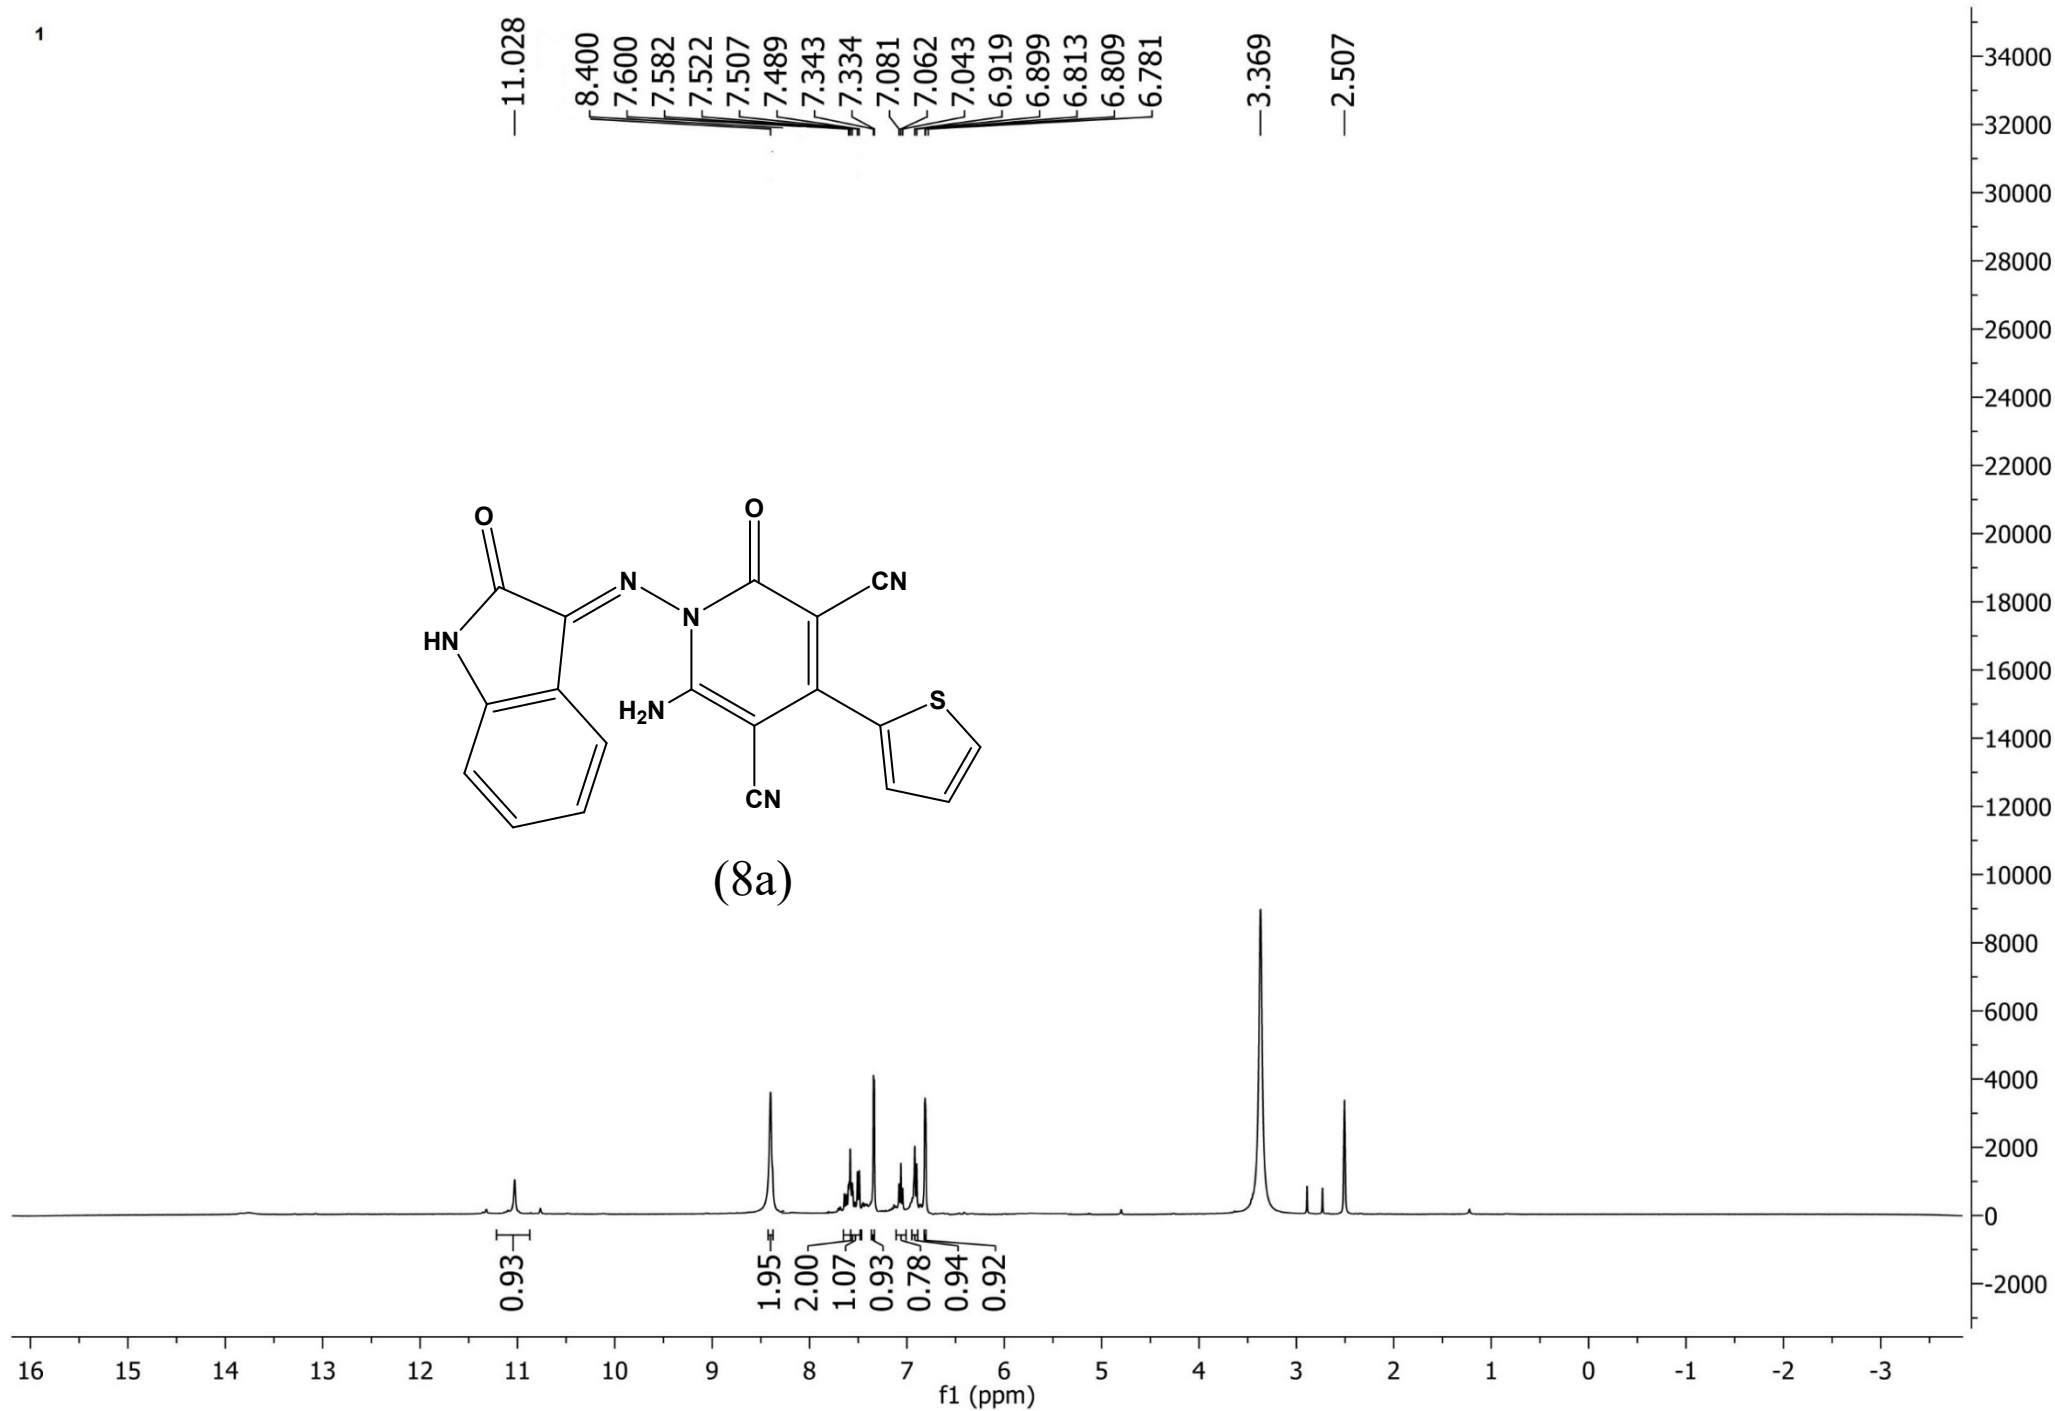

1

172.12  
166.09  
159.49  
155.08  
147.79  
145.54  
143.02  
142.63  
137.87  
129.71  
126.94  
122.87  
121.62  
119.01  
118.68  
114.28  
114.10  
109.15

-75.34

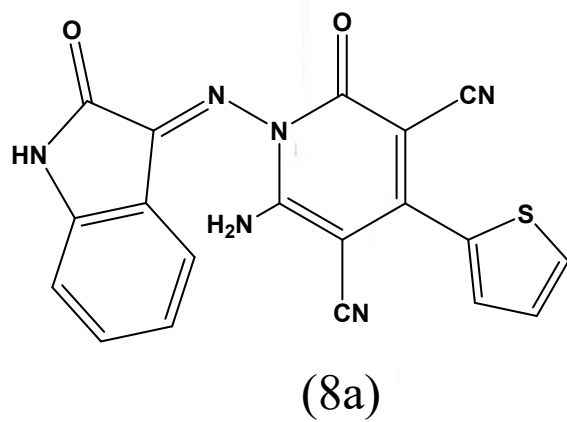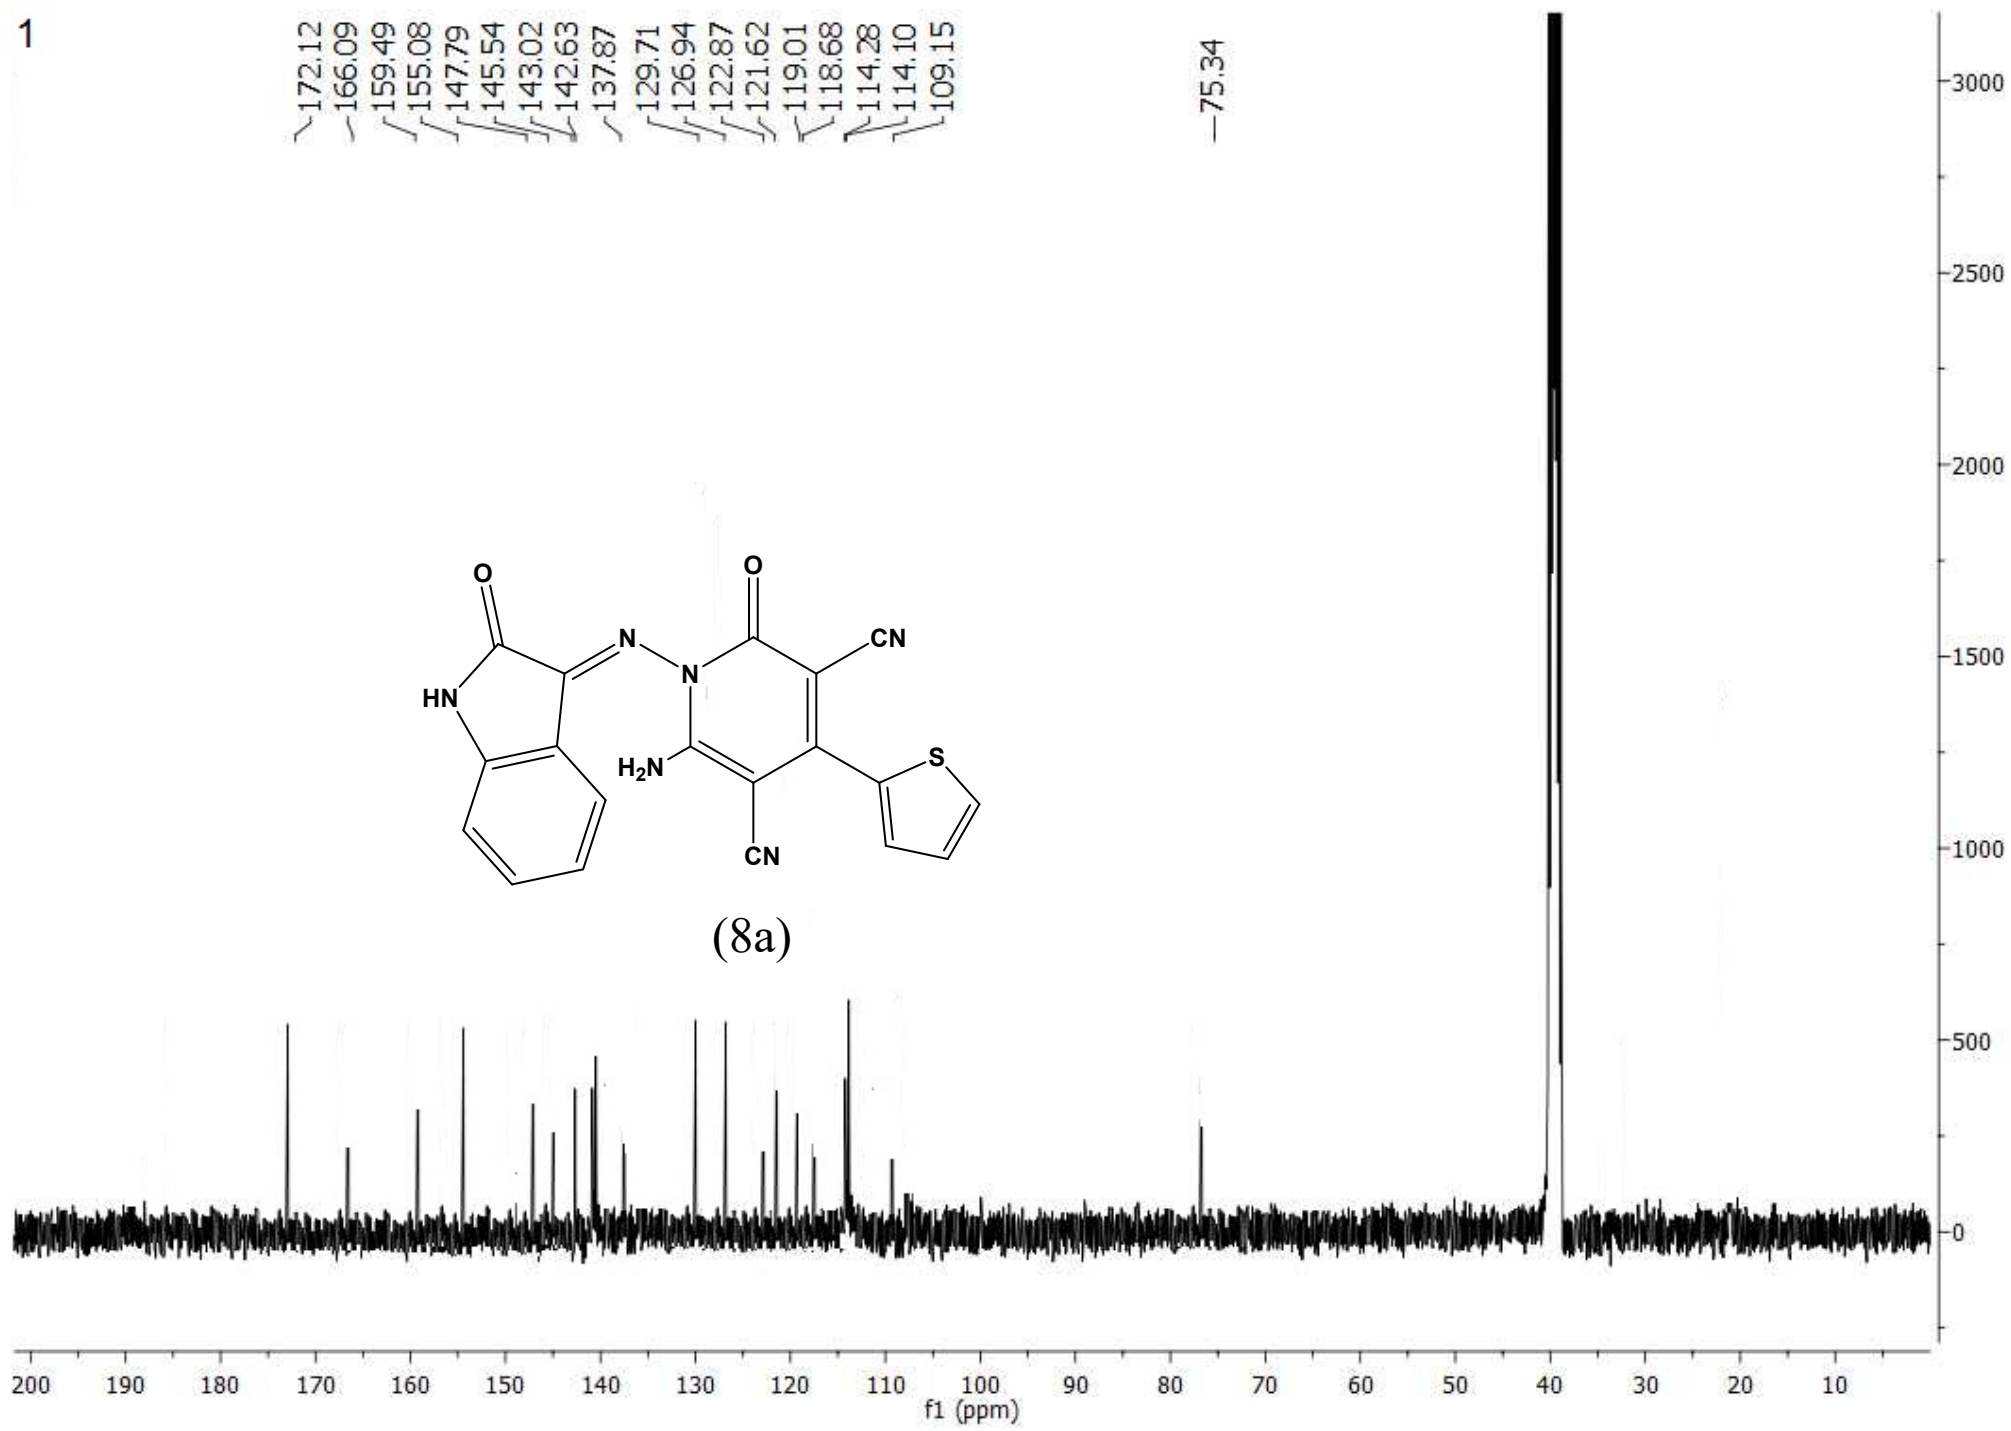

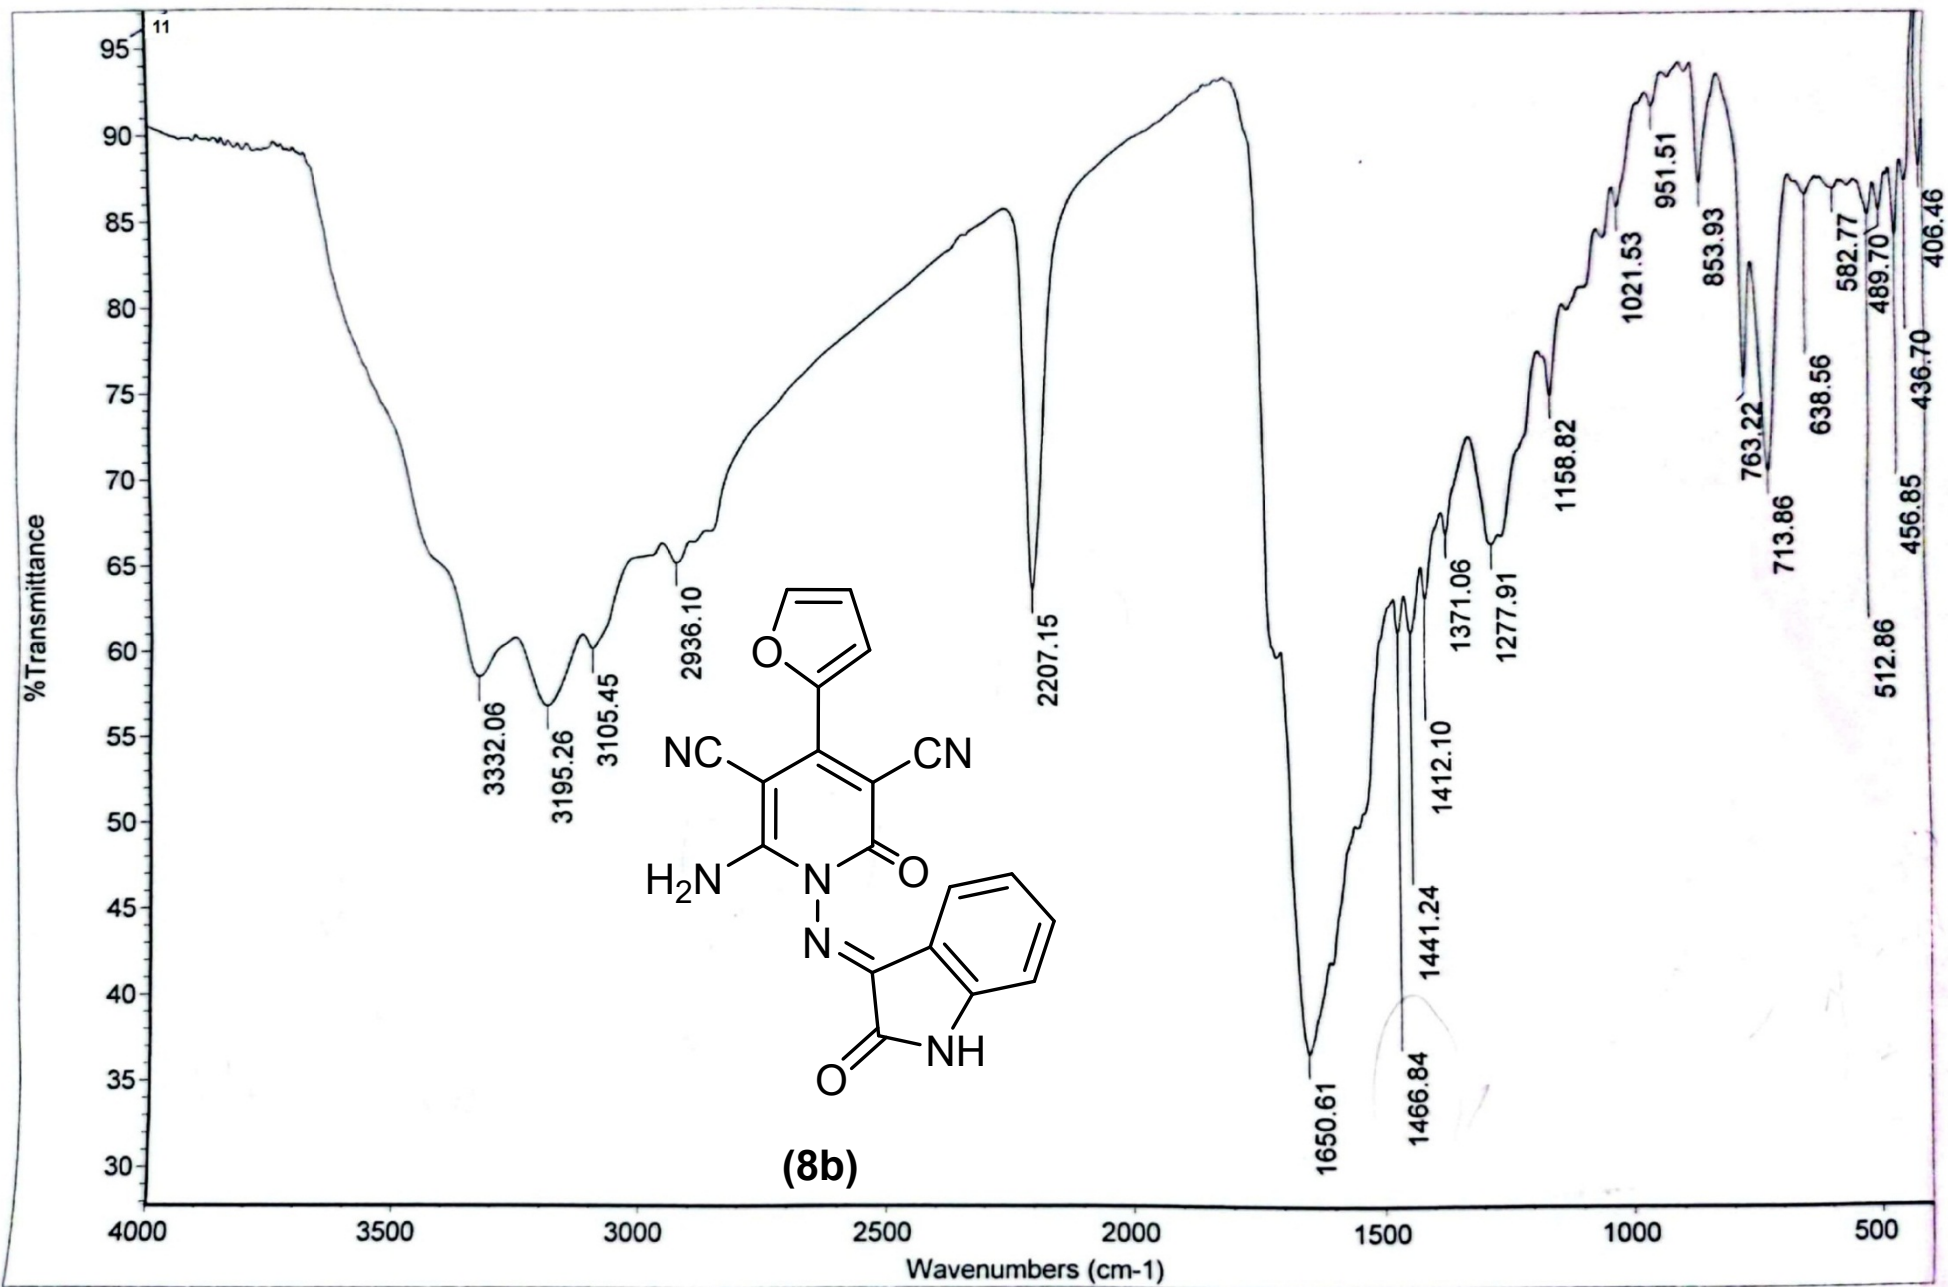

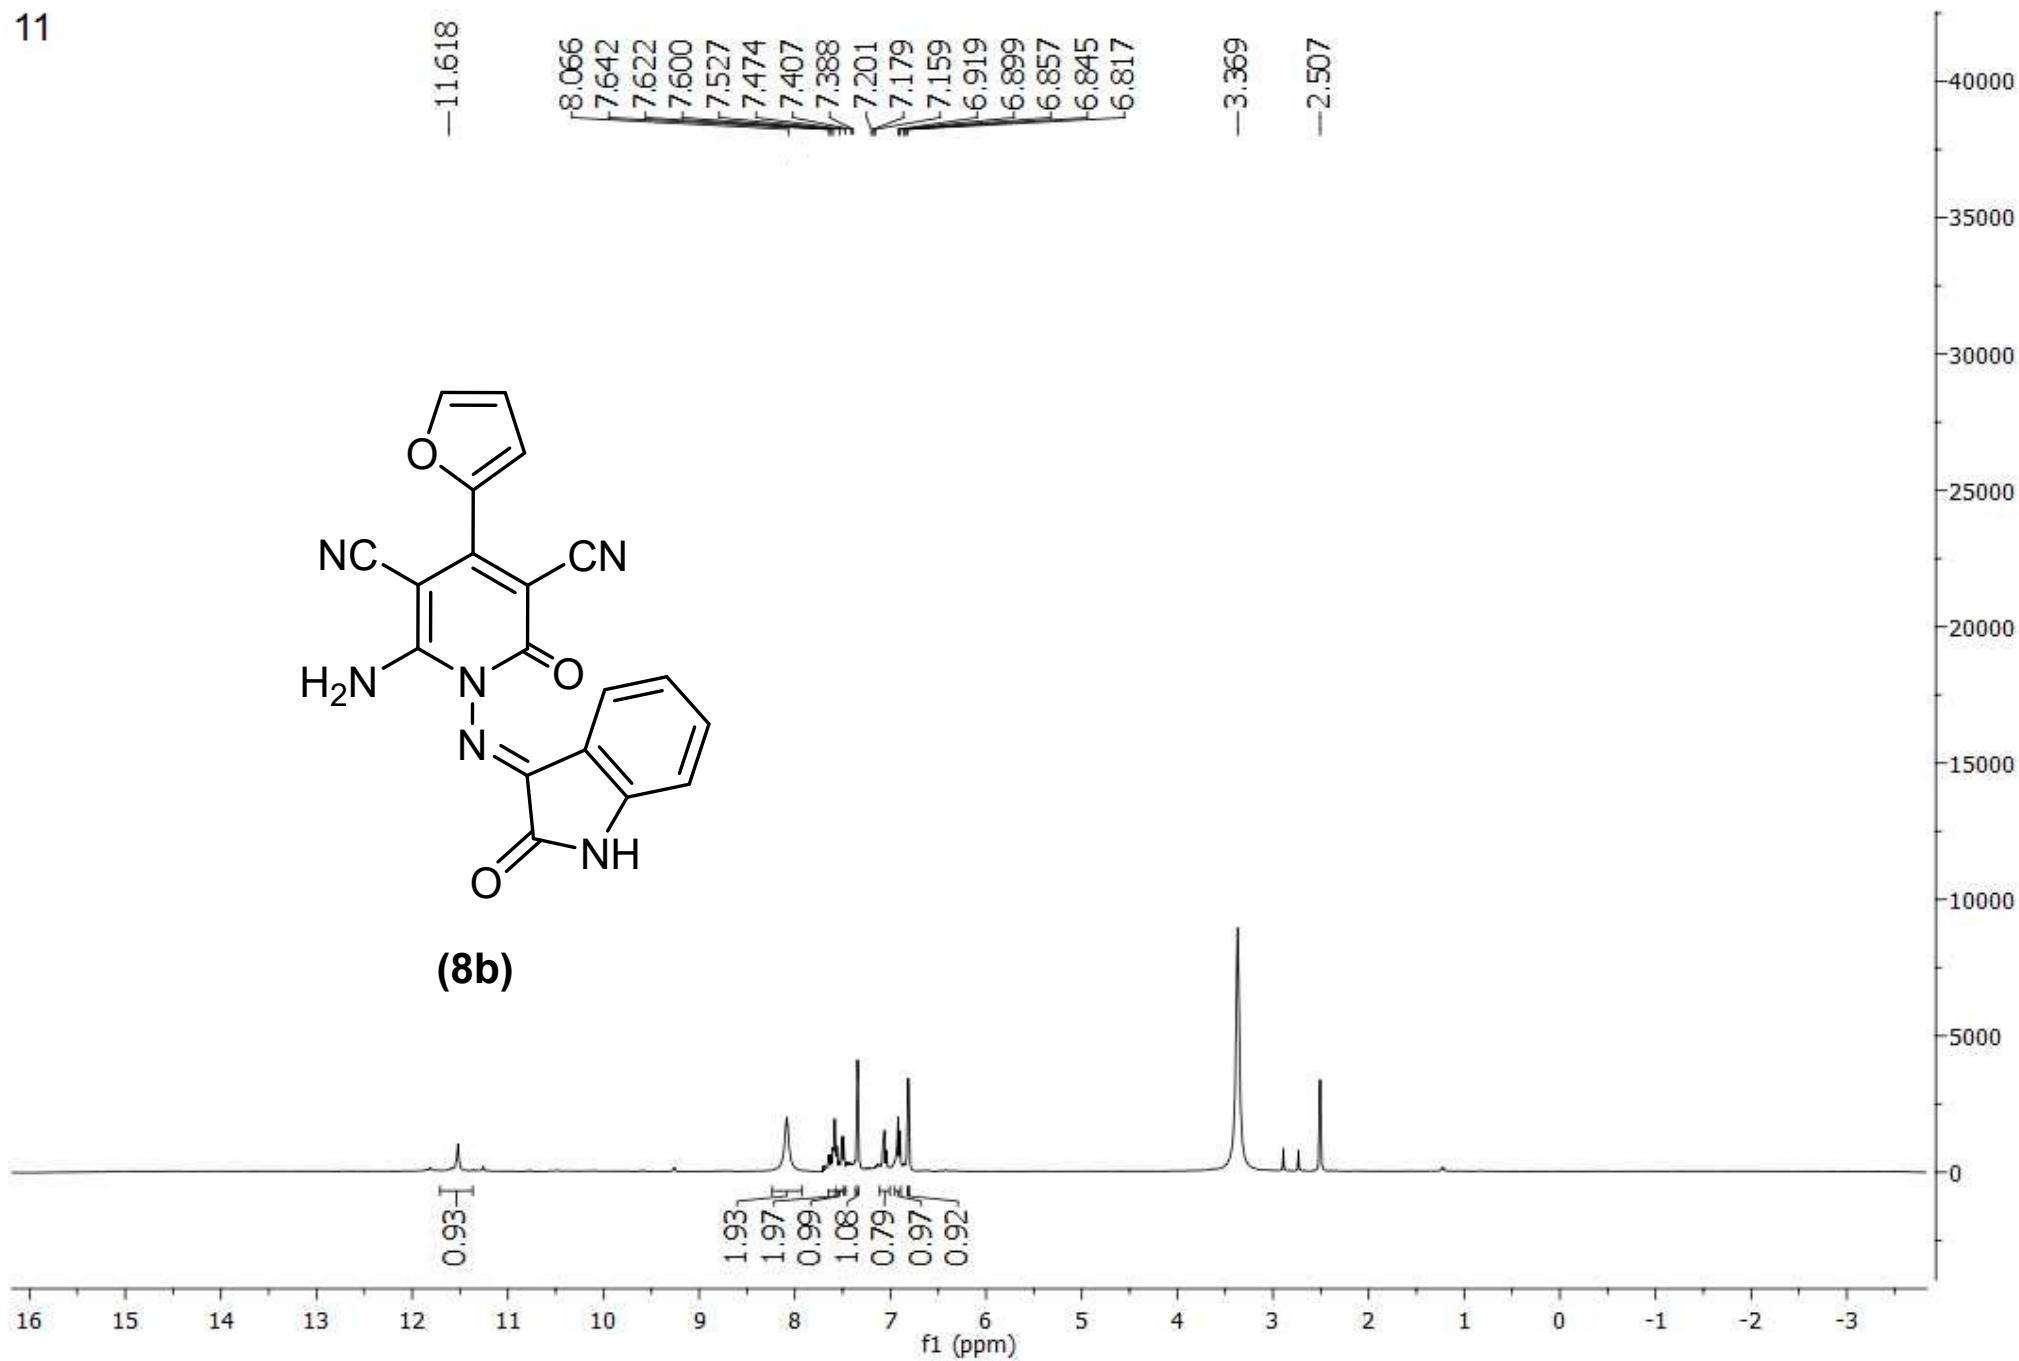

11

171.16  
164.82  
158.28  
151.55  
147.10  
144.25  
141.11  
140.38  
136.87  
128.11  
125.31  
122.31  
120.16  
118.85  
117.15  
114.33  
114.28  
112.66

-78.11

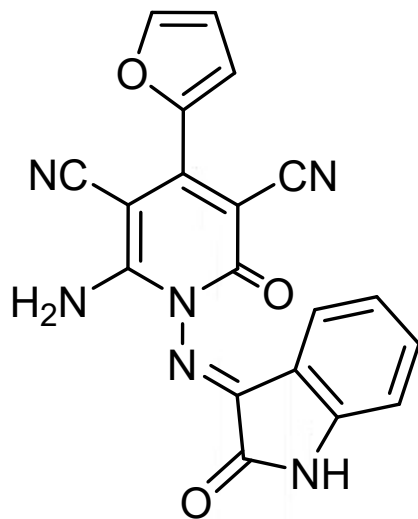

(8b)

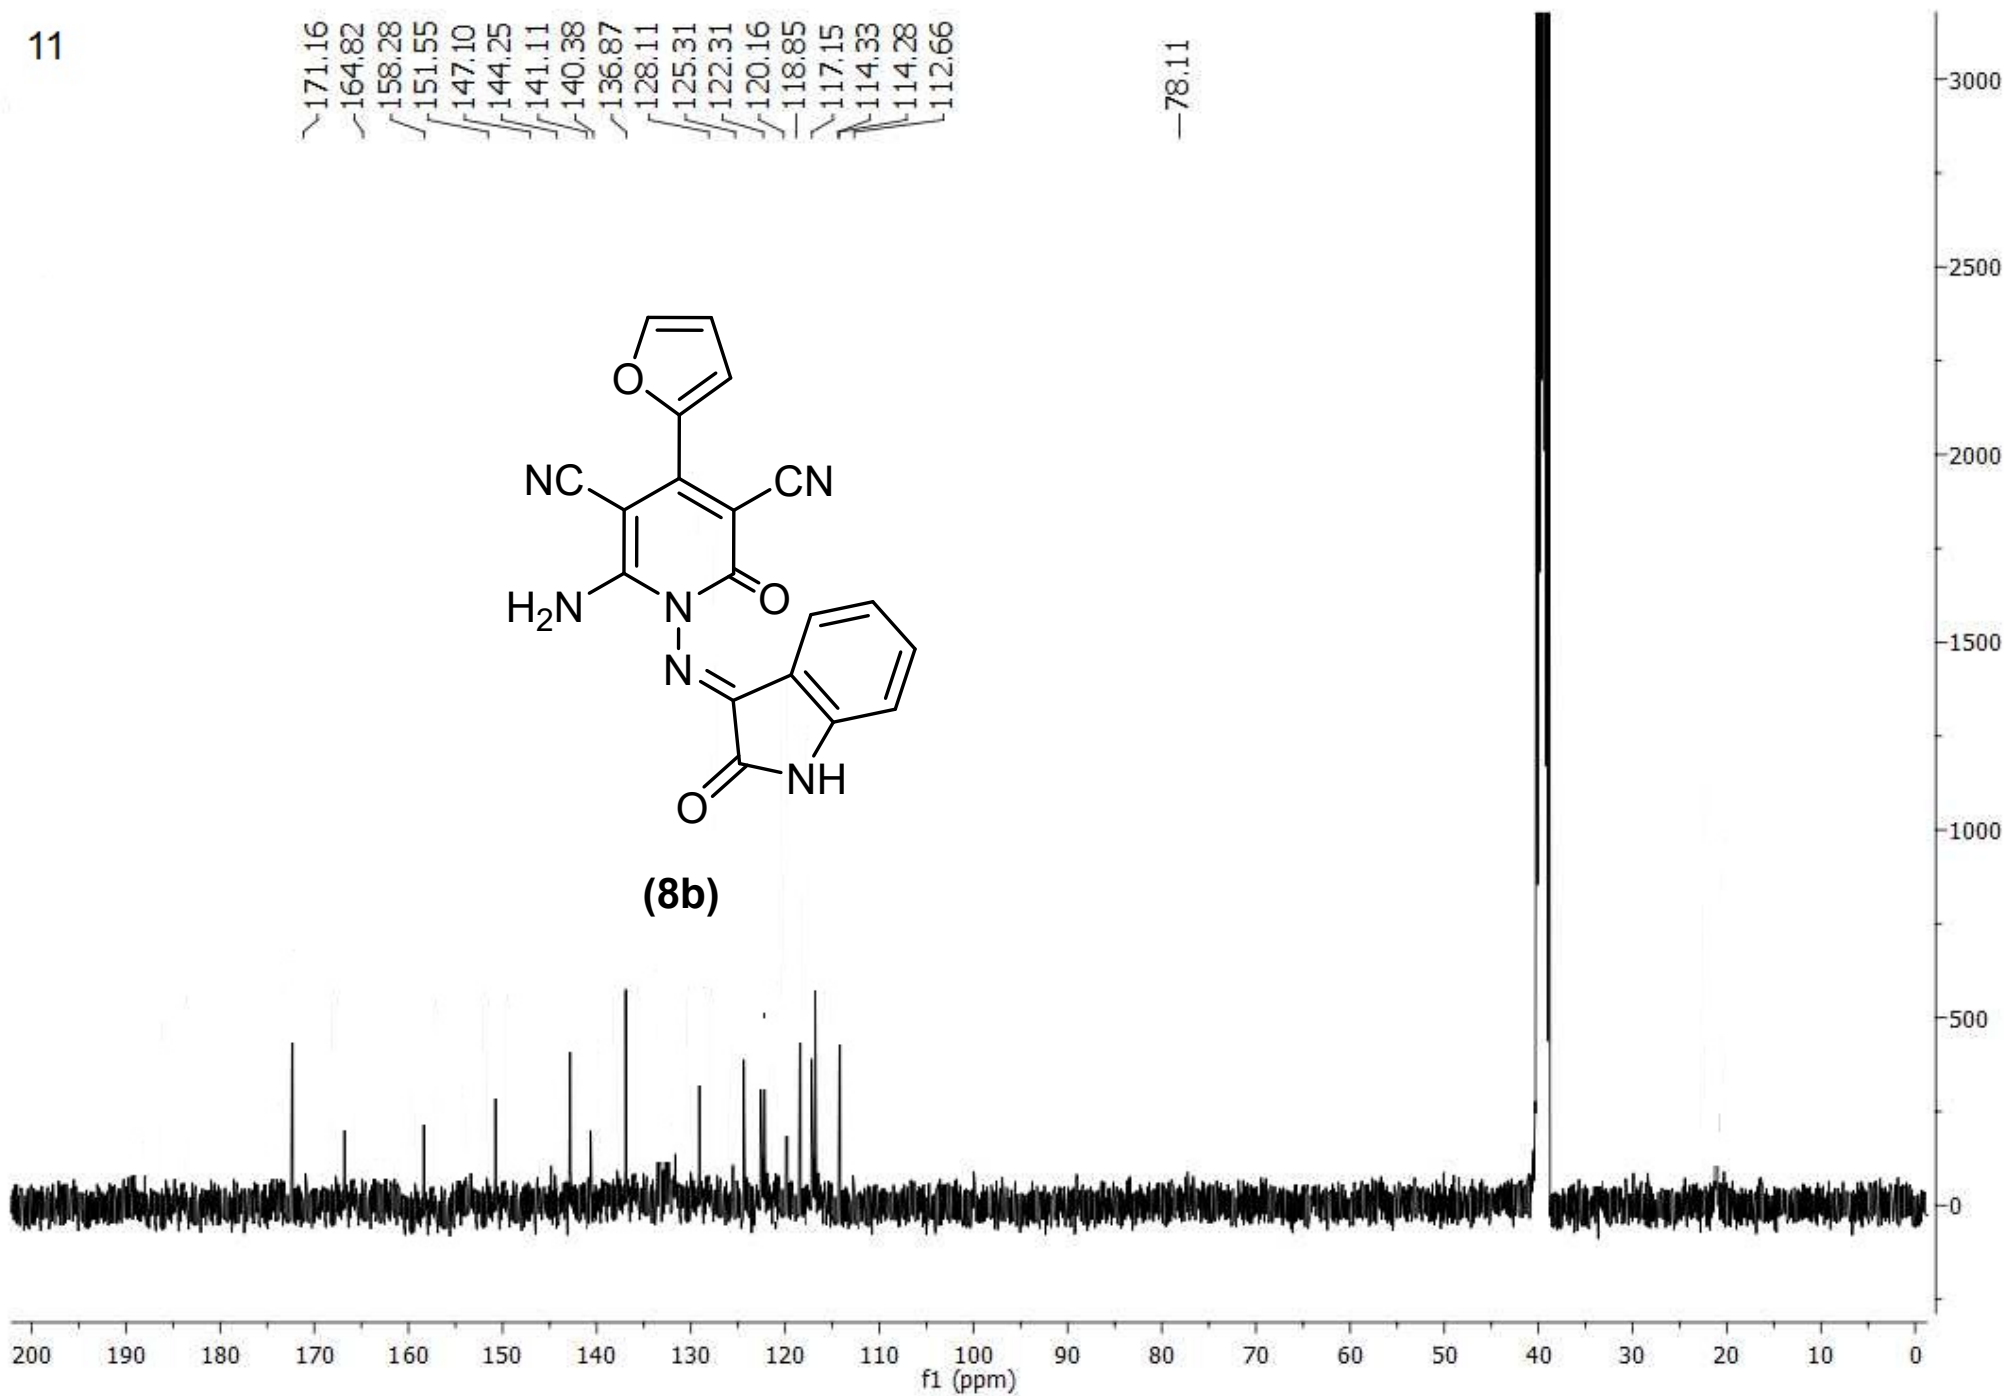

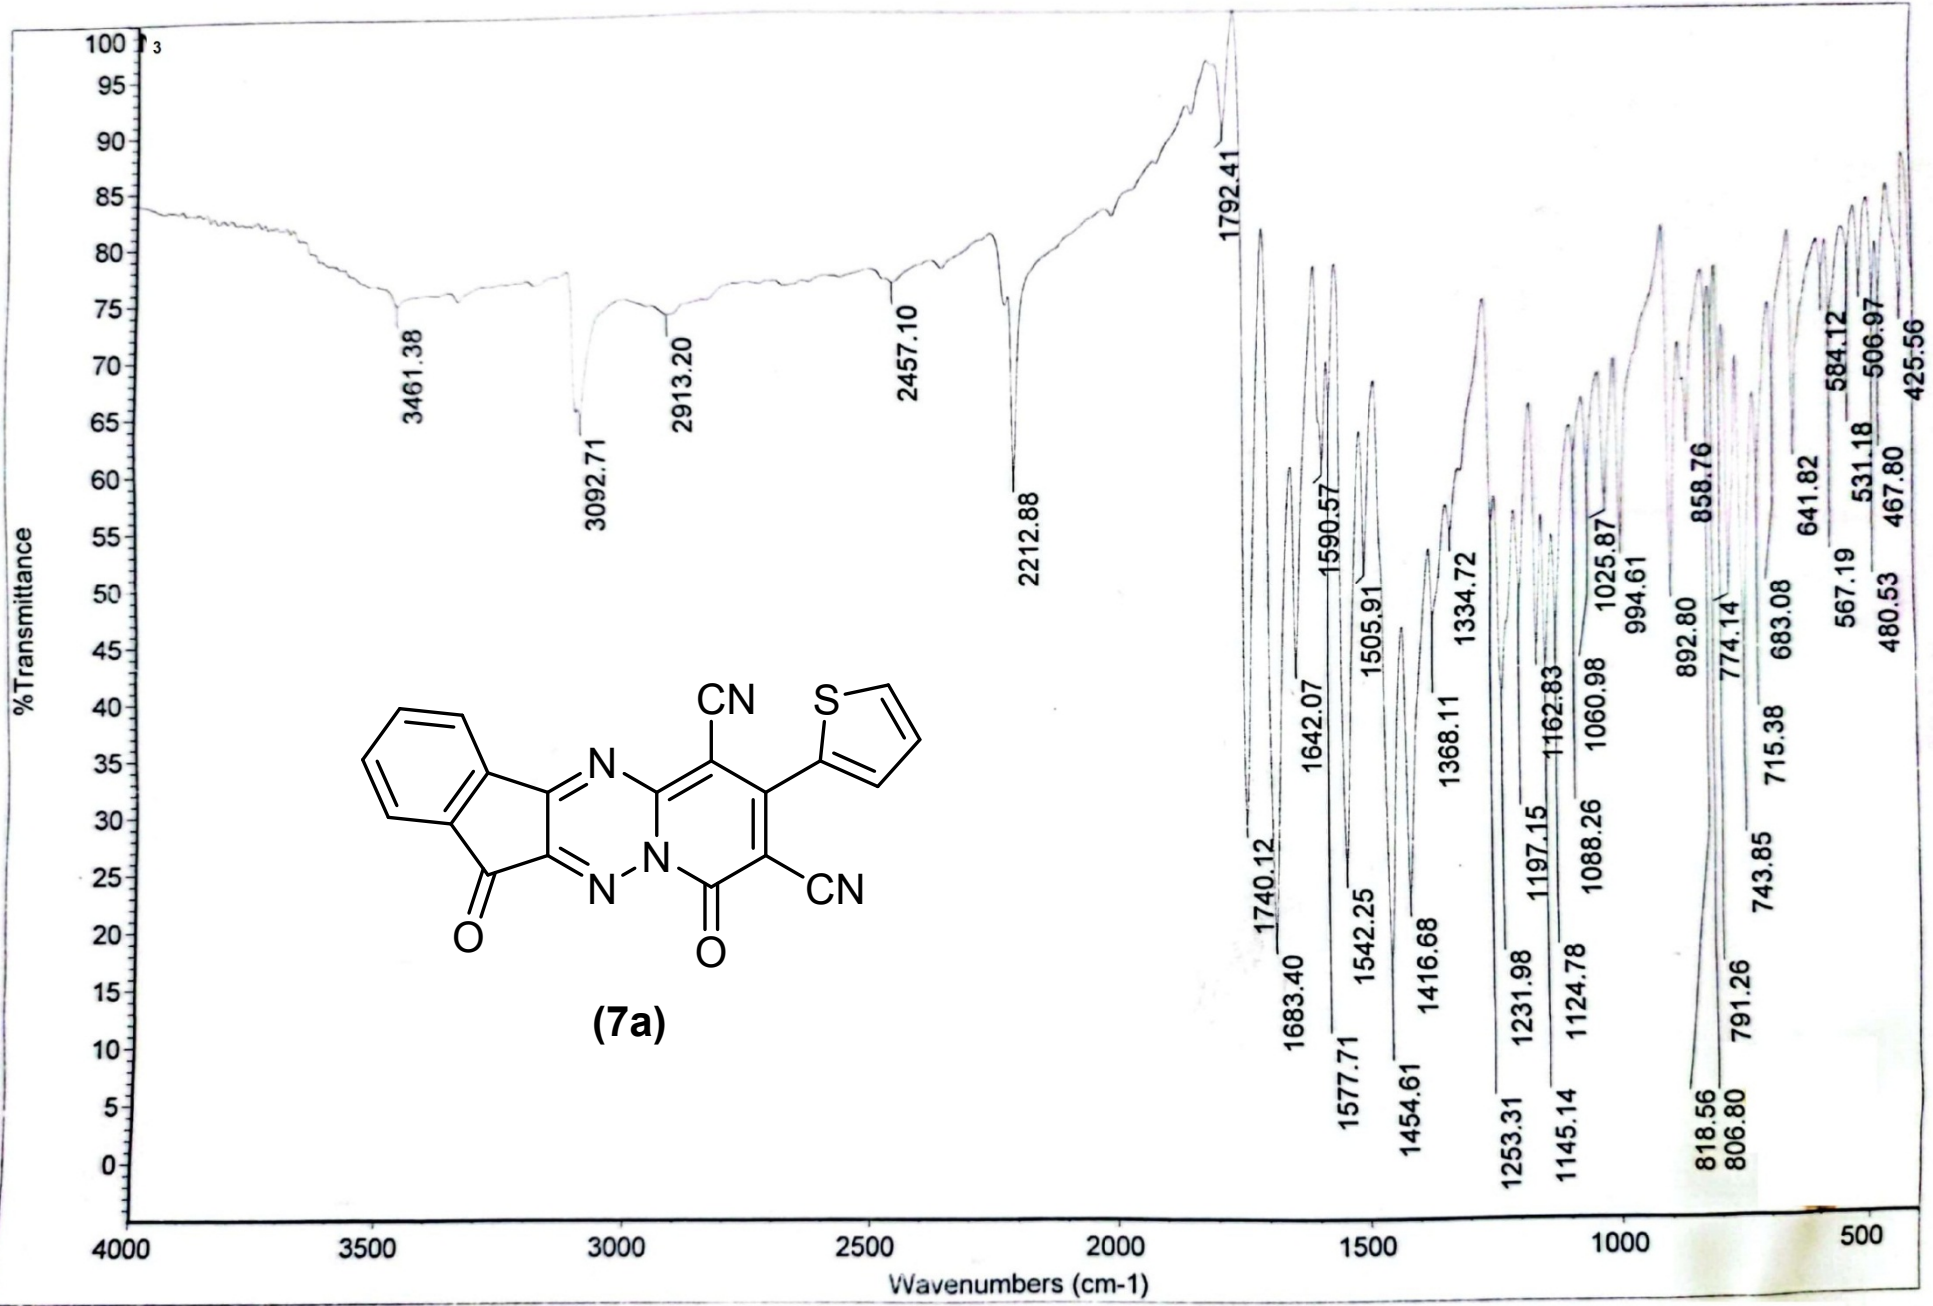



3

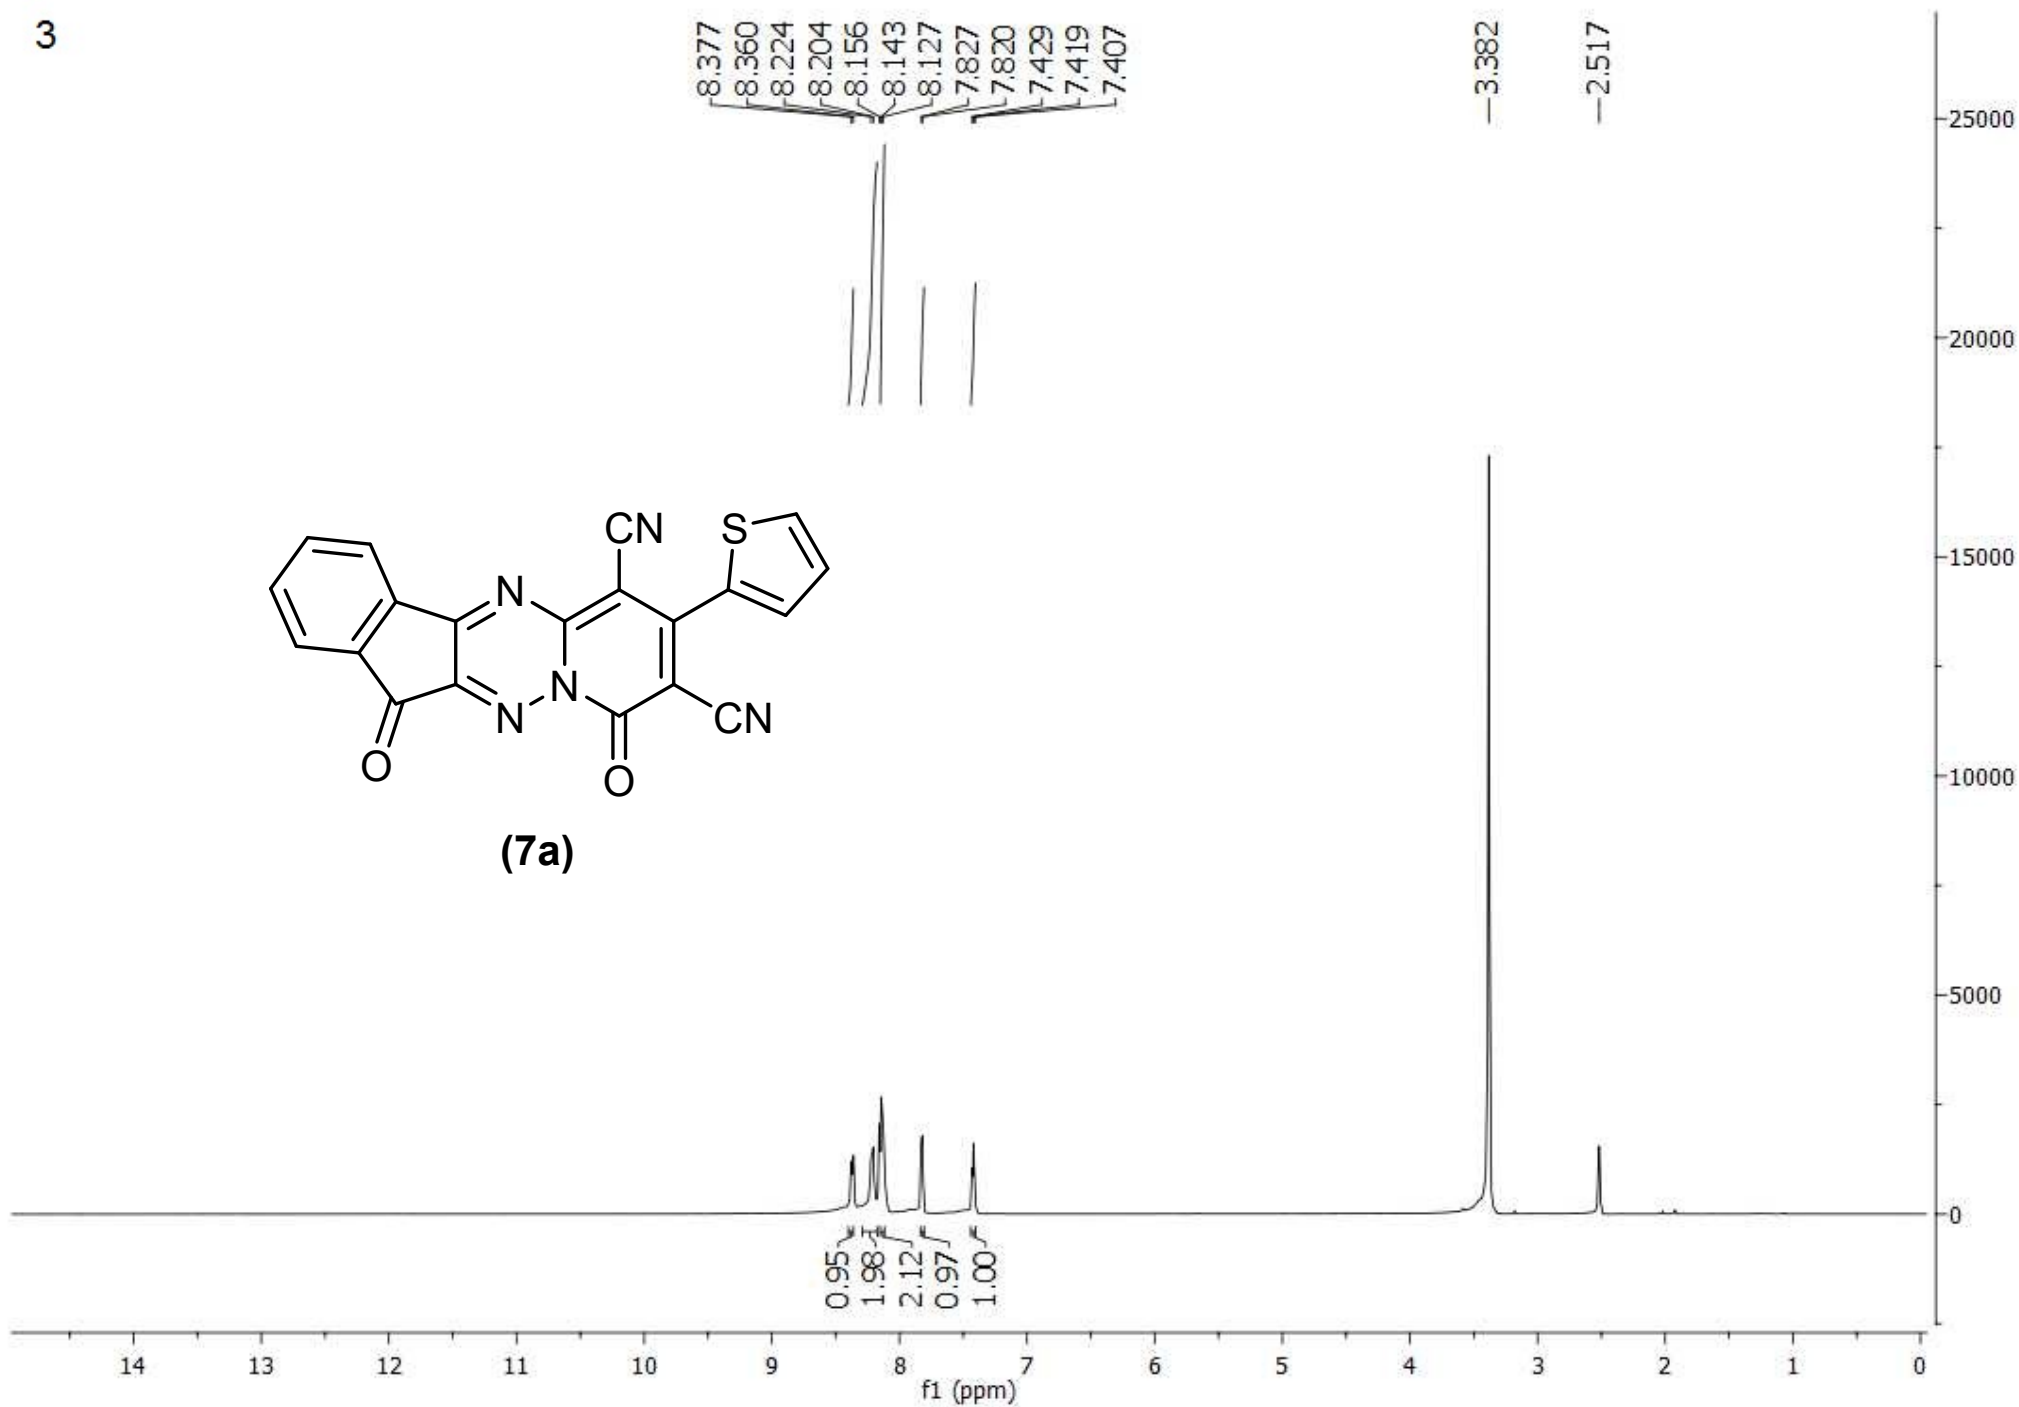

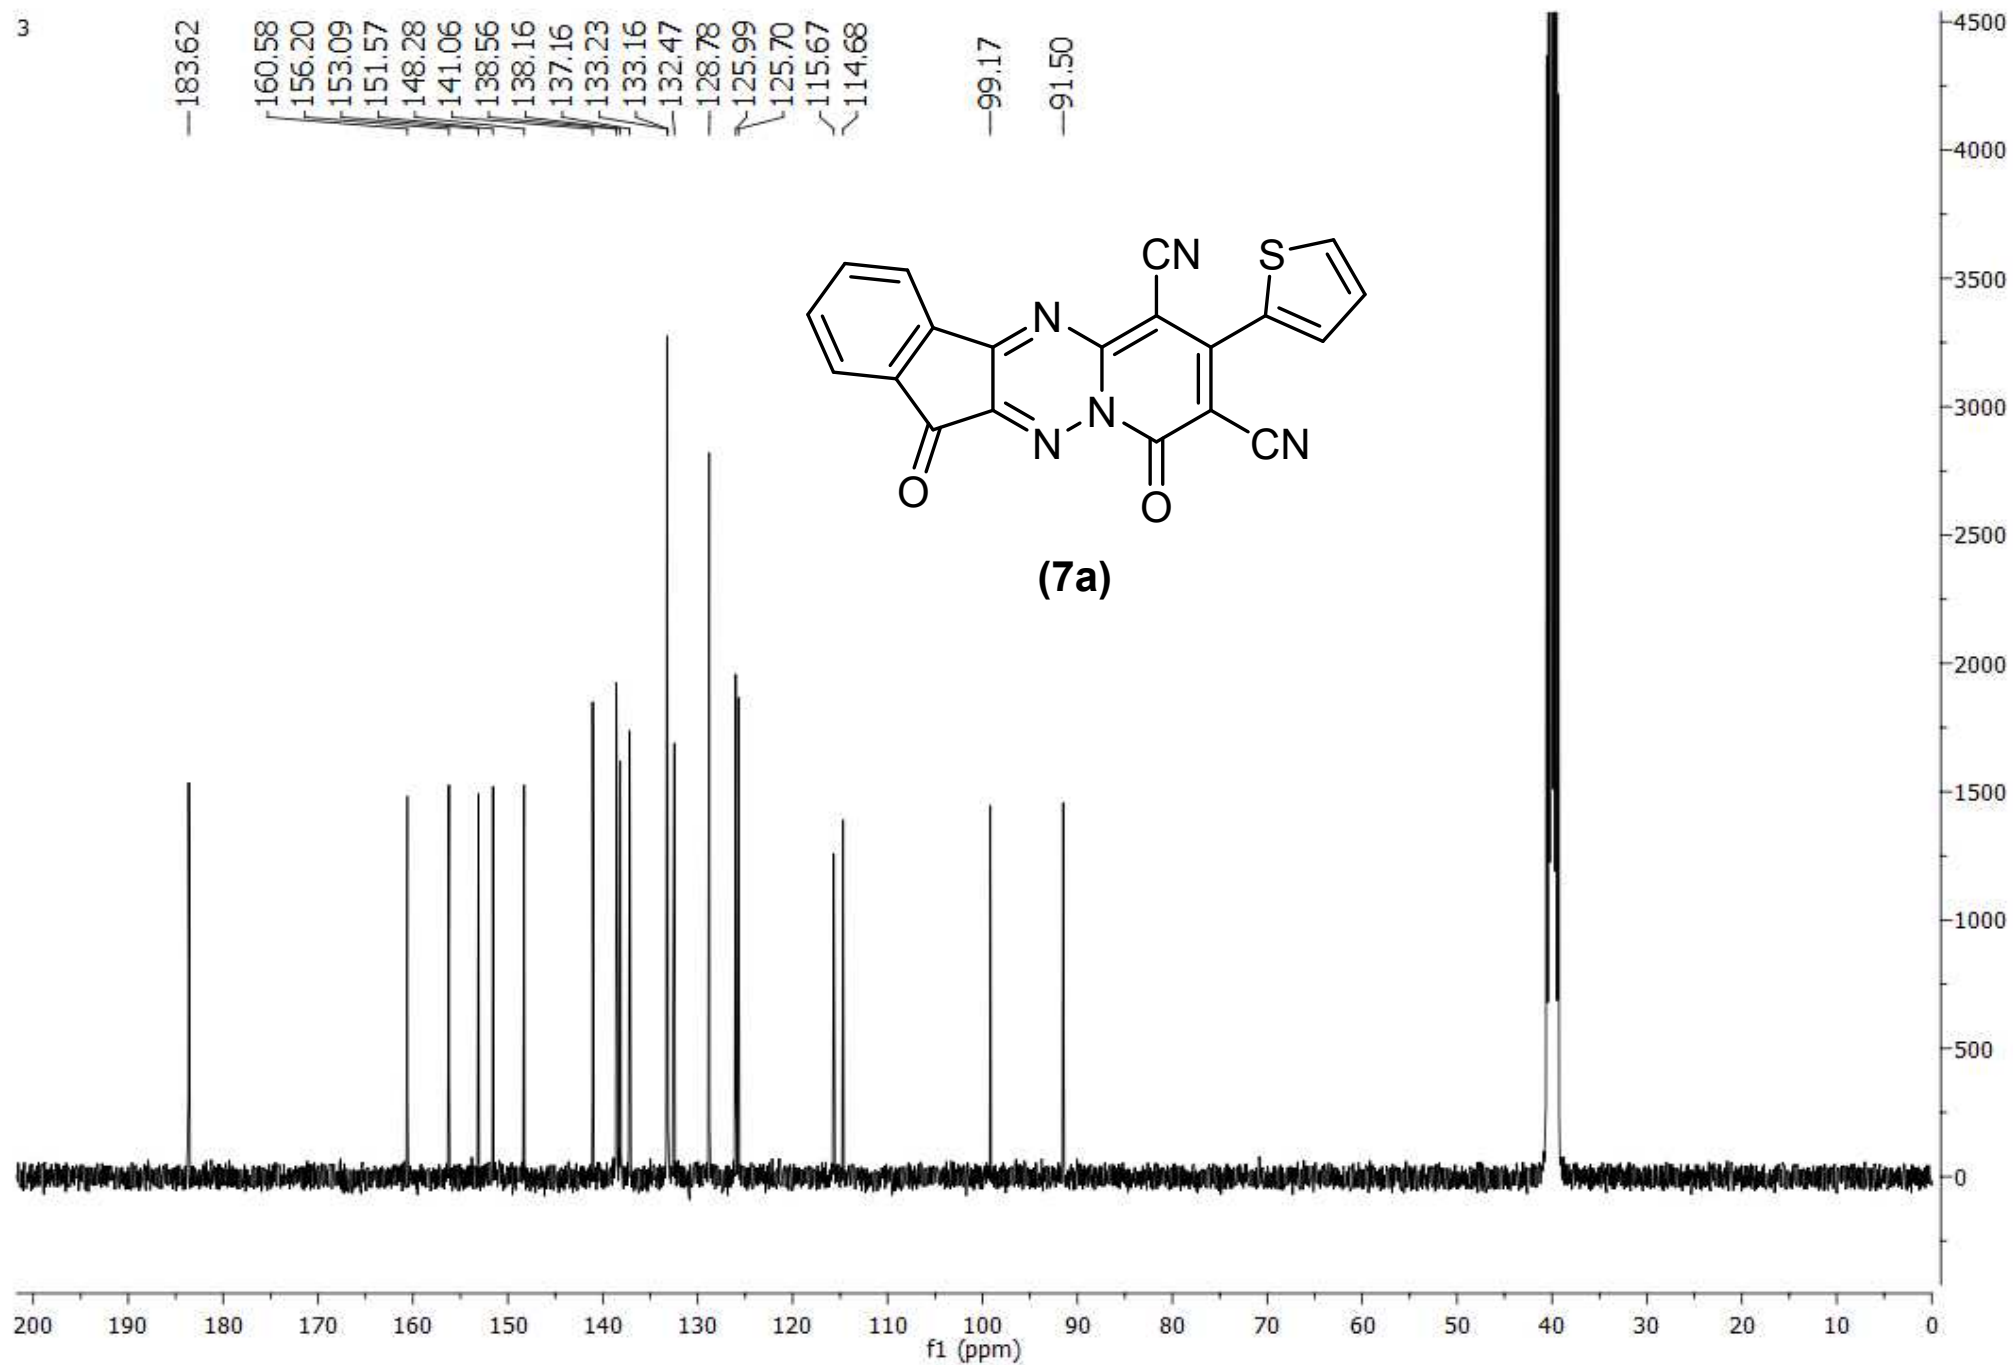

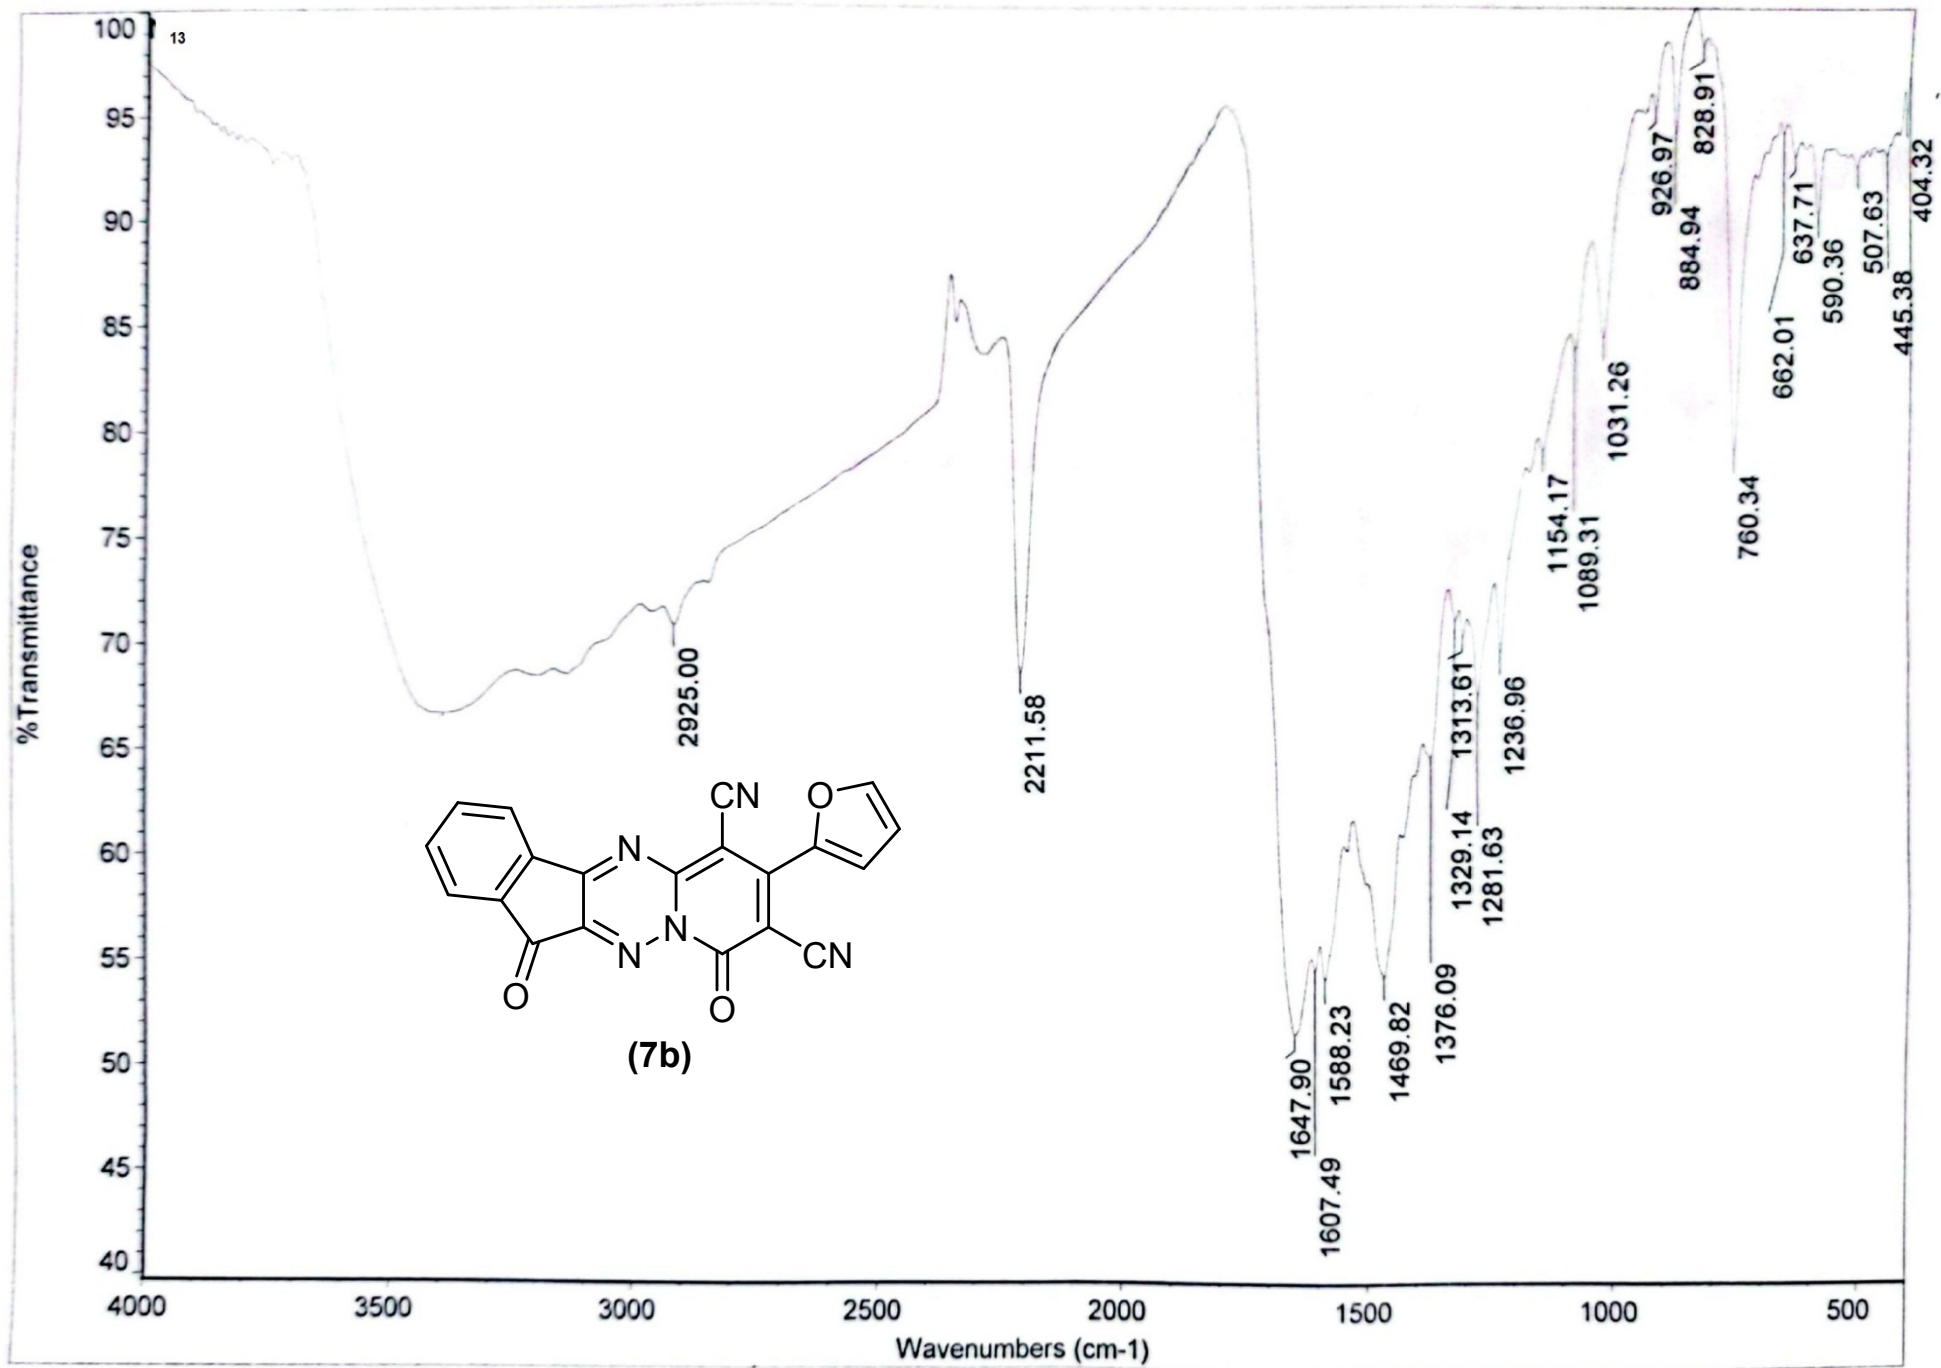

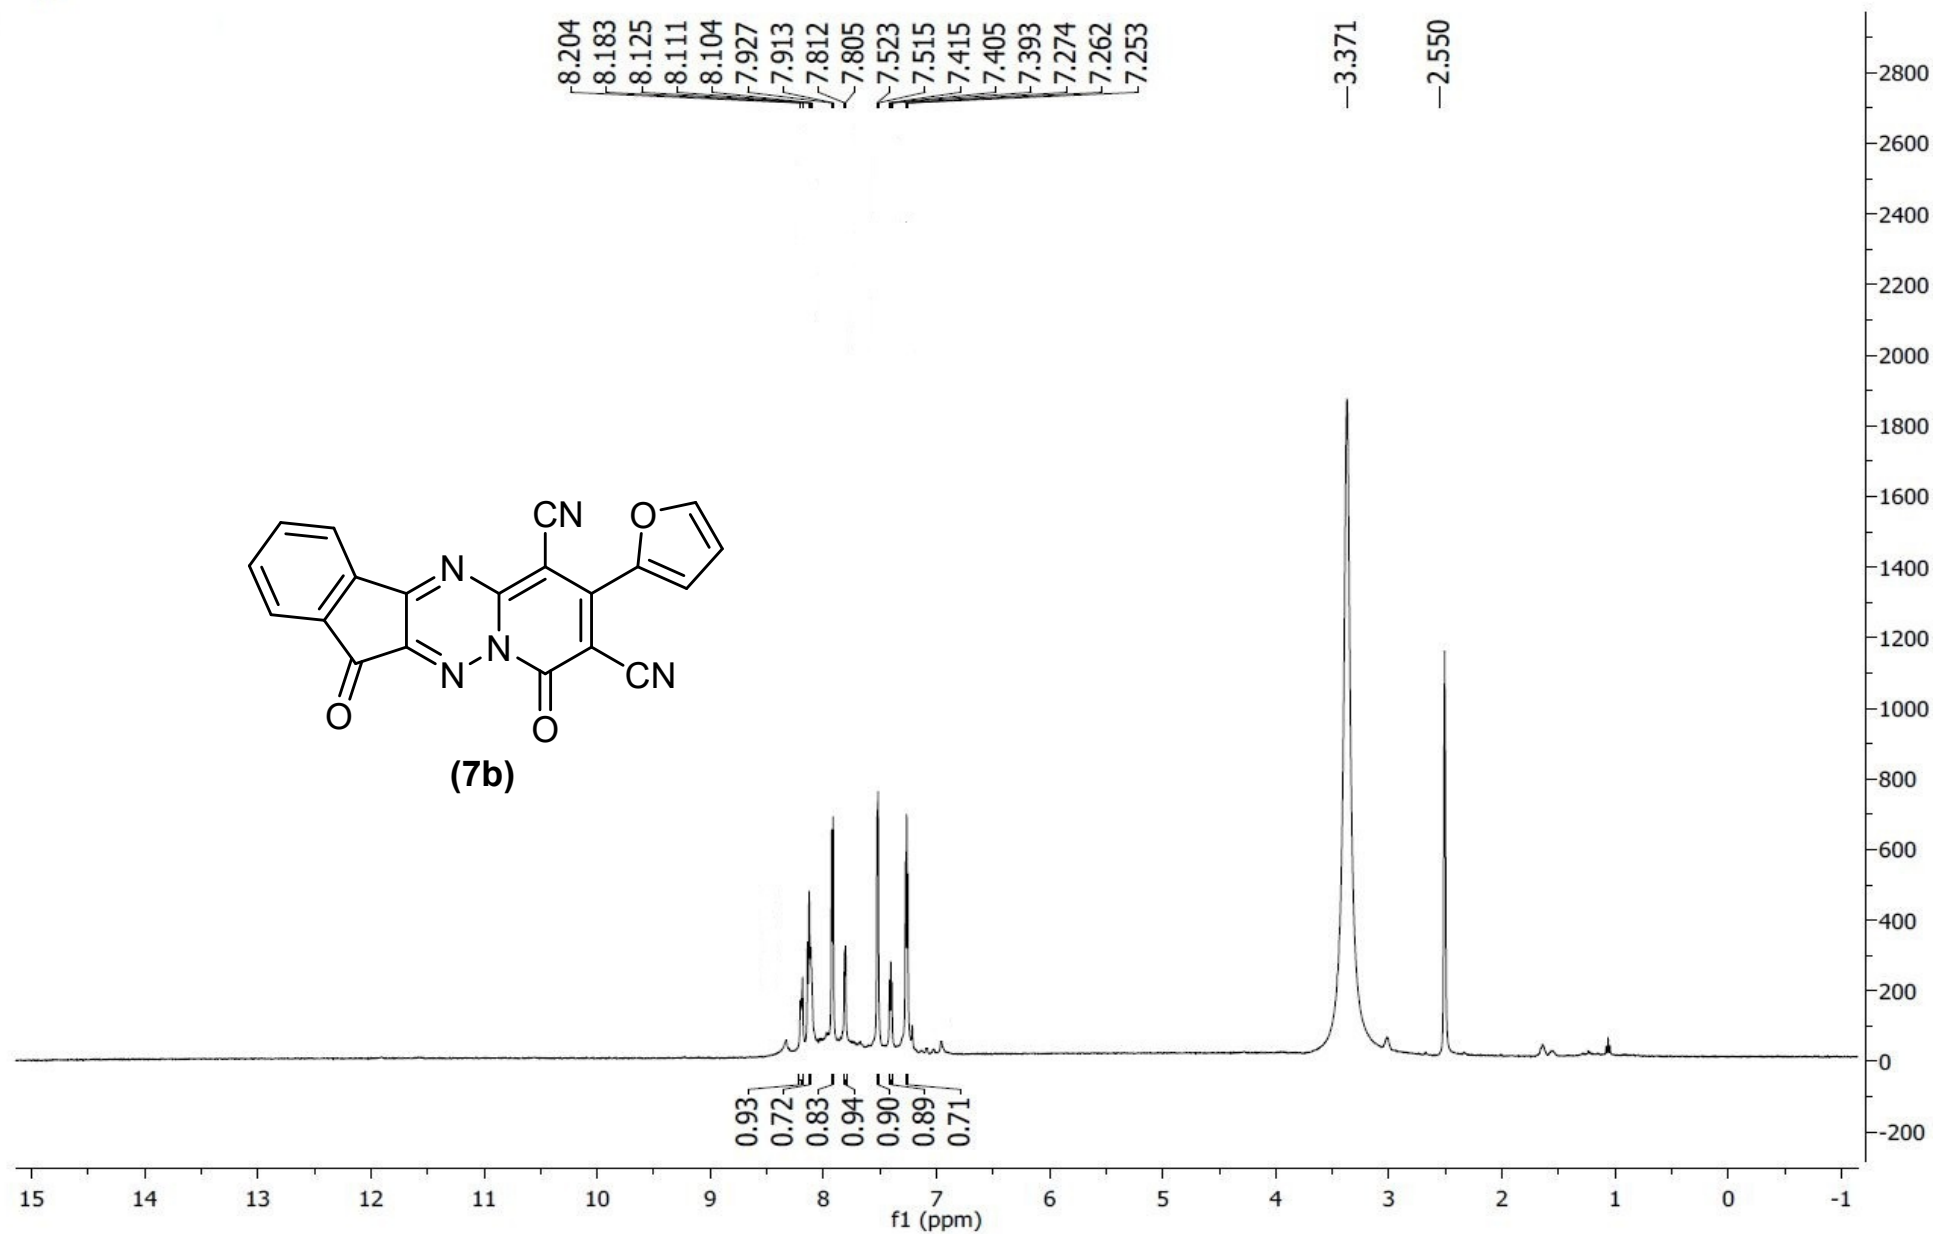

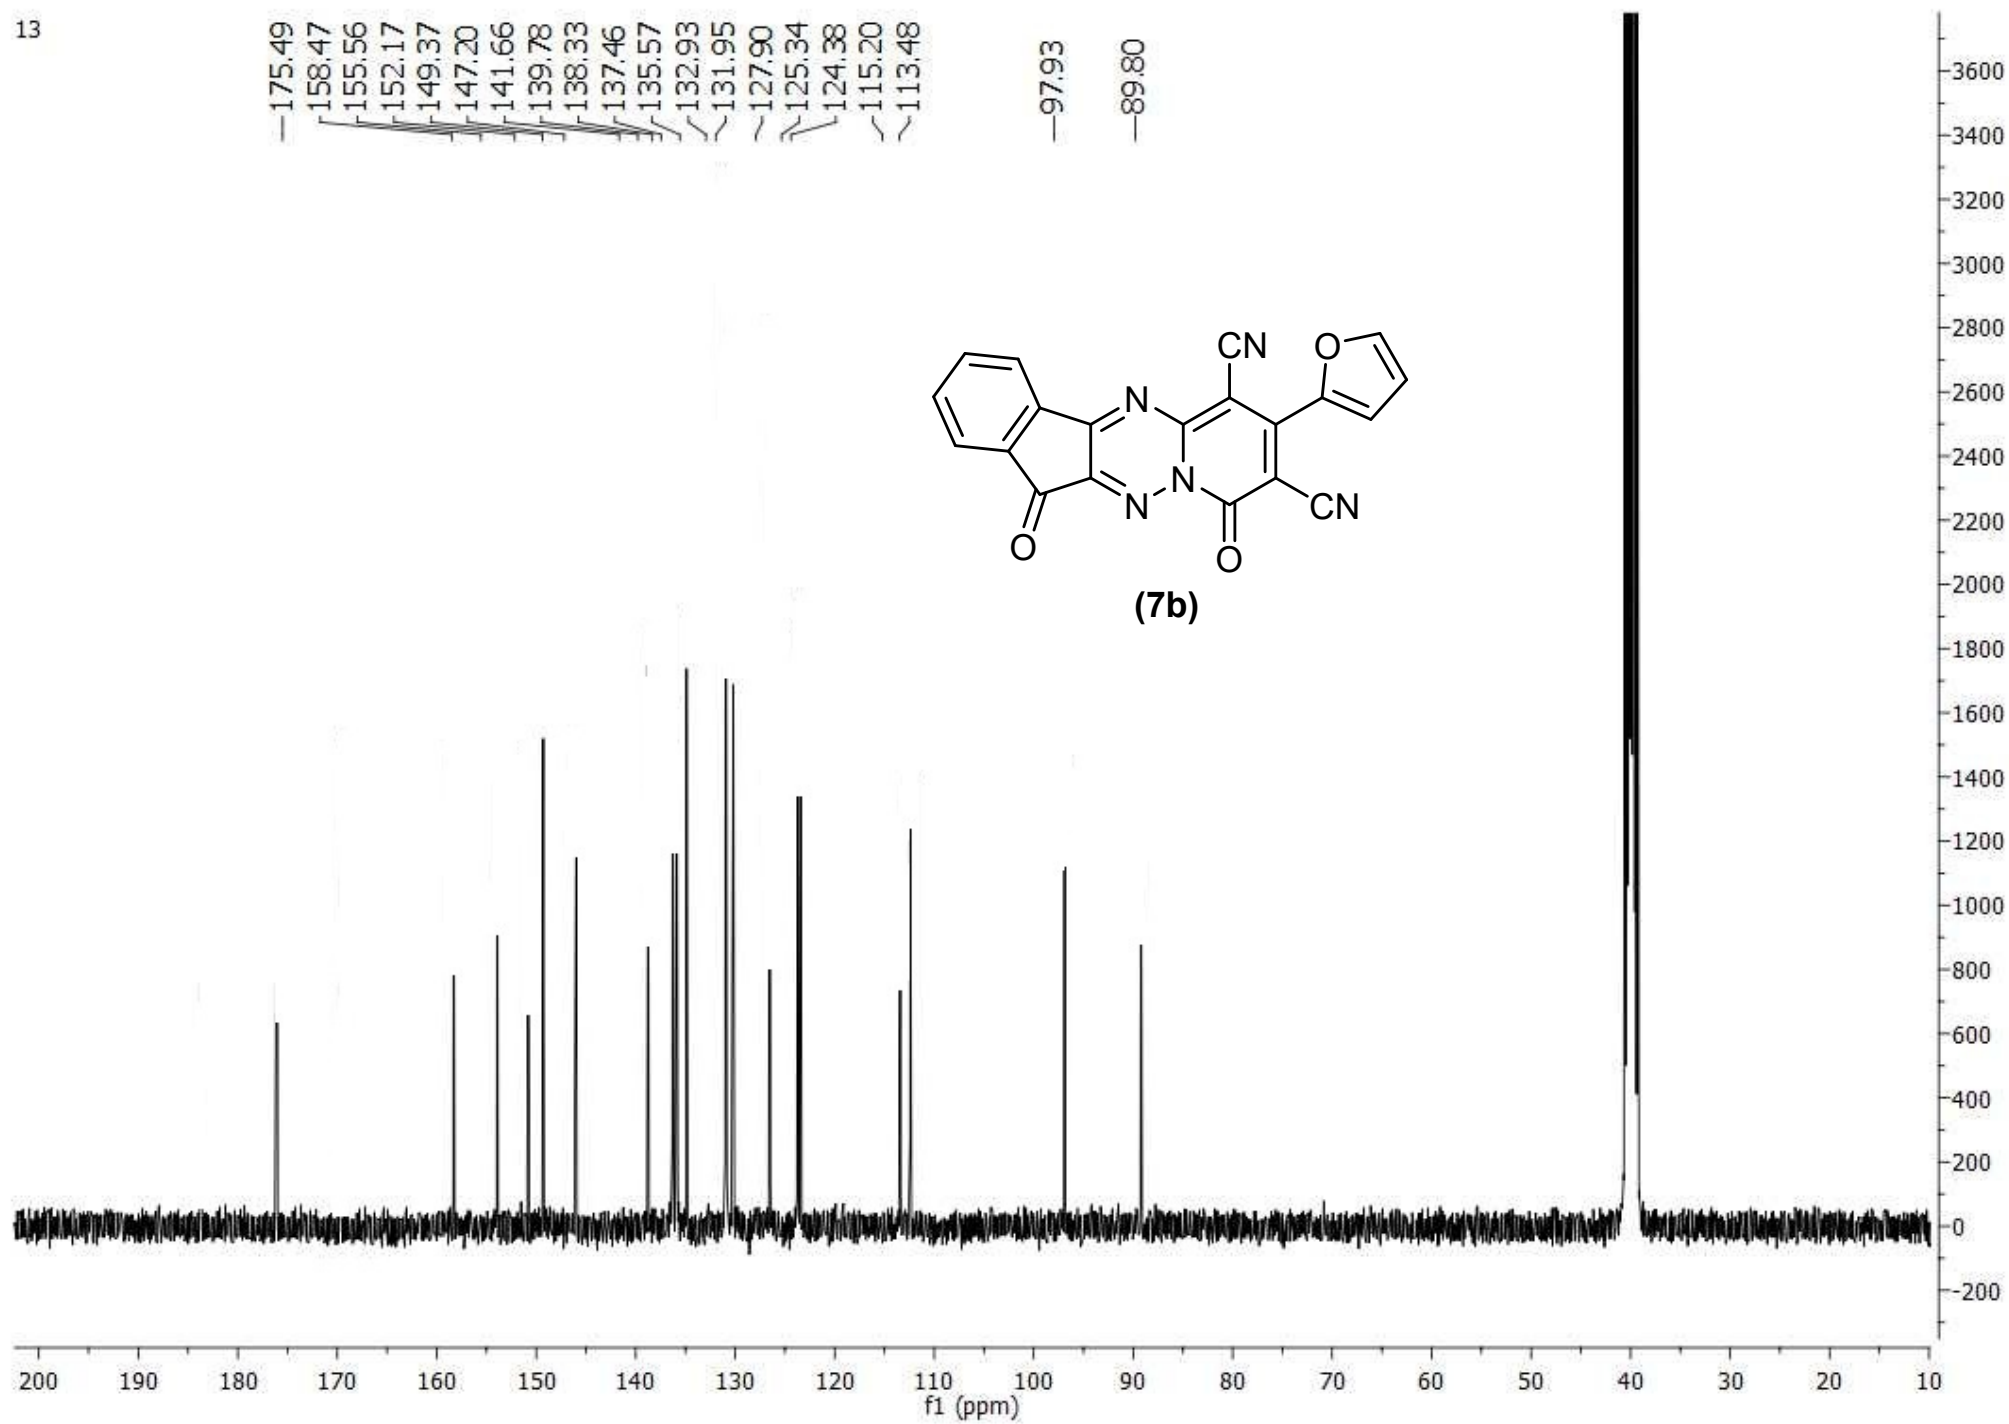

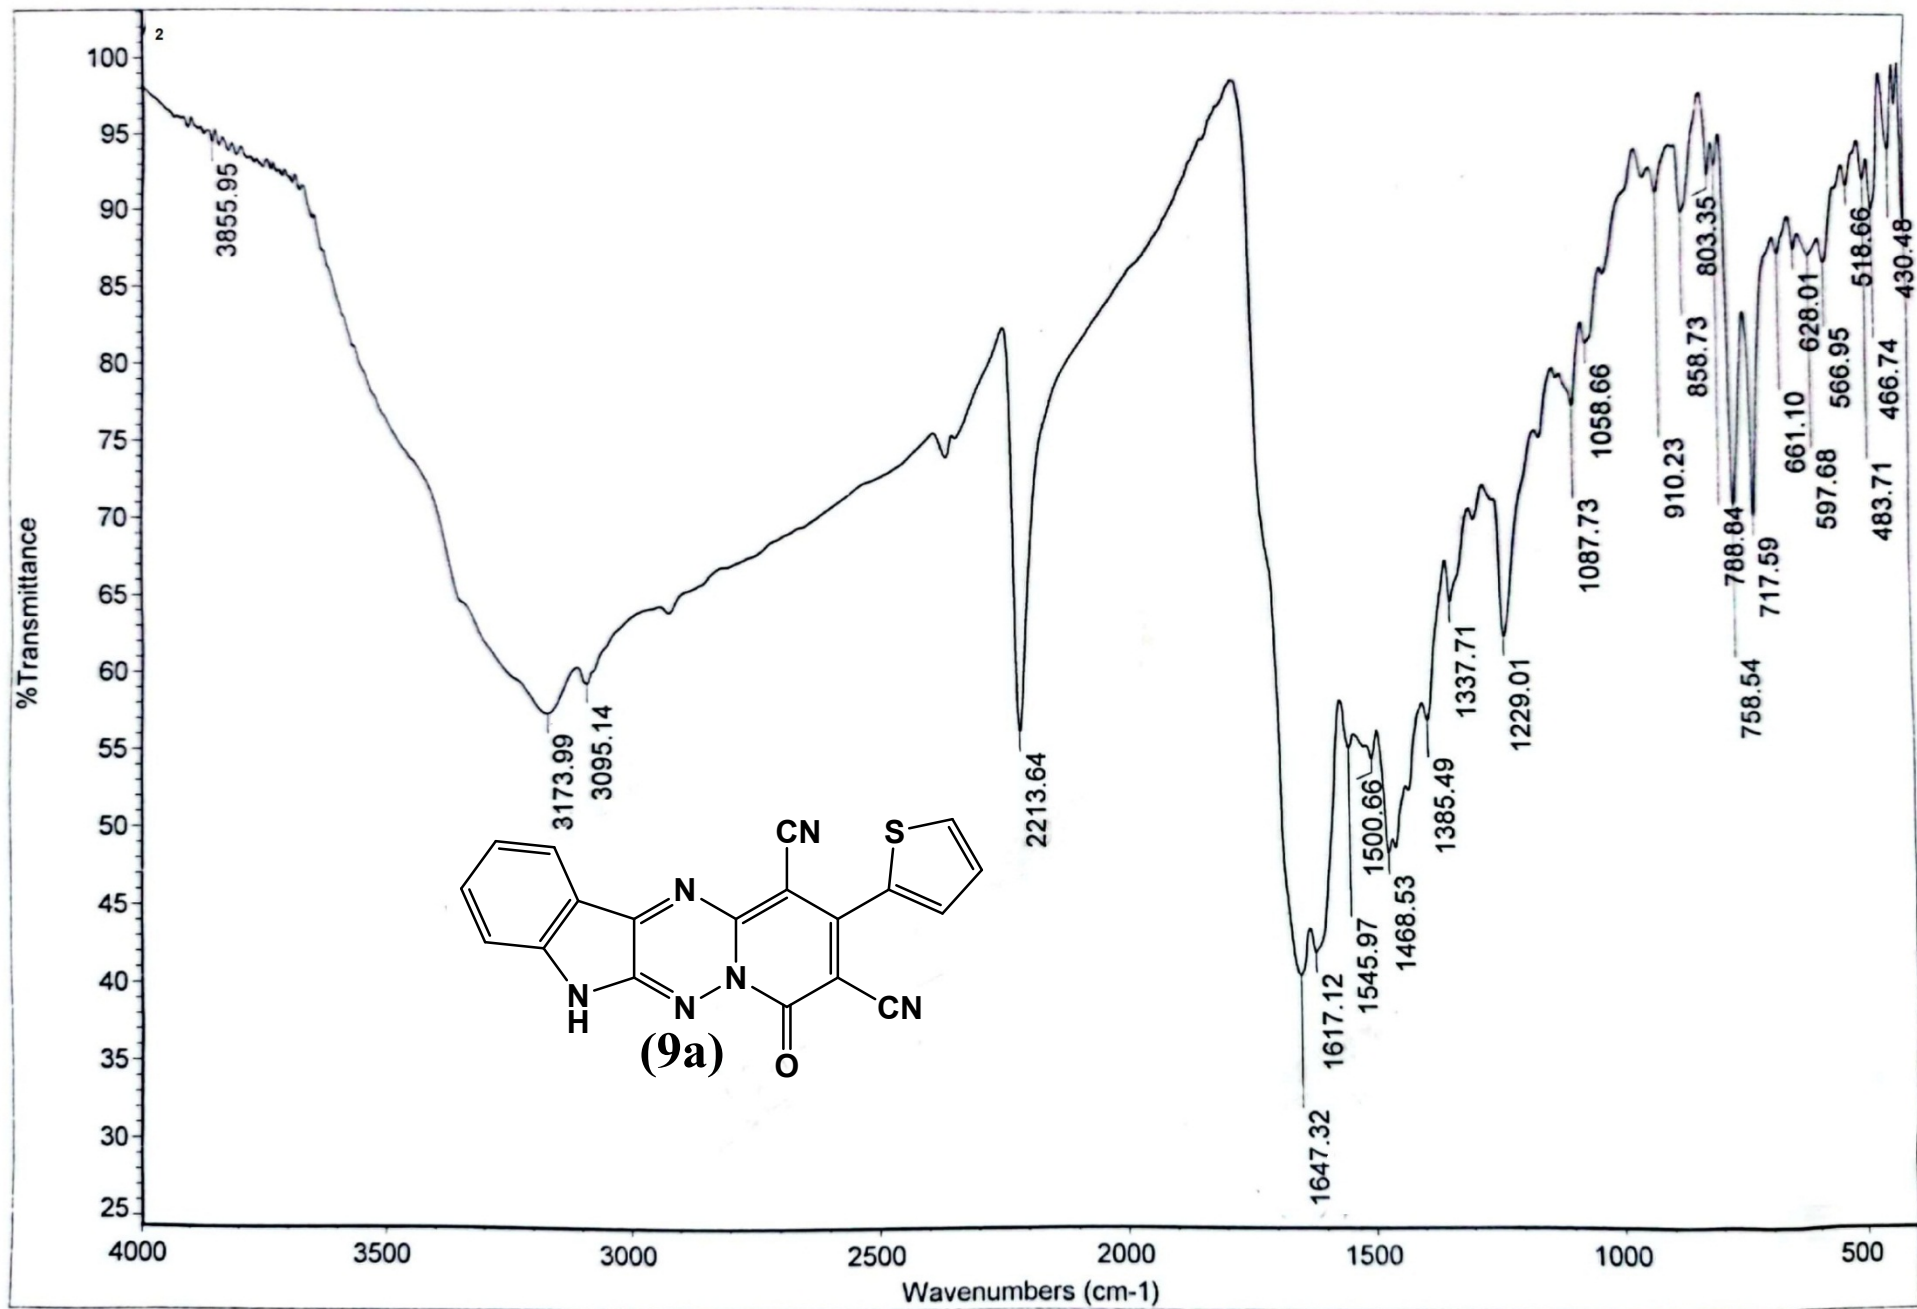

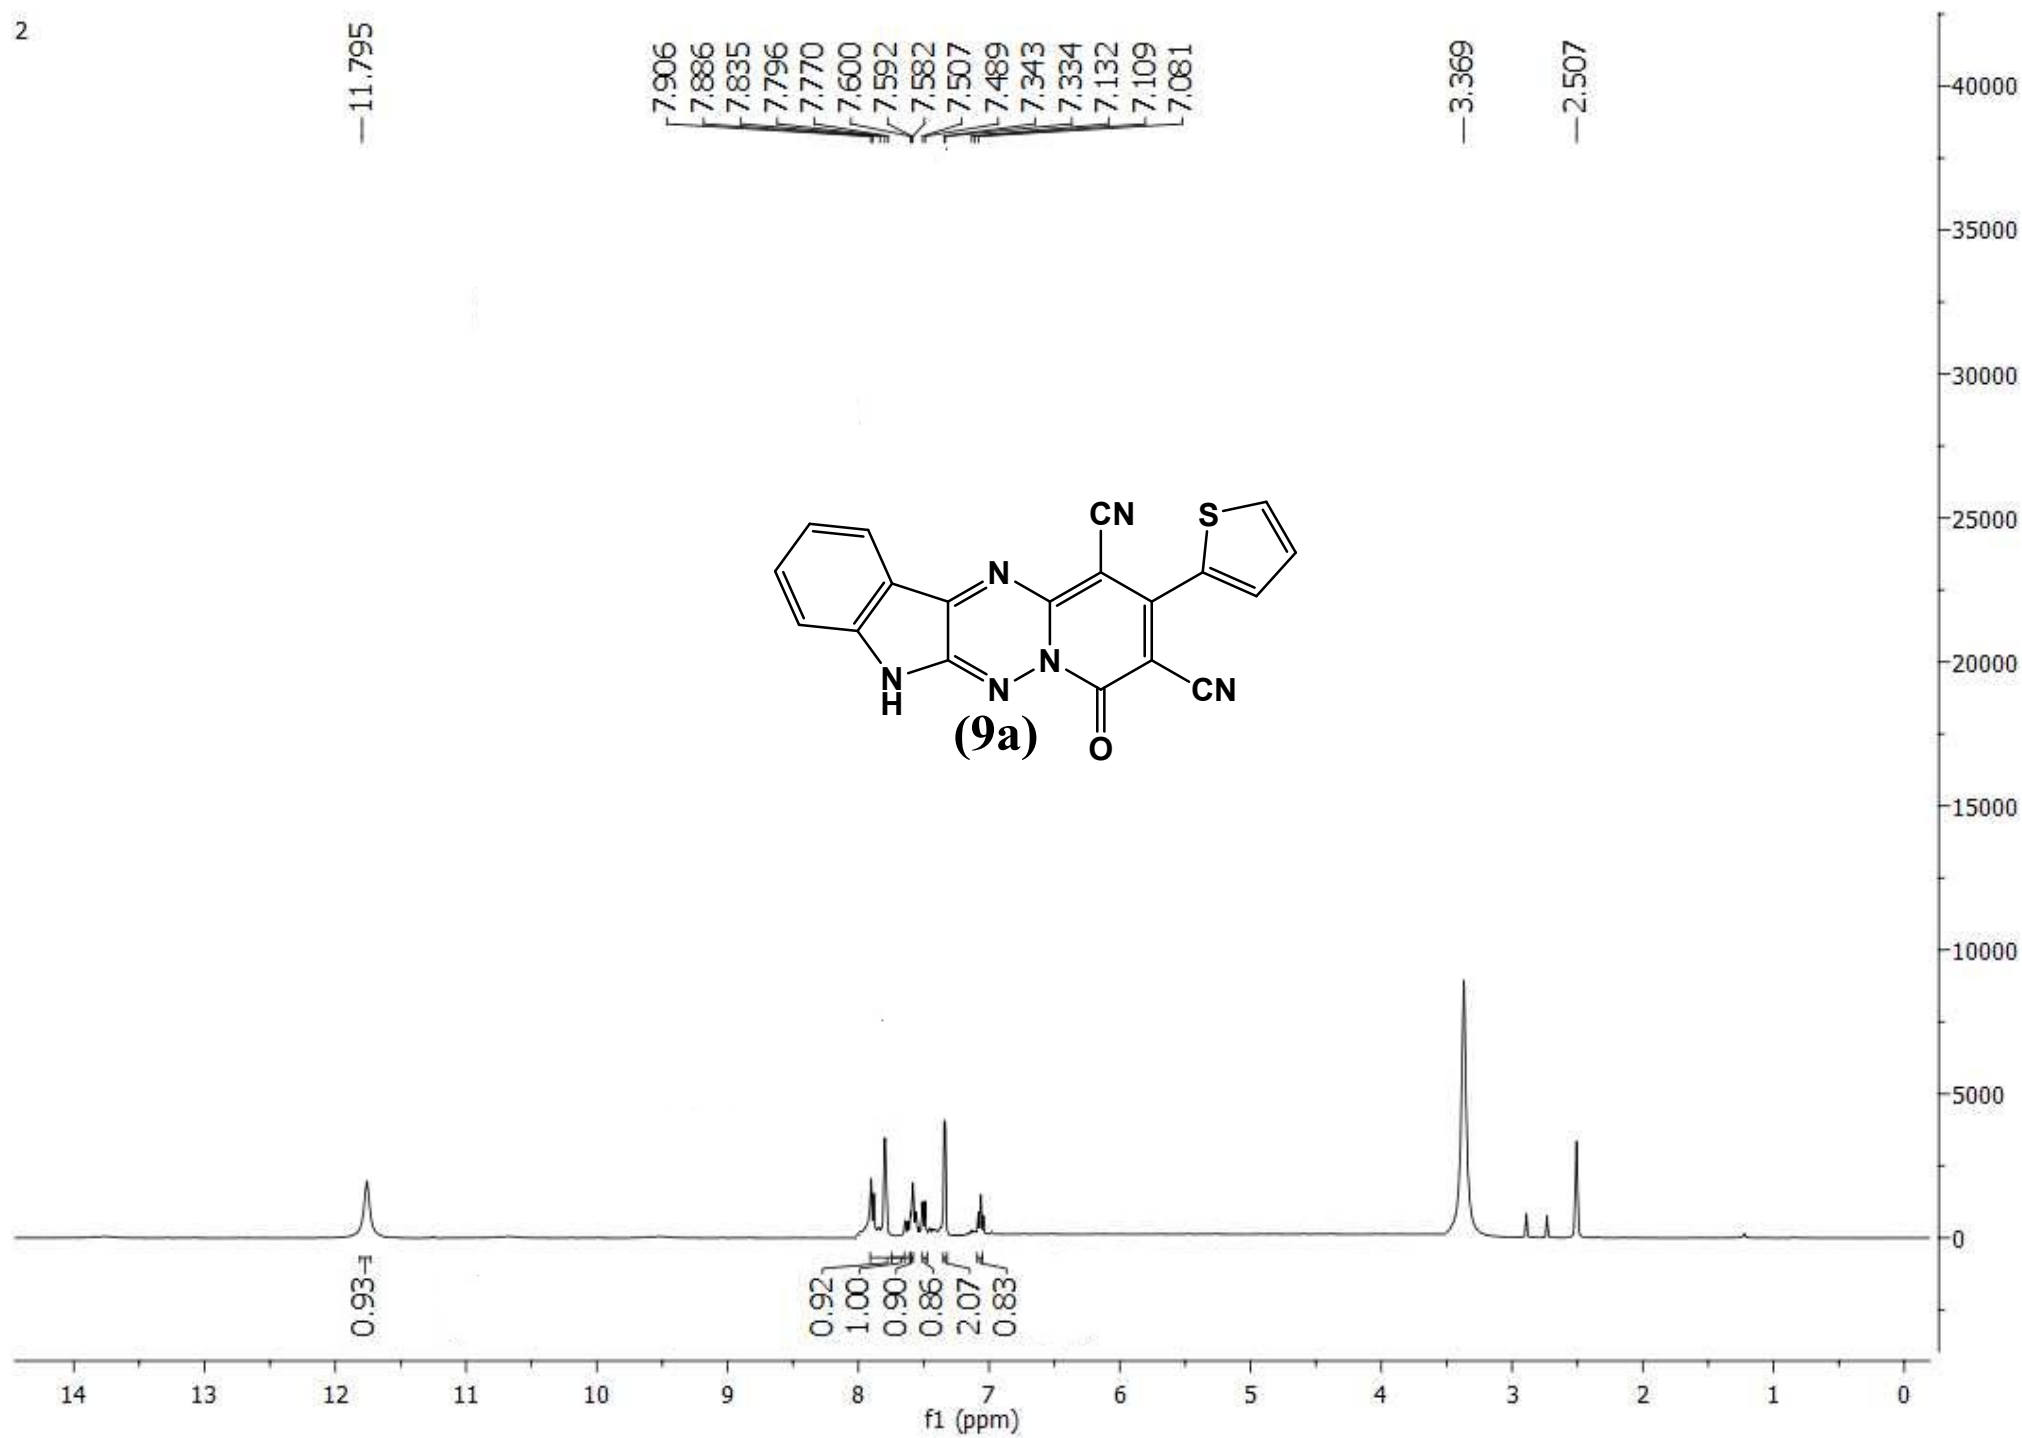

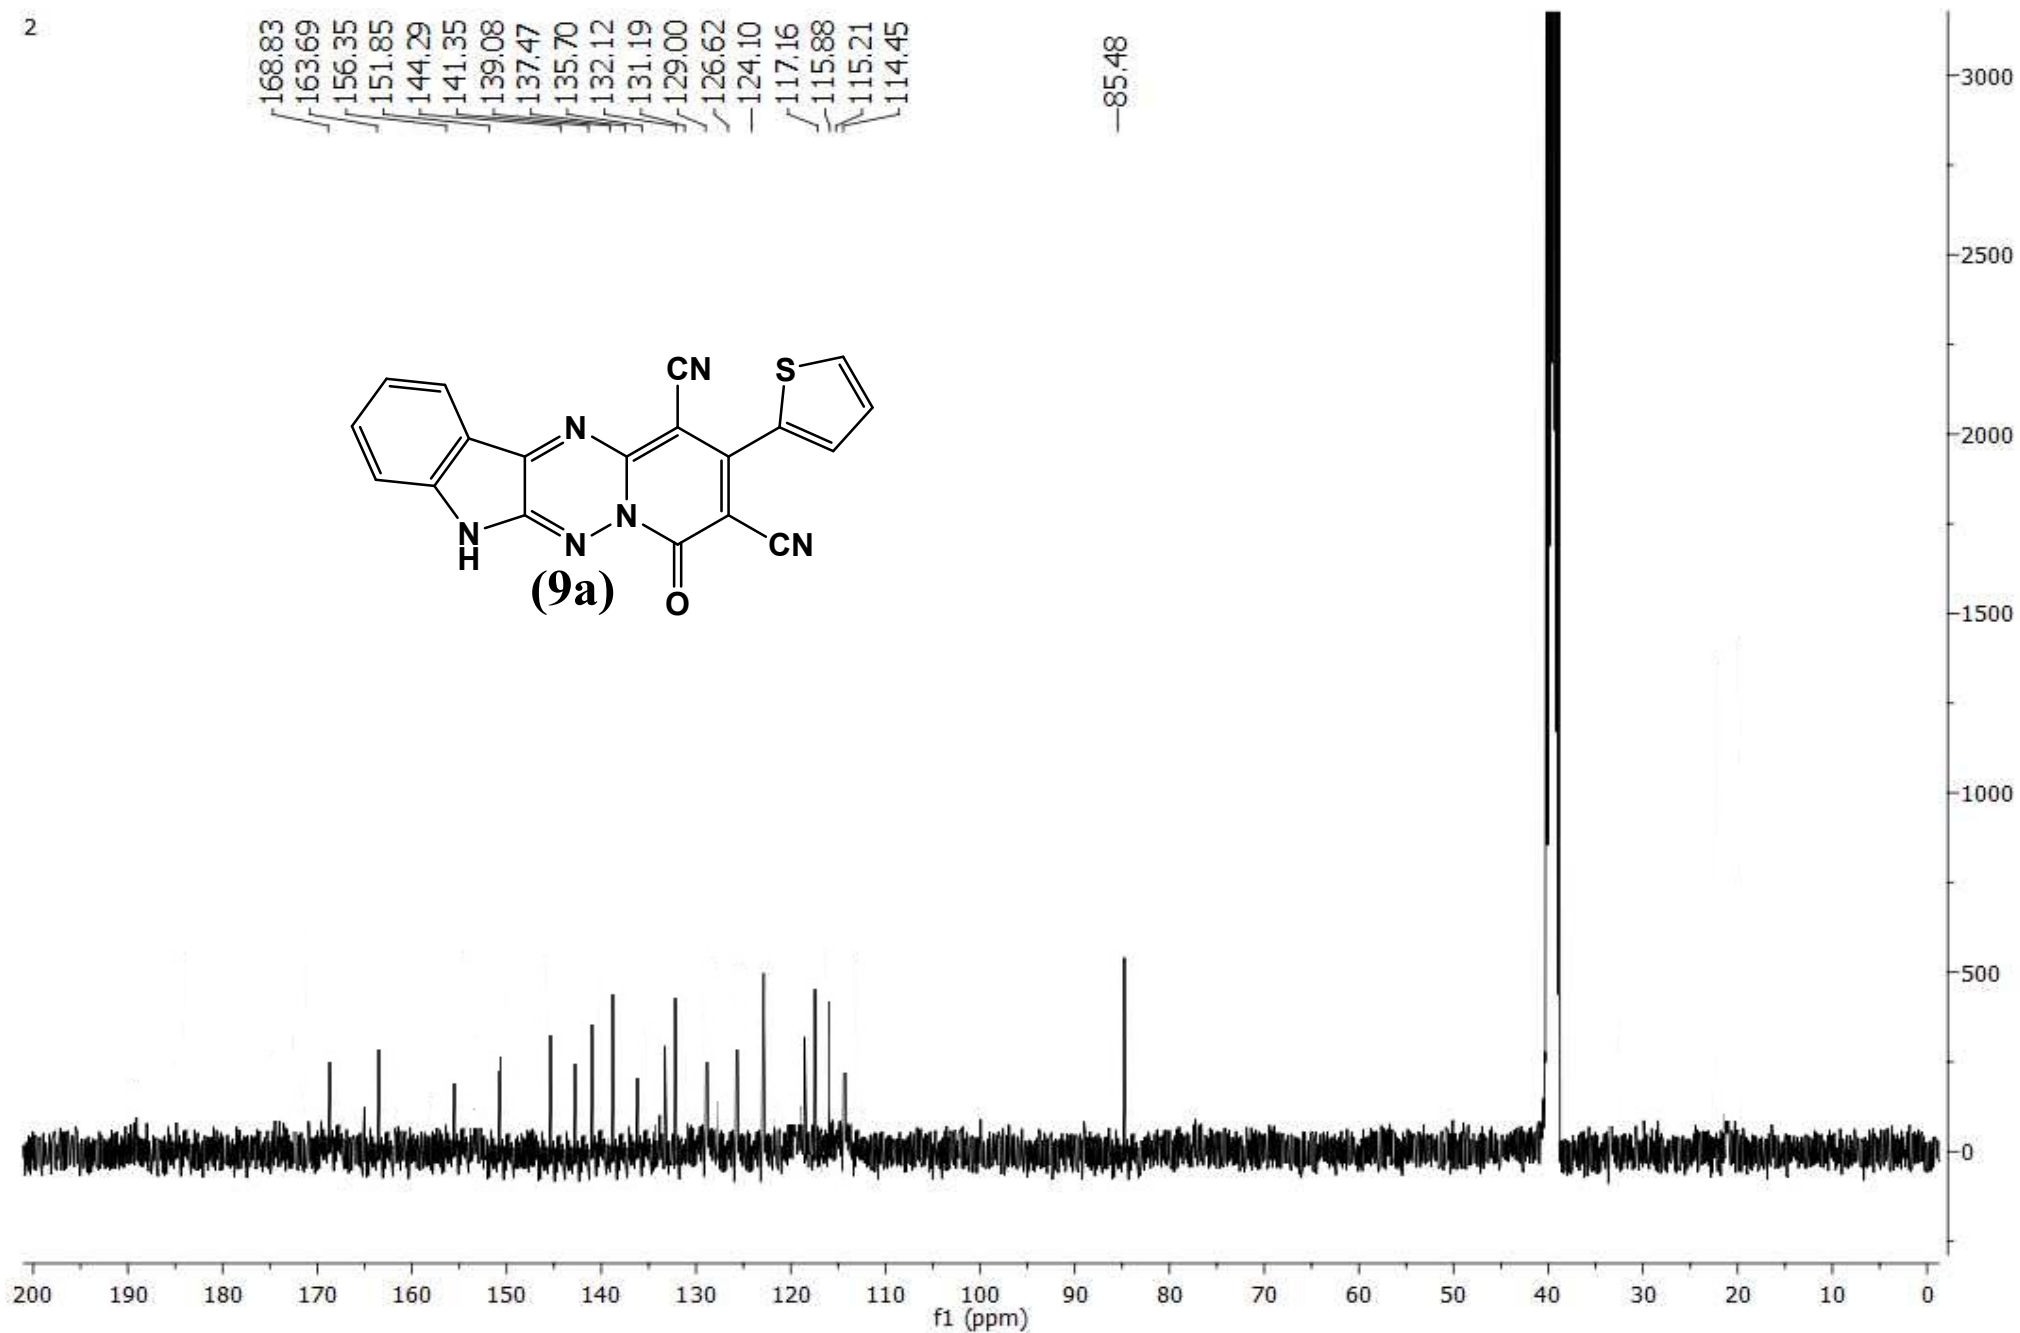



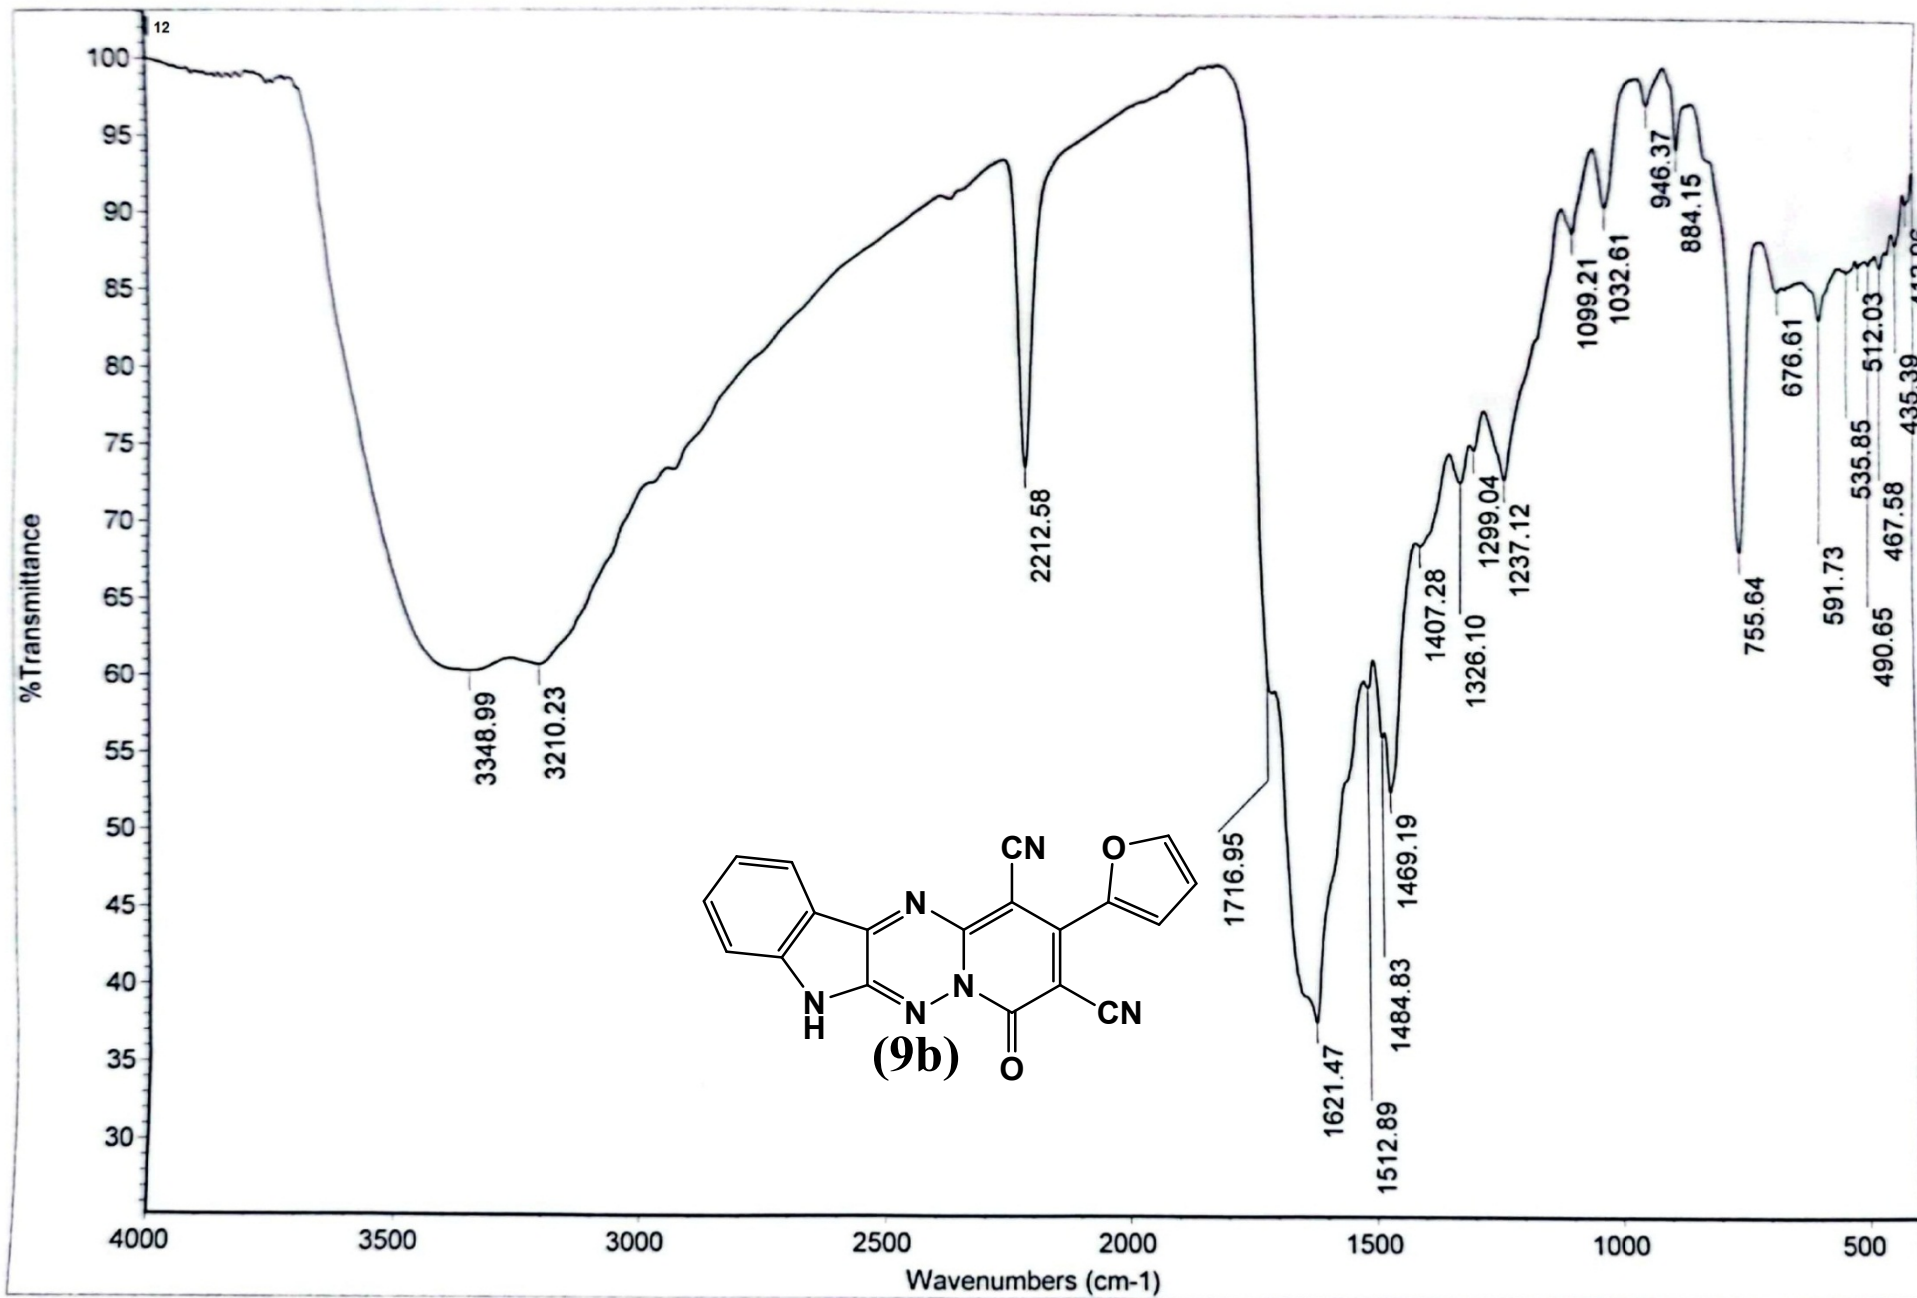

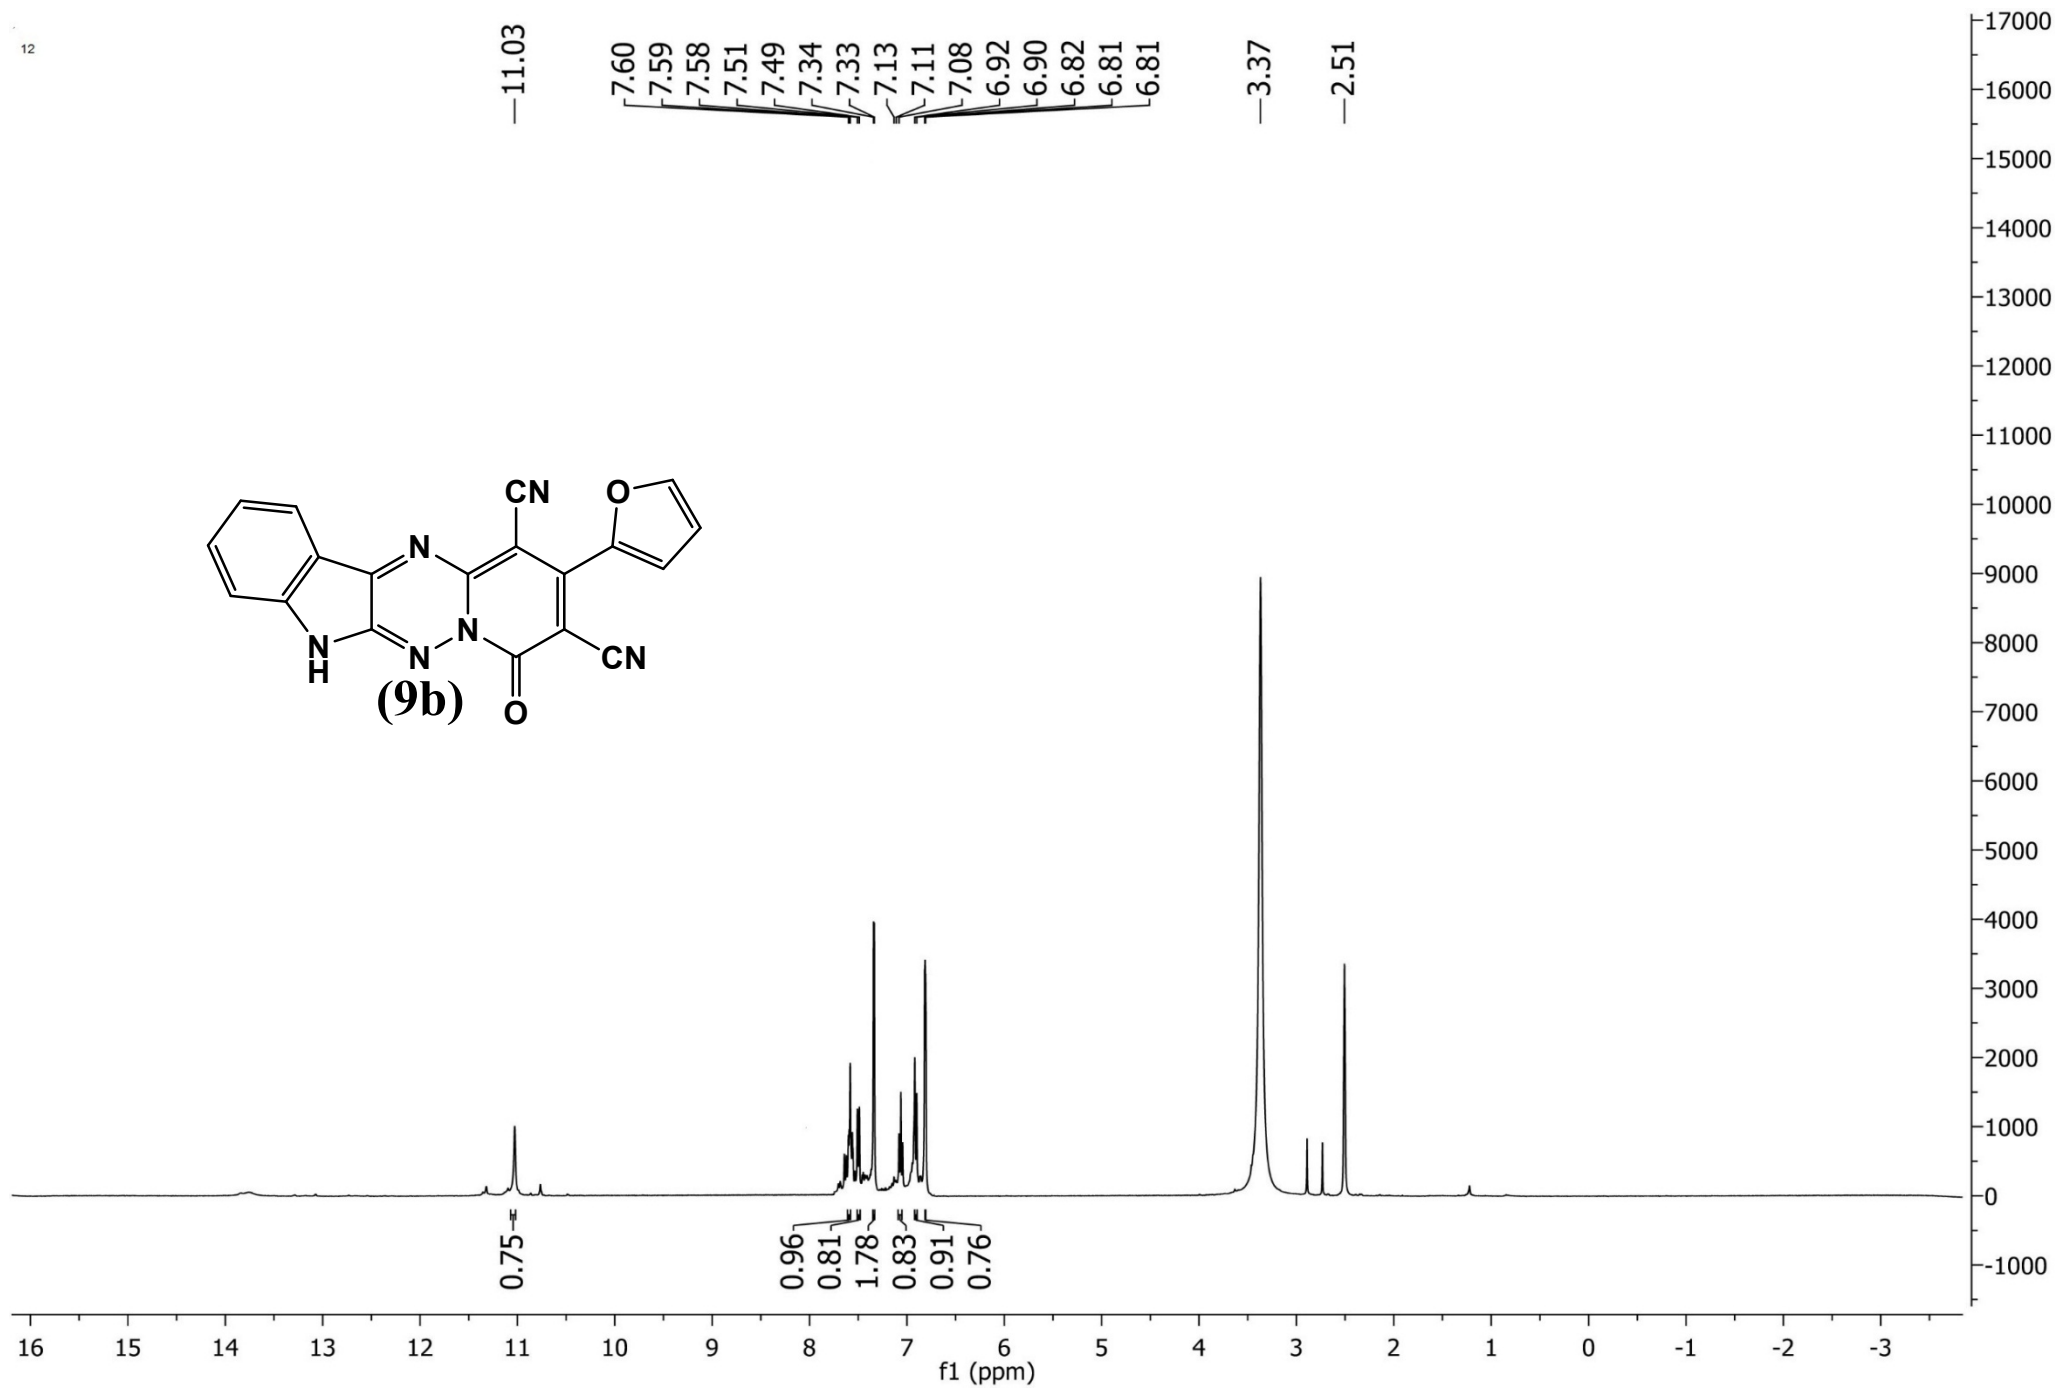

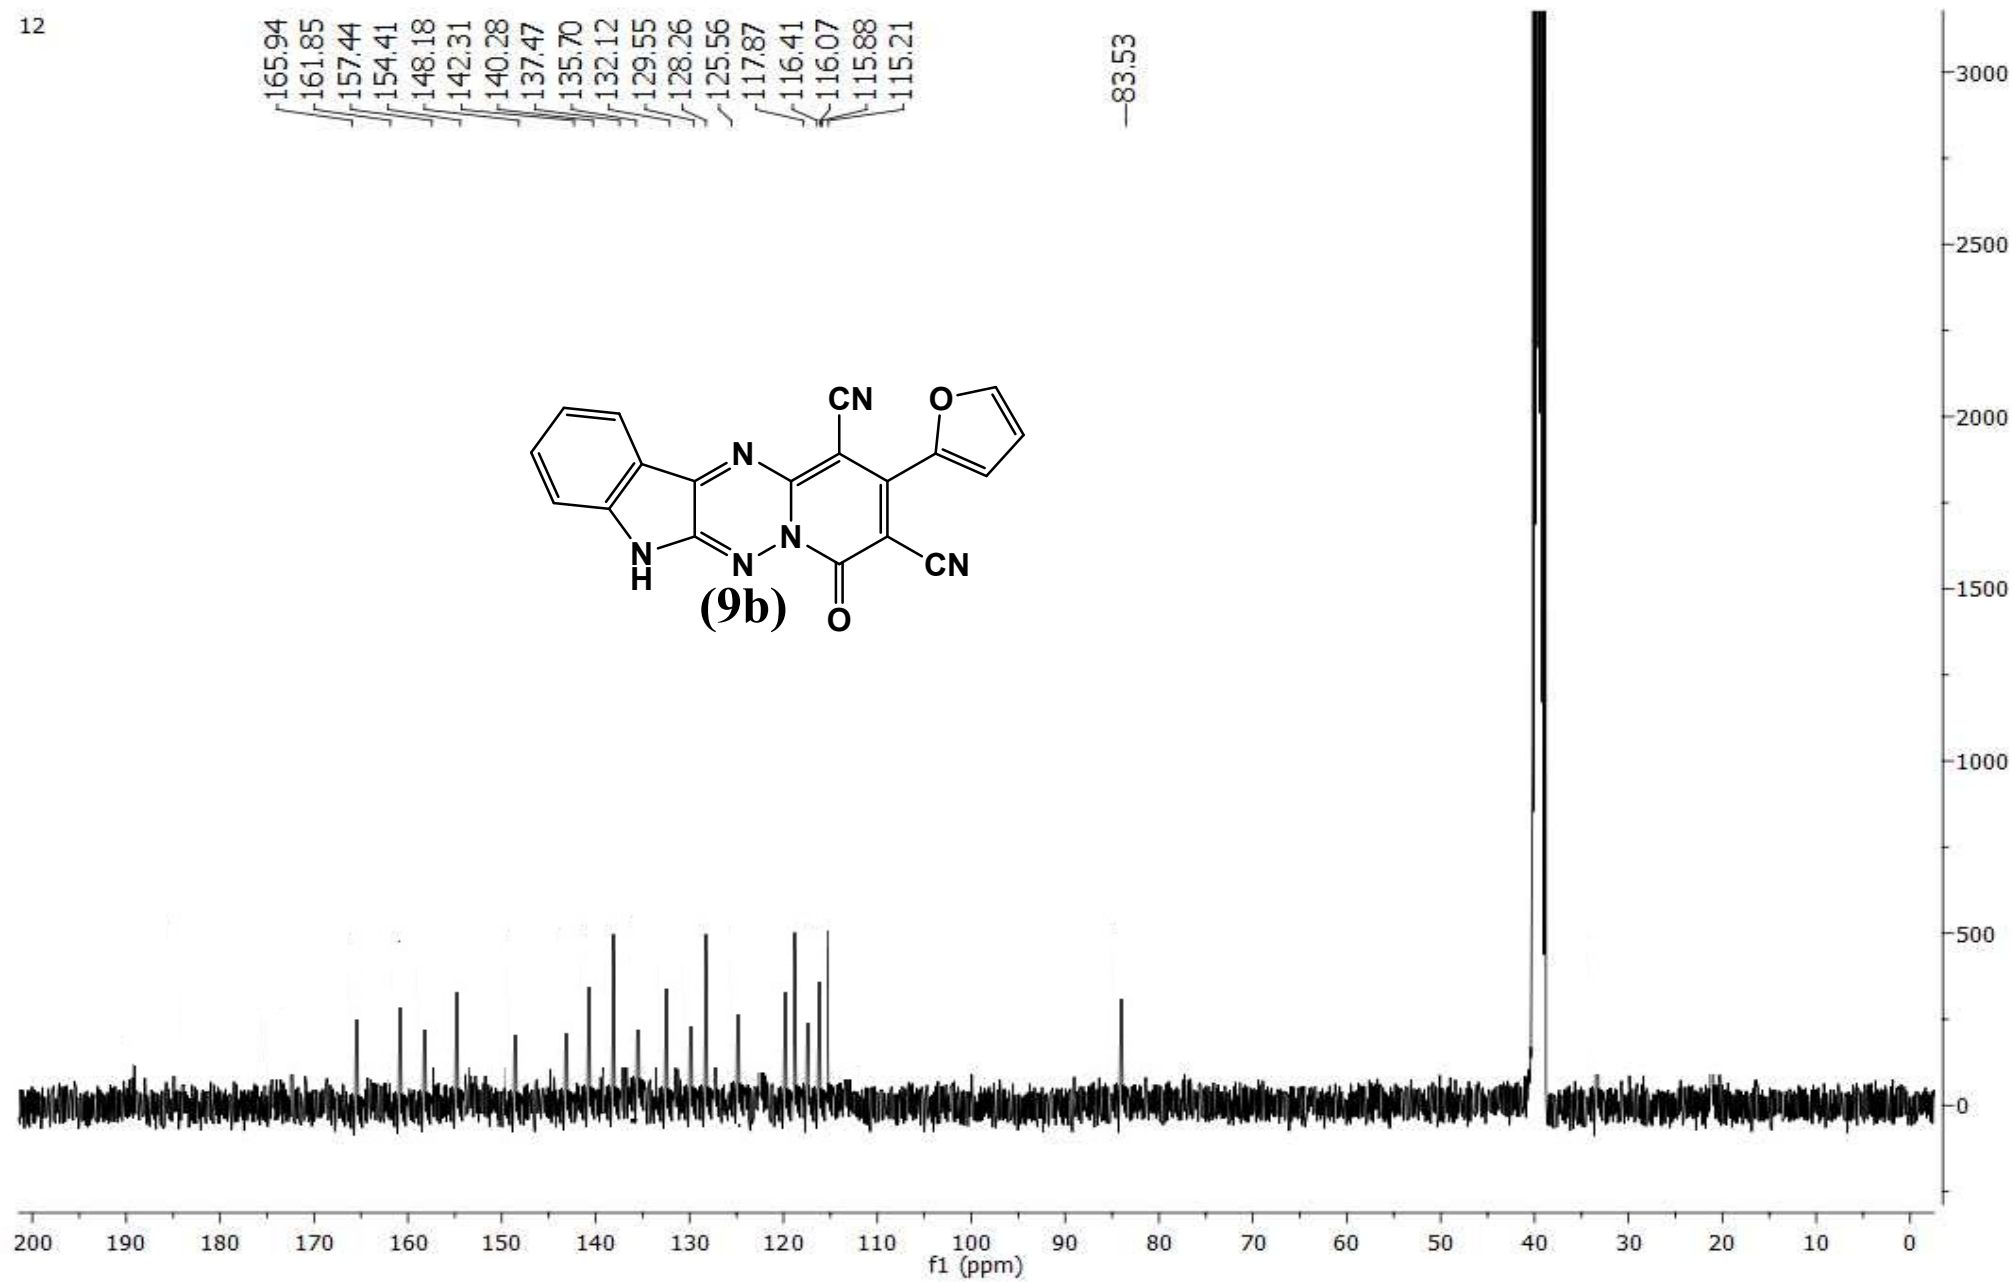

**Table (s1): The raw data of inhibition zone diameters mean  $\pm$  SD expressed by (mm) of all synthesized derivatives 2a-9b against different pathogenic microorganisms**

| Comp. no. | Gram +ve  |         | Gram -ve           |         |                        |         | Fungi   |
|-----------|-----------|---------|--------------------|---------|------------------------|---------|---------|
|           |           |         | Enterobacteriaceae |         | Non-Enterobacteriaceae |         |         |
|           | MS        | MR      | EC                 | K       | PS                     | AC      | C       |
| 2a        | 18        | 13      | 13                 | 25      | 18                     | 22      | 16      |
|           | 19        | 13      | 13                 | 26      | 19                     | 22      | 17      |
|           | 18        | 14      | 14                 | 25      | 18                     | 23      | 16      |
| Mean      | 18.3      | 13.4    | 13.3               | 25.3    | 18.3                   | 22.3    | 16.3    |
| SD        | 0.5773503 | 0.57735 | 0.57735            | 0.57735 | 0.57735                | 0.57735 | 0.57735 |
| 2b        | 16        | 13      | 17                 | 21      | 18                     | 22      | 18      |
|           | 16        | 13      | 17                 | 21      | 18                     | 23      | 19      |
|           | 17        | 14      | 18                 | 22      | 19                     | 23      | 18      |
| Mean      | 16.3      | 13.3    | 17.3               | 21.3    | 18.3                   | 22.6    | 18.3    |
| SD        | 0.5773503 | 0.57735 | 0.57735            | 0.57735 | 0.57735                | 0.57735 | 0.57735 |
| 3a        | 20        | 15      | 15                 | 20      | 20                     | 20      | 16      |
|           | 21        | 16      | 15                 | 21      | 20                     | 21      | 17      |
|           | 20        | 15      | 16                 | 20      | 21                     | 20      | 16      |
| Mean      | 20.3      | 15.3    | 15.3               | 20.3    | 20.3                   | 20.3    | 16.3    |
| SD        | 0.5773503 | 0.57735 | 0.57735            | 0.57735 | 0.57735                | 0.57735 | 0.57735 |
| 3b        | 23        | 20      | 16                 | 20      | 18                     | 20      | 14      |
|           | 24        | 21      | 17                 | 20      | 18                     | 21      | 14      |
|           | 23        | 20      | 17                 | 21      | 19                     | 22      | 15      |
| Mean      | 23.3      | 20.3    | 16.7               | 20.3    | 18.3                   | 21      | 14.3    |
| SD        | 0.5773503 | 0.57735 | 0.57735            | 0.57735 | 0.57735                | 1       | 0.57735 |
| 4a        | 15        | 15      | 17                 | 20      | 18                     | 23      | 17      |
|           | 15        | 15      | 17                 | 21      | 18                     | 23      | 16      |
|           | 16        | 16      | 18                 | 20      | 19                     | 24      | 17      |
| Mean      | 15.3      | 15.3    | 17.3               | 20.3    | 18.3                   | 23.3    | 16.6    |
| SD        | 0.5773503 | 0.57735 | 0.57735            | 0.57735 | 0.57735                | 0.57735 | 0.57735 |
| 4b        | 20        | 16      | 17                 | 20      | 15                     | 20      | 12      |
|           | 21        | 17      | 18                 | 21      | 16                     | 21      | 13      |
|           | 20        | 16      | 18                 | 20      | 15                     | 20      | 14      |
| Mean      | 20.3      | 16.3    | 17.6               | 20.3    | 15.3                   | 20.3    | 13      |

|      |           |            |           |         |           |           |           |
|------|-----------|------------|-----------|---------|-----------|-----------|-----------|
| SD   | 0.5773503 | 0.57735    | 0.57735   | 0.57735 | 0.57735   | 0.57735   | 1         |
| 5a   | 18        | 14         | 17        | 20      | 15        | 20        | 15        |
|      | 18        | 15         | 18        | 21      | 16        | 21        | 15        |
|      | 19        | 14         | 17        | 20      | 15        | 22        | 16        |
| Mean | 18.3      | 14.3       | 17.3      | 20.3    | 15.3      | 21        | 15.3      |
| SD   | 0.5773503 | 0.57735    | 0.57735   | 0.57735 | 0.57735   | 1         | 0.57735   |
| 5b   | 18        | 16         | 17        | 22      | 16        | 20        | 15        |
|      | 18        | 17         | 17        | 23      | 16        | 21        | 16        |
|      | 19        | 16         | 16        | 22      | 17        | 22        | 15        |
| Mean | 18.3      | 16.3       | 16.6      | 22.3    | 16.3      | 21        | 15.3      |
| SD   | 0.5773503 | 0.57735    | 0.57735   | 0.57735 | 0.57735   | 1         | 0.57735   |
| 6a   | 18        | 18         | 17        | 20      | 17        | 30        | 15        |
|      | 19        | 19         | 18        | 20      | 18        | 31        | 16        |
|      | 18        | 18         | 17        | 21      | 17        | 30        | 15        |
| Mean | 18.3      | 18.3       | 17.3      | 20.3    | 17.3      | 30.3      | 15.3      |
| SD   | 0.5773503 | 0.57735    | 0.57735   | 0.57735 | 0.57735   | 0.57735   | 0.57735   |
| 6b   | 17        | 16         | 18        | 20      | 18        | 15        | 15        |
|      | 18        | 17         | 18        | 20      | 18        | 16        | 16        |
|      | 17        | 16         | 19        | 21      | 19        | 17        | 16        |
| Mean | 17.3      | 16.3       | 18.3      | 20.3    | 18.3      | 16        | 15.6      |
| SD   | 0.5773503 | 0.57735    | 0.57735   | 0.57735 | 0.57735   | 1         | 0.57735   |
| 7a   | 20        | 17         | 14        | 20      | 12        | 26        | 15        |
|      | 20        | 18         | 15        | 18      | 13        | 27        | 15        |
|      | 21        | 17         | 15        | 19      | 12        | 26        | 16        |
| Mean | 20.3      | 17.3       | 14.6      | 19      | 12.3      | 26.3      | 15.3      |
| SD   | 0.5773503 | 0.57735    | 0.57735   | 1       | 0.57735   | 0.57735   | 0.57735   |
| SE   | 0.3333333 | 0.3333333  | 0.3333333 | 0.57735 | 0.3333333 | 0.3333333 | 0.3333333 |
| 7b   | 15        | NO<br>ZONE | 15        | 20      | 15        | 25        | 12        |
|      | 15        |            | 15        | 20      | 16        | 26        | 13        |
|      | 16        |            | 16        | 21      | 17        | 25        | 14        |
| Mean | 15.3      |            | 15.3      | 20.3    | 16        | 25.3      | 13        |
| SD   | 0.5773503 |            | 0.57735   | 0.57735 | 1         | 0.57735   | 1         |
| 8a   | 20        | 15         | 15        | 18      | 15        | 23        | 15        |
|      | 21        | 16         | 15        | 18      | 15        | 23        | 16        |
|      | 20        | 15         | 16        | 19      | 16        | 24        | 15        |
| Mean | 20.3      | 15.3       | 15.3      | 18.3    | 15.3      | 23.3      | 15.3      |



**Table S2: Percentage of inhibitory effect of different MICs of synthesized compounds on biofilm formation in various microorganisms:**

|           | Methicillin resistant<br><i>S. aureus</i> |           |           | <i>E. coli</i> |           |            | <i>P. aeruginosa</i> |           |           | <i>C. albicans</i> |           |             |
|-----------|-------------------------------------------|-----------|-----------|----------------|-----------|------------|----------------------|-----------|-----------|--------------------|-----------|-------------|
|           | ½ MIC                                     | ¼ MIC     | 1/8 MIC   | ½ MIC          | ¼ MIC     | 1/8 MIC    | ½ MIC                | ¼ MIC     | 1/8 MIC   | ½ MIC              | ¼ MIC     | 1/8 MIC     |
| <b>6b</b> | 74.1±0.45                                 | 71.3±0.5  | 61±0.9    | 68.2±1.3       | 65.7±0.9  | 63.8±1.6   | 57.6±1.7             | 50.9±2.5  | 45.4±1.3  | 76.9±0.2           | 76.1±0.45 | 75±0.51     |
| <b>3a</b> | 74.6±0.5                                  | 70.8±0.45 | 61.5±0.45 | 69.9±0.45      | 66.2±0.45 | 63.8±0.45  | 35.9±2.51            | 10±0.90   | 0.7±0.45  | 76.7±0.51          | 67.8±1.32 | 55.1±2.77   |
| <b>2a</b> | 71.3±0.5                                  | 45±0.45   | 27.6±8.79 | 67.9±0.70      | 56.1±0.70 | 46.2±0.95  | 78.4±1.04            | 77.6±0.55 | 1.6±2.23  | 75.6±0.46          | 74.4±0.9  | 17.6±0.92   |
| <b>3b</b> | 70.2±0.72                                 | 68.3±0.79 | 59.9±2.60 | 52.3±1.65      | 43.5±0.45 | 43±0.9     | 74.9±0.70            | 47.1±1.48 | 10.1±3.32 | 62.7±1.89          | 29.4±1.53 | 20.7±0.85   |
| <b>2b</b> | 73.7±1.20                                 | 68.8±0.72 | 64.7±1.85 | 65.1±0.70      | 64.6±0.72 | 63.2±0.288 | 72.5±1.53            | 37.6±2.85 | 3.1±2.41  | 75.6±1.32          | 66.5±0.61 | 29.7±1.50   |
| <b>8a</b> | 71.8±0.5                                  | 69.1±0.70 | 55.5±1.86 | 52.3±1.26      | 38.2±0.66 | 10.3±2.36  | 81.2±0.70            | 82.9±1.15 | 26.5±5.08 | 70.1±1.17          | 47.3±1.33 | 15.152±5.26 |

**Table S3: effect of 1/8 MIC comp. on expression lasR gene that control the QS in *P. aeruginosa***

|                                              |             | Ct of lasR gene | Ct of housekeeping gene | $\Delta$ Ct | $\Delta\Delta$ Ct | $2^{-\Delta\Delta$ Ct} |
|----------------------------------------------|-------------|-----------------|-------------------------|-------------|-------------------|------------------------|
| <b>lasR gene expression before treatment</b> | control     | 25.6            | 25                      | 0.6         | 0                 | 1                      |
|                                              | <b>2a</b>   | 25.5            | 24.5                    | 1           | 0.4               | 0.8                    |
|                                              | <b>2b</b>   | 25.1            | 24.4                    | 0.7         | 0.1               | 0.9                    |
|                                              | <b>3a</b>   | 25.2            | 24.4                    | 0.8         | 0.2               | 0.9                    |
|                                              | <b>3b</b>   | 25.4            | 24.6                    | 0.8         | 0.2               | 0.9                    |
|                                              | <b>6a</b>   | 25.7            | 24.7                    | 1           | 0.4               | 0.8                    |
|                                              | <b>6b</b>   | 25.8            | 24.4                    | 1.4         | 0.8               | 0.6                    |
|                                              | Doxycycline | 26              | 24.1                    | 1.9         | 1.3               | 0.4                    |



**Table S4:** displayed the Cytotoxicity and Viability assay

| ID   | ug/ml | O.D   |       |       | Mean<br>O.D | ±SE      | Viability % | Toxicity %  | IC50<br>± SD     |
|------|-------|-------|-------|-------|-------------|----------|-------------|-------------|------------------|
| vero | ----- | 0.732 | 0.697 | 0.725 | 0.718       | 0.010693 | 100         | 0           | ug               |
| 6b   | 1000  | 0.027 | 0.031 | 0.024 | 0.027333    | 0.002028 | 3.806870938 | 96.19312906 | 207.87 ±<br>5.14 |
|      | 500   | 0.086 | 0.08  | 0.093 | 0.086333    | 0.003756 | 12.02414113 | 87.97585887 |                  |
|      | 250   | 0.217 | 0.243 | 0.229 | 0.229667    | 0.007513 | 31.98700093 | 68.01299907 |                  |
|      | 125   | 0.658 | 0.682 | 0.688 | 0.676       | 0.009165 | 94.15041783 | 5.849582173 |                  |
|      | 62.5  | 0.724 | 0.711 | 0.712 | 0.715667    | 0.004177 | 99.67502321 | 0.324976787 |                  |
|      | 31.25 | 0.713 | 0.72  | 0.694 | 0.709       | 0.007767 | 98.74651811 | 1.253481894 |                  |
| 3a   | 1000  | 0.02  | 0.017 | 0.022 | 0.019667    | 0.001453 | 2.739090065 | 97.26090994 | 344.27 ±<br>3.81 |
|      | 500   | 0.132 | 0.119 | 0.153 | 0.134667    | 0.009905 | 18.75580316 | 81.24419684 |                  |
|      | 250   | 0.463 | 0.46  | 0.482 | 0.468333    | 0.006888 | 65.22748375 | 34.77251625 |                  |
|      | 125   | 0.728 | 0.722 | 0.698 | 0.716       | 0.009165 | 99.72144847 | 0.278551532 |                  |
|      | 62.5  | 0.709 | 0.725 | 0.717 | 0.717       | 0.004619 | 99.86072423 | 0.139275766 |                  |
|      | 31.25 | 0.724 | 0.699 | 0.712 | 0.711667    | 0.007219 | 99.11792015 | 0.882079851 |                  |
| 2a   | 1000  | 0.017 | 0.019 | 0.018 | 0.018       | 0.000577 | 2.506963788 | 97.49303621 | 230.57 ±<br>6.52 |
|      | 500   | 0.138 | 0.174 | 0.155 | 0.155667    | 0.010398 | 21.68059424 | 78.31940576 |                  |
|      | 250   | 0.296 | 0.32  | 0.302 | 0.306       | 0.007211 | 42.6183844  | 57.3816156  |                  |
|      | 125   | 0.684 | 0.702 | 0.673 | 0.686333    | 0.008452 | 95.58960074 | 4.410399257 |                  |
|      | 62.5  | 0.722 | 0.719 | 0.707 | 0.716       | 0.004583 | 99.72144847 | 0.278551532 |                  |
|      | 31.25 | 0.713 | 0.724 | 0.712 | 0.716333    | 0.003844 | 99.76787372 | 0.232126277 |                  |
| 3b   | 1000  | 0.023 | 0.052 | 0.048 | 0.041       | 0.009074 | 5.710306407 | 94.28969359 | 335.3 ±<br>7.95  |
|      | 500   | 0.089 | 0.126 | 0.104 | 0.106333    | 0.010745 | 14.80965645 | 85.19034355 |                  |
|      | 250   | 0.462 | 0.45  | 0.479 | 0.463667    | 0.008413 | 64.57753018 | 35.42246982 |                  |
|      | 125   | 0.713 | 0.719 | 0.722 | 0.718       | 0.002646 | 100         | 0           |                  |
|      | 62.5  | 0.695 | 0.716 | 0.713 | 0.708       | 0.006557 | 98.60724234 | 1.39275766  |                  |

|           |       |       |       |       |          |          |             |             |                  |
|-----------|-------|-------|-------|-------|----------|----------|-------------|-------------|------------------|
|           | 31.25 | 0.727 | 0.711 | 0.716 | 0.718    | 0.004726 | 100         | 0           |                  |
| <b>2b</b> | 1000  | 0.016 | 0.019 | 0.018 | 0.017667 | 0.000882 | 2.460538533 | 97.53946147 | 231.82 ±<br>2.21 |
|           | 500   | 0.096 | 0.074 | 0.068 | 0.079333 | 0.008511 | 11.04921077 | 88.95078923 |                  |
|           | 250   | 0.315 | 0.297 | 0.322 | 0.311333 | 0.007446 | 43.36118849 | 56.63881151 |                  |
|           | 125   | 0.683 | 0.709 | 0.708 | 0.7      | 0.008505 | 97.49303621 | 2.506963788 |                  |
|           | 62.5  | 0.718 | 0.699 | 0.723 | 0.713333 | 0.007311 | 99.35004643 | 0.649953575 |                  |
|           | 31.25 | 0.715 | 0.719 | 0.72  | 0.718    | 0.001528 | 100         | 0           |                  |
| <b>8a</b> | 1000  | 0.022 | 0.017 | 0.02  | 0.019667 | 0.001453 | 2.739090065 | 97.26090994 | 175.17 ±<br>3.49 |
|           | 500   | 0.048 | 0.032 | 0.039 | 0.039667 | 0.004631 | 5.524605385 | 94.47539461 |                  |
|           | 250   | 0.044 | 0.062 | 0.05  | 0.052    | 0.005292 | 7.242339833 | 92.75766017 |                  |
|           | 125   | 0.699 | 0.701 | 0.684 | 0.694667 | 0.005364 | 96.75023213 | 3.249767874 |                  |
|           | 62.5  | 0.674 | 0.699 | 0.703 | 0.692    | 0.009074 | 96.37883008 | 3.621169916 |                  |
|           | 31.25 | 0.722 | 0.714 | 0.705 | 0.713667 | 0.00491  | 99.39647168 | 0.603528319 |                  |

**Figure S1: Effect of different concentrations of the synthesized compound on Vero cells.**

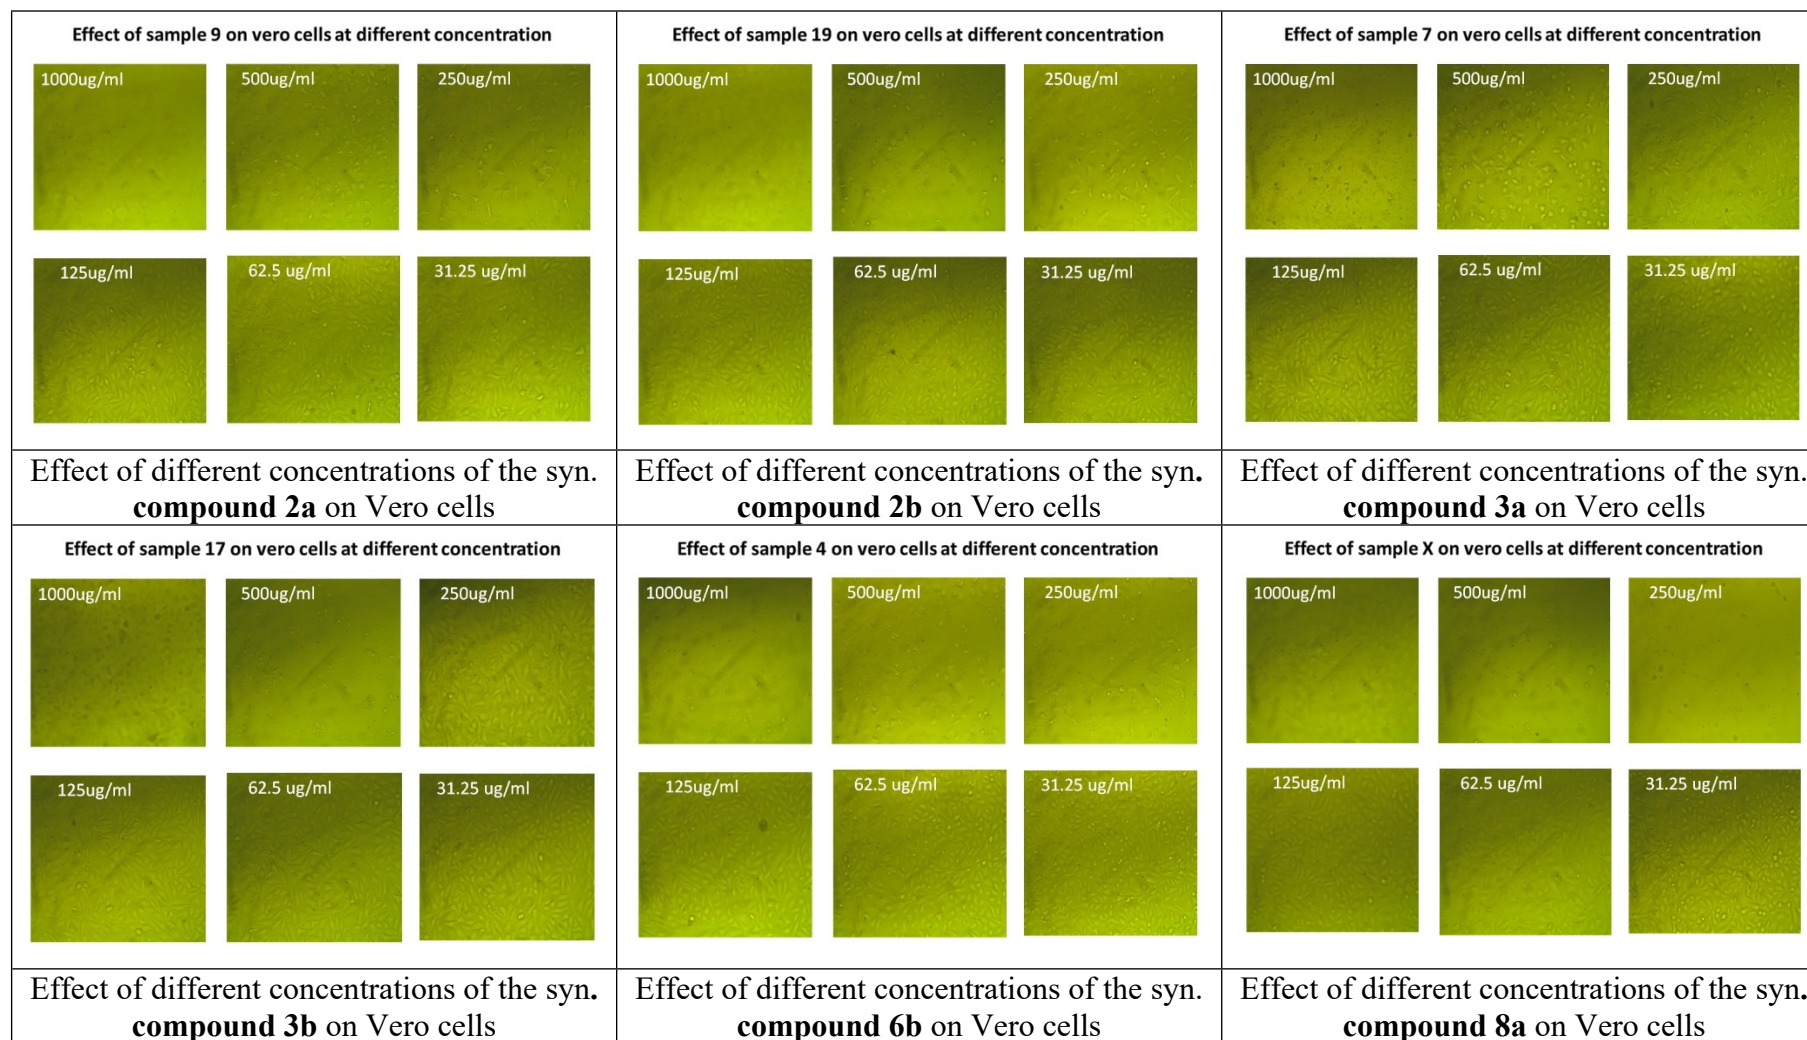

# Docking simulation figures

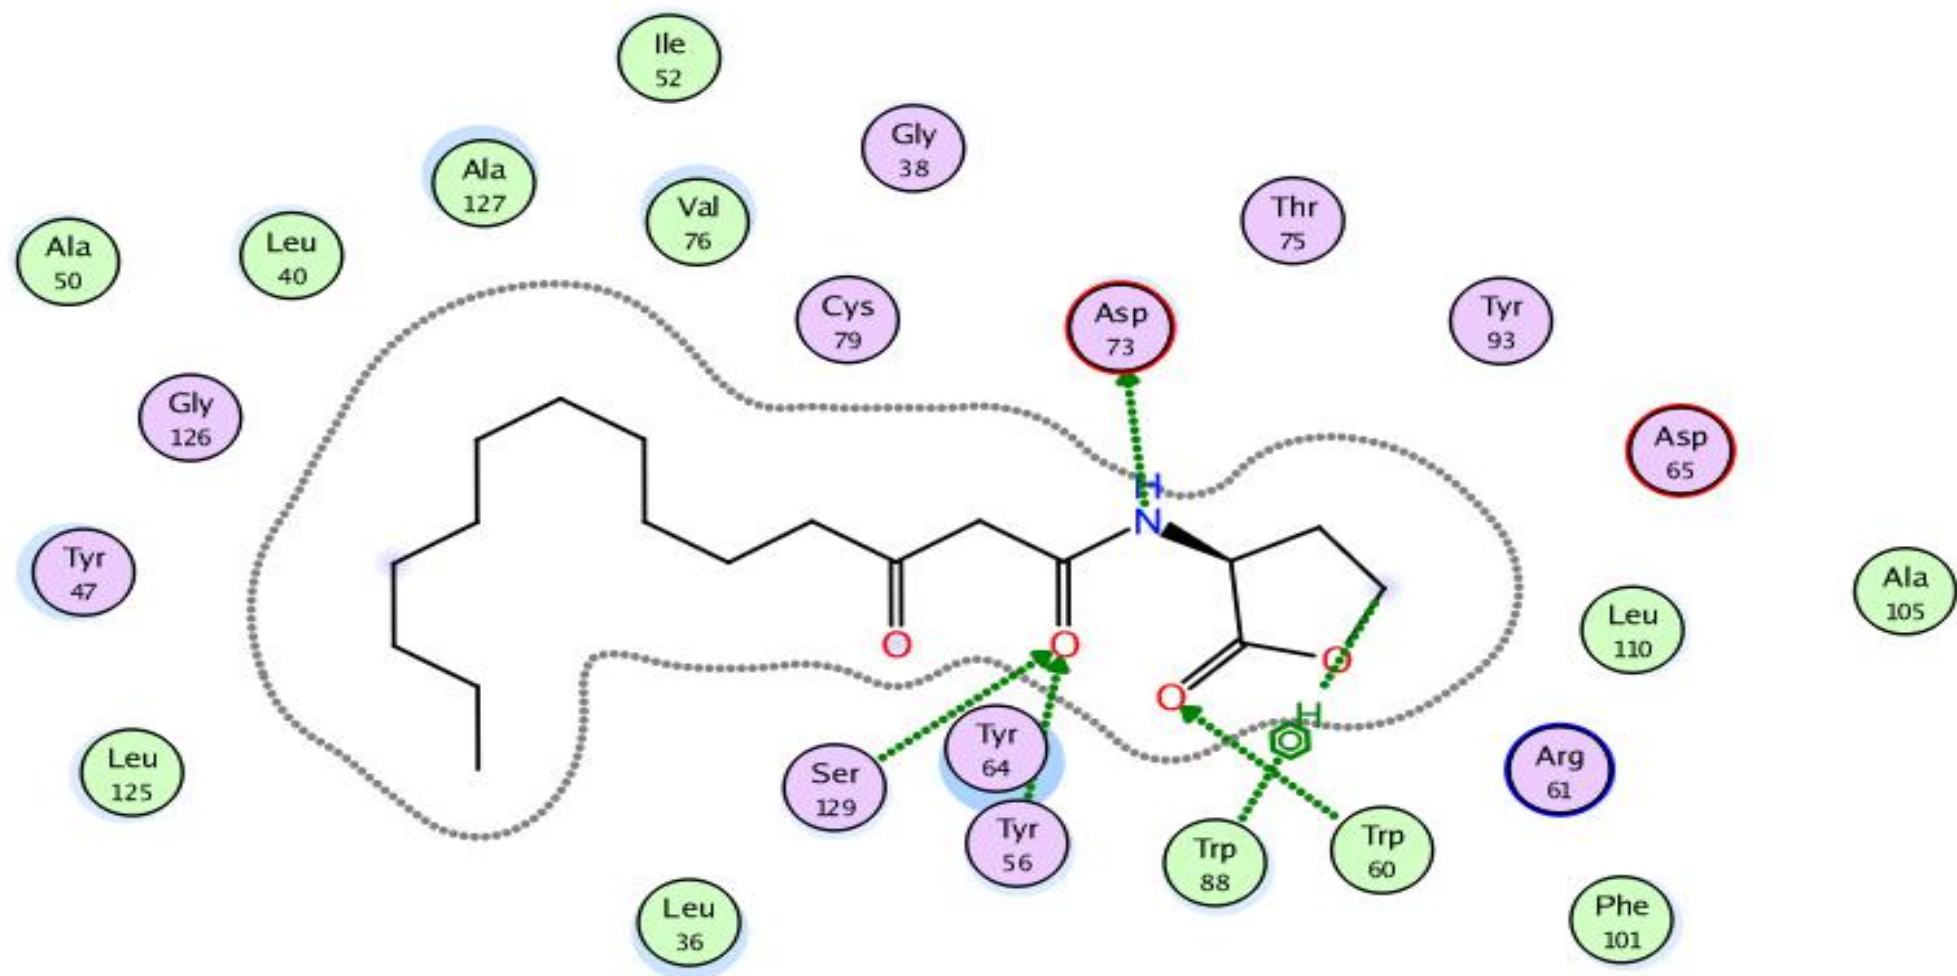

**Figure S2:** 2D structure of Docking pose and ligand interaction of compound **Co-crystallized ligand** inside the active site of LasR (PDB: 6MVN) in *P. aeruginosa* (UCBPP-PA14)

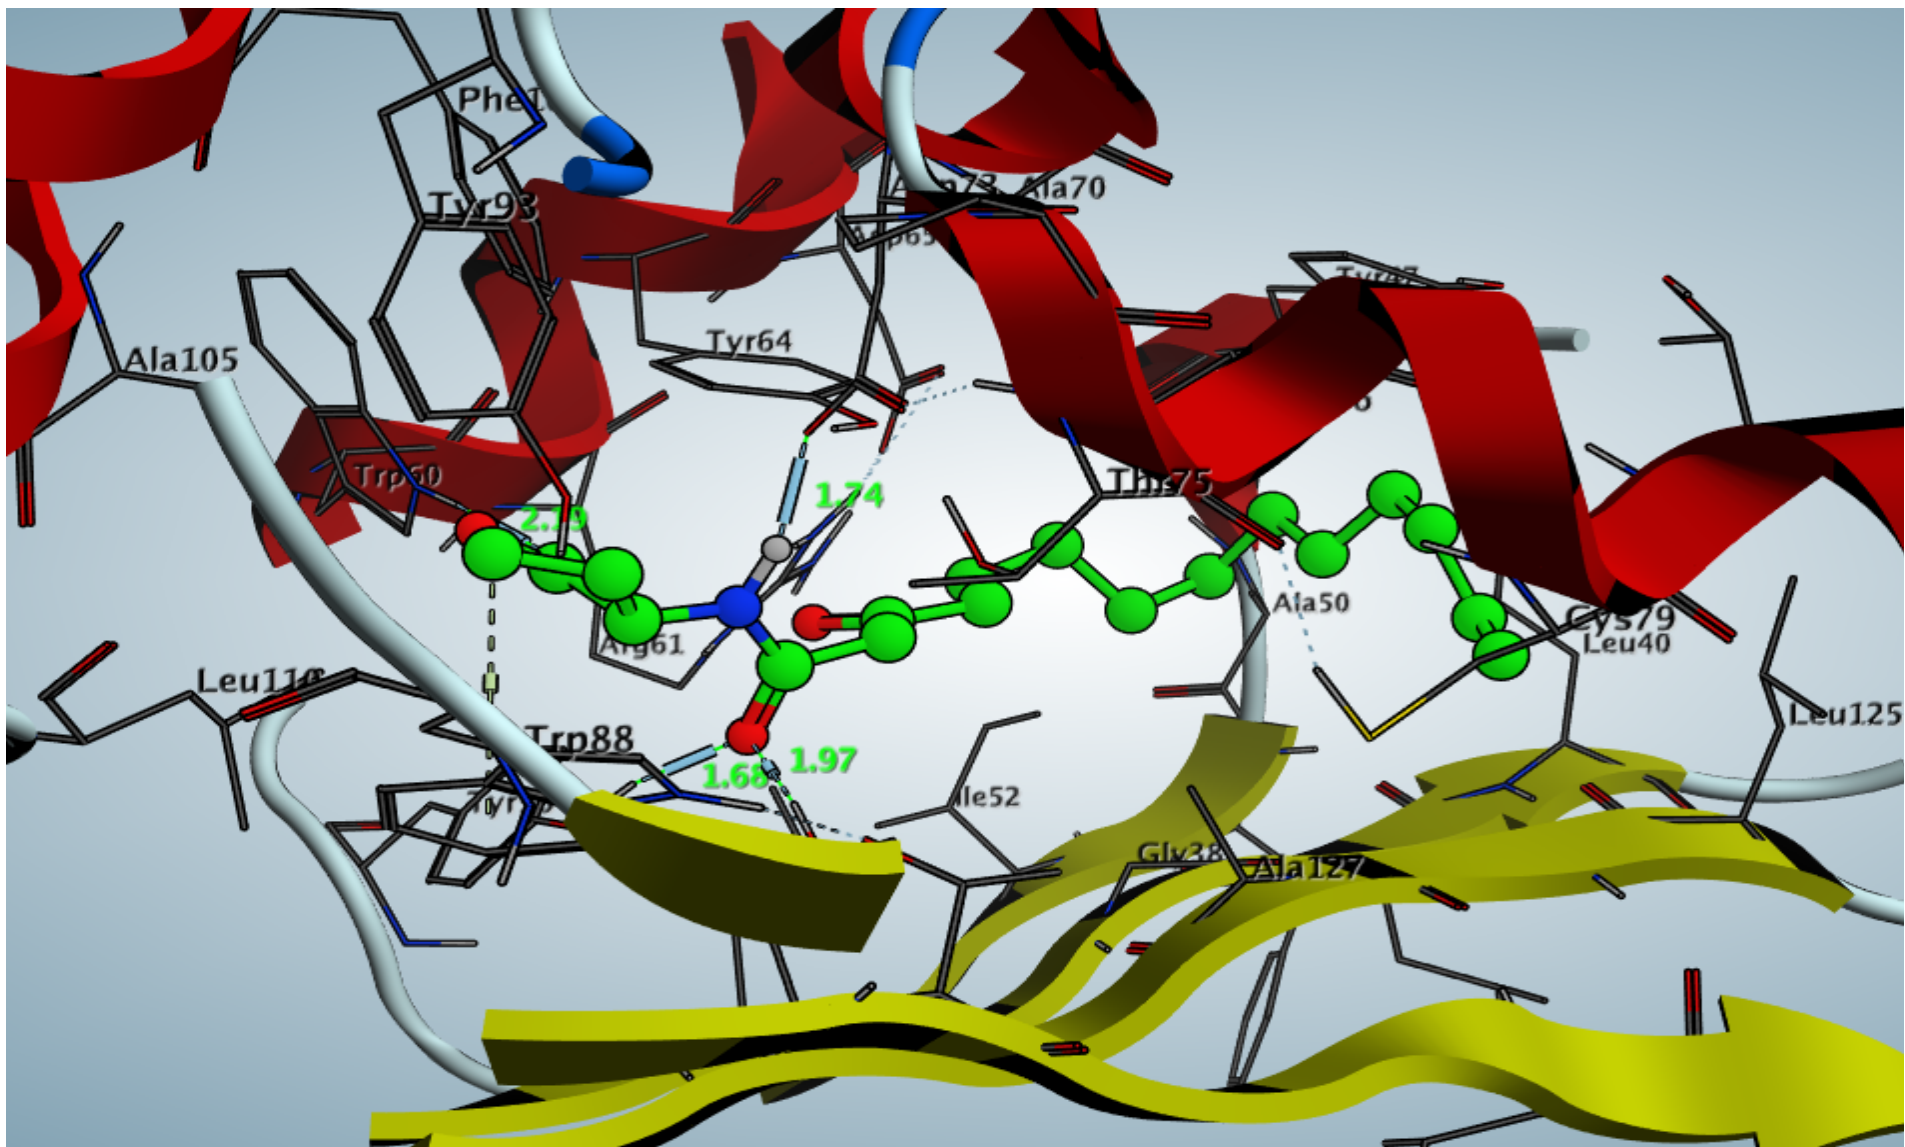

**Figure S3:** 3D structure of Docking pose and ligand interaction of compound **Co-crystallized ligand** inside the active site of LasR (PDB: 6MVN) in *P. aeruginosa* (UCBPP-PA14)

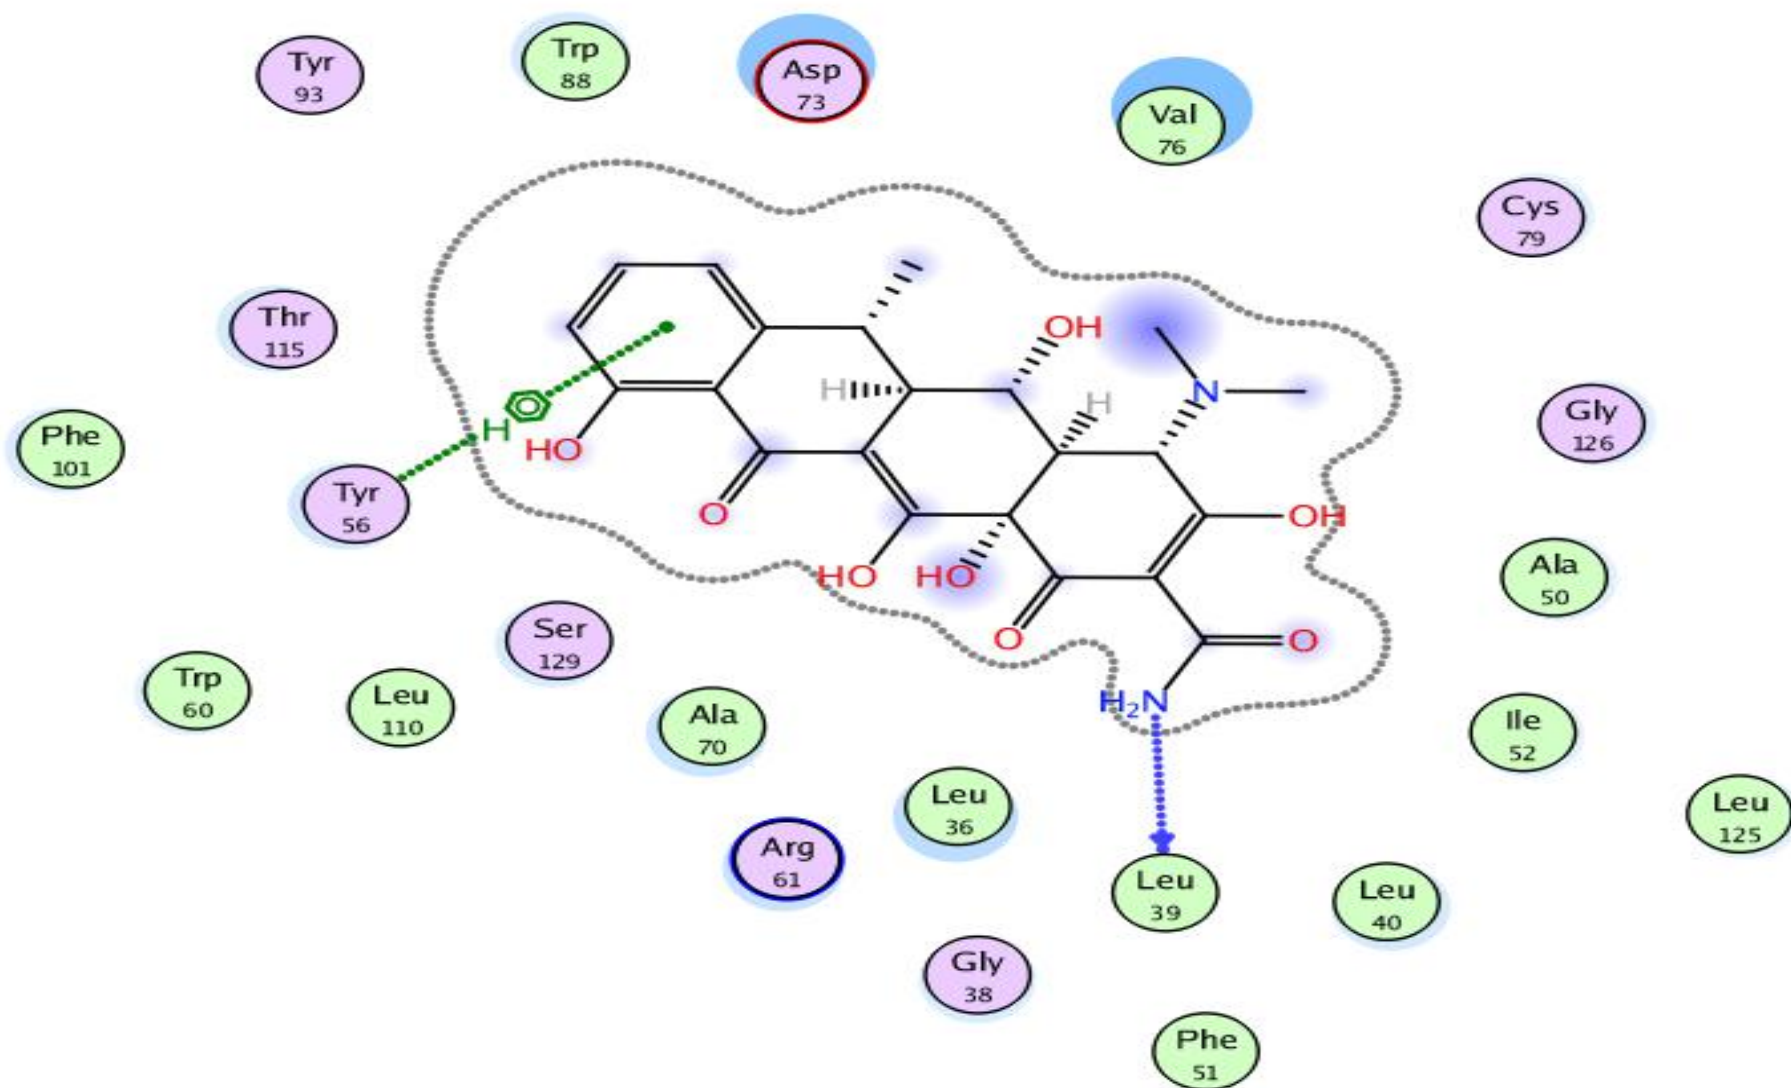

**Figure S4:** 2D structure of Docking pose and ligand interaction of compound **Doxycycline** inside the active site of LasR (PDB: 6MVN) in *P. aeruginosa* (UCBPP-PA14)

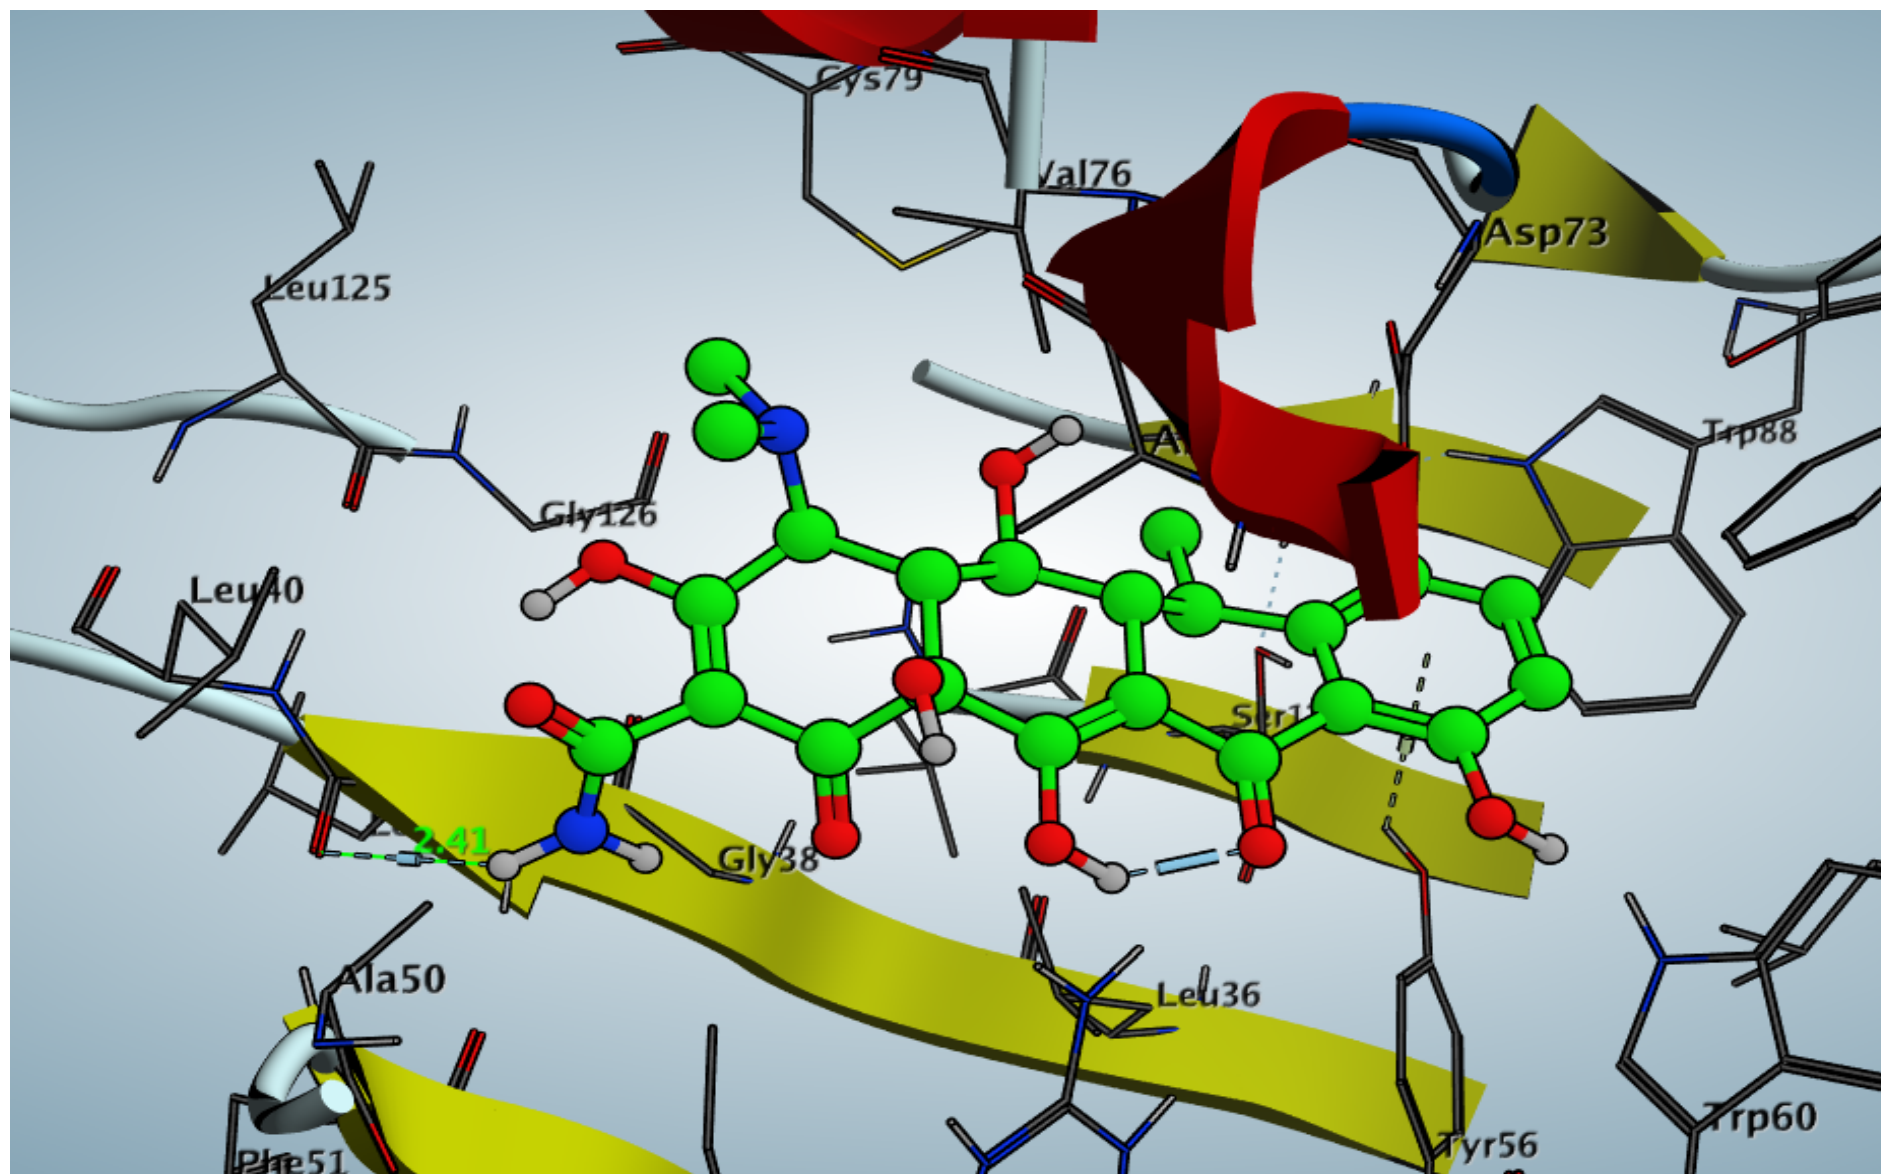

**Figure S5:** 3D structure of Docking pose and ligand interaction of compound **Doxycycline** inside the active site of LasR (PDB: 6MVN) in *P. aeruginosa* (UCBPP-PA14)



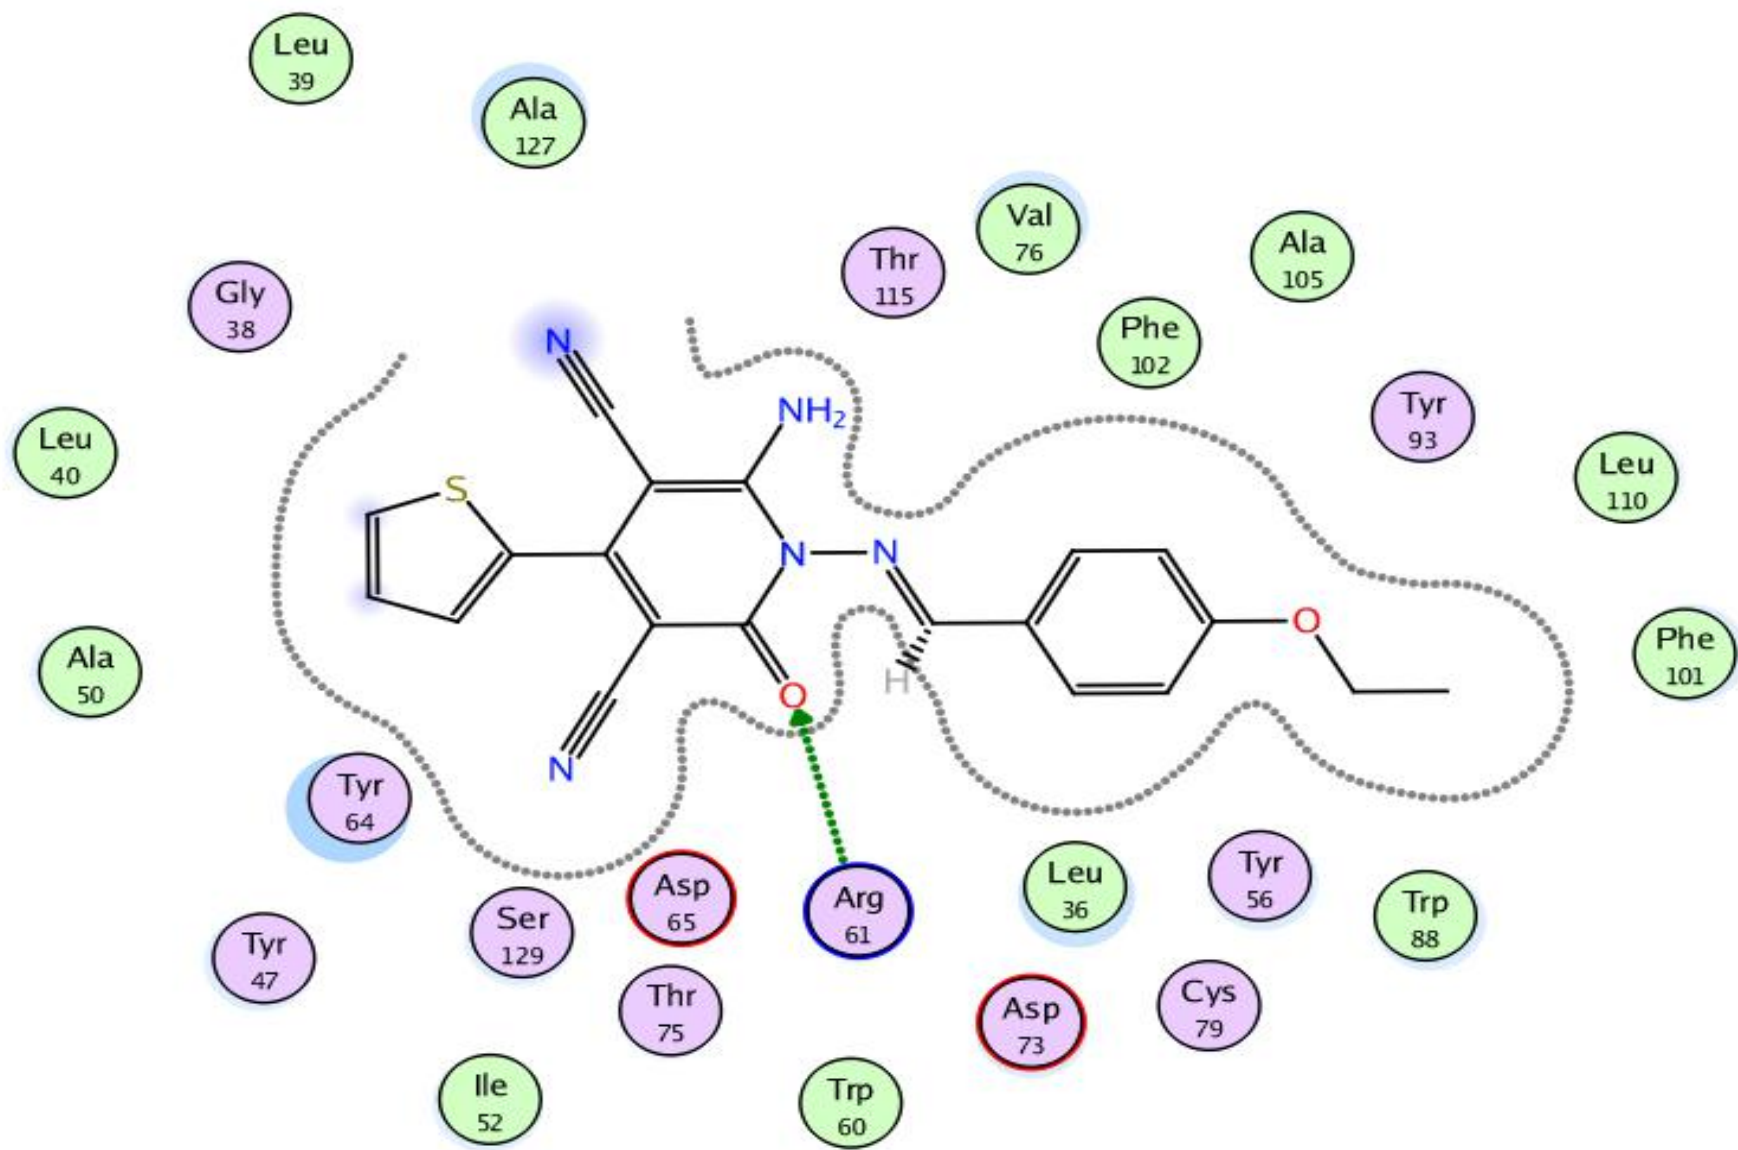

**Figure S6:** 2D structure of Docking pose and ligand interaction of compound **2a** inside the active site of LasR (PDB: 6MVN) in *P. aeruginosa* (UCBPP-PA14)

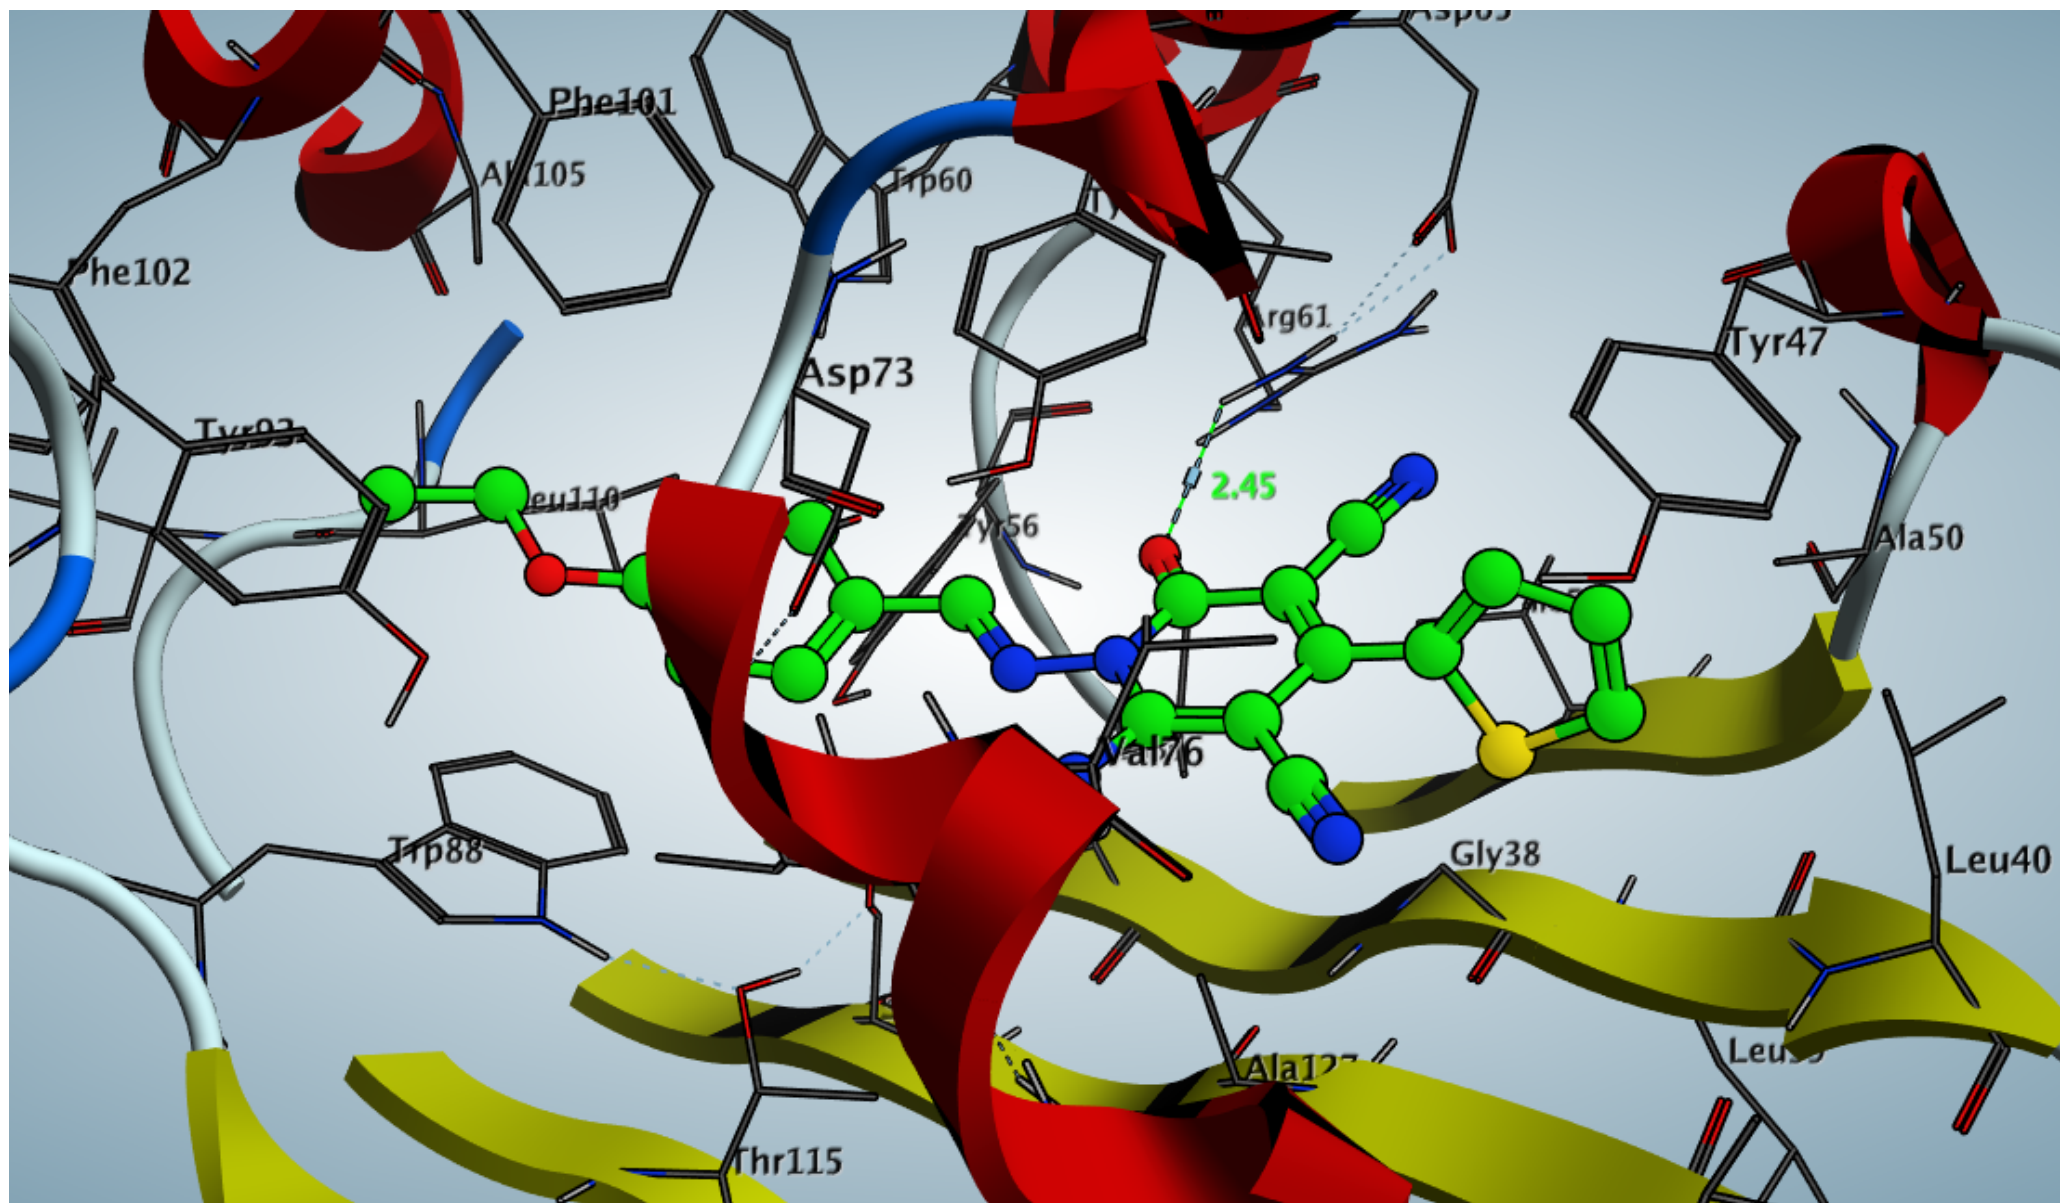

**Figure S7:** 3D structure of Docking pose and ligand interaction of compound **2a** inside the active site of LasR (PDB: 6MVN) in *P. aeruginosa* (UCBPP-PA14)

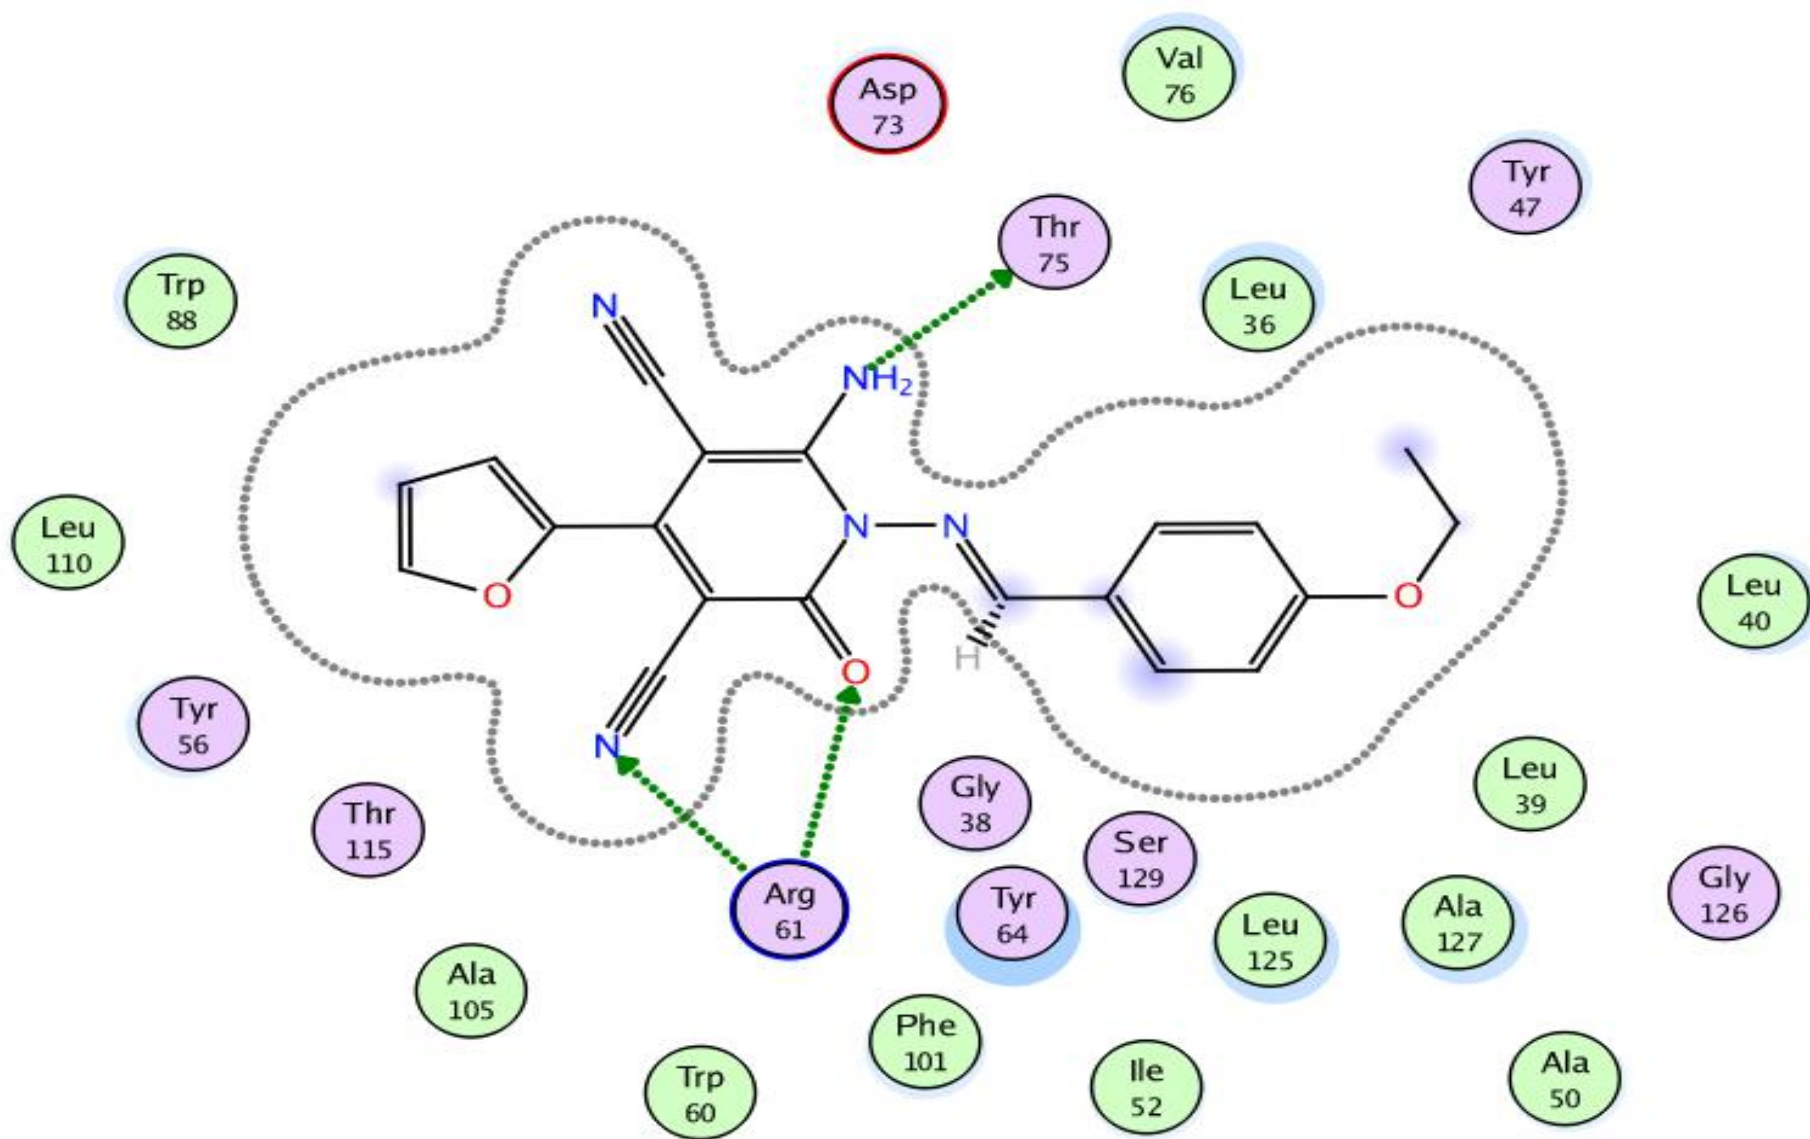

**Figure S8:** 2D structure of Docking pose and ligand interaction of compound **2b** inside the active site of LasR (PDB: 6MVN) in *P. aeruginosa* (UCBPP-PA14)

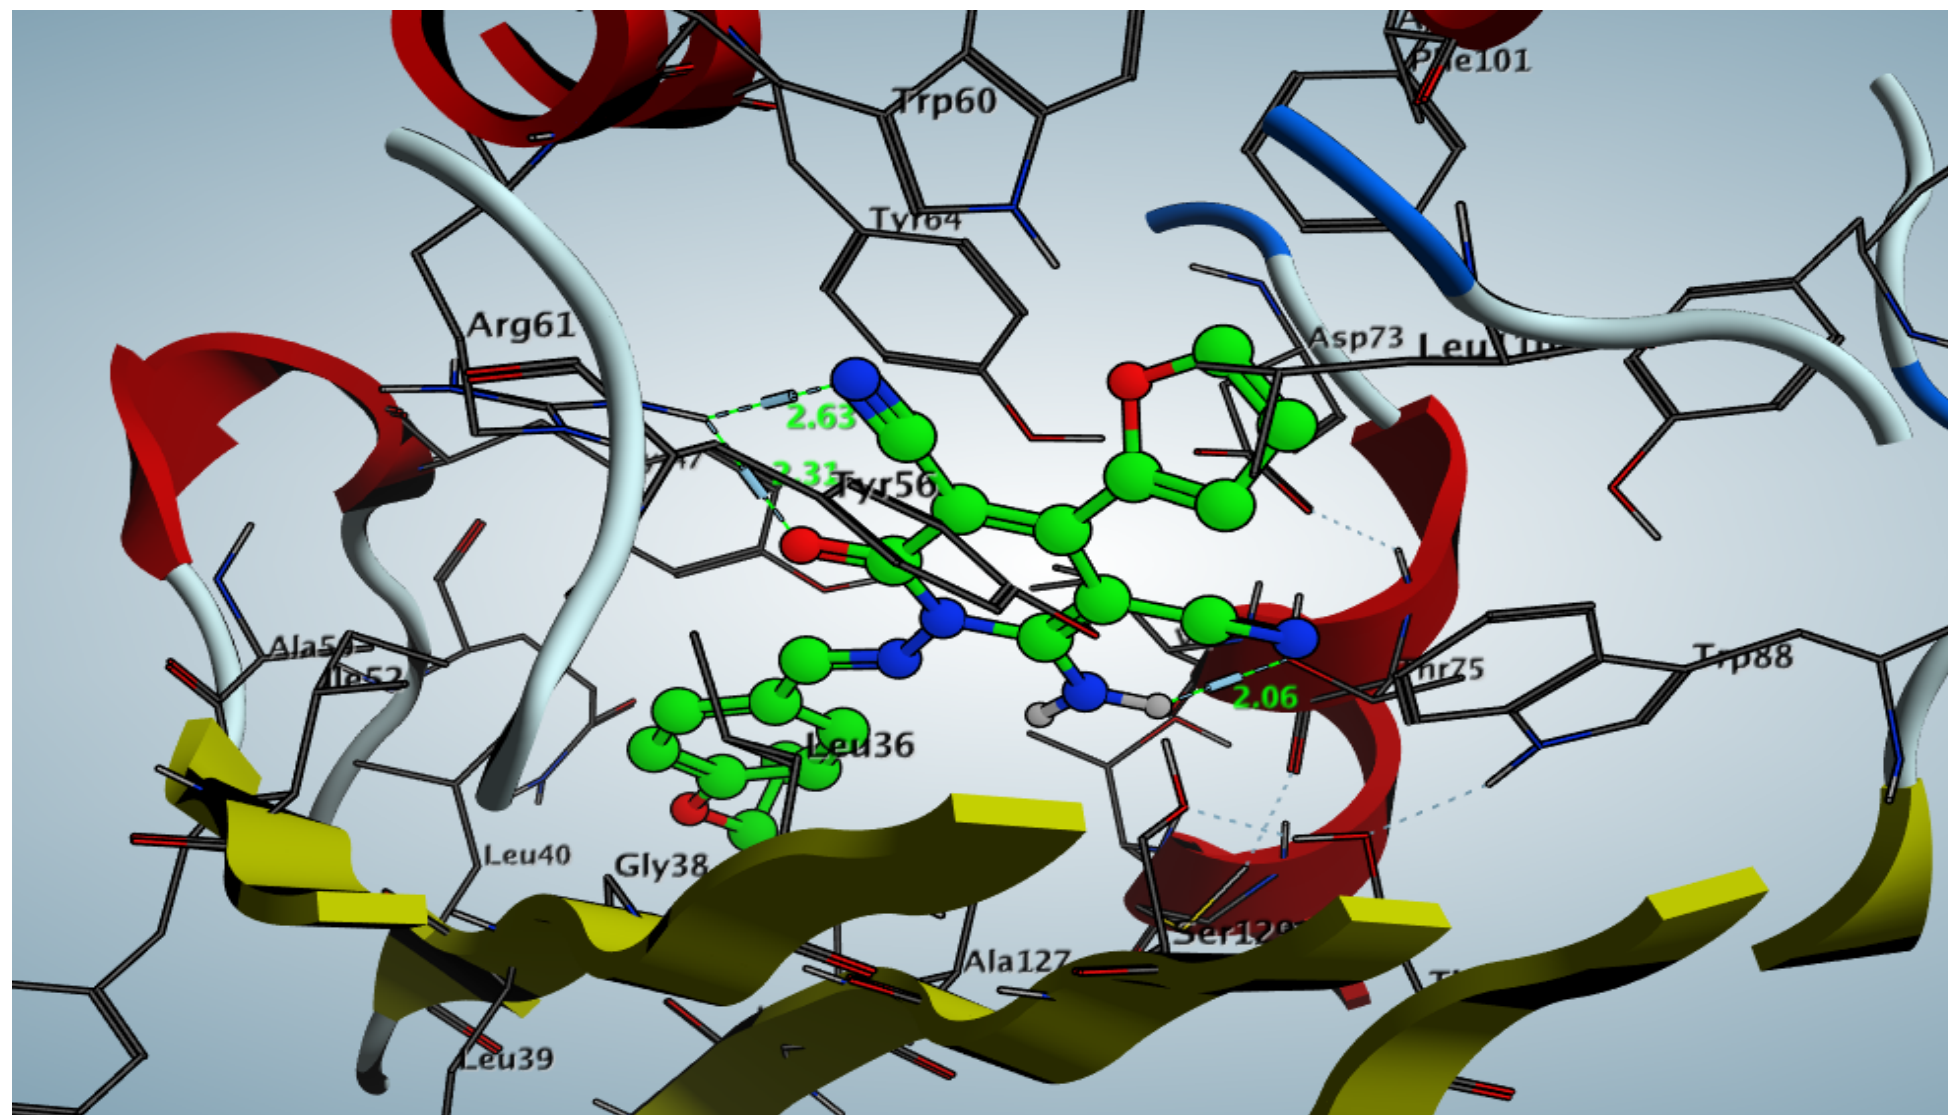

**Figure S9:** 3D structure of Docking pose and ligand interaction of compound **2b** inside the active site of LasR (PDB: 6MVN) in *P. aeruginosa* (UCBPP-PA14)

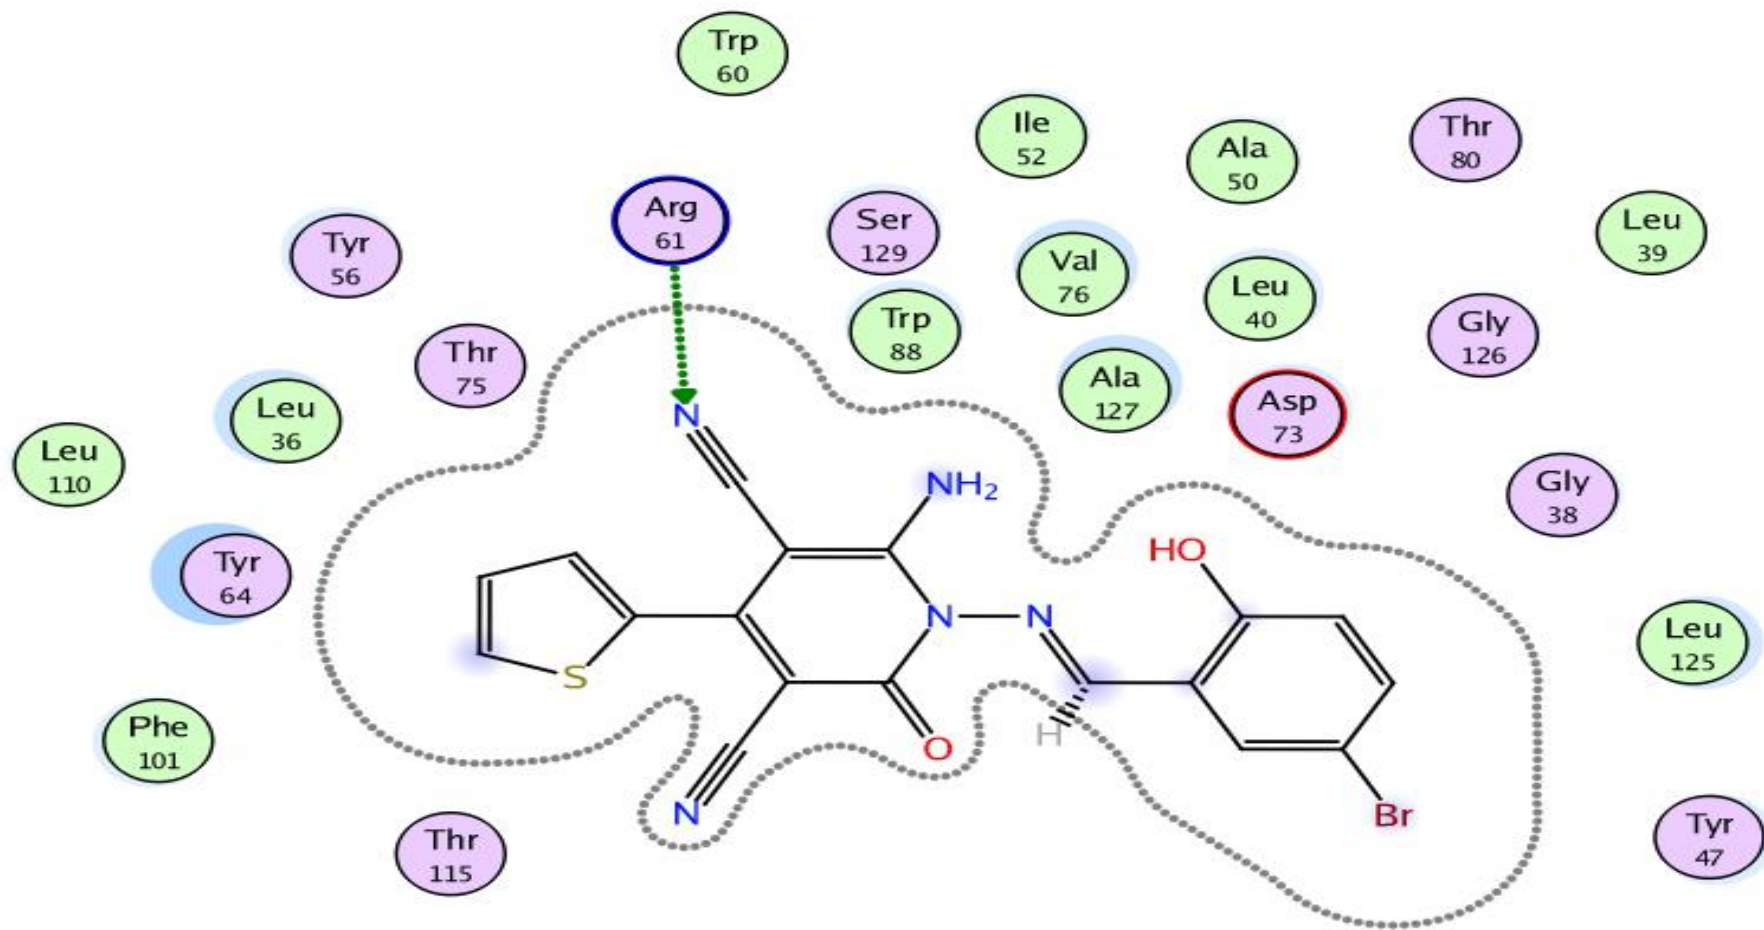

**Figure S10:** 2D structure of Docking pose and ligand interaction of compound **3a** inside the active site of LasR (PDB: 6MVN) in *P. aeruginosa* (UCBPP-PA14)

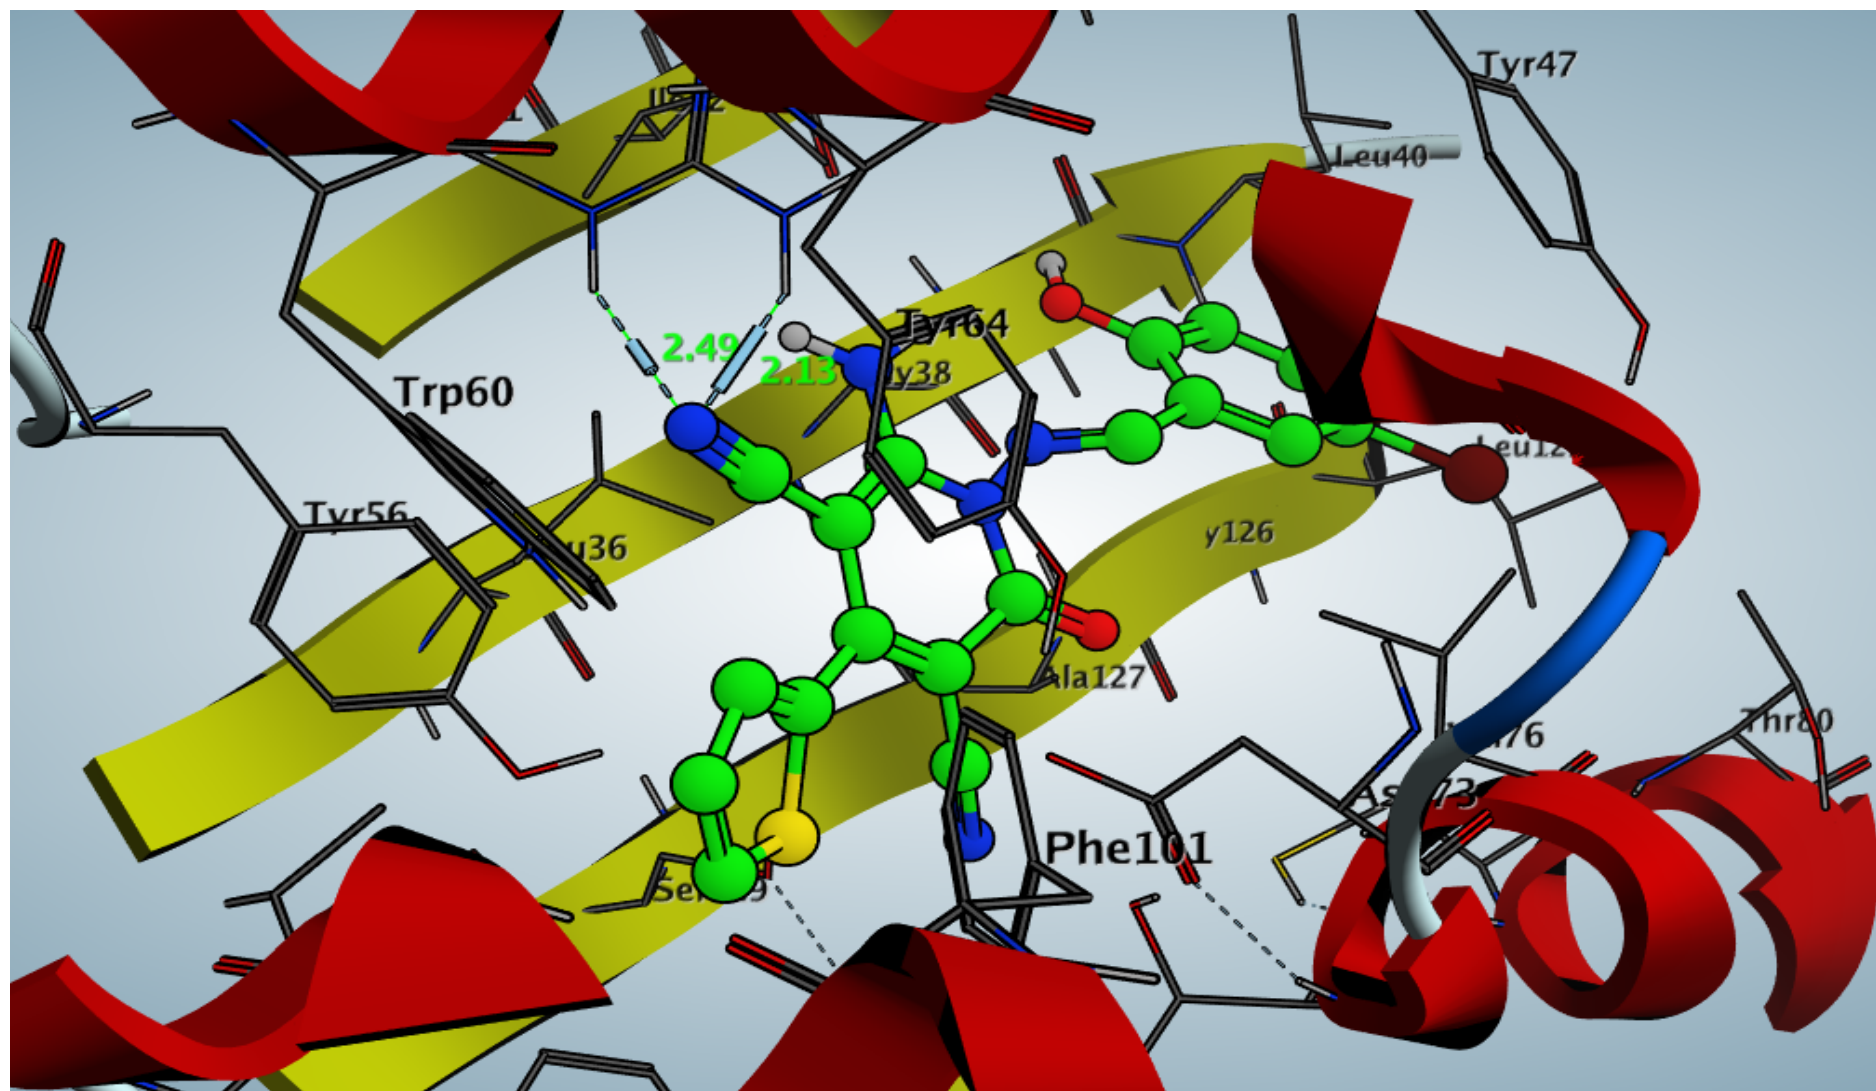

**Figure S11:** 3D structure of Docking pose and ligand interaction of compound **3a** inside the active site of LasR (PDB: 6MVN) in *P. aeruginosa* (UCBPP-PA14)

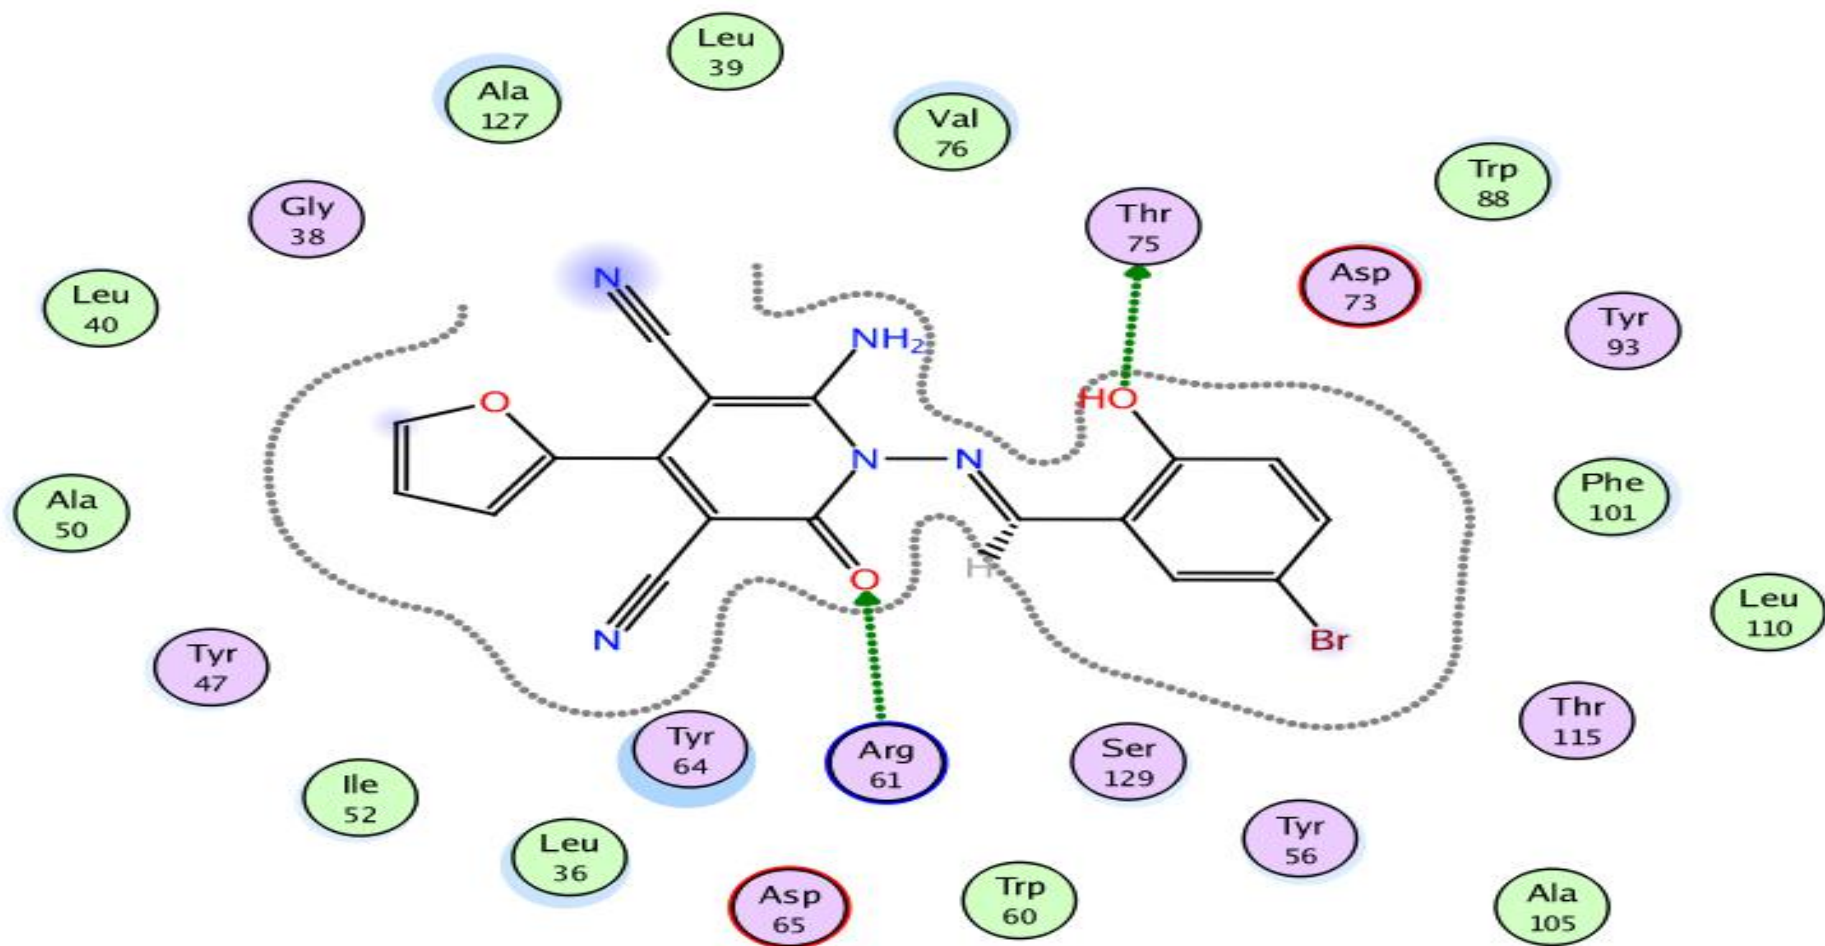

**Figure S12:** 2D structure of Docking pose and ligand interaction of compound **3b** inside the active site of LasR (PDB: 6MVN) in *P. aeruginosa* (UCBPP-PA14)

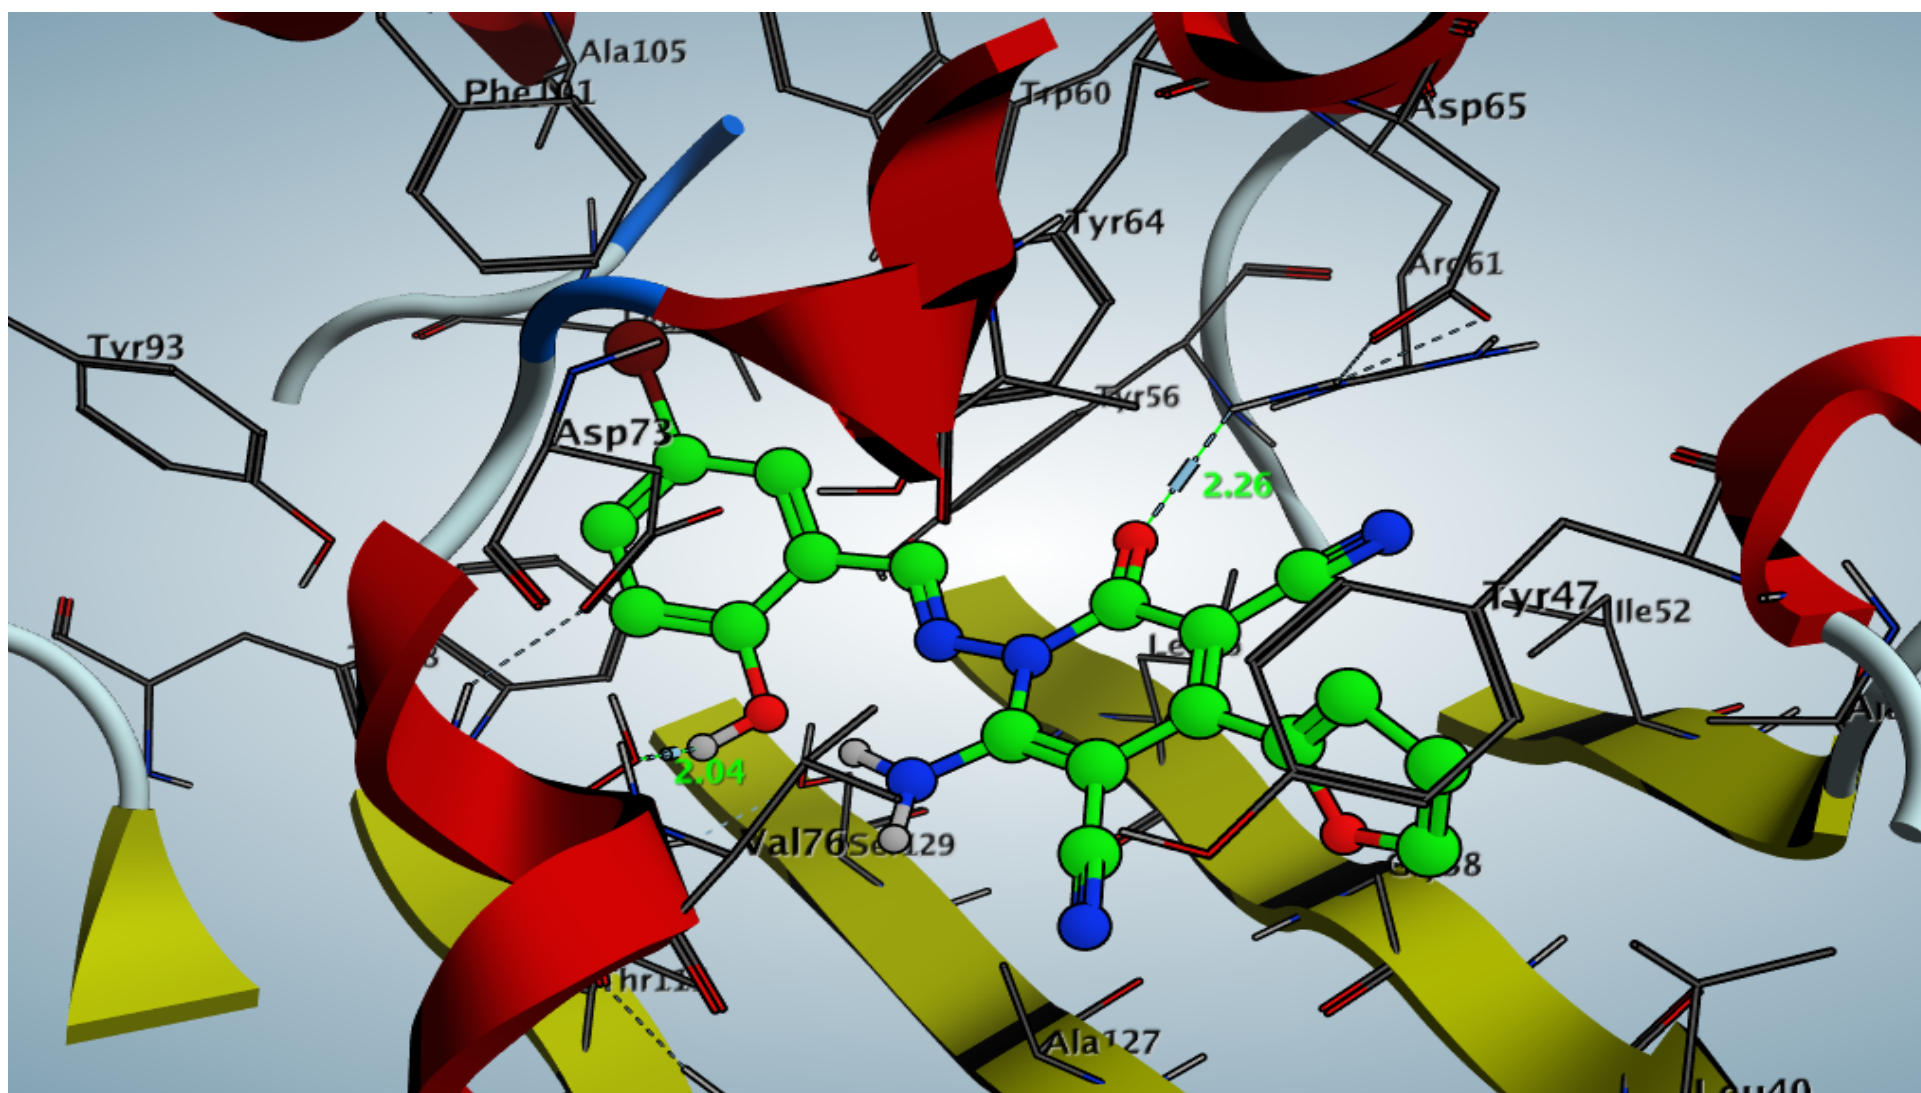

**Figure S13:** 3D structure of Docking pose and ligand interaction of compound **3b** inside the active site of LasR (PDB: 6MVN) in *P. aeruginosa* (UCBPP-PA14)



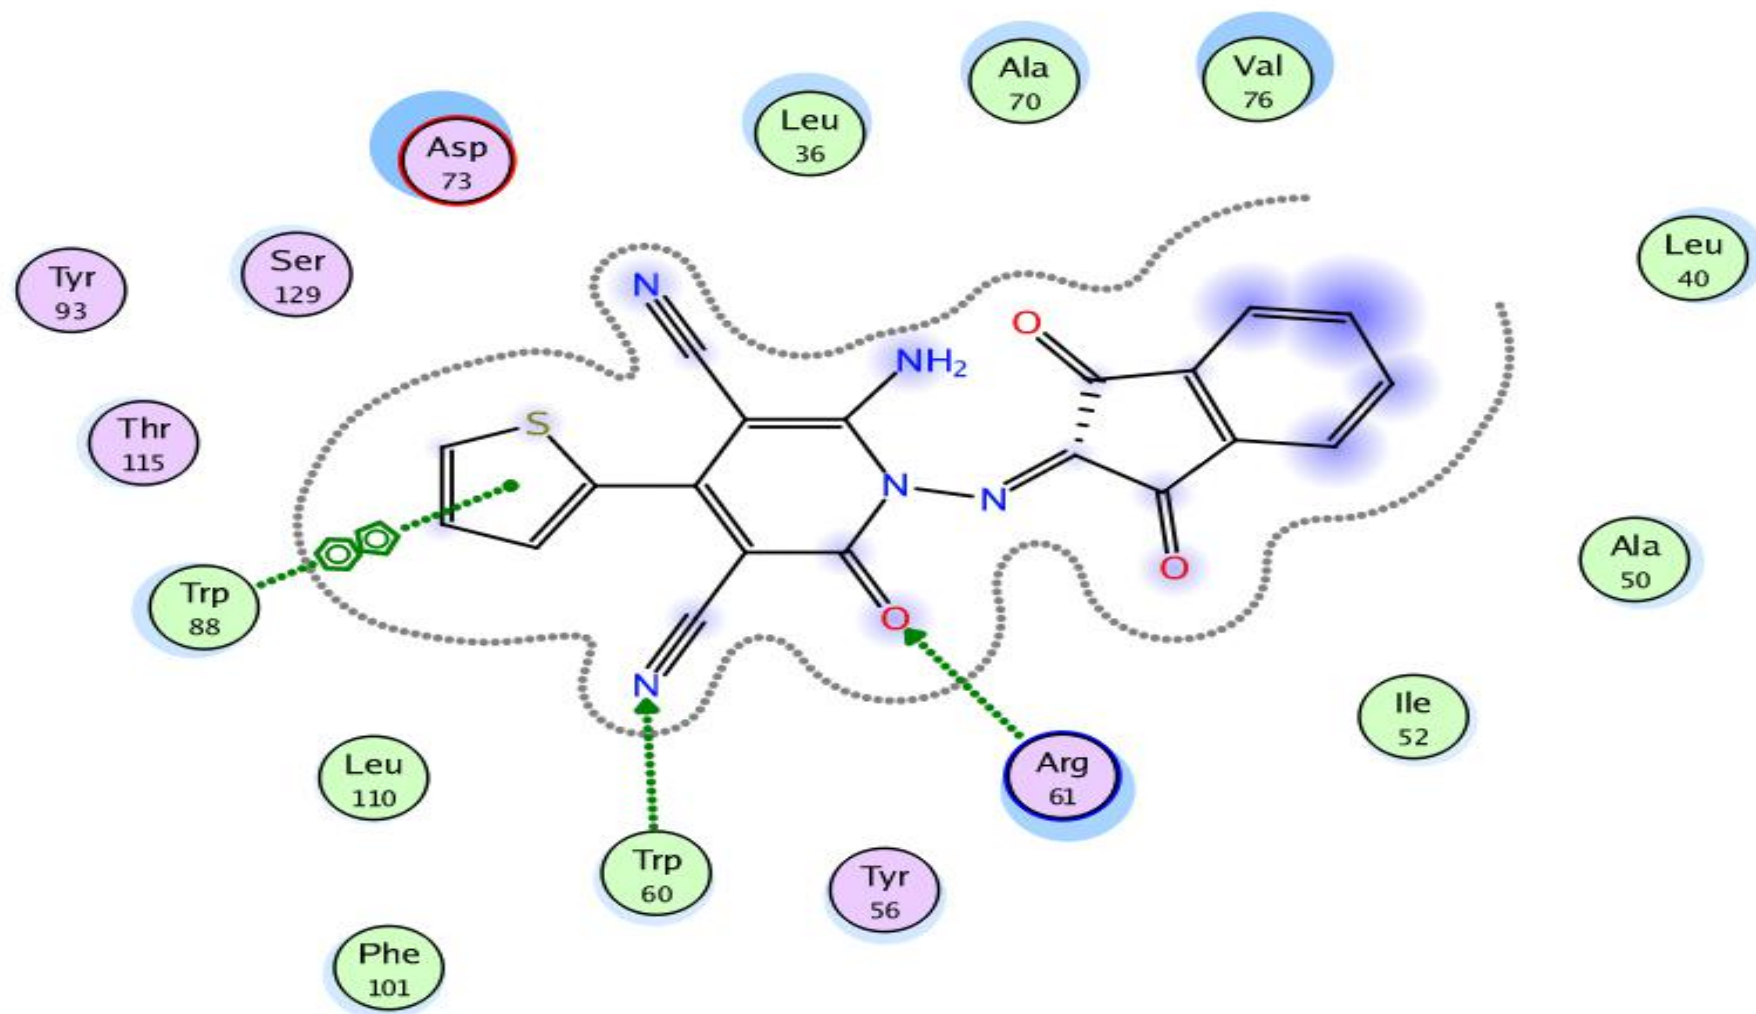

**Figure S14:** 2D structure of Docking pose and ligand interaction of compound **6a** inside the active site of LasR (PDB: 6MVN) in *P. aeruginosa* (UCBPP-PA14)

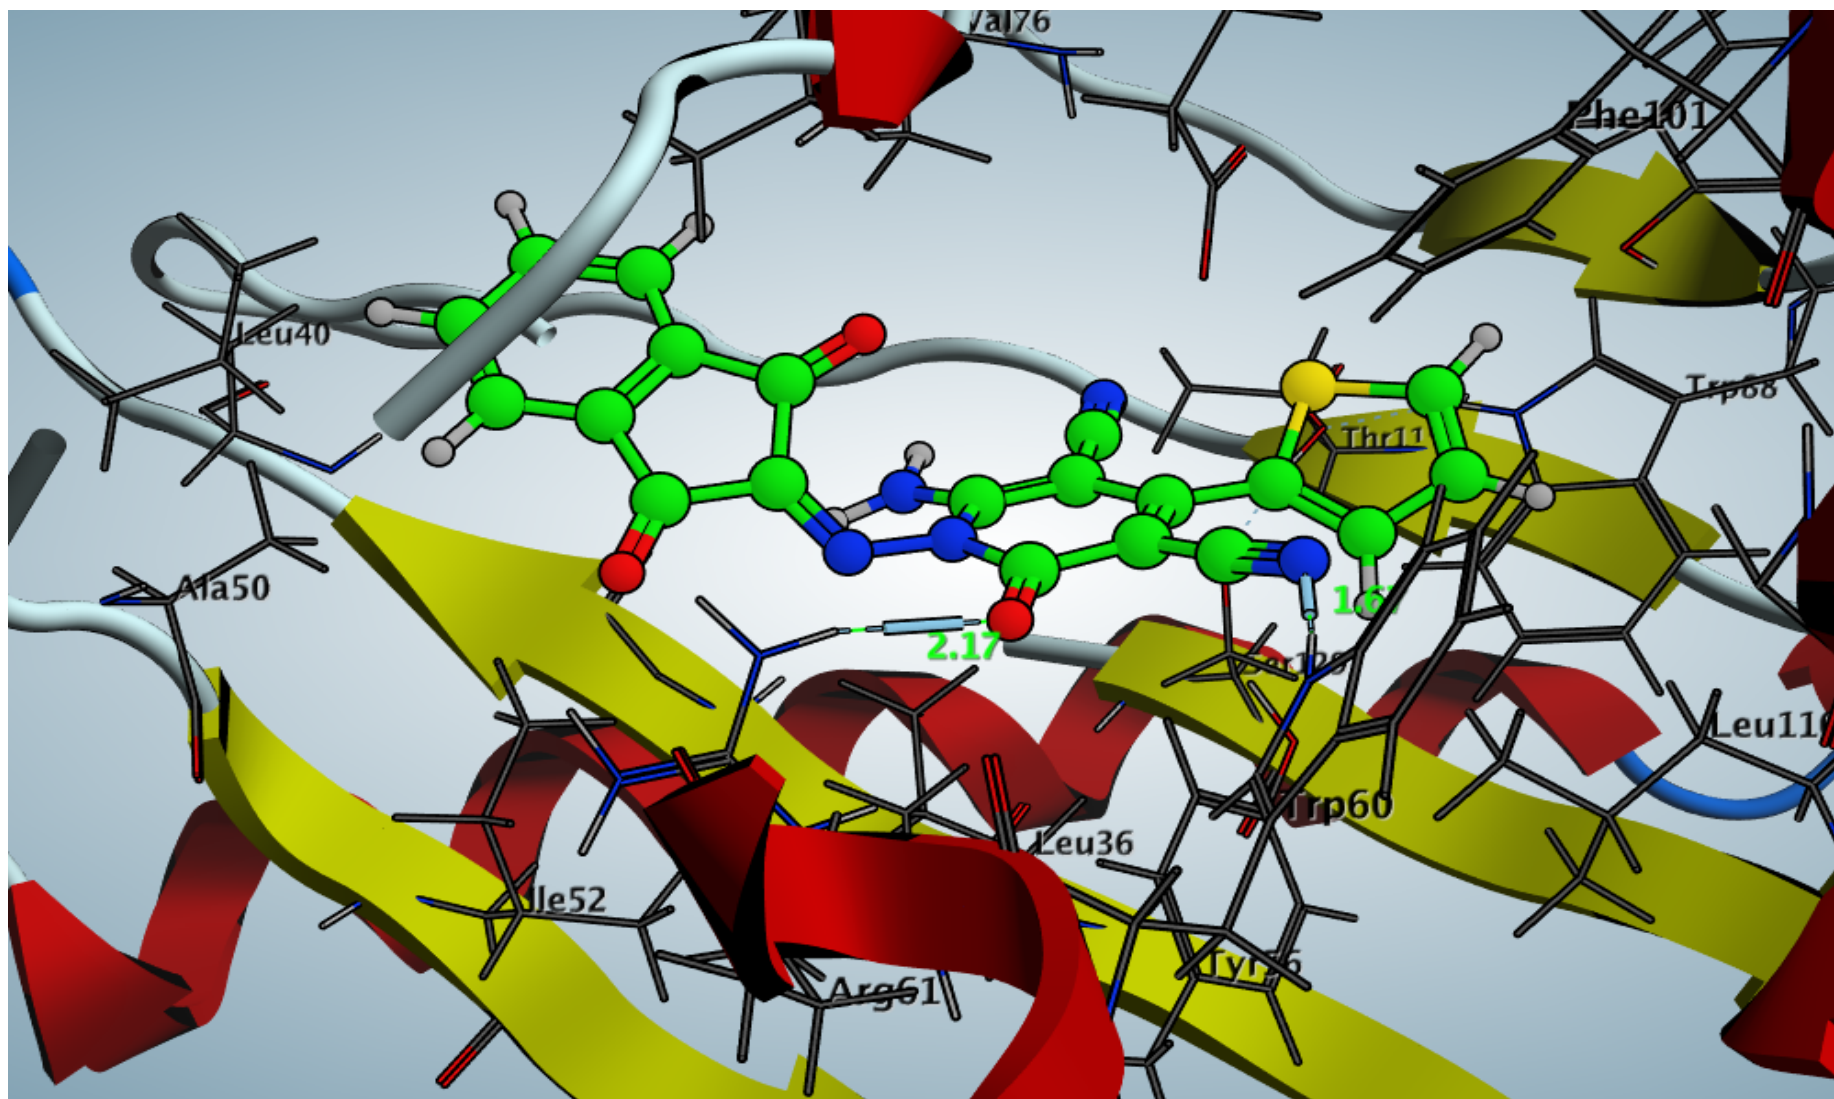

**Figure S15:** 3D structure of Docking pose and ligand interaction of compound **6a** inside the active site of LasR (PDB: 6MVN) in *P. aeruginosa* (UCBPP-PA14)

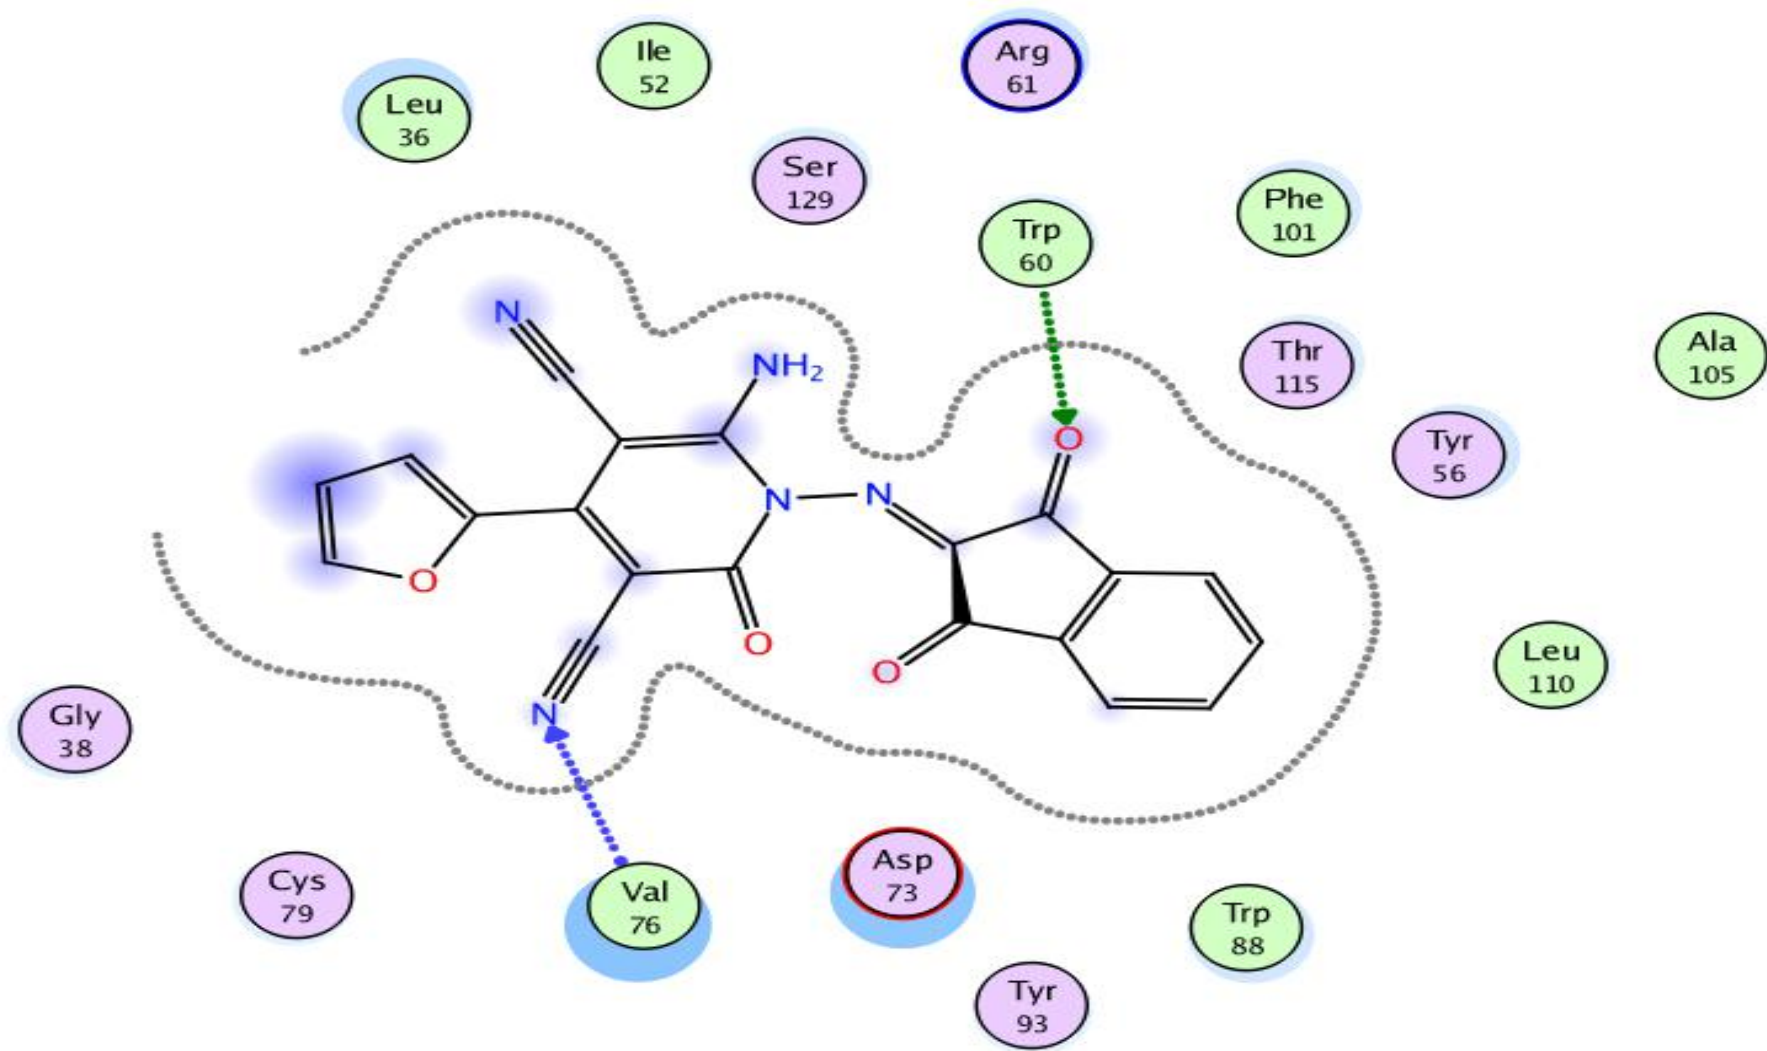

**Figure S16:** 2D structure of Docking pose and ligand interaction of compound **6b** inside the active site of LasR (PDB: 6MVN) in *P. aeruginosa* (UCBPP-PA14)

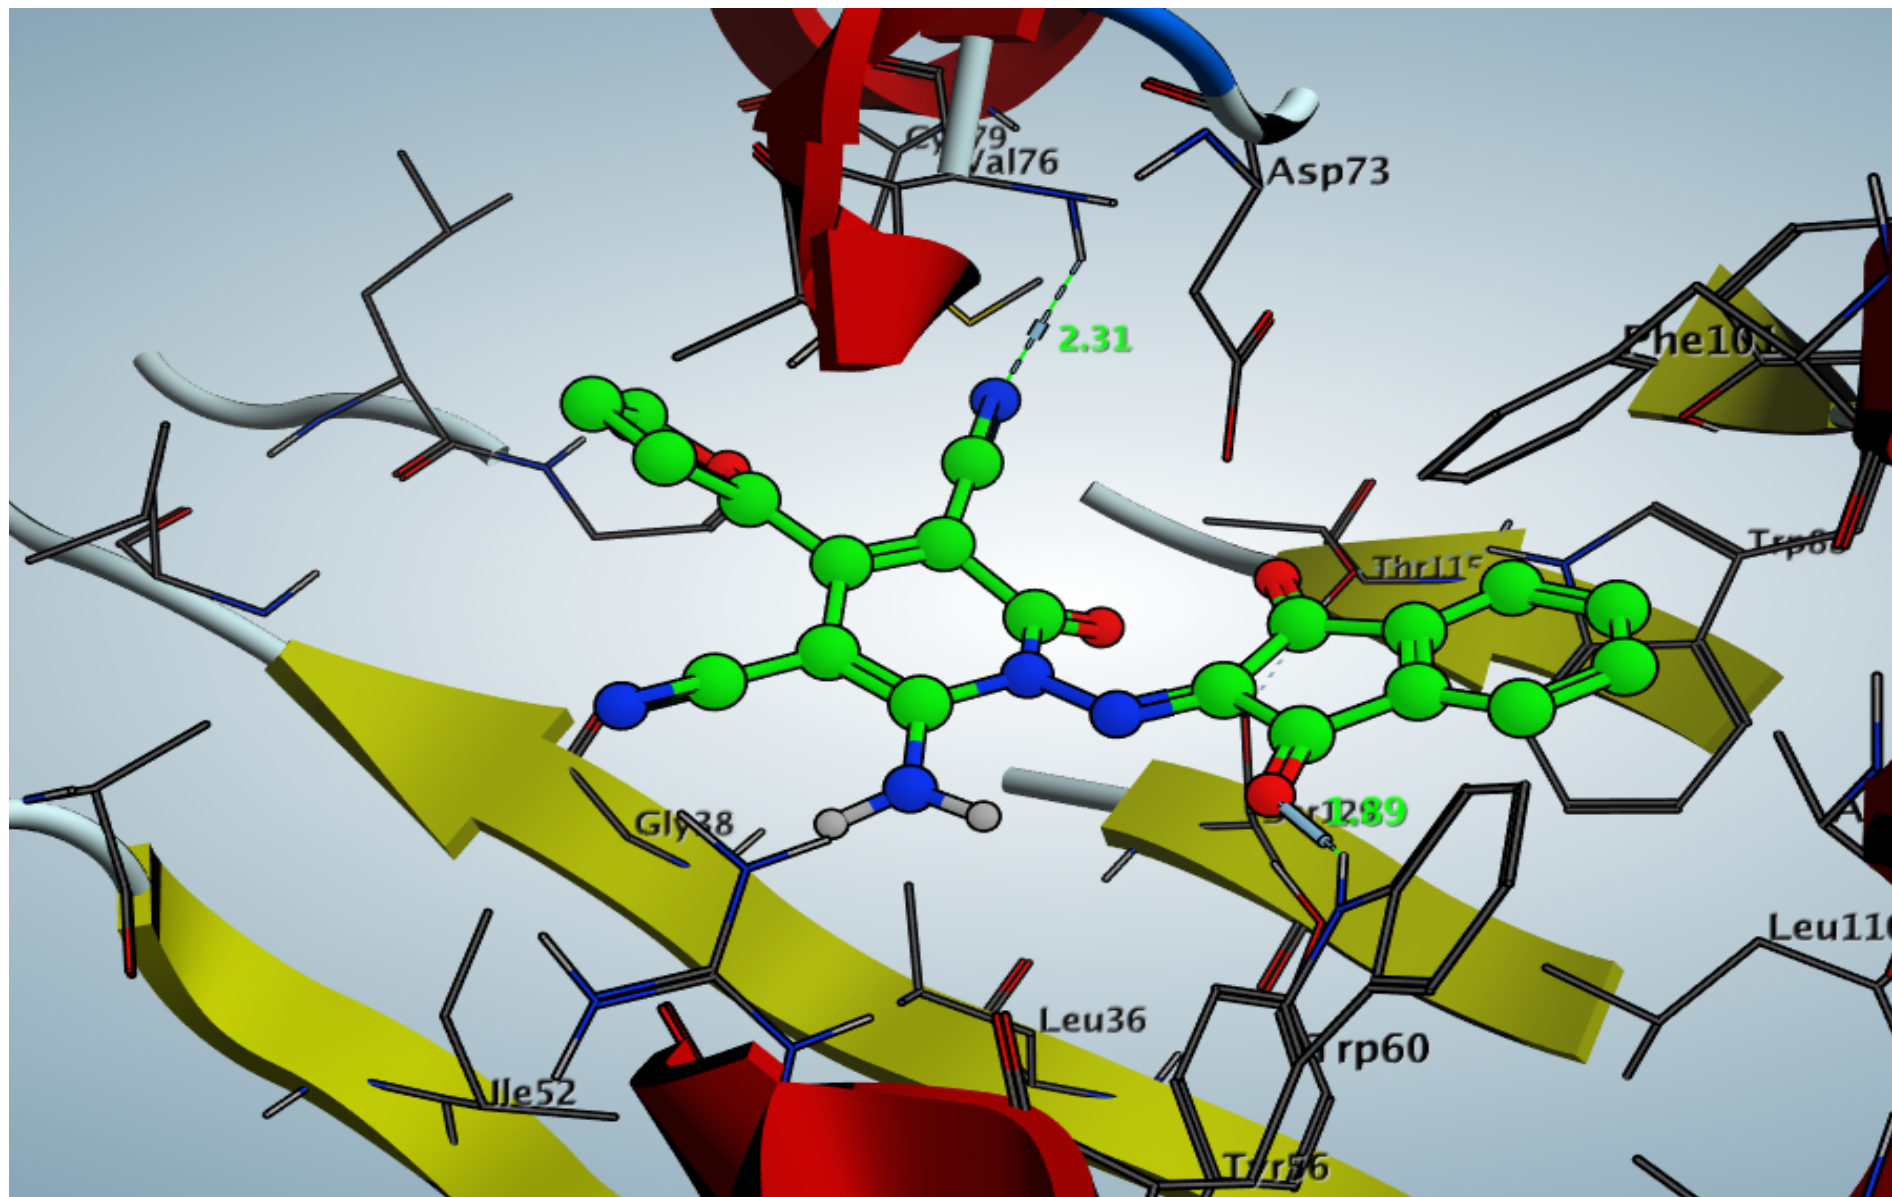

**Figure S17:** 3D structure of Docking pose and ligand interaction of compound **6b** inside the active site of LasR (PDB: 6MVN) in *P. aeruginosa* (UCBPP-PA14)
